# Supplementary material for: Preneoplastic Alterations Define CLL DNA Methylome and Persist through Disease Progression and Therapy
Source: Oxford University Press journal article supplement (doi:10.1158/2643-3230.bcd-19-0058), 2020-12-03
Supplement: 26433230bcd190058-sup-232231_2_supp_6719388_qjpcg1.xlsx [file 26433230bcd190058-sup-232231_2_supp_6719388_qjpcg1.xlsx]

## Sheet: CLL
Supplementary Table 2: CLL DMRs
chr	start	end	type	position	gene	DMR	comparison	CLL_unmutated	naiBC	CLL_mutated	memBC
chr1	10009216	10009293	genebody,promoter	chr1:10002980-10010032,chr1:10003485-10045559,chr1:10007375-10007694	NMNAT1;ENSG00000173614.9;protein_coding,RN7SKP269;ENSG00000202415.1;misc_RNA,RP11-84A14.4;ENSG00000228150.1;sense_intronic	hypo	mutCLL_MBC	0.50468	0.9978	0.71238	0.98589
chr1	100618373	100618442	genebody	chr1:100614408-100643771	LRRC39;ENSG00000122477.8;protein_coding	hypo	unmutCLL_NBCB	0.7455	0.99933	0.8588	0.9395
chr1	100842719	100842886	genebody,promoter	chr1:100810583-100985833,chr1:100844237-100844331	AC104457.1;ENSG00000216067.1;miRNA,CDC14A;ENSG00000079335.13;protein_coding	hypo	unmutCLL_NBCB	0.69553	0.9975	0.883212	0.939
chr1	10748693	10748779	genebody	chr1:10696660-10856707	CASZ1;ENSG00000130940.10;protein_coding	hypo	unmutCLL_NBCB	0.46293	0.73633	0.81385	0.961
chr1	109422366	109422410	genebody	chr1:109358519-109506106,chr1:109417971-109477167	AKNAD1;ENSG00000162641.14;protein_coding,GPSM2;ENSG00000121957.8;protein_coding	hypo	mutCLL_MBC,unmutCLL_NBCB	0.65828	0.99213	0.72757	0.98013
chr1	11001020	11001111	intergenic	NA:NA-NA	NA	hypo	unmutCLL_NBCB	0.51678	0.98393	0.764167	0.9415
chr1	1100965	1101046	promoter	chr1:1102483-1102578,chr1:1103242-1103332,chr1:1104384-1104467,chr1:1104736-1105723	MIR200A;ENSG00000207607.1;miRNA,MIR200B;ENSG00000207730.1;miRNA,MIR429;ENSG00000198976.1;miRNA,RP11-465B22.8;ENSG00000272141.1;lincRNA	hypo	unmutCLL_NBCB	0.72173	0.99333	0.788947	0.881667
chr1	11071066	11071092	promoter	chr1:11072413-11085796	TARDBP;ENSG00000120948.11;protein_coding	hypo	unmutCLL_NBCB	0.72847	0.99989	0.898727	0.958167
chr1	110712870	110712880	genebody,promoter	chr1:110693107-110744824,chr1:110708807-110715111	RP5-1028L10.1;ENSG00000227091.1;antisense,SLC6A17;ENSG00000197106.6;protein_coding	hypo	mutCLL_MBC	0.674056	1	0.62199	0.94133
chr1	111945470	111945520	intergenic	NA:NA-NA	NA	hypo	unmutCLL_NBCB	0.35454	0.99811	0.4422	0.9875
chr1	113658272	113658438	genebody	chr1:113615830-113674882	LRIG2;ENSG00000198799.7;protein_coding	hypo	mutCLL_MBC	0.7916	0.997733	0.72742	0.98647
chr1	114299509	114299644	promoter	chr1:114239452-114302111	PHTF1;ENSG00000116793.11;protein_coding	hypo	mutCLL_MBC,unmutCLL_NBCB	0.085172	0.9949	0.44599	0.99081
chr1	1145846	1145907	promoter	chr1:1138887-1142071	TNFRSF18;ENSG00000186891.9;protein_coding	hypo	unmutCLL_NBCB	0.69982	0.98533	0.821033	0.905067
chr1	1157520	1157550	genebody	chr1:1152287-1167411	SDF4;ENSG00000078808.12;protein_coding	hypo	unmutCLL_NBCB	0.55495	0.98027	0.846788	0.958667
chr1	116184493	116184535	promoter	chr1:116184573-116240845	VANGL1;ENSG00000173218.10;protein_coding	hyper	unmutCLL_NBCB	0.32068	0.0068333	0.211727	0.0248095
chr1	116653387	116653406	promoter	chr1:116654375-116677861	MAB21L3;ENSG00000173212.4;protein_coding	hypo	unmutCLL_NBCB	0.71448	1	0.880636	0.951833
chr1	118114945	118114989	intergenic	NA:NA-NA	NA	hypo	mutCLL_MBC,unmutCLL_NBCB	0.23941	0.99389	0.45013	0.96667
chr1	1186892	1187023	promoter	chr1:1177825-1182102,chr1:1185156-1186714	FAM132A;ENSG00000184163.3;protein_coding,RP5-902P8.12;ENSG00000260179.1;lincRNA	hypo	unmutCLL_NBCB	0.67656	0.99878	0.826455	0.913
chr1	12022521	12022567	genebody	chr1:11994261-12035595	PLOD1;ENSG00000083444.12;protein_coding	hypo	mutCLL_MBC,unmutCLL_NBCB	0.64757	0.98978	0.58259	0.96933
chr1	12052533	12052715	genebody	chr1:12040237-12073571	MFN2;ENSG00000116688.12;protein_coding	hypo	unmutCLL_NBCB	0.68212	0.99667	0.761944	0.9516
chr1	121139129	121139182	promoter	chr1:121102016-121140666,chr1:121138613-121204983	AL592494.5;ENSG00000227082.1;lincRNA,RP11-343N15.1;ENSG00000230806.1;lincRNA	hypo	mutCLL_MBC	0.1779	0.8455	0.29016	0.85889
chr1	12188200	12188334	genebody	chr1:12123433-12204264	TNFRSF8;ENSG00000120949.10;protein_coding	hypo	unmutCLL_NBCB	0.091973	0.98367	0.183325	0.960867
chr1	12188470	12188528	genebody	chr1:12123433-12204264	TNFRSF8;ENSG00000120949.10;protein_coding	hypo	unmutCLL_NBCB	0.095696	0.97808	0.56015	0.920889
chr1	12201504	12201749	genebody	chr1:12123433-12204264	TNFRSF8;ENSG00000120949.10;protein_coding	hypo	unmutCLL_NBCB	0.64776	0.99853	0.777667	0.979424
chr1	12202239	12202403	genebody	chr1:12123433-12204264	TNFRSF8;ENSG00000120949.10;protein_coding	hypo	unmutCLL_NBCB	0.20824	0.99233	0.701042	0.9905
chr1	12202264	12202386	genebody	chr1:12123433-12204264	TNFRSF8;ENSG00000120949.10;protein_coding	hypo	mutCLL_MBC	0.2131	0.996167	0.71731	0.98913
chr1	12230507	12230653	genebody	chr1:12227059-12269285	TNFRSF1B;ENSG00000028137.12;protein_coding	hypo	unmutCLL_NBCB	0.056729	0.9929	0.650737	0.967167
chr1	12230519	12230653	genebody	chr1:12227059-12269285	TNFRSF1B;ENSG00000028137.12;protein_coding	hypo	mutCLL_MBC	0.04164	0.990067	0.67974	0.97228
chr1	12267821	12267834	genebody	chr1:12227059-12269285	TNFRSF1B;ENSG00000028137.12;protein_coding	hypo	mutCLL_MBC	0.2261	0.985667	0.56515	0.97256
chr1	12267821	12267890	genebody	chr1:12227059-12269285	TNFRSF1B;ENSG00000028137.12;protein_coding	hypo	unmutCLL_NBCB	0.41094	0.98787	0.584625	0.957417
chr1	1267848	1267953	promoter	chr1:1266693-1270686	TAS1R3;ENSG00000169962.4;protein_coding	hypo	unmutCLL_NBCB	0.565	0.97048	0.709242	0.879889
chr1	12686444	12686481	intergenic	NA:NA-NA	NA	hypo	unmutCLL_NBCB	0.73036	0.98667	0.923955	0.863667
chr1	1268649	1268715	promoter	chr1:1266693-1270686	TAS1R3;ENSG00000169962.4;protein_coding	hypo	unmutCLL_NBCB	0.6614	0.98972	0.95044	0.9882
chr1	1283098	1283145	promoter	chr1:1270655-1284730	DVL1;ENSG00000107404.13;protein_coding	hypo	unmutCLL_NBCB	0.60121	0.99467	0.821364	0.994833
chr1	13789585	13789598	intergenic	NA:NA-NA	NA	hypo	unmutCLL_NBCB	0.66857	0.959	0.830545	0.936667
chr1	14037434	14037471	genebody	chr1:14026692-14151574	PRDM2;ENSG00000116731.18;protein_coding	hypo	unmutCLL_NBCB	0.74577	1	0.865583	1
chr1	145595519	145595651	genebody	chr1:145592604-145611025	POLR3C;ENSG00000186141.4;protein_coding	hypo	unmutCLL_NBCB	0.67301	0.99156	0.8925	0.993
chr1	147263477	147263566	intergenic	NA:NA-NA	NA	hypo	unmutCLL_NBCB	0.7107	0.98622	0.752364	0.873667
chr1	14783295	14783372	intergenic	NA:NA-NA	NA	hypo	unmutCLL_NBCB	0.6723	0.97933	0.800273	0.910333
chr1	14948950	14948967	genebody	chr1:14925199-15444539	KAZN;ENSG00000189337.11;protein_coding	hypo	unmutCLL_NBCB	0.5261	0.99867	0.537458	0.978167
chr1	150147010	150147047	intergenic	NA:NA-NA	NA	hypo	unmutCLL_NBCB	0.73223	0.99956	0.8185	0.9035
chr1	15038317	15038412	genebody	chr1:14925199-15444539	KAZN;ENSG00000189337.11;protein_coding	hypo	unmutCLL_NBCB	0.7358	0.99711	0.814818	0.916167
chr1	150844591	150844634	genebody	chr1:150782180-150849244	ARNT;ENSG00000143437.16;protein_coding	hypo	unmutCLL_NBCB	0.74729	0.99867	0.95975	0.993667
chr1	151176811	151176931	genebody	chr1:151170424-151222012	PIP5K1A;ENSG00000143398.15;protein_coding	hypo	unmutCLL_NBCB	0.53621	0.9995	0.721909	0.946556
chr1	151506503	151506591	genebody	chr1:151482985-151511168	CGN;ENSG00000143375.10;protein_coding	hypo	unmutCLL_NBCB	0.44566	0.9916	0.734864	0.93625
chr1	151506569	151506591	genebody	chr1:151482985-151511168	CGN;ENSG00000143375.10;protein_coding	hypo	mutCLL_MBC	0.2784	0.991167	0.56159	0.90644
chr1	151688483	151688519	genebody,promoter	chr1:151674879-151689290,chr1:151682908-151702070,chr1:151682908-151702281	AL589765.1;ENSG00000240510.2;protein_coding,CELF3;ENSG00000159409.10;protein_coding,RIIAD1;ENSG00000178796.8;protein_coding	hypo	unmutCLL_NBCB	0.60393	0.85989	0.840182	0.901833
chr1	15228246	15228322	genebody	chr1:14925199-15444539	KAZN;ENSG00000189337.11;protein_coding	hypo	unmutCLL_NBCB	0.6913	0.97844	0.609583	0.864833
chr1	15229874	15230008	genebody	chr1:14925199-15444539	KAZN;ENSG00000189337.11;protein_coding	hypo	unmutCLL_NBCB	0.62652	0.89767	0.68655	0.897167
chr1	152477320	152477428	intergenic	NA:NA-NA	NA	hypo	unmutCLL_NBCB	0.5952	0.979	0.837455	0.847667
chr1	15308591	15308696	genebody	chr1:14925199-15444539	KAZN;ENSG00000189337.11;protein_coding	hypo	unmutCLL_NBCB	0.70659	0.9895	0.767848	0.940778
chr1	153843701	153843819	genebody	chr1:153777200-153895451	GATAD2B;ENSG00000143614.7;protein_coding	hypo	unmutCLL_NBCB	0.7192	0.99256	0.889636	0.956333
chr1	153856568	153856632	genebody	chr1:153777200-153895451	GATAD2B;ENSG00000143614.7;protein_coding	hypo	mutCLL_MBC	0.679071	0.962333	0.68933	0.94522
chr1	153877705	153877776	genebody	chr1:153777200-153895451	GATAD2B;ENSG00000143614.7;protein_coding	hypo	unmutCLL_NBCB	0.73015	0.99344	0.816	0.985
chr1	154346101	154346148	intergenic	NA:NA-NA	NA	hypo	unmutCLL_NBCB	0.69673	0.98833	0.847	0.963833
chr1	154409703	154409818	genebody	chr1:154377668-154441926	IL6R;ENSG00000160712.8;protein_coding	hypo	unmutCLL_NBCB	0.67784	0.99617	0.740633	0.966111
chr1	154493259	154493373	genebody	chr1:154474694-154520623	TDRD10;ENSG00000163239.8;protein_coding	hypo	mutCLL_MBC,unmutCLL_NBCB	0.34632	1	0.41788	0.91711
chr1	154681770	154681818	genebody	chr1:154669930-154842756	KCNN3;ENSG00000143603.14;protein_coding	hypo	unmutCLL_NBCB	0.70545	0.98822	0.820778	0.917
chr1	154851313	154851439	intergenic	NA:NA-NA	NA	hypo	unmutCLL_NBCB	0.3797	0.67011	0.487455	0.570667
chr1	154981749	154981898	genebody	chr1:154975126-154990998	ZBTB7B;ENSG00000160685.9;protein_coding	hypo	unmutCLL_NBCB	0.55972	0.99	0.752527	0.976533
chr1	155412099	155412229	genebody	chr1:155305058-155532598	ASH1L;ENSG00000116539.6;protein_coding	hypo	mutCLL_MBC	0.23825	0.987583	0.47777	0.97773
chr1	155412114	155412229	genebody	chr1:155305058-155532598	ASH1L;ENSG00000116539.6;protein_coding	hypo	unmutCLL_NBCB	0.24535	0.99325	0.519333	0.994444
chr1	156327684	156327730	genebody	chr1:156278758-156337664	CCT3;ENSG00000163468.10;protein_coding	hypo	unmutCLL_NBCB	0.57603	0.97	0.743812	0.892833
chr1	1564136	1564146	genebody,promoter	chr1:1550794-1565990,chr1:1567473-1570639	MIB2;ENSG00000197530.8;protein_coding,MMP23B;ENSG00000189409.8;protein_coding	hypo	unmutCLL_NBCB	0.65126	0.978	0.640409	0.891
chr1	156483103	156483184	intergenic	NA:NA-NA	NA	hypo	unmutCLL_NBCB	0.5551	0.997	0.754636	0.922833
chr1	157660283	157660310	genebody,promoter	chr1:157644110-157670647,chr1:157661551-157666249	FCRL3;ENSG00000160856.16;protein_coding,RP11-367J7.3;ENSG00000227217.1;antisense	hypo	mutCLL_MBC	0.6447	1	0.61213	0.95856
chr1	15767058	15767119	promoter	chr1:15764934-15775737	CTRC;ENSG00000162438.7;protein_coding	hypo	unmutCLL_NBCB	0.69333	0.98875	0.825542	0.927778
chr1	158328138	158328184	intergenic	NA:NA-NA	NA	hypo	unmutCLL_NBCB	0.52563	0.85822	0.785944	0.9965
chr1	15865899	15865975	genebody,promoter	chr1:15853307-15918874,chr1:15868659-15868799	DNAJC16;ENSG00000116138.8;protein_coding,SCARNA21;ENSG00000251866.1;snoRNA	hypo	mutCLL_MBC,unmutCLL_NBCB	0.66462	0.99983	0.69482	0.99633
chr1	15946200	15946304	promoter	chr1:15943994-15995539	DDI2;ENSG00000197312.7;protein_coding	hypo	unmutCLL_NBCB	0.72398	1	0.918762	0.974583
chr1	15952258	15952406	genebody	chr1:15943994-15995539	DDI2;ENSG00000197312.7;protein_coding	hypo	unmutCLL_NBCB	0.72722	0.99871	0.839986	0.962625
chr1	161194644	161194657	promoter	chr1:161192081-161193421,chr1:161195792-161200408,chr1:161196975-161197051	APOA2;ENSG00000158874.7;protein_coding,MIR5187;ENSG00000263548.1;miRNA,TOMM40L;ENSG00000158882.8;protein_coding	hypo	mutCLL_MBC,unmutCLL_NBCB	0.47465	0.98489	0.56691	0.84633
chr1	1612023	1612067	genebody	chr1:1592938-1624167	SLC35E2B;ENSG00000189339.7;protein_coding	hypo	unmutCLL_NBCB	0.698	0.998	0.857	0.950833
chr1	16164927	16165075	genebody	chr1:16160559-16174642	RP11-169K16.9;ENSG00000179743.2;antisense	hypo	mutCLL_MBC,unmutCLL_NBCB	0.59733	0.99522	0.68701	0.97144
chr1	162583964	162583977	intergenic	NA:NA-NA	NA	hypo	unmutCLL_NBCB	0.6991	0.95611	0.971773	0.989667
chr1	16268533	16268589	genebody	chr1:16268363-16302627	ZBTB17;ENSG00000116809.7;protein_coding	hypo	unmutCLL_NBCB	0.7149	0.98822	0.894055	0.978067
chr1	16273504	16273586	genebody	chr1:16268363-16302627	ZBTB17;ENSG00000116809.7;protein_coding	hypo	unmutCLL_NBCB	0.32955	0.9965	0.650417	0.921444
chr1	16283395	16283485	genebody	chr1:16268363-16302627	ZBTB17;ENSG00000116809.7;protein_coding	hypo	unmutCLL_NBCB	0.30736	1	0.719468	0.994333
chr1	16283411	16283485	genebody	chr1:16268363-16302627	ZBTB17;ENSG00000116809.7;protein_coding	hypo	mutCLL_MBC	0.238025	1	0.63938	0.99407
chr1	16289269	16289327	genebody	chr1:16268363-16302627	ZBTB17;ENSG00000116809.7;protein_coding	hypo	mutCLL_MBC	0.3802	0.977	0.54804	0.88567
chr1	16441516	16441579	intergenic	NA:NA-NA	NA	hypo	unmutCLL_NBCB	0.45652	0.99622	0.79335	0.9815
chr1	16493583	16493657	intergenic	NA:NA-NA	NA	hypo	unmutCLL_NBCB	0.67101	0.99233	0.871152	0.971556
chr1	166294661	166294704	intergenic	NA:NA-NA	NA	hypo	mutCLL_MBC	0.6485	0.981833	0.53121	0.80522
chr1	166315586	166315630	intergenic	NA:NA-NA	NA	hypo	unmutCLL_NBCB	0.63577	0.99956	0.5025	0.977167
chr1	167460525	167460602	genebody	chr1:167399876-167487847	CD247;ENSG00000198821.6;protein_coding	hypo	unmutCLL_NBCB	0.67285	0.99487	0.786189	0.919
chr1	16938738	16938779	promoter	chr1:16888813-16940057	NBPF1;ENSG00000219481.6;protein_coding	hypo	unmutCLL_NBCB	0.72377	0.98089	0.775182	0.938667
chr1	1695794	1695816	genebody	chr1:1682670-1711896	NADK;ENSG00000008130.11;protein_coding	hypo	unmutCLL_NBCB	0.69747	0.99733	0.823	0.994
chr1	1696079	1696195	genebody	chr1:1682670-1711896	NADK;ENSG00000008130.11;protein_coding	hypo	unmutCLL_NBCB	0.6732	0.99527	0.732939	0.96225
chr1	17195031	17195125	genebody,promoter	chr1:17066767-17299474,chr1:17197439-17200587	CROCC;ENSG00000058453.12;protein_coding,U1;ENSG00000228549.2;lincRNA	hypo	mutCLL_MBC,unmutCLL_NBCB	0.37002	0.99058	0.59091	0.96942
chr1	174080864	174081024	intergenic	NA:NA-NA	NA	hypo	unmutCLL_NBCB	0.74294	0.99975	0.756333	0.898222
chr1	174125241	174125280	genebody,promoter	chr1:174084437-174129142,chr1:174128547-174964445	RABGAP1L;ENSG00000152061.17;protein_coding,RP11-160H22.5;ENSG00000227373.1;lincRNA	hypo	unmutCLL_NBCB	0.67803	0.98911	0.94095	0.966333
chr1	17431486	17431513	genebody	chr1:17393255-17445948	PADI2;ENSG00000117115.8;protein_coding	hypo	mutCLL_MBC,unmutCLL_NBCB	0.23757	0.97189	0.66882	0.94444
chr1	17558065	17558109	genebody	chr1:17531620-17572500	PADI1;ENSG00000142623.8;protein_coding	hypo	unmutCLL_NBCB	0.30113	0.99389	0.612	0.908667
chr1	178735475	178735514	genebody	chr1:178694299-178889238	RALGPS2;ENSG00000116191.13;protein_coding	hypo	mutCLL_MBC	0.75145	0.9855	0.69985	0.98511
chr1	181013339	181013389	genebody	chr1:181003066-181031074	MR1;ENSG00000153029.10;protein_coding	hypo	mutCLL_MBC	0.934328	0.997667	0.72313	0.99567
chr1	181504914	181504982	genebody	chr1:181382237-181777219	CACNA1E;ENSG00000198216.6;protein_coding	hypo	unmutCLL_NBCB	0.72545	0.98456	0.727773	0.936833
chr1	182759964	182760019	promoter	chr1:182758427-182799519	NPL;ENSG00000135838.9;protein_coding	hypo	unmutCLL_NBCB	0.71963	0.98911	0.710591	0.903
chr1	183184434	183184486	genebody	chr1:183155372-183214035	LAMC2;ENSG00000058085.10;protein_coding	hypo	unmutCLL_NBCB	0.28072	0.95678	0.75235	0.888333
chr1	183567209	183567301	genebody	chr1:183441350-183567381	SMG7;ENSG00000116698.16;protein_coding	hypo	unmutCLL_NBCB	0.36656	0.991	0.819409	0.999833
chr1	184774141	184774216	genebody	chr1:184759857-184943682	FAM129A;ENSG00000135842.12;protein_coding	hypo	mutCLL_MBC,unmutCLL_NBCB	0.6208	0.994	0.6287	0.99433
chr1	185423821	185423869	intergenic	NA:NA-NA	NA	hypo	unmutCLL_NBCB	0.6872	0.98744	0.8362	0.974167
chr1	189108878	189108993	intergenic	NA:NA-NA	NA	hypo	unmutCLL_NBCB	0.72818	0.9905	0.877591	0.975133
chr1	19274047	19274108	genebody	chr1:19230774-19283180	IFFO2;ENSG00000169991.6;protein_coding	hypo	unmutCLL_NBCB	0.56708	0.95047	0.821144	0.926833
chr1	19398385	19398460	intergenic	NA:NA-NA	NA	hypo	unmutCLL_NBCB	0.67587	0.98117	0.857714	0.933111
chr1	194997496	194997556	intergenic	NA:NA-NA	NA	hypo	unmutCLL_NBCB	0.68117	0.98911	0.770227	0.911333
chr1	1988606	1988766	genebody	chr1:1981908-2116834	PRKCZ;ENSG00000067606.11;protein_coding	hypo	unmutCLL_NBCB	0.67102	0.99594	0.846673	0.942133
chr1	199135275	199135330	genebody	chr1:199117725-199362435	RP11-382E9.1;ENSG00000231718.1;lincRNA	hypo	unmutCLL_NBCB	0.64357	0.99722	0.669773	0.9445
chr1	199168640	199168750	genebody,promoter	chr1:199117725-199362435,chr1:199166207-199166312	AC105941.1;ENSG00000239006.1;miRNA,RP11-382E9.1;ENSG00000231718.1;lincRNA	hypo	unmutCLL_NBCB	0.71868	0.98967	0.824545	0.947667
chr1	201195152	201195212	genebody,promoter	chr1:201159952-201198080,chr1:201191240-201192251	IGFN1;ENSG00000163395.12;protein_coding,RP11-567E21.3;ENSG00000229821.1;antisense	hypo	unmutCLL_NBCB	0.68299	0.94633	0.833909	0.850667
chr1	201360825	201360897	genebody	chr1:201342371-201368736	LAD1;ENSG00000159166.9;protein_coding	hypo	unmutCLL_NBCB	0.73763	0.99644	0.879955	0.943667
chr1	2016740	2016788	genebody	chr1:1981908-2116834	PRKCZ;ENSG00000067606.11;protein_coding	hypo	unmutCLL_NBCB	0.6332	0.98611	0.793727	0.918167
chr1	201684015	201684120	genebody,promoter	chr1:201592410-201796102,chr1:201657386-201798687,chr1:201688635-201688755	IPO9-AS1;ENSG00000231871.1;antisense,MIR5191;ENSG00000264802.1;miRNA,NAV1;ENSG00000134369.11;protein_coding	hypo	unmutCLL_NBCB	0.70719	0.97778	0.90805	0.9575
chr1	202186166	202186253	genebody	chr1:202163028-202288909	LGR6;ENSG00000133067.13;protein_coding	hypo	unmutCLL_NBCB	0.69687	0.95922	0.811318	0.851833
chr1	203570379	203570487	intergenic	NA:NA-NA	NA	hypo	unmutCLL_NBCB	0.68325	0.94433	0.792682	0.886333
chr1	203578256	203578391	intergenic	NA:NA-NA	NA	hypo	unmutCLL_NBCB	0.74012	0.99472	0.793852	0.8988
chr1	203601614	203601631	genebody	chr1:203595688-203713209	ATP2B4;ENSG00000058668.10;protein_coding	hypo	unmutCLL_NBCB	0.6826	0.97611	0.746833	0.948667
chr1	203811247	203811280	genebody	chr1:203764781-203823252	ZC3H11A;ENSG00000058673.11;protein_coding	hypo	mutCLL_MBC,unmutCLL_NBCB	0.6727	0.98578	0.67394	0.97056
chr1	2038437	2038461	genebody	chr1:1981908-2116834	PRKCZ;ENSG00000067606.11;protein_coding	hypo	mutCLL_MBC	0.1551	0.984167	0.625	0.96578
chr1	2046521	2046825	genebody	chr1:1981908-2116834	PRKCZ;ENSG00000067606.11;protein_coding	hypo	mutCLL_MBC,unmutCLL_NBCB	0.45501	0.98528	0.67417	0.9611
chr1	205226420	205226500	genebody	chr1:205197303-205242471	TMCC2;ENSG00000133069.10;protein_coding	hypo	unmutCLL_NBCB	0.71359	0.99478	0.799573	0.941889
chr1	205248831	205248965	intergenic	NA:NA-NA	NA	hypo	unmutCLL_NBCB	0.69656	0.9946	0.7966	0.977167
chr1	205555146	205555272	genebody	chr1:205538012-205572046	MFSD4;ENSG00000174514.8;protein_coding	hypo	unmutCLL_NBCB	0.72161	0.99525	0.788061	0.972444
chr1	205594594	205594659	genebody	chr1:205577070-205601090	ELK4;ENSG00000158711.9;protein_coding	hypo	unmutCLL_NBCB	0.73872	0.98987	0.846109	0.948417
chr1	2057316	2057367	genebody	chr1:1981908-2116834	PRKCZ;ENSG00000067606.11;protein_coding	hypo	unmutCLL_NBCB	0.68607	0.95567	0.804091	0.923167
chr1	2062623	2062764	genebody	chr1:1981908-2116834	PRKCZ;ENSG00000067606.11;protein_coding	hypo	unmutCLL_NBCB	0.56123	0.995	0.796939	0.915556
chr1	206708283	206708420	genebody	chr1:206680878-206762616	RASSF5;ENSG00000136653.15;protein_coding	hypo	unmutCLL_NBCB	0.68783	0.9886	0.77228	0.914583
chr1	206712590	206712714	genebody	chr1:206680878-206762616	RASSF5;ENSG00000136653.15;protein_coding	hypo	unmutCLL_NBCB	0.7449	0.99778	0.863591	0.983833
chr1	206757768	206757796	genebody	chr1:206680878-206762616,chr1:206744619-206785904	EIF2D;ENSG00000143486.11;protein_coding,RASSF5;ENSG00000136653.15;protein_coding	hypo	unmutCLL_NBCB	0.6262	0.98756	0.90015	0.9795
chr1	2069451	2069492	genebody	chr1:1981908-2116834	PRKCZ;ENSG00000067606.11;protein_coding	hypo	unmutCLL_NBCB	0.56586	0.98873	0.824108	0.9755
chr1	208000200	208000380	genebody	chr1:207974862-208042495	C1orf132;ENSG00000203709.5;processed_transcript	hypo	unmutCLL_NBCB	0.66142	0.96214	0.785464	0.958056
chr1	2090682	2090744	genebody	chr1:1981908-2116834	PRKCZ;ENSG00000067606.11;protein_coding	hypo	mutCLL_MBC	0.409317	0.997611	0.5951	0.97605
chr1	20947315	20947356	intergenic	NA:NA-NA	NA	hypo	unmutCLL_NBCB	0.72455	0.99189	0.821125	0.848167
chr1	209926102	209926157	promoter	chr1:209929376-209955668	TRAF3IP3;ENSG00000009790.10;protein_coding	hypo	unmutCLL_NBCB	0.6058	0.96556	0.85495	0.967167
chr1	2105471	2105493	genebody	chr1:1981908-2116834	PRKCZ;ENSG00000067606.11;protein_coding	hypo	unmutCLL_NBCB	0.68014	0.969	0.785	0.840333
chr1	2106132	2106212	genebody	chr1:1981908-2116834	PRKCZ;ENSG00000067606.11;protein_coding	hypo	mutCLL_MBC,unmutCLL_NBCB	0.072233	0.71167	0.33188	0.71978
chr1	212762473	212762520	genebody	chr1:212738675-212794119	ATF3;ENSG00000162772.12;protein_coding	hypo	unmutCLL_NBCB	0.71346	0.99422	0.874909	0.957833
chr1	213869590	213869714	intergenic	NA:NA-NA	NA	hypo	unmutCLL_NBCB	0.68823	0.96878	0.805735	0.9255
chr1	214001791	214001855	genebody	chr1:213991093-214160973	PROX1-AS1;ENSG00000230461.4;antisense	hypo	unmutCLL_NBCB	0.70561	0.98022	0.76155	0.939167
chr1	214169815	214169911	genebody	chr1:214156523-214214595	PROX1;ENSG00000117707.11;protein_coding	hypo	unmutCLL_NBCB	0.71955	0.99267	0.735121	0.894778
chr1	214781992	214782032	genebody	chr1:214776537-214837931	CENPF;ENSG00000117724.8;protein_coding	hypo	mutCLL_MBC,unmutCLL_NBCB	0.71485	0.9954	0.63595	0.9944
chr1	21565705	21565754	genebody	chr1:21543739-21671997	ECE1;ENSG00000117298.10;protein_coding	hypo	unmutCLL_NBCB	0.73393	0.99022	0.8434	0.902
chr1	21589333	21589449	genebody,promoter	chr1:21543739-21671997,chr1:21592574-21593744	ECE1;ENSG00000117298.10;protein_coding,RP3-329E20.2;ENSG00000236936.1;antisense	hypo	unmutCLL_NBCB	0.6941	0.98727	0.770742	0.95925
chr1	2168637	2168685	genebody	chr1:2160133-2241558	SKI;ENSG00000157933.9;protein_coding	hypo	unmutCLL_NBCB	0.7295	0.98822	0.786182	0.977
chr1	2179496	2179519	genebody	chr1:2160133-2241558	SKI;ENSG00000157933.9;protein_coding	hypo	mutCLL_MBC,unmutCLL_NBCB	0.1842	0.98367	0.53225	0.87656
chr1	2179681	2179830	genebody	chr1:2160133-2241558	SKI;ENSG00000157933.9;protein_coding	hypo	unmutCLL_NBCB	0.55294	0.998	0.817394	0.946611
chr1	218225987	218226004	genebody	chr1:218216846-218232482	RP11-152L7.2;ENSG00000232100.1;lincRNA	hypo	unmutCLL_NBCB	0.67526	0.97642	0.818167	0.965111
chr1	218799858	218799908	intergenic	NA:NA-NA	NA	hypo	unmutCLL_NBCB	0.7156	0.991	0.9413	0.9805
chr1	2202026	2202060	genebody	chr1:2160133-2241558	SKI;ENSG00000157933.9;protein_coding	hypo	unmutCLL_NBCB	0.70443	0.989	0.864267	0.970556
chr1	2206973	2207037	genebody	chr1:2160133-2241558	SKI;ENSG00000157933.9;protein_coding	hypo	mutCLL_MBC	0.301292	0.990778	0.64628	0.98767
chr1	2207011	2207037	genebody	chr1:2160133-2241558	SKI;ENSG00000157933.9;protein_coding	hypo	unmutCLL_NBCB	0.27015	0.98792	0.631939	0.981889
chr1	220721888	220721940	genebody	chr1:220701567-220837803	MARK1;ENSG00000116141.11;protein_coding	hypo	unmutCLL_NBCB	0.63078	0.97656	0.870136	0.971167
chr1	220863889	220863942	promoter	chr1:220863186-220872499	C1orf115;ENSG00000162817.6;protein_coding	hyper	unmutCLL_NBCB	0.29325	0.018242	0.245572	0.0733333
chr1	2220495	2220674	genebody	chr1:2160133-2241558	SKI;ENSG00000157933.9;protein_coding	hypo	unmutCLL_NBCB	0.54199	0.93567	0.634455	0.8425
chr1	222417989	222418129	genebody	chr1:222262510-222560776	RP11-400N13.1;ENSG00000236230.1;lincRNA	hypo	unmutCLL_NBCB	0.67046	0.96942	0.810394	0.935111
chr1	222484365	222484444	genebody	chr1:222262510-222560776	RP11-400N13.1;ENSG00000236230.1;lincRNA	hypo	unmutCLL_NBCB	0.66352	0.947	0.801773	0.865167
chr1	2230345	2230452	genebody	chr1:2160133-2241558	SKI;ENSG00000157933.9;protein_coding	hypo	mutCLL_MBC,unmutCLL_NBCB	0.47017	0.98033	0.62569	0.89744
chr1	223405187	223405210	genebody	chr1:223394160-223537544	SUSD4;ENSG00000143502.10;protein_coding	hypo	mutCLL_MBC	0.8069	1	0.69146	0.96056
chr1	223430257	223430314	genebody	chr1:223394160-223537544	SUSD4;ENSG00000143502.10;protein_coding	hypo	unmutCLL_NBCB	0.73623	0.997	0.86375	0.961833
chr1	2234716	2234779	genebody	chr1:2160133-2241558	SKI;ENSG00000157933.9;protein_coding	hypo	unmutCLL_NBCB	0.67655	0.99193	0.834075	0.995
chr1	22387668	22387696	genebody,promoter	chr1:22379119-22419437,chr1:22385689-22390692	CDC42-IT1;ENSG00000230068.2;sense_intronic,CDC42;ENSG00000070831.11;protein_coding	hypo	mutCLL_MBC,unmutCLL_NBCB	0.58037	0.99544	0.58906	0.848
chr1	22446519	22446582	genebody	chr1:22443797-22470462	WNT4;ENSG00000162552.10;protein_coding	hypo	unmutCLL_NBCB	0.71679	0.98738	0.908348	0.996333
chr1	22453096	22453181	genebody	chr1:22443797-22470462	WNT4;ENSG00000162552.10;protein_coding	hypo	unmutCLL_NBCB	0.47997	0.983	0.81847	0.931
chr1	224562341	224562386	genebody	chr1:224544551-224567161	CNIH4;ENSG00000143771.7;protein_coding	hypo	unmutCLL_NBCB	0.70023	0.99144	0.824636	0.9815
chr1	22460320	22460341	genebody	chr1:22443797-22470462	WNT4;ENSG00000162552.10;protein_coding	hypo	unmutCLL_NBCB	0.63316	0.94222	0.742136	0.8265
chr1	224944983	224945025	intergenic	NA:NA-NA	NA	hypo	unmutCLL_NBCB	0.55448	0.95844	0.92645	0.995833
chr1	225461037	225461056	genebody	chr1:225083963-225586996	DNAH14;ENSG00000185842.10;protein_coding	hypo	mutCLL_MBC	0.58835	1	0.676	0.97122
chr1	226090720	226090813	genebody	chr1:226073981-226099082,chr1:226074395-226111978	LEFTY1;ENSG00000243709.1;protein_coding,RP4-559A3.7;ENSG00000255835.1;protein_coding	hypo	unmutCLL_NBCB	0.72473	0.99411	0.809545	0.937167
chr1	226123434	226123509	promoter	chr1:226124110-226125257	RP4-559A3.6;ENSG00000248322.1;sense_overlapping	hypo	unmutCLL_NBCB	0.72628	0.99167	0.8784	0.935
chr1	226258210	226258341	genebody	chr1:226249551-226259702	H3F3A;ENSG00000163041.5;protein_coding	hypo	unmutCLL_NBCB	0.64294	0.98744	0.715958	0.911333
chr1	226322890	226322973	intergenic	NA:NA-NA	NA	hypo	unmutCLL_NBCB	0.65552	0.95533	0.897417	0.992667
chr1	226369651	226369710	genebody	chr1:226332379-226374431	ACBD3;ENSG00000182827.8;protein_coding	hypo	unmutCLL_NBCB	0.65092	0.99525	0.656667	0.899222
chr1	226822649	226822742	genebody	chr1:226819390-226927024	ITPKB;ENSG00000143772.5;protein_coding	hypo	unmutCLL_NBCB	0.52511	0.99822	0.751788	0.9665
chr1	226913443	226913526	genebody	chr1:226819390-226927024	ITPKB;ENSG00000143772.5;protein_coding	hypo	unmutCLL_NBCB	0.63247	0.99206	0.650368	0.9744
chr1	226913455	226913503	genebody	chr1:226819390-226927024	ITPKB;ENSG00000143772.5;protein_coding	hypo	mutCLL_MBC	0.42315	0.995833	0.50848	0.95733
chr1	226935474	226935624	intergenic	NA:NA-NA	NA	hypo	unmutCLL_NBCB	0.59482	0.99767	0.778082	0.985833
chr1	226972431	226972558	intergenic	NA:NA-NA	NA	hypo	unmutCLL_NBCB	0.58598	0.98444	0.791455	0.965667
chr1	227173151	227173192	genebody	chr1:227085236-227175246	ADCK3;ENSG00000163050.12;protein_coding	hypo	unmutCLL_NBCB	0.37833	0.99733	0.730227	0.9365
chr1	227939699	227939744	genebody,promoter	chr1:227916239-227968927,chr1:227931531-227934892	SNAP47-AS1;ENSG00000230005.2;antisense,SNAP47;ENSG00000143740.10;protein_coding	hypo	unmutCLL_NBCB	0.72052	0.98378	0.683545	0.948
chr1	228110556	228110640	genebody	chr1:228106356-228135599	WNT9A;ENSG00000143816.7;protein_coding	hypo	unmutCLL_NBCB	0.68507	0.97208	0.863	0.954222
chr1	228354538	228354568	promoter	chr1:228351786-228353213,chr1:228353515-228369958	IBA57-AS1;ENSG00000203684.5;protein_coding,IBA57;ENSG00000181873.8;protein_coding	hypo	unmutCLL_NBCB	0.59513	0.94011	0.789333	0.881111
chr1	229713282	229713418	intergenic	NA:NA-NA	NA	hypo	mutCLL_MBC,unmutCLL_NBCB	0.51557	0.99876	0.65718	0.96076
chr1	230290049	230290110	genebody	chr1:230193535-230417870	GALNT2;ENSG00000143641.8;protein_coding	hypo	unmutCLL_NBCB	0.56247	0.99156	0.928273	0.892167
chr1	230417412	230417439	genebody,promoter	chr1:230193535-230417870,chr1:230416057-230417639	GALNT2;ENSG00000143641.8;protein_coding,RP5-956O18.3;ENSG00000224407.1;antisense	hypo	unmutCLL_NBCB	0.40311	0.99811	0.968643	0.988167
chr1	230445820	230445954	intergenic	NA:NA-NA	NA	hypo	unmutCLL_NBCB	0.61268	0.9256	0.832075	0.94225
chr1	232483751	232483827	intergenic	NA:NA-NA	NA	hypo	unmutCLL_NBCB	0.68141	0.99856	0.861045	0.987667
chr1	232485514	232485602	intergenic	NA:NA-NA	NA	hypo	unmutCLL_NBCB	0.62601	0.97833	0.779636	0.885
chr1	233835175	233835188	intergenic	NA:NA-NA	NA	hypo	mutCLL_MBC	0.70245	1	0.74905	1
chr1	23440094	23440286	genebody	chr1:23410515-23504301	LUZP1;ENSG00000169641.9;protein_coding	hypo	mutCLL_MBC,unmutCLL_NBCB	0.086811	0.99344	0.43034	0.96947
chr1	234797048	234797204	genebody,promoter	chr1:234782034-234818922,chr1:234796016-234802850	RP4-781K5.4;ENSG00000228044.2;lincRNA,RP4-781K5.5;ENSG00000241475.1;lincRNA	hypo	unmutCLL_NBCB	0.68572	0.99708	0.779636	0.914778
chr1	234851926	234851959	genebody	chr1:234845134-234855723	RP4-781K5.7;ENSG00000224037.2;lincRNA	hypo	unmutCLL_NBCB	0.71877	0.99678	0.859409	0.953
chr1	234870780	234870810	intergenic	NA:NA-NA	NA	hypo	unmutCLL_NBCB	0.58077	0.97767	0.531208	0.936333
chr1	234873498	234873567	intergenic	NA:NA-NA	NA	hypo	unmutCLL_NBCB	0.2919	0.98422	0.677864	0.954333
chr1	235587061	235587206	genebody	chr1:235530674-235612283,chr1:235582829-235590298	RP11-293G6__A.2;ENSG00000243533.2;antisense,TBCE;ENSG00000116957.8;protein_coding	hypo	unmutCLL_NBCB	0.69624	0.9875	0.879311	0.980444
chr1	236032536	236032553	genebody	chr1:235824340-236046940	LYST;ENSG00000143669.9;protein_coding	hypo	unmutCLL_NBCB	0.69204	0.99278	0.758312	0.992667
chr1	236280679	236280694	intergenic	NA:NA-NA	NA	hypo	mutCLL_MBC	0.7258	0.9925	0.63418	0.91078
chr1	23906254	23906316	promoter	chr1:23907984-23967058	MDS2;ENSG00000197880.4;protein_coding	hypo	unmutCLL_NBCB	0.71822	0.98589	0.815591	0.9705
chr1	23949610	23949846	genebody	chr1:23907984-23967058	MDS2;ENSG00000197880.4;protein_coding	hypo	unmutCLL_NBCB	0.5124	0.99121	0.583462	0.97925
chr1	23949739	23949846	genebody	chr1:23907984-23967058	MDS2;ENSG00000197880.4;protein_coding	hypo	mutCLL_MBC	0.47874	0.999917	0.54096	0.97393
chr1	244058962	244059084	intergenic	NA:NA-NA	NA	hypo	unmutCLL_NBCB	0.63273	0.97578	0.816727	0.861667
chr1	244260027	244260113	promoter	chr1:244232121-244256328	RP11-278H7.4;ENSG00000229960.1;lincRNA	hypo	unmutCLL_NBCB	0.59833	0.99627	0.740795	0.951417
chr1	244892611	244892682	intergenic	NA:NA-NA	NA	hypo	unmutCLL_NBCB	0.64798	0.96422	0.688591	0.843667
chr1	247535189	247535233	intergenic	NA:NA-NA	NA	hypo	unmutCLL_NBCB	0.71	0.988	0.847727	0.927833
chr1	247535754	247535768	intergenic	NA:NA-NA	NA	hypo	unmutCLL_NBCB	0.51657	0.97833	0.732045	0.886
chr1	25070899	25070919	promoter	chr1:25071847-25170815	CLIC4;ENSG00000169504.10;protein_coding	hypo	mutCLL_MBC	0.280275	0.9845	0.52996	0.82587
chr1	25297127	25297213	promoter	chr1:25294913-25297356	RP11-84D1.2;ENSG00000261025.1;lincRNA	hypo	unmutCLL_NBCB	0.65005	0.99547	0.877245	0.966
chr1	25308278	25308385	intergenic	NA:NA-NA	NA	hypo	mutCLL_MBC,unmutCLL_NBCB	0.070478	0.98	0.072656	0.9275
chr1	25326980	25327031	intergenic	NA:NA-NA	NA	hypo	mutCLL_MBC	0.22615	0.991333	0.30979	0.921
chr1	25392460	25392498	genebody	chr1:25370197-25439611	RP4-799D16.1;ENSG00000233755.1;lincRNA	hypo	unmutCLL_NBCB	0.43533	0.857	0.70019	0.884889
chr1	25560991	25561008	promoter	chr1:25549169-25558993	SYF2;ENSG00000117614.5;protein_coding	hypo	unmutCLL_NBCB	0.66123	0.99122	0.693455	0.852167
chr1	26026361	26026437	genebody	chr1:25943958-26112698	MAN1C1;ENSG00000117643.10;protein_coding	hypo	unmutCLL_NBCB	0.65209	0.98456	0.860056	0.911333
chr1	26136821	26136898	genebody,promoter	chr1:26126666-26144713,chr1:26137960-26150235	RP1-317E23.6;ENSG00000255054.3;protein_coding,SEPN1;ENSG00000162430.12;protein_coding	hypo	unmutCLL_NBCB	0.51566	0.98778	0.867136	0.972
chr1	26609306	26609405	genebody	chr1:26607818-26644854	UBXN11;ENSG00000158062.16;protein_coding	hypo	mutCLL_MBC,unmutCLL_NBCB	0.59373	0.99386	0.70436	0.97695
chr1	26634530	26634612	genebody	chr1:26607818-26644854	UBXN11;ENSG00000158062.16;protein_coding	hypo	mutCLL_MBC	0.704917	0.992583	0.61149	0.948
chr1	27846474	27846494	intergenic	NA:NA-NA	NA	hypo	unmutCLL_NBCB	0.69856	0.99256	0.843417	0.985
chr1	27888707	27888846	genebody	chr1:27860545-27930942	AHDC1;ENSG00000126705.9;protein_coding	hypo	unmutCLL_NBCB	0.71894	0.99187	0.825686	0.946519
chr1	2809243	2809308	intergenic	NA:NA-NA	NA	hypo	unmutCLL_NBCB	0.68513	0.98844	0.866045	0.995667
chr1	29058384	29058415	promoter	chr1:29063132-29096287	YTHDF2;ENSG00000198492.10;protein_coding	hypo	unmutCLL_NBCB	0.70845	0.98711	0.9038	0.932333
chr1	29357540	29357615	genebody	chr1:29213602-29446553	EPB41;ENSG00000159023.14;protein_coding	hypo	unmutCLL_NBCB	0.73572	0.99933	0.740303	0.992944
chr1	29516757	29516791	intergenic	NA:NA-NA	NA	hypo	unmutCLL_NBCB	0.72386	0.98489	0.850417	0.987667
chr1	29532058	29532080	genebody	chr1:29519384-29557454	MECR;ENSG00000116353.11;protein_coding	hypo	unmutCLL_NBCB	0.5057	0.99678	0.726111	0.946167
chr1	30044201	30044306	intergenic	NA:NA-NA	NA	hypo	unmutCLL_NBCB	0.69884	0.99533	0.728288	0.896
chr1	3027409	3027519	genebody	chr1:2985731-3355185	PRDM16;ENSG00000142611.12;protein_coding	hypo	unmutCLL_NBCB	0.70874	0.98573	0.874991	0.942333
chr1	3096876	3096953	genebody	chr1:2985731-3355185	PRDM16;ENSG00000142611.12;protein_coding	hypo	unmutCLL_NBCB	0.4821	0.98189	0.72655	0.964833
chr1	3138006	3138053	genebody	chr1:2985731-3355185	PRDM16;ENSG00000142611.12;protein_coding	hypo	unmutCLL_NBCB	0.64128	0.97833	0.778682	0.905833
chr1	32152483	32152537	genebody	chr1:32117847-32169920	COL16A1;ENSG00000084636.13;protein_coding	hypo	unmutCLL_NBCB	0.73357	0.99656	0.788242	0.9855
chr1	32294549	32294576	intergenic	NA:NA-NA	NA	hypo	unmutCLL_NBCB	0.71995	0.97644	0.764591	0.946
chr1	32404848	32404909	genebody	chr1:32372021-32410457	PTP4A2;ENSG00000184007.13;protein_coding	hypo	unmutCLL_NBCB	0.60398	0.99625	0.810939	0.924222
chr1	32419265	32419373	intergenic	NA:NA-NA	NA	hypo	unmutCLL_NBCB	0.6369	0.993	0.883091	0.995167
chr1	32422571	32422626	intergenic	NA:NA-NA	NA	hypo	unmutCLL_NBCB	0.62685	0.99117	0.87363	0.984444
chr1	32582864	32582933	genebody	chr1:32573638-32642169	KPNA6;ENSG00000025800.9;protein_coding	hypo	unmutCLL_NBCB	0.55629	0.96693	0.745583	0.975083
chr1	32597730	32597866	genebody	chr1:32573638-32642169	KPNA6;ENSG00000025800.9;protein_coding	hypo	unmutCLL_NBCB	0.70129	0.99017	0.924955	0.908444
chr1	32631318	32631454	genebody,promoter	chr1:32573638-32642169,chr1:32636333-32642169	KPNA6;ENSG00000025800.9;protein_coding,RP4-622L5.2;ENSG00000250135.1;sense_intronic	hypo	unmutCLL_NBCB	0.59163	0.99678	0.71185	0.999333
chr1	32733031	32733098	genebody	chr1:32716839-32751766	LCK;ENSG00000182866.12;protein_coding	hypo	mutCLL_MBC	0.273	1	0.6033	0.96567
chr1	32733076	32733098	genebody	chr1:32716839-32751766	LCK;ENSG00000182866.12;protein_coding	hypo	unmutCLL_NBCB	0.25133	0.99678	0.679545	0.979333
chr1	32755258	32755377	promoter	chr1:32752052-32752162,chr1:32757686-32799236	HDAC1;ENSG00000116478.7;protein_coding,Y_RNA;ENSG00000252450.1;misc_RNA	hypo	mutCLL_MBC,unmutCLL_NBCB	0.71954	0.99478	0.72753	0.98311
chr1	3281090	3281131	genebody	chr1:2985731-3355185	PRDM16;ENSG00000142611.12;protein_coding	hypo	unmutCLL_NBCB	0.5933	0.95011	0.659364	0.847667
chr1	33799727	33799946	genebody,promoter	chr1:33789223-33896653,chr1:33797993-33798093	MIR3605;ENSG00000266239.1;miRNA,PHC2;ENSG00000134686.12;protein_coding	hypo	unmutCLL_NBCB	0.25101	0.984	0.600614	0.973524
chr1	33804357	33804433	genebody,promoter	chr1:33789223-33896653,chr1:33802166-33802465	PHC2;ENSG00000134686.12;protein_coding,RN7SKP16;ENSG00000222112.1;misc_RNA	hypo	unmutCLL_NBCB	0.58107	0.99411	0.958833	0.987833
chr1	35749097	35749232	genebody	chr1:35734567-35887659	ZMYM4;ENSG00000146463.7;protein_coding	hypo	mutCLL_MBC,unmutCLL_NBCB	0.36188	0.99313	0.50427	0.96647
chr1	3615512	3615589	genebody	chr1:3569083-3652765	TP73;ENSG00000078900.10;protein_coding	hypo	mutCLL_MBC	0.38777	0.989533	0.63077	0.9165
chr1	3651341	3651468	genebody	chr1:3569083-3652765	TP73;ENSG00000078900.10;protein_coding	hypo	unmutCLL_NBCB	0.73232	0.99933	0.892169	0.95
chr1	36589882	36589943	promoter	chr1:36560836-36590821	COL8A2;ENSG00000171812.6;protein_coding	hypo	mutCLL_MBC	0.4656	0.934667	0.59358	0.88667
chr1	36662010	36662079	intergenic	NA:NA-NA	NA	hypo	mutCLL_MBC	0.621222	0.998	0.55221	0.9322
chr1	36662010	36662085	intergenic	NA:NA-NA	NA	hypo	unmutCLL_NBCB	0.59561	0.98944	0.54764	0.9322
chr1	36737472	36737489	genebody	chr1:36690016-36770958	THRAP3;ENSG00000054118.9;protein_coding	hypo	unmutCLL_NBCB	0.71246	0.97244	0.739091	0.968333
chr1	36760544	36760679	genebody	chr1:36690016-36770958	THRAP3;ENSG00000054118.9;protein_coding	hypo	unmutCLL_NBCB	0.67618	0.99422	0.744227	0.925
chr1	36771491	36771582	promoter	chr1:36771987-36790484	SH3D21;ENSG00000214193.5;protein_coding	hypo	unmutCLL_NBCB	0.69267	0.97267	0.896864	0.9885
chr1	36773845	36773973	promoter	chr1:36771987-36790484	SH3D21;ENSG00000214193.5;protein_coding	hypo	mutCLL_MBC,unmutCLL_NBCB	0.35232	0.99483	0.64718	0.98825
chr1	36774150	36774305	promoter	chr1:36771987-36790484	SH3D21;ENSG00000214193.5;protein_coding	hypo	unmutCLL_NBCB	0.5759	0.99807	0.927341	0.997
chr1	36817297	36817325	genebody	chr1:36805224-36851497	STK40;ENSG00000196182.6;protein_coding	hypo	unmutCLL_NBCB	0.63459	0.98942	0.906818	0.976222
chr1	3688149	3688193	genebody,promoter	chr1:3668961-3688209,chr1:3689351-3692546	CCDC27;ENSG00000162592.4;protein_coding,SMIM1;ENSG00000235169.3;protein_coding	hypo	mutCLL_MBC	0.6099	0.991	0.67025	0.95789
chr1	3705198	3705285	genebody	chr1:3696783-3713068	LRRC47;ENSG00000130764.5;protein_coding	hypo	unmutCLL_NBCB	0.71036	0.97393	0.76375	0.909083
chr1	3758921	3758934	genebody	chr1:3728644-3773778	CEP104;ENSG00000116198.8;protein_coding	hypo	mutCLL_MBC	0.856278	0.9915	0.73791	0.99678
chr1	38029182	38029251	genebody	chr1:38022519-38032458	DNALI1;ENSG00000163879.9;protein_coding	hypo	unmutCLL_NBCB	0.64219	0.99633	0.702545	0.9405
chr1	38262444	38262511	genebody	chr1:38259473-38266809	MANEAL;ENSG00000185090.10;protein_coding	hypo	mutCLL_MBC	0.55345	0.998667	0.58774	0.87978
chr1	40461081	40461172	intergenic	NA:NA-NA	NA	hypo	mutCLL_MBC,unmutCLL_NBCB	0.090789	0.98592	0.26878	0.89092
chr1	40805005	40805074	intergenic	NA:NA-NA	NA	hypo	unmutCLL_NBCB	0.70318	0.95387	0.778917	0.893
chr1	4136672	4136771	intergenic	NA:NA-NA	NA	hypo	unmutCLL_NBCB	0.64952	0.94189	0.592303	0.947833
chr1	41743507	41743532	genebody	chr1:41708044-41750533	RP11-399E6.1;ENSG00000235358.1;lincRNA	hypo	unmutCLL_NBCB	0.62836	0.99167	0.728818	0.853833
chr1	42927364	42927450	genebody,promoter	chr1:42921787-42939056,chr1:42929000-43120335	CCDC30;ENSG00000186409.10;protein_coding,PPCS;ENSG00000127125.7;protein_coding	hypo	unmutCLL_NBCB	0.71221	0.99011	0.788636	0.881167
chr1	43783616	43783760	genebody	chr1:43766663-43788779	TIE1;ENSG00000066056.9;protein_coding	hypo	unmutCLL_NBCB	0.48692	0.98905	0.788682	0.984722
chr1	43917081	43917164	genebody,promoter	chr1:43855552-43918321,chr1:43913446-43914315,chr1:43916823-43919660,chr1:43919597-43922666	HYI-AS1;ENSG00000229348.1;antisense,HYI;ENSG00000178922.12;protein_coding,SZT2-AS1;ENSG00000229372.1;antisense,SZT2;ENSG00000198198.9;protein_coding	hypo	mutCLL_MBC	0.68605	0.931333	0.62603	0.87733
chr1	43917103	43917184	genebody,promoter	chr1:43855552-43918321,chr1:43913446-43914315,chr1:43916823-43919660,chr1:43919597-43922666	HYI-AS1;ENSG00000229348.1;antisense,HYI;ENSG00000178922.12;protein_coding,SZT2-AS1;ENSG00000229372.1;antisense,SZT2;ENSG00000198198.9;protein_coding	hypo	unmutCLL_NBCB	0.7141	0.96956	0.711682	0.916833
chr1	44271593	44271699	genebody	chr1:44171494-44396831	ST3GAL3;ENSG00000126091.15;protein_coding	hypo	unmutCLL_NBCB	0.49179	0.97413	0.873782	0.949667
chr1	4520781	4520880	intergenic	NA:NA-NA	NA	hypo	unmutCLL_NBCB	0.68643	0.94333	0.804273	0.8975
chr1	4523653	4523668	intergenic	NA:NA-NA	NA	hypo	unmutCLL_NBCB	0.69669	0.99689	0.9147	0.916833
chr1	45269304	45269425	genebody,promoter	chr1:45265896-45271662,chr1:45274153-45281257	BTBD19;ENSG00000222009.4;protein_coding,PLK3;ENSG00000173846.8;protein_coding	hypo	unmutCLL_NBCB	0.42491	0.99217	0.605945	0.9886
chr1	45269316	45269425	genebody,promoter	chr1:45265896-45271662,chr1:45274153-45281257	BTBD19;ENSG00000222009.4;protein_coding,PLK3;ENSG00000173846.8;protein_coding	hypo	mutCLL_MBC	0.487875	0.999333	0.50793	0.95967
chr1	46640641	46640751	promoter	chr1:46505811-46642160,chr1:46640744-46651630,chr1:46641157-46642150	PIK3R3;ENSG00000117461.10;protein_coding,RP11-322N21.2;ENSG00000250719.1;antisense,TSPAN1;ENSG00000117472.5;protein_coding	hypo	unmutCLL_NBCB	0.61893	0.98144	0.866045	0.8935
chr1	4762651	4762679	genebody	chr1:4714791-4852594	AJAP1;ENSG00000196581.6;protein_coding	hypo	unmutCLL_NBCB	0.67163	0.96411	0.797818	0.890167
chr1	47900939	47900989	promoter	chr1:47897804-47900313,chr1:47901688-47906363	FOXD2-AS1;ENSG00000237424.1;antisense,FOXD2;ENSG00000186564.5;protein_coding	hypo	unmutCLL_NBCB	0.6267	0.95256	0.814303	0.989167
chr1	47910969	47910981	intergenic	NA:NA-NA	NA	hyper	unmutCLL_NBCB	0.39777	0.12844	0.245545	0.148
chr1	5019469	5019524	intergenic	NA:NA-NA	NA	hypo	unmutCLL_NBCB	0.51217	0.92122	0.637727	0.873833
chr1	5046273	5046319	intergenic	NA:NA-NA	NA	hypo	unmutCLL_NBCB	0.63096	0.97967	0.834889	0.9685
chr1	52986715	52986754	genebody	chr1:52873953-53019159	ZCCHC11;ENSG00000134744.9;protein_coding	hypo	mutCLL_MBC	0.91	0.999833	0.58336	0.98856
chr1	53026545	53026680	intergenic	NA:NA-NA	NA	hypo	unmutCLL_NBCB	0.71732	0.99789	0.674136	0.919667
chr1	53070436	53070584	promoter	chr1:53068043-53074723	GPX7;ENSG00000116157.5;protein_coding	hypo	unmutCLL_NBCB	0.57806	0.99839	0.719745	0.978722
chr1	54739152	54739197	genebody	chr1:54691104-54879152	SSBP3;ENSG00000157216.11;protein_coding	hypo	unmutCLL_NBCB	0.2365	0.99033	0.663091	0.952667
chr1	54739163	54739197	genebody	chr1:54691104-54879152	SSBP3;ENSG00000157216.11;protein_coding	hypo	mutCLL_MBC	0.215167	0.980667	0.63594	0.94011
chr1	54880499	54880534	promoter	chr1:54691104-54879152,chr1:54881928-54886533	RP4-705F19.1;ENSG00000232245.1;lincRNA,SSBP3;ENSG00000157216.11;protein_coding	hypo	unmutCLL_NBCB	0.45233	0.98544	0.645409	0.822833
chr1	55330732	55330918	genebody	chr1:55315305-55352891	DHCR24;ENSG00000116133.7;protein_coding	hypo	unmutCLL_NBCB	0.72584	0.986	0.763	0.929167
chr1	55802754	55802814	intergenic	NA:NA-NA	NA	hypo	unmutCLL_NBCB	0.72359	0.99278	0.65	0.9315
chr1	56788889	56788997	intergenic	NA:NA-NA	NA	hypo	unmutCLL_NBCB	0.69947	0.98992	0.819	0.936667
chr1	57285158	57285264	promoter	chr1:57184476-57285369	C1orf168;ENSG00000187889.8;protein_coding	hypo	unmutCLL_NBCB	0.6299	0.95011	0.708389	0.925
chr1	59280002	59280063	genebody,promoter	chr1:59250822-59365384,chr1:59278479-59279014	RP11-63G10.3;ENSG00000272226.1;lincRNA,RP4-794H19.2;ENSG00000234807.4;lincRNA	hypo	unmutCLL_NBCB	0.63219	0.90111	0.766889	0.882833
chr1	61251567	61251686	genebody	chr1:61125302-61291256	RP11-436K8.1;ENSG00000231252.1;lincRNA	hypo	unmutCLL_NBCB	0.71238	0.98111	0.870409	0.985
chr1	6140550	6140575	genebody	chr1:6051525-6161253	KCNAB2;ENSG00000069424.10;protein_coding	hypo	unmutCLL_NBCB	0.58163	0.89278	0.615591	0.8085
chr1	63703759	63703792	genebody	chr1:63655659-63782902	LINC00466;ENSG00000224209.2;lincRNA	hypo	unmutCLL_NBCB	0.73073	0.98922	0.739286	0.8835
chr1	63788260	63788272	promoter	chr1:63786554-63790112,chr1:63788729-63790797	FOXD3;ENSG00000187140.4;protein_coding,RP4-792G4.2;ENSG00000230798.1;antisense	hyper	mutCLL_MBC	0.34325	0.0563333	0.41836	0.13244
chr1	65192933	65192998	intergenic	NA:NA-NA	NA	hypo	unmutCLL_NBCB	0.63243	0.99922	0.813955	0.946333
chr1	65731504	65731516	genebody	chr1:65713901-65881552	DNAJC6;ENSG00000116675.11;protein_coding	hyper	unmutCLL_NBCB	0.3232	0.044667	0.325045	0.128
chr1	65778573	65778642	genebody	chr1:65713901-65881552	DNAJC6;ENSG00000116675.11;protein_coding	hypo	unmutCLL_NBCB	0.69643	0.99222	0.8635	0.928333
chr1	65857551	65857608	genebody	chr1:65713901-65881552	DNAJC6;ENSG00000116675.11;protein_coding	hypo	unmutCLL_NBCB	0.71216	1	0.7907	0.979167
chr1	6648367	6648462	genebody	chr1:6640060-6649340	ZBTB48;ENSG00000204859.7;protein_coding	hypo	unmutCLL_NBCB	0.37255	0.97317	0.748632	0.956
chr1	67028923	67029007	genebody	chr1:66999065-67213982	SGIP1;ENSG00000118473.17;protein_coding	hypo	unmutCLL_NBCB	0.74421	0.99733	0.720091	0.924167
chr1	6731714	6731747	genebody	chr1:6694227-6761984	DNAJC11;ENSG00000007923.11;protein_coding	hypo	mutCLL_MBC,unmutCLL_NBCB	0.6713	0.97478	0.64406	0.98678
chr1	68820732	68820901	intergenic	NA:NA-NA	NA	hypo	mutCLL_MBC,unmutCLL_NBCB	0.69449	0.99478	0.71317	0.98789
chr1	70452650	70452707	genebody	chr1:70034080-70617628	LRRC7;ENSG00000033122.14;protein_coding	hypo	unmutCLL_NBCB	0.63477	0.97156	0.8363	0.909667
chr1	74976046	74976115	genebody,promoter	chr1:74663918-75009666,chr1:74663946-75010112,chr1:74935561-74978298	FPGT-TNNI3K;ENSG00000259030.2;protein_coding,LRRC53;ENSG00000162621.5;protein_coding,TNNI3K;ENSG00000116783.10;protein_coding	hypo	unmutCLL_NBCB	0.73763	0.99922	0.790455	0.9645
chr1	7511031	7511049	genebody	chr1:6845383-7829766	CAMTA1;ENSG00000171735.14;protein_coding	hypo	unmutCLL_NBCB	0.59393	0.957	0.752286	0.91
chr1	7520391	7520452	genebody	chr1:6845383-7829766	CAMTA1;ENSG00000171735.14;protein_coding	hypo	unmutCLL_NBCB	0.7247	0.97967	0.690591	0.842833
chr1	76386678	76386753	genebody	chr1:76384557-76398116	ASB17;ENSG00000154007.6;protein_coding	hypo	unmutCLL_NBCB	0.72769	0.99276	0.730238	0.947944
chr1	76386692	76386704	genebody	chr1:76384557-76398116	ASB17;ENSG00000154007.6;protein_coding	hypo	mutCLL_MBC	0.39005	0.99	0.53097	0.938
chr1	78512062	78512075	genebody	chr1:78445225-78604133	GIPC2;ENSG00000137960.5;protein_coding	hyper	unmutCLL_NBCB	0.28645	0.0265	0.178037	0.135067
chr1	79347812	79347843	intergenic	NA:NA-NA	NA	hypo	unmutCLL_NBCB	0.70341	0.99522	0.771125	0.91
chr1	80168846	80168933	intergenic	NA:NA-NA	NA	hypo	unmutCLL_NBCB	0.743	0.99575	0.88303	0.990111
chr1	8060257	8060310	intergenic	NA:NA-NA	NA	hypo	unmutCLL_NBCB	0.67197	0.98756	0.737545	0.875667
chr1	8105394	8105451	genebody	chr1:8086797-8182762	RP11-431K24.1;ENSG00000238290.1;lincRNA	hypo	mutCLL_MBC,unmutCLL_NBCB	0.70867	0.97783	0.72668	0.98958
chr1	81068987	81069084	genebody	chr1:81001439-81112473	RP5-887A10.1;ENSG00000234184.1;lincRNA	hypo	unmutCLL_NBCB	0.71224	0.99744	0.758545	0.964667
chr1	8205038	8205057	intergenic	NA:NA-NA	NA	hypo	unmutCLL_NBCB	0.72306	0.98022	0.7129	0.892333
chr1	82068133	82068200	genebody	chr1:81771844-82458120,chr1:82051625-82091398	LPHN2;ENSG00000117114.15;protein_coding,RP5-837I24.4;ENSG00000236676.1;antisense	hypo	unmutCLL_NBCB	0.7231	0.99033	0.864182	0.966667
chr1	8433867	8433940	genebody	chr1:8412456-8877702	RERE;ENSG00000142599.13;protein_coding	hypo	unmutCLL_NBCB	0.70317	0.99933	0.931545	1
chr1	84919875	84919997	intergenic	NA:NA-NA	NA	hypo	unmutCLL_NBCB	0.74708	0.99822	0.981864	0.987333
chr1	86228955	86229024	genebody	chr1:86194915-86622626	COL24A1;ENSG00000171502.10;protein_coding	hypo	unmutCLL_NBCB	0.68884	0.98922	0.683455	0.874833
chr1	8740913	8741114	genebody	chr1:8412456-8877702	RERE;ENSG00000142599.13;protein_coding	hypo	mutCLL_MBC	0.166283	0.999	0.59625	0.9656
chr1	8754672	8754709	genebody	chr1:8412456-8877702	RERE;ENSG00000142599.13;protein_coding	hypo	unmutCLL_NBCB	0.27602	1	0.765167	0.982
chr1	8775055	8775176	genebody	chr1:8412456-8877702	RERE;ENSG00000142599.13;protein_coding	hypo	unmutCLL_NBCB	0.70653	0.99844	0.745167	0.9952
chr1	88208450	88208584	intergenic	NA:NA-NA	NA	hypo	unmutCLL_NBCB	0.74547	0.99589	0.765045	0.947667
chr1	8823719	8823853	genebody	chr1:8412456-8877702	RERE;ENSG00000142599.13;protein_coding	hypo	unmutCLL_NBCB	0.65787	0.99411	0.917318	0.987533
chr1	887535	887589	genebody	chr1:879583-894689	NOC2L;ENSG00000188976.6;protein_coding	hypo	unmutCLL_NBCB	0.69009	0.99878	0.696182	0.940833
chr1	887892	887965	genebody	chr1:879583-894689	NOC2L;ENSG00000188976.6;protein_coding	hypo	unmutCLL_NBCB	0.46303	0.97933	0.691773	0.875667
chr1	9005717	9005779	promoter	chr1:9005925-9035151	CA6;ENSG00000131686.10;protein_coding	hypo	unmutCLL_NBCB	0.46398	0.9975	0.834485	0.924778
chr1	90229455	90229569	genebody	chr1:90098630-90235462,chr1:90098698-90398809	LRRC8C;ENSG00000171488.10;protein_coding,RP11-302M6.4;ENSG00000271949.1;protein_coding	hypo	mutCLL_MBC,unmutCLL_NBCB	0.19165	0.97556	0.565	0.86144
chr1	90393789	90393908	genebody	chr1:90098698-90398809,chr1:90286572-90402170	LRRC8D;ENSG00000171492.10;protein_coding,RP11-302M6.4;ENSG00000271949.1;protein_coding	hypo	mutCLL_MBC,unmutCLL_NBCB	0.64349	0.99578	0.69278	0.99156
chr1	9071931	9072038	genebody	chr1:9063358-9086404	SLC2A7;ENSG00000197241.3;protein_coding	hypo	unmutCLL_NBCB	0.71661	0.9898	0.712659	0.908083
chr1	9072026	9072050	genebody	chr1:9063358-9086404	SLC2A7;ENSG00000197241.3;protein_coding	hypo	mutCLL_MBC	0.6678	0.987833	0.63734	0.91556
chr1	90960469	90960577	intergenic	NA:NA-NA	NA	hypo	unmutCLL_NBCB	0.69475	0.98856	0.754667	0.9065
chr1	90976816	90976951	genebody	chr1:90976466-90999029	RP5-827O9.1;ENSG00000229201.1;lincRNA	hypo	unmutCLL_NBCB	0.62679	0.99093	0.707786	0.934417
chr1	91031878	91031998	intergenic	NA:NA-NA	NA	hypo	unmutCLL_NBCB	0.6848	0.99733	0.768364	0.914833
chr1	91047998	91048029	intergenic	NA:NA-NA	NA	hypo	unmutCLL_NBCB	0.71488	0.99778	0.799556	0.896
chr1	91632504	91632535	intergenic	NA:NA-NA	NA	hypo	unmutCLL_NBCB	0.70295	0.97478	0.785667	0.9665
chr1	9362663	9362679	genebody	chr1:9352938-9429591	SPSB1;ENSG00000171621.9;protein_coding	hypo	mutCLL_MBC,unmutCLL_NBCB	0.667	0.986	0.64152	0.91922
chr1	9365488	9365563	genebody	chr1:9352938-9429591	SPSB1;ENSG00000171621.9;protein_coding	hypo	unmutCLL_NBCB	0.7246	0.99717	0.736273	0.865778
chr1	9373224	9373318	genebody	chr1:9352938-9429591	SPSB1;ENSG00000171621.9;protein_coding	hypo	mutCLL_MBC	0.81815	0.998333	0.66649	0.93422
chr1	9428087	9428137	genebody	chr1:9352938-9429591	SPSB1;ENSG00000171621.9;protein_coding	hypo	unmutCLL_NBCB	0.6555	0.95078	0.815455	0.921833
chr1	94703277	94703308	genebody	chr1:94614543-94740624	ARHGAP29;ENSG00000137962.8;protein_coding	hyper	unmutCLL_NBCB	0.42819	0.037481	0.311818	0.109875
chr1	94817027	94817105	intergenic	NA:NA-NA	NA	hypo	unmutCLL_NBCB	0.17556	0.58356	0.322909	0.6265
chr1	95149538	95149601	genebody	chr1:95104016-95285837	LINC01057;ENSG00000224081.3;lincRNA	hypo	unmutCLL_NBCB	0.70958	0.97756	0.815045	0.952667
chr1	9651855	9651878	genebody	chr1:9648931-9674935	TMEM201;ENSG00000188807.8;protein_coding	hypo	unmutCLL_NBCB	0.47999	0.95567	0.712556	0.981833
chr1	9741619	9741713	genebody	chr1:9711789-9789172,chr1:9732483-9747613	PIK3CD;ENSG00000171608.11;protein_coding,RP11-558F24.4;ENSG00000231789.2;antisense	hypo	mutCLL_MBC	0.4681	0.982167	0.53721	0.90444
chr1	9750710	9750812	genebody,promoter	chr1:9711789-9789172,chr1:9732483-9747613	PIK3CD;ENSG00000171608.11;protein_coding,RP11-558F24.4;ENSG00000231789.2;antisense	hypo	unmutCLL_NBCB	0.64393	0.98189	0.711727	0.9295
chr1	9784897	9784944	genebody	chr1:9711789-9789172	PIK3CD;ENSG00000171608.11;protein_coding	hypo	mutCLL_MBC,unmutCLL_NBCB	0.31986	0.9938	0.66215	0.93133
chr1	9816959	9816984	genebody	chr1:9789083-9884584	CLSTN1;ENSG00000171603.12;protein_coding	hypo	unmutCLL_NBCB	0.7001	0.99844	0.846773	0.977833
chr1	98436746	98436763	promoter	chr1:98432560-98434370	RP11-490G2.2;ENSG00000259946.1;lincRNA	hypo	mutCLL_MBC	0.82	0.991833	0.51576	0.79678
chr1	99006793	99006862	intergenic	NA:NA-NA	NA	hypo	unmutCLL_NBCB	0.71457	0.96878	0.886682	0.890833
chr10	100085815	100085884	intergenic	NA:NA-NA	NA	hypo	unmutCLL_NBCB	0.71413	0.97867	0.596636	0.8795
chr10	100587203	100587257	genebody	chr10:100218874-100995619	HPSE2;ENSG00000172987.8;protein_coding	hypo	unmutCLL_NBCB	0.72717	0.99767	0.653758	0.944167
chr10	102125572	102125644	intergenic	NA:NA-NA	NA	hypo	unmutCLL_NBCB	0.71379	0.99511	0.821091	0.910667
chr10	104078931	104078968	genebody	chr10:104005288-104142656	GBF1;ENSG00000107862.4;protein_coding	hypo	unmutCLL_NBCB	0.7115	0.96578	0.82475	0.969333
chr10	104433001	104433055	intergenic	NA:NA-NA	NA	hypo	unmutCLL_NBCB	0.54413	0.95967	0.881136	0.984167
chr10	104570908	104571070	genebody	chr10:104503726-104576021	WBP1L;ENSG00000166272.12;protein_coding	hypo	unmutCLL_NBCB	0.45612	0.99453	0.724417	0.971917
chr10	104656905	104656956	genebody	chr10:104614028-104661656,chr10:104629272-104661656	AS3MT;ENSG00000214435.3;protein_coding,C10orf32-ASMT;ENSG00000270316.1;protein_coding	hypo	mutCLL_MBC	0.7176	0.99725	0.67275	0.957
chr10	104656905	104656967	genebody	chr10:104614028-104661656,chr10:104629272-104661656	AS3MT;ENSG00000214435.3;protein_coding,C10orf32-ASMT;ENSG00000270316.1;protein_coding	hypo	unmutCLL_NBCB	0.73468	0.99772	0.672745	0.957
chr10	105258075	105258107	genebody	chr10:105239359-105277150,chr10:105253735-105352309	NEURL;ENSG00000107954.6;protein_coding,RP11-225H22.5;ENSG00000235470.1;antisense	hypo	unmutCLL_NBCB	0.67273	1	0.703424	0.941667
chr10	107407986	107408111	intergenic	NA:NA-NA	NA	hypo	unmutCLL_NBCB	0.65214	0.9555	0.623458	0.881222
chr10	112119698	112119834	intergenic	NA:NA-NA	NA	hypo	unmutCLL_NBCB	0.69715	0.99158	0.896808	0.982212
chr10	112123990	112124026	intergenic	NA:NA-NA	NA	hypo	unmutCLL_NBCB	0.596	0.99956	0.9331	0.9935
chr10	112589204	112589264	genebody	chr10:112404154-112599227	RBM20;ENSG00000203867.7;protein_coding	hypo	unmutCLL_NBCB	0.7307	0.99378	0.907318	0.991167
chr10	11298765	11298884	genebody	chr10:11047258-11378674	CELF2;ENSG00000048740.13;protein_coding	hypo	unmutCLL_NBCB	0.67196	0.997	0.849673	0.971267
chr10	11330512	11330622	genebody	chr10:11047258-11378674	CELF2;ENSG00000048740.13;protein_coding	hypo	unmutCLL_NBCB	0.51636	1	0.737409	0.945889
chr10	113445150	113445184	intergenic	NA:NA-NA	NA	hypo	mutCLL_MBC	0.541143	1	0.66267	0.98344
chr10	115019888	115019956	intergenic	NA:NA-NA	NA	hypo	unmutCLL_NBCB	0.73418	0.9925	0.8673	0.927111
chr10	115860246	115860309	intergenic	NA:NA-NA	NA	hypo	unmutCLL_NBCB	0.72487	0.97886	0.84735	0.968833
chr10	116904054	116904101	genebody	chr10:116853123-117708503	ATRNL1;ENSG00000107518.12;protein_coding	hypo	unmutCLL_NBCB	0.71997	0.99078	0.73405	0.957333
chr10	11712656	11712800	intergenic	NA:NA-NA	NA	hypo	unmutCLL_NBCB	0.71827	0.98206	0.787474	0.9736
chr10	118976221	118976255	intergenic	NA:NA-NA	NA	hyper	unmutCLL_NBCB	0.45675	0.039857	0.402717	0.0847778
chr10	118976225	118976255	intergenic	NA:NA-NA	NA	hyper	mutCLL_MBC	0.457975	0.0441333	0.44154	0.088167
chr10	120233353	120233367	intergenic	NA:NA-NA	NA	hypo	unmutCLL_NBCB	0.41247	0.76922	0.660909	0.755167
chr10	120726270	120726355	intergenic	NA:NA-NA	NA	hypo	unmutCLL_NBCB	0.71023	0.97422	0.779576	0.917167
chr10	121153000	121153076	genebody	chr10:120967100-121215131	GRK5;ENSG00000198873.10;protein_coding	hypo	unmutCLL_NBCB	0.61308	0.99956	0.7985	0.955
chr10	121201249	121201265	genebody	chr10:120967100-121215131	GRK5;ENSG00000198873.10;protein_coding	hypo	unmutCLL_NBCB	0.62887	0.99356	0.7591	0.982333
chr10	121216283	121216323	intergenic	NA:NA-NA	NA	hypo	unmutCLL_NBCB	0.74636	0.99867	0.823857	0.989667
chr10	121278363	121278436	genebody	chr10:121259339-121302220	RGS10;ENSG00000148908.10;protein_coding	hypo	unmutCLL_NBCB	0.60244	0.99875	0.792783	0.973778
chr10	121506401	121506456	genebody	chr10:121485608-121588652	INPP5F;ENSG00000198825.7;protein_coding	hypo	mutCLL_MBC	0.58555	1	0.6308	0.997
chr10	121506401	121506559	genebody	chr10:121485608-121588652	INPP5F;ENSG00000198825.7;protein_coding	hypo	unmutCLL_NBCB	0.71828	0.99728	0.7685	0.993467
chr10	121507577	121507798	genebody	chr10:121485608-121588652	INPP5F;ENSG00000198825.7;protein_coding	hypo	unmutCLL_NBCB	0.74433	0.9997	0.888192	0.99175
chr10	121508193	121508258	genebody	chr10:121485608-121588652	INPP5F;ENSG00000198825.7;protein_coding	hypo	mutCLL_MBC	0.4692	0.993	0.63396	0.96878
chr10	121508193	121508308	genebody	chr10:121485608-121588652	INPP5F;ENSG00000198825.7;protein_coding	hypo	unmutCLL_NBCB	0.56731	0.9928	0.723432	0.976583
chr10	121529050	121529114	genebody,promoter	chr10:121485608-121588652,chr10:121527758-121528052	INPP5F;ENSG00000198825.7;protein_coding,RN7SL846P;ENSG00000242818.2;misc_RNA	hypo	mutCLL_MBC,unmutCLL_NBCB	0.2841	0.98733	0.52542	0.97422
chr10	122271369	122271419	genebody	chr10:122216465-122349367	PPAPDC1A;ENSG00000203805.6;protein_coding	hypo	mutCLL_MBC	0.70675	0.994	0.66433	0.91822
chr10	122408049	122408126	intergenic	NA:NA-NA	NA	hypo	unmutCLL_NBCB	0.6762	0.97267	0.751773	0.906833
chr10	122815994	122816048	intergenic	NA:NA-NA	NA	hypo	unmutCLL_NBCB	0.70985	0.99842	0.730545	0.866
chr10	124865384	124865419	intergenic	NA:NA-NA	NA	hypo	unmutCLL_NBCB	0.72413	0.99244	0.7972	0.888833
chr10	125436577	125436631	genebody	chr10:125425870-125454123	GPR26;ENSG00000154478.3;protein_coding	hypo	unmutCLL_NBCB	0.66105	0.97656	0.804682	0.936167
chr10	126274540	126274649	genebody	chr10:126150402-126306457	LHPP;ENSG00000107902.9;protein_coding	hypo	mutCLL_MBC	0.628	1	0.65449	0.97689
chr10	126275759	126275894	genebody	chr10:126150402-126306457	LHPP;ENSG00000107902.9;protein_coding	hypo	unmutCLL_NBCB	0.60673	0.99892	0.678578	0.960889
chr10	126278117	126278192	genebody	chr10:126150402-126306457	LHPP;ENSG00000107902.9;protein_coding	hypo	mutCLL_MBC	0.6458	0.982667	0.62206	0.90989
chr10	126356141	126356210	genebody	chr10:126305648-126480296,chr10:126307860-126432838	FAM53B;ENSG00000189319.9;protein_coding,RP11-12J10.3;ENSG00000258539.1;protein_coding	hypo	unmutCLL_NBCB	0.7369	0.996	0.747955	0.973
chr10	126382878	126382964	genebody	chr10:126305648-126480296,chr10:126307860-126432838	FAM53B;ENSG00000189319.9;protein_coding,RP11-12J10.3;ENSG00000258539.1;protein_coding	hypo	mutCLL_MBC	0.3512	0.994167	0.68717	0.97956
chr10	126382878	126383013	genebody	chr10:126305648-126480296,chr10:126307860-126432838	FAM53B;ENSG00000189319.9;protein_coding,RP11-12J10.3;ENSG00000258539.1;protein_coding	hypo	unmutCLL_NBCB	0.2875	0.98908	0.708697	0.979556
chr10	126383134	126383249	genebody	chr10:126305648-126480296,chr10:126307860-126432838	FAM53B;ENSG00000189319.9;protein_coding,RP11-12J10.3;ENSG00000258539.1;protein_coding	hypo	mutCLL_MBC	0.527267	0.996417	0.69854	0.95273
chr10	126383134	126383314	genebody	chr10:126305648-126480296,chr10:126307860-126432838	FAM53B;ENSG00000189319.9;protein_coding,RP11-12J10.3;ENSG00000258539.1;protein_coding	hypo	unmutCLL_NBCB	0.42362	0.9935	0.699836	0.952733
chr10	126398484	126398535	genebody	chr10:126305648-126480296,chr10:126307860-126432838,chr10:126392193-126402786	FAM53B;ENSG00000189319.9;protein_coding,RP11-12J10.3;ENSG00000258539.1;protein_coding,RP11-464O2.2;ENSG00000233334.2;antisense	hypo	unmutCLL_NBCB	0.49643	0.99422	0.511409	0.993167
chr10	126695804	126695913	genebody	chr10:126676420-126849739	CTBP2;ENSG00000175029.12;protein_coding	hypo	unmutCLL_NBCB	0.73807	0.9906	0.770755	0.8795
chr10	127584449	127584467	promoter	chr10:127524905-127585005,chr10:127585107-127698161	DHX32;ENSG00000089876.7;protein_coding,FANK1;ENSG00000203780.6;protein_coding	hyper	unmutCLL_NBCB	0.43128	0.12193	0.429509	0.191833
chr10	127584991	127585029	promoter	chr10:127524905-127585005,chr10:127585107-127698161	DHX32;ENSG00000089876.7;protein_coding,FANK1;ENSG00000203780.6;protein_coding	hyper	mutCLL_MBC	0.418308	0.210333	0.49855	0.20878
chr10	128292759	128292798	genebody	chr10:128113565-128359079	C10orf90;ENSG00000154493.13;protein_coding	hypo	unmutCLL_NBCB	0.6586	0.97656	0.6245	0.917667
chr10	128538761	128538885	intergenic	NA:NA-NA	NA	hypo	unmutCLL_NBCB	0.67705	0.99933	0.64925	0.966333
chr10	128825646	128825773	genebody,promoter	chr10:128593977-129250781,chr10:128798540-128824771,chr10:128811764-128824739	DOCK1;ENSG00000150760.8;protein_coding,RP11-223P11.2;ENSG00000232935.2;antisense,RP11-223P11.3;ENSG00000223528.3;antisense	hypo	unmutCLL_NBCB	0.70233	0.98256	0.696864	0.8905
chr10	129845123	129845279	genebody	chr10:129705324-129884119	PTPRE;ENSG00000132334.12;protein_coding	hypo	unmutCLL_NBCB	0.71008	0.96867	0.798705	0.974
chr10	129864391	129864437	genebody	chr10:129705324-129884119	PTPRE;ENSG00000132334.12;protein_coding	hypo	mutCLL_MBC,unmutCLL_NBCB	0.040742	0.96307	0.062661	0.89693
chr10	129864560	129864645	genebody	chr10:129705324-129884119	PTPRE;ENSG00000132334.12;protein_coding	hypo	mutCLL_MBC,unmutCLL_NBCB	0.085613	0.99856	0.11303	0.97033
chr10	130109648	130109745	intergenic	NA:NA-NA	NA	hypo	unmutCLL_NBCB	0.59295	0.95078	0.763182	0.91
chr10	130380237	130380350	intergenic	NA:NA-NA	NA	hypo	unmutCLL_NBCB	0.71861	0.98444	0.72475	0.846833
chr10	130427656	130427672	intergenic	NA:NA-NA	NA	hypo	unmutCLL_NBCB	0.71914	0.98011	0.840286	0.891167
chr10	131167939	131167998	intergenic	NA:NA-NA	NA	hypo	unmutCLL_NBCB	0.64619	0.98778	0.8045	0.8715
chr10	131193174	131193240	intergenic	NA:NA-NA	NA	hypo	unmutCLL_NBCB	0.71488	0.9686	0.76325	0.8835
chr10	131329002	131329116	genebody	chr10:131265447-131566271	MGMT;ENSG00000170430.9;protein_coding	hypo	unmutCLL_NBCB	0.56656	0.99633	0.840325	0.966056
chr10	131329776	131329952	genebody	chr10:131265447-131566271	MGMT;ENSG00000170430.9;protein_coding	hypo	unmutCLL_NBCB	0.22539	0.99719	0.55947	0.988833
chr10	131329810	131329952	genebody	chr10:131265447-131566271	MGMT;ENSG00000170430.9;protein_coding	hypo	mutCLL_MBC	0.24926	1	0.48666	0.97444
chr10	131484914	131485081	genebody	chr10:131265447-131566271	MGMT;ENSG00000170430.9;protein_coding	hypo	unmutCLL_NBCB	0.58052	0.9924	0.870258	0.984
chr10	131762108	131762146	promoter	chr10:131633546-131762105	EBF3;ENSG00000108001.9;protein_coding	hyper	mutCLL_MBC	0.27046	0.0173333	0.47603	0.20111
chr10	131903398	131903486	genebody	chr10:131864637-131909081	LINC00959;ENSG00000237489.2;lincRNA	hypo	unmutCLL_NBCB	0.74788	1	0.883773	0.9915
chr10	132222669	132222789	intergenic	NA:NA-NA	NA	hypo	unmutCLL_NBCB	0.63171	0.94442	0.7449	0.905111
chr10	132876534	132876572	intergenic	NA:NA-NA	NA	hypo	unmutCLL_NBCB	0.66878	0.96725	0.777485	0.921
chr10	133155968	133156014	intergenic	NA:NA-NA	NA	hypo	unmutCLL_NBCB	0.51686	0.86367	0.617556	0.8825
chr10	134251405	134251434	genebody	chr10:134247236-134254988	RP11-432J24.3;ENSG00000234311.1;antisense	hypo	unmutCLL_NBCB	0.66685	0.96056	0.9473	1
chr10	134310782	134310797	intergenic	NA:NA-NA	NA	hypo	unmutCLL_NBCB	0.70261	0.99222	0.902667	0.9205
chr10	134322290	134322333	intergenic	NA:NA-NA	NA	hypo	mutCLL_MBC	0.07055	0.998167	0.30413	0.90422
chr10	134322290	134322469	intergenic	NA:NA-NA	NA	hypo	unmutCLL_NBCB	0.48773	0.99324	0.565182	0.906333
chr10	134405301	134405343	genebody	chr10:134351323-134596979	INPP5A;ENSG00000068383.14;protein_coding	hypo	unmutCLL_NBCB	0.56153	0.97978	0.706167	0.941333
chr10	134429570	134429603	genebody	chr10:134351323-134596979	INPP5A;ENSG00000068383.14;protein_coding	hypo	unmutCLL_NBCB	0.65343	0.96283	0.838636	0.963889
chr10	134500680	134500726	genebody	chr10:134351323-134596979	INPP5A;ENSG00000068383.14;protein_coding	hypo	mutCLL_MBC	0.731733	0.997778	0.71607	0.97058
chr10	134500680	134500793	genebody	chr10:134351323-134596979	INPP5A;ENSG00000068383.14;protein_coding	hypo	unmutCLL_NBCB	0.6453	0.99307	0.716068	0.970583
chr10	134549258	134549333	genebody	chr10:134351323-134596979	INPP5A;ENSG00000068383.14;protein_coding	hypo	unmutCLL_NBCB	0.72731	0.981	0.881591	0.9155
chr10	134801753	134801823	intergenic	NA:NA-NA	NA	hypo	unmutCLL_NBCB	0.62109	0.874	0.883045	0.8875
chr10	134844908	134844932	intergenic	NA:NA-NA	NA	hypo	unmutCLL_NBCB	0.66347	0.98633	0.802955	0.937167
chr10	134862822	134862860	intergenic	NA:NA-NA	NA	hypo	unmutCLL_NBCB	0.67796	0.98378	0.743773	0.925667
chr10	134865437	134865522	intergenic	NA:NA-NA	NA	hypo	unmutCLL_NBCB	0.70413	0.96556	0.821409	0.973833
chr10	135092822	135092837	promoter	chr10:135075906-135090372	ADAM8;ENSG00000151651.11;protein_coding	hypo	unmutCLL_NBCB	0.5914	0.93067	0.742571	0.955
chr10	135123335	135123391	promoter	chr10:135093134-135125841,chr10:135121978-135166033	TUBGCP2;ENSG00000130640.9;protein_coding,ZNF511;ENSG00000198546.10;protein_coding	hypo	mutCLL_MBC	0.477275	0.946167	0.56618	0.96007
chr10	135171842	135171859	promoter	chr10:135168657-135171529	FUOM;ENSG00000148803.7;protein_coding	hypo	unmutCLL_NBCB	0.6668	0.99822	0.866727	0.968167
chr10	135173884	135174061	promoter	chr10:135168657-135171529	FUOM;ENSG00000148803.7;protein_coding	hypo	unmutCLL_NBCB	0.66082	0.99242	0.788251	0.992303
chr10	13862941	13862990	genebody	chr10:13685705-14504141	FRMD4A;ENSG00000151474.15;protein_coding	hypo	unmutCLL_NBCB	0.54037	0.79456	0.640636	0.802
chr10	14131723	14131739	genebody	chr10:13685705-14504141	FRMD4A;ENSG00000151474.15;protein_coding	hypo	mutCLL_MBC	0.62065	0.993	0.61031	0.98078
chr10	14131723	14131794	genebody	chr10:13685705-14504141	FRMD4A;ENSG00000151474.15;protein_coding	hypo	unmutCLL_NBCB	0.63375	0.99367	0.615333	0.980778
chr10	1447080	1447182	genebody	chr10:1228072-1779670	ADARB2;ENSG00000185736.11;protein_coding	hypo	unmutCLL_NBCB	0.65017	0.93422	0.691182	0.902667
chr10	14984887	14984932	genebody	chr10:14939357-14996431	DCLRE1C;ENSG00000152457.13;protein_coding	hypo	mutCLL_MBC	0.68115	0.983167	0.69352	0.97489
chr10	14984887	14985023	genebody	chr10:14939357-14996431	DCLRE1C;ENSG00000152457.13;protein_coding	hypo	unmutCLL_NBCB	0.69852	0.98842	0.697185	0.974889
chr10	1692923	1693024	genebody	chr10:1228072-1779670	ADARB2;ENSG00000185736.11;protein_coding	hypo	mutCLL_MBC	0.72435	0.9415	0.5797	0.84044
chr10	1708341	1708379	genebody	chr10:1228072-1779670	ADARB2;ENSG00000185736.11;protein_coding	hypo	unmutCLL_NBCB	0.69138	0.97	0.884409	0.986
chr10	1729902	1730003	genebody	chr10:1228072-1779670	ADARB2;ENSG00000185736.11;protein_coding	hypo	unmutCLL_NBCB	0.67423	0.98617	0.769636	0.928
chr10	17329621	17329677	intergenic	NA:NA-NA	NA	hypo	unmutCLL_NBCB	0.73911	0.99778	0.835433	0.967
chr10	18629938	18629980	genebody	chr10:18429605-18830798	CACNB2;ENSG00000165995.14;protein_coding	hypo	mutCLL_MBC,unmutCLL_NBCB	0.2063	0.99467	0.54782	0.979
chr10	21362862	21362919	genebody	chr10:21068901-21463116	NEBL;ENSG00000078114.14;protein_coding	hypo	mutCLL_MBC	0.707167	0.998	0.63421	0.97456
chr10	21837448	21837507	genebody	chr10:21823093-22032559	MLLT10;ENSG00000078403.12;protein_coding	hypo	unmutCLL_NBCB	0.63173	0.99389	0.939295	0.952667
chr10	21857657	21857725	genebody,promoter	chr10:21823093-22032559,chr10:21853399-21853506	MLLT10;ENSG00000078403.12;protein_coding,RNU6-306P;ENSG00000207347.1;snRNA	hypo	unmutCLL_NBCB	0.65868	0.98556	0.938955	0.974667
chr10	23220002	23220090	genebody	chr10:23216952-23326518	ARMC3;ENSG00000165309.9;protein_coding	hypo	unmutCLL_NBCB	0.58883	0.99922	0.838045	0.9855
chr10	23734891	23735078	intergenic	NA:NA-NA	NA	hypo	unmutCLL_NBCB	0.74567	0.99921	0.811222	0.994143
chr10	24936926	24937018	genebody	chr10:24872537-25012597	ARHGAP21;ENSG00000107863.12;protein_coding	hypo	unmutCLL_NBCB	0.57104	1	0.734273	0.902667
chr10	27015710	27015862	genebody	chr10:26986587-27035727	PDSS1;ENSG00000148459.11;protein_coding	hypo	unmutCLL_NBCB	0.64125	0.9891	0.752695	0.946444
chr10	27082891	27082996	genebody,promoter	chr10:27035521-27150016,chr10:27079468-27079575	ABI1;ENSG00000136754.12;protein_coding,RNU6-946P;ENSG00000206605.1;snRNA	hypo	mutCLL_MBC,unmutCLL_NBCB	0.54243	0.98622	0.69516	0.97678
chr10	27096190	27096247	genebody	chr10:27035521-27150016	ABI1;ENSG00000136754.12;protein_coding	hypo	unmutCLL_NBCB	0.59588	0.99544	0.86645	0.9915
chr10	28789123	28789199	promoter	chr10:28721936-28784742	RP11-351M16.3;ENSG00000237128.1;lincRNA	hypo	unmutCLL_NBCB	0.63514	0.9975	0.629886	0.892556
chr10	29354272	29354342	intergenic	NA:NA-NA	NA	hypo	unmutCLL_NBCB	0.73223	0.99178	0.802687	0.907833
chr10	3085652	3085718	intergenic	NA:NA-NA	NA	hypo	unmutCLL_NBCB	0.60833	0.94978	0.8635	0.9735
chr10	31989568	31989581	genebody	chr10:31982011-31996316	RP11-472N13.3;ENSG00000237797.1;lincRNA	hypo	unmutCLL_NBCB	0.59595	0.989	0.853364	1
chr10	32171943	32172012	genebody	chr10:32094364-32217742	ARHGAP12;ENSG00000165322.13;protein_coding	hypo	unmutCLL_NBCB	0.6388	0.99767	0.855045	0.983
chr10	34368108	34368160	intergenic	NA:NA-NA	NA	hypo	unmutCLL_NBCB	0.7046	0.99356	0.818848	0.949667
chr10	34685047	34685092	genebody	chr10:34398487-35104253	PARD3;ENSG00000148498.11;protein_coding	hypo	unmutCLL_NBCB	0.72707	0.98367	0.925864	0.9895
chr10	34968164	34968247	genebody	chr10:34398487-35104253	PARD3;ENSG00000148498.11;protein_coding	hypo	unmutCLL_NBCB	0.7157	0.99567	0.816909	0.957667
chr10	353678	353701	genebody	chr10:320129-735683	DIP2C;ENSG00000151240.11;protein_coding	hypo	unmutCLL_NBCB	0.1531	0.99011	0.667273	0.920833
chr10	35472726	35472857	genebody	chr10:35415718-35501886	CREM;ENSG00000095794.15;protein_coding	hypo	unmutCLL_NBCB	0.67985	0.99353	0.80625	0.984583
chr10	3789978	3790045	promoter	chr10:3793258-3805418	RP11-184A2.3;ENSG00000229672.2;antisense	hypo	unmutCLL_NBCB	0.61181	0.99567	0.782803	0.989
chr10	43217314	43217466	intergenic	NA:NA-NA	NA	hypo	unmutCLL_NBCB	0.60678	0.98467	0.65335	0.877
chr10	43887473	43887547	genebody	chr10:43881064-43904614	HNRNPF;ENSG00000169813.12;protein_coding	hypo	unmutCLL_NBCB	0.70909	0.99456	0.841091	0.946667
chr10	44185630	44185641	intergenic	NA:NA-NA	NA	hyper	unmutCLL_NBCB	0.35185	0.036333	0.35385	0.152333
chr10	44185632	44185644	intergenic	NA:NA-NA	NA	hyper	mutCLL_MBC	0.355533	0.0363333	0.41085	0.14
chr10	44247360	44247506	intergenic	NA:NA-NA	NA	hypo	unmutCLL_NBCB	0.71052	0.98542	0.892727	0.963667
chr10	44965781	44965852	intergenic	NA:NA-NA	NA	hypo	unmutCLL_NBCB	0.71081	0.96275	0.803091	0.888583
chr10	47011075	47011117	intergenic	NA:NA-NA	NA	hypo	unmutCLL_NBCB	0.67318	0.99922	0.7485	0.941
chr10	5082385	5082487	genebody	chr10:5077545-5149878	AKR1C3;ENSG00000196139.7;protein_coding	hypo	unmutCLL_NBCB	0.71367	0.99833	0.856727	0.909167
chr10	52218238	52218275	genebody	chr10:52065359-52384923	SGMS1;ENSG00000198964.9;protein_coding	hypo	unmutCLL_NBCB	0.7294	0.99611	0.6394	0.988833
chr10	528317	528421	genebody	chr10:320129-735683	DIP2C;ENSG00000151240.11;protein_coding	hypo	unmutCLL_NBCB	0.71711	0.999	0.771818	0.923583
chr10	52979189	52979325	genebody	chr10:52750944-54058110	PRKG1;ENSG00000185532.10;protein_coding	hypo	unmutCLL_NBCB	0.71532	0.9956	0.789009	0.9055
chr10	54092353	54092471	intergenic	NA:NA-NA	NA	hypo	unmutCLL_NBCB	0.64853	0.99307	0.826739	0.97
chr10	54139828	54139918	intergenic	NA:NA-NA	NA	hypo	unmutCLL_NBCB	0.72485	0.9925	0.702436	0.9154
chr10	5548856	5548955	intergenic	NA:NA-NA	NA	hypo	unmutCLL_NBCB	0.62131	0.93	0.694222	0.805167
chr10	55636134	55636157	genebody	chr10:55562530-57387702	PCDH15;ENSG00000150275.13;protein_coding	hypo	mutCLL_MBC	0.76655	1	0.60703	0.87789
chr10	5674110	5674296	promoter	chr10:5673425-5673716	RN7SL445P;ENSG00000240577.2;misc_RNA	hypo	unmutCLL_NBCB	0.71753	0.99743	0.863303	0.971833
chr10	5952983	5953055	genebody	chr10:5931534-5979556	FBXO18;ENSG00000134452.15;protein_coding	hypo	mutCLL_MBC,unmutCLL_NBCB	0.31445	0.9992	0.51449	0.98687
chr10	61984150	61984217	genebody	chr10:61786055-62493248	ANK3;ENSG00000151150.16;protein_coding	hypo	unmutCLL_NBCB	0.32378	0.99278	0.563455	0.9815
chr10	62373567	62373628	genebody	chr10:61786055-62493248	ANK3;ENSG00000151150.16;protein_coding	hypo	unmutCLL_NBCB	0.70861	0.99656	0.785	0.910333
chr10	62840736	62840821	intergenic	NA:NA-NA	NA	hypo	unmutCLL_NBCB	0.72672	0.99447	0.781864	0.898
chr10	64536321	64536395	intergenic	NA:NA-NA	NA	hypo	mutCLL_MBC,unmutCLL_NBCB	0.40931	0.97911	0.54448	0.94633
chr10	64976206	64976265	genebody	chr10:64926980-65225722	JMJD1C;ENSG00000171988.13;protein_coding	hypo	unmutCLL_NBCB	0.73271	0.99367	0.797	0.909667
chr10	66170169	66170203	intergenic	NA:NA-NA	NA	hypo	unmutCLL_NBCB	0.7121	0.97589	0.805091	0.943
chr10	68649649	68649837	genebody	chr10:67672275-69455927	CTNNA3;ENSG00000183230.12;protein_coding	hypo	unmutCLL_NBCB	0.64391	0.99773	0.66555	0.919167
chr10	68649695	68649794	genebody	chr10:67672275-69455927	CTNNA3;ENSG00000183230.12;protein_coding	hypo	mutCLL_MBC	0.623	0.9955	0.60857	0.90844
chr10	68678747	68678816	genebody	chr10:67672275-69455927	CTNNA3;ENSG00000183230.12;protein_coding	hypo	unmutCLL_NBCB	0.66996	0.99478	0.749545	0.934833
chr10	70558463	70558524	intergenic	NA:NA-NA	NA	hypo	unmutCLL_NBCB	0.098897	0.95873	0.295848	0.927667
chr10	70558467	70558508	intergenic	NA:NA-NA	NA	hypo	mutCLL_MBC	0.102	0.9945	0.2923	0.94644
chr10	70807662	70807737	intergenic	NA:NA-NA	NA	hypo	mutCLL_MBC,unmutCLL_NBCB	0.10876	0.99333	0.26311	0.91367
chr10	70809426	70809492	intergenic	NA:NA-NA	NA	hypo	mutCLL_MBC,unmutCLL_NBCB	0.16323	0.901	0.34167	0.75856
chr10	70809798	70809835	intergenic	NA:NA-NA	NA	hypo	mutCLL_MBC,unmutCLL_NBCB	0.30337	0.99178	0.55552	0.98189
chr10	70882736	70882811	promoter	chr10:70883267-70932617	VPS26A;ENSG00000122958.10;protein_coding	hypo	unmutCLL_NBCB	0.64617	0.98089	0.7205	0.925667
chr10	70999163	70999244	genebody	chr10:70980058-71027315	HKDC1;ENSG00000156510.11;protein_coding	hypo	unmutCLL_NBCB	0.69389	0.97578	0.684636	0.9105
chr10	71412553	71412604	intergenic	NA:NA-NA	NA	hypo	unmutCLL_NBCB	0.70588	0.99044	0.946667	0.978167
chr10	72344251	72344378	intergenic	NA:NA-NA	NA	hypo	mutCLL_MBC,unmutCLL_NBCB	0.17854	0.83122	0.36681	0.74878
chr10	72362807	72362873	promoter	chr10:72357103-72362531	PRF1;ENSG00000180644.6;protein_coding	hypo	unmutCLL_NBCB	0.286	0.99267	0.8225	0.960083
chr10	72489632	72489666	genebody	chr10:72432558-72522197	ADAMTS14;ENSG00000138316.6;protein_coding	hypo	unmutCLL_NBCB	0.70801	0.99856	0.7414	0.894
chr10	73155915	73155939	promoter	chr10:73156690-73575702	CDH23;ENSG00000107736.15;protein_coding	hypo	unmutCLL_NBCB	0.65043	0.95311	0.814727	0.944
chr10	73169168	73169244	genebody	chr10:73156690-73575702	CDH23;ENSG00000107736.15;protein_coding	hypo	unmutCLL_NBCB	0.56293	0.99567	0.809111	0.939667
chr10	73254396	73254557	genebody	chr10:73156690-73575702	CDH23;ENSG00000107736.15;protein_coding	hypo	unmutCLL_NBCB	0.45643	0.996	0.812424	0.962333
chr10	73331358	73331399	genebody	chr10:73156690-73575702	CDH23;ENSG00000107736.15;protein_coding	hypo	unmutCLL_NBCB	0.66535	0.99317	0.692333	0.830222
chr10	73544115	73544150	genebody	chr10:73156690-73575702	CDH23;ENSG00000107736.15;protein_coding	hypo	unmutCLL_NBCB	0.5817	0.95678	0.724182	0.920667
chr10	73579666	73579762	genebody	chr10:73576054-73611126	PSAP;ENSG00000197746.9;protein_coding	hypo	unmutCLL_NBCB	0.70241	0.99647	0.916682	0.987333
chr10	73664608	73664700	intergenic	NA:NA-NA	NA	hypo	unmutCLL_NBCB	0.61835	0.97944	0.7955	0.961167
chr10	73837528	73837719	genebody	chr10:73818792-73848790	SPOCK2;ENSG00000107742.8;protein_coding	hypo	unmutCLL_NBCB	0.52785	0.99715	0.848377	0.987333
chr10	73844107	73844182	genebody	chr10:73818792-73848790	SPOCK2;ENSG00000107742.8;protein_coding	hypo	mutCLL_MBC,unmutCLL_NBCB	0.30749	0.99825	0.53842	0.97142
chr10	73846302	73846467	promoter	chr10:73818792-73848790	SPOCK2;ENSG00000107742.8;protein_coding	hypo	mutCLL_MBC	0.442976	0.987881	0.70735	0.99676
chr10	73846302	73846474	promoter	chr10:73818792-73848790	SPOCK2;ENSG00000107742.8;protein_coding	hypo	unmutCLL_NBCB	0.43609	0.98852	0.702516	0.996756
chr10	73970549	73970710	genebody	chr10:73856277-73976892	ASCC1;ENSG00000138303.13;protein_coding	hypo	mutCLL_MBC,unmutCLL_NBCB	0.46291	1	0.69212	0.97025
chr10	74002987	74003130	intergenic	NA:NA-NA	NA	hypo	mutCLL_MBC	0.289929	0.983222	0.56262	0.96471
chr10	74007502	74007645	intergenic	NA:NA-NA	NA	hypo	unmutCLL_NBCB	0.49596	0.99013	0.5438	0.946667
chr10	74007524	74007630	intergenic	NA:NA-NA	NA	hypo	mutCLL_MBC	0.4823	0.997167	0.42513	0.92889
chr10	74084844	74084905	intergenic	NA:NA-NA	NA	hypo	unmutCLL_NBCB	0.72372	0.98978	0.768773	0.991167
chr10	74388880	74388961	promoter	chr10:74127097-74385899	MICU1;ENSG00000107745.12;protein_coding	hypo	unmutCLL_NBCB	0.7325	0.99287	0.849477	0.969583
chr10	7448787	7448865	genebody	chr10:7200585-7453450	SFMBT2;ENSG00000198879.7;protein_coding	hypo	unmutCLL_NBCB	0.66155	0.996	0.815	0.987667
chr10	75946104	75946230	genebody	chr10:75910959-76469061	ADK;ENSG00000156110.9;protein_coding	hypo	unmutCLL_NBCB	0.6698	0.99956	0.763818	0.954167
chr10	76511488	76511605	intergenic	NA:NA-NA	NA	hypo	unmutCLL_NBCB	0.72458	0.99283	0.920333	0.960444
chr10	76656179	76656203	genebody	chr10:76585339-76792380	KAT6B;ENSG00000156650.8;protein_coding	hypo	mutCLL_MBC	0.7763	0.988667	0.66482	0.96944
chr10	76797132	76797166	intergenic	NA:NA-NA	NA	hypo	mutCLL_MBC	0.0862857	0.9965	0.12842	0.91222
chr10	76797339	76797497	intergenic	NA:NA-NA	NA	hypo	mutCLL_MBC	0.07633	0.986889	0.21016	0.9819
chr10	76797367	76797420	intergenic	NA:NA-NA	NA	hypo	unmutCLL_NBCB	0.082696	0.98942	0.207152	0.985889
chr10	78477620	78477637	intergenic	NA:NA-NA	NA	hypo	unmutCLL_NBCB	0.63387	0.99367	0.732955	0.8945
chr10	79337050	79337100	genebody	chr10:78629358-79398353	KCNMA1;ENSG00000156113.16;protein_coding	hypo	unmutCLL_NBCB	0.64822	0.99533	0.690295	0.93175
chr10	81948797	81948862	genebody	chr10:81910644-81965328	ANXA11;ENSG00000122359.13;protein_coding	hypo	mutCLL_MBC,unmutCLL_NBCB	0.34543	1	0.47106	0.98656
chr10	862963	863078	genebody	chr10:855483-977564	LARP4B;ENSG00000107929.10;protein_coding	hypo	unmutCLL_NBCB	0.52901	0.98911	0.29645	0.987667
chr10	86604858	86604899	intergenic	NA:NA-NA	NA	hypo	unmutCLL_NBCB	0.68908	0.99444	0.643938	0.882
chr10	87928782	87928876	genebody	chr10:87359311-88126250	GRID1;ENSG00000182771.13;protein_coding	hypo	unmutCLL_NBCB	0.58103	0.99244	0.714545	0.876
chr10	88288924	88288964	intergenic	NA:NA-NA	NA	hypo	unmutCLL_NBCB	0.5869	0.98133	0.8139	0.8745
chr10	89994738	89994874	intergenic	NA:NA-NA	NA	hypo	mutCLL_MBC	0.790002	0.995333	0.73927	0.99446
chr10	89994744	89994844	intergenic	NA:NA-NA	NA	hypo	unmutCLL_NBCB	0.71768	0.99693	0.708788	0.994467
chr10	92566128	92566156	genebody	chr10:92500577-92617671	HTR7;ENSG00000148680.11;protein_coding	hypo	unmutCLL_NBCB	0.59283	0.98622	0.79837	0.928833
chr10	92566128	92566211	genebody	chr10:92500577-92617671	HTR7;ENSG00000148680.11;protein_coding	hypo	mutCLL_MBC	0.645122	0.986222	0.58451	0.96756
chr10	94400420	94400481	genebody	chr10:94353042-94415150	KIF11;ENSG00000138160.4;protein_coding	hypo	unmutCLL_NBCB	0.73475	0.99781	0.787574	0.9995
chr10	98823545	98823601	genebody	chr10:98757794-98945677,chr10:98757794-99052413	ARHGAP19-SLIT1;ENSG00000269891.1;protein_coding,SLIT1;ENSG00000187122.12;protein_coding	hypo	unmutCLL_NBCB	0.54442	0.81533	0.698136	0.829167
chr10	99619237	99619337	genebody	chr10:99609995-99631337	GOLGA7B;ENSG00000155265.6;protein_coding	hypo	unmutCLL_NBCB	0.71473	0.97789	0.814227	0.941
chr11	100090863	100090900	genebody	chr11:98891682-100229616	CNTN5;ENSG00000149972.6;protein_coding	hypo	unmutCLL_NBCB	0.67251	0.97978	0.703333	0.853167
chr11	10590157	10590224	genebody	chr11:10562818-10621479,chr11:10578512-10633236	LYVE1;ENSG00000133800.4;protein_coding,MRVI1-AS1;ENSG00000177112.3;antisense	hypo	unmutCLL_NBCB	0.71125	1	0.855773	0.994833
chr11	106610883	106610969	genebody	chr11:106544737-106889250	GUCY1A2;ENSG00000152402.6;protein_coding	hypo	unmutCLL_NBCB	0.64787	0.923	0.884182	0.969333
chr11	107481185	107481281	genebody	chr11:107461816-107537505	ELMOD1;ENSG00000110675.8;protein_coding	hypo	unmutCLL_NBCB	0.7429	0.99822	0.757864	0.917667
chr11	113756264	113756325	intergenic	NA:NA-NA	NA	hypo	mutCLL_MBC	0.50015	1	0.46116	0.73133
chr11	113800653	113800701	genebody	chr11:113775398-113817287	HTR3B;ENSG00000149305.2;protein_coding	hypo	unmutCLL_NBCB	0.65203	0.97922	0.753	0.959333
chr11	11426337	11426492	genebody	chr11:11292422-11643552	GALNT18;ENSG00000110328.5;protein_coding	hypo	unmutCLL_NBCB	0.67197	0.99867	0.6925	0.881333
chr11	116147702	116147765	intergenic	NA:NA-NA	NA	hypo	unmutCLL_NBCB	0.4629	0.76856	0.700273	0.715833
chr11	116225482	116225569	intergenic	NA:NA-NA	NA	hypo	unmutCLL_NBCB	0.6736	0.97711	0.705227	0.892667
chr11	116661245	116661391	promoter	chr11:116648435-116658766,chr11:116660082-116663136	APOA5;ENSG00000110243.7;protein_coding,ZNF259;ENSG00000109917.6;protein_coding	hypo	unmutCLL_NBCB	0.71677	0.97793	0.851698	0.949255
chr11	117025827	117025869	genebody	chr11:117014982-117047610	PAFAH1B2;ENSG00000168092.9;protein_coding	hypo	unmutCLL_NBCB	0.69341	0.99567	0.7919	0.929667
chr11	117054794	117054852	genebody	chr11:117049448-117068160	SIDT2;ENSG00000149577.11;protein_coding	hypo	unmutCLL_NBCB	0.71466	0.99733	0.947533	0.997556
chr11	117546381	117546476	genebody	chr11:117298488-117688240	DSCAML1;ENSG00000177103.9;protein_coding	hypo	unmutCLL_NBCB	0.70558	0.98622	0.620523	0.967667
chr11	117693158	117693183	genebody,promoter	chr11:117298488-117688240,chr11:117671558-117699413,chr11:117689157-117693172,chr11:117690877-117747382	DSCAML1;ENSG00000177103.9;protein_coding,FXYD2;ENSG00000137731.9;protein_coding,FXYD6-FXYD2;ENSG00000255245.3;protein_coding,RP11-728F11.3;ENSG00000254844.3;antisense	hypo	unmutCLL_NBCB	0.53017	0.83856	0.761944	0.845
chr11	118043691	118043756	genebody	chr11:118032665-118047388	SCN2B;ENSG00000149575.5;protein_coding	hypo	unmutCLL_NBCB	0.72503	0.99411	0.689227	0.898833
chr11	118159167	118159291	intergenic	NA:NA-NA	NA	hypo	unmutCLL_NBCB	0.64424	0.97778	0.895818	0.9895
chr11	118895502	118895587	genebody	chr11:118889141-118896164,chr11:118894823-118901616	SLC37A4;ENSG00000137700.12;protein_coding,TRAPPC4;ENSG00000196655.5;protein_coding	hypo	unmutCLL_NBCB	0.68293	0.96658	0.941926	0.958111
chr11	119026276	119026320	genebody,promoter	chr11:119019721-119033360,chr11:119027589-119027930	ABCG4;ENSG00000172350.5;protein_coding,AP002956.1;ENSG00000268192.1;protein_coding	hypo	unmutCLL_NBCB	0.55427	0.964	0.566	0.908333
chr11	119406044	119406126	intergenic	NA:NA-NA	NA	hypo	unmutCLL_NBCB	0.69134	0.971	0.694879	0.926667
chr11	12000963	12001014	genebody	chr11:11984652-12031316	DKK3;ENSG00000050165.13;protein_coding	hypo	unmutCLL_NBCB	0.60102	0.961	0.702591	0.882833
chr11	121435499	121435532	genebody	chr11:121322911-121504402	SORL1;ENSG00000137642.8;protein_coding	hypo	unmutCLL_NBCB	0.67818	0.98989	0.9101	0.978
chr11	121448061	121448107	genebody	chr11:121322911-121504402	SORL1;ENSG00000137642.8;protein_coding	hypo	unmutCLL_NBCB	0.51709	0.84011	0.8005	0.9985
chr11	122582265	122582307	genebody	chr11:122526382-122685181	UBASH3B;ENSG00000154127.5;protein_coding	hypo	mutCLL_MBC	0.2986	1	0.31895	0.97511
chr11	122626033	122626157	genebody	chr11:122526382-122685181	UBASH3B;ENSG00000154127.5;protein_coding	hypo	mutCLL_MBC,unmutCLL_NBCB	0.30634	0.99842	0.61525	0.97325
chr11	122637707	122637724	genebody	chr11:122526382-122685181	UBASH3B;ENSG00000154127.5;protein_coding	hypo	unmutCLL_NBCB	0.66232	0.98789	0.87225	0.94
chr11	124526770	124526930	genebody	chr11:124503008-124565603	SIAE;ENSG00000110013.8;protein_coding	hypo	unmutCLL_NBCB	0.36905	0.98928	0.61329	0.918667
chr11	124526776	124526872	genebody	chr11:124503008-124565603	SIAE;ENSG00000110013.8;protein_coding	hypo	mutCLL_MBC	0.274167	0.990556	0.60448	0.91708
chr11	124736279	124736298	promoter	chr11:124735281-124751366	ROBO3;ENSG00000154134.10;protein_coding	hyper	unmutCLL_NBCB	0.29743	0.043444	0.297455	0.153667
chr11	124945937	124945991	genebody	chr11:124932962-124959131	SLC37A2;ENSG00000134955.7;protein_coding	hypo	mutCLL_MBC,unmutCLL_NBCB	0.18671	0.996	0.36969	0.95589
chr11	125082441	125082491	genebody	chr11:125034582-125303285	PKNOX2;ENSG00000165495.11;protein_coding	hypo	unmutCLL_NBCB	0.61651	0.99033	0.79065	0.949
chr11	125115325	125115473	genebody	chr11:125034582-125303285	PKNOX2;ENSG00000165495.11;protein_coding	hypo	unmutCLL_NBCB	0.65995	0.96908	0.831364	0.925889
chr11	125122604	125122685	genebody	chr11:125034582-125303285	PKNOX2;ENSG00000165495.11;protein_coding	hypo	unmutCLL_NBCB	0.62667	0.98467	0.724409	0.843
chr11	12695801	12695856	promoter	chr11:12695968-12966298	TEAD1;ENSG00000187079.10;protein_coding	hyper	mutCLL_MBC	0.264484	0.0170667	0.34734	0.066571
chr11	127552150	127552219	intergenic	NA:NA-NA	NA	hypo	unmutCLL_NBCB	0.69712	0.98442	0.857019	0.890667
chr11	128489320	128489404	promoter	chr11:128484234-128485131,chr11:128485761-128491701	RP11-264E20.1;ENSG00000255465.3;lincRNA,RP11-264E20.2;ENSG00000270160.1;lincRNA	hypo	unmutCLL_NBCB	0.68133	0.99667	0.77235	0.9875
chr11	128635358	128635380	genebody	chr11:128556429-128683162	FLI1;ENSG00000151702.12;protein_coding	hypo	unmutCLL_NBCB	0.69737	0.98744	0.976	0.994333
chr11	129971768	129971844	genebody	chr11:129939731-130014699	APLP2;ENSG00000084234.12;protein_coding	hypo	unmutCLL_NBCB	0.71695	1	0.7687	0.954333
chr11	130057181	130057263	genebody	chr11:130029456-130080271	ST14;ENSG00000149418.6;protein_coding	hypo	unmutCLL_NBCB	0.63615	0.99378	0.793682	0.971
chr11	1328214	1328285	genebody,promoter	chr11:1295600-1330884,chr11:1330998-1331937	TOLLIP-AS1;ENSG00000255153.1;antisense,TOLLIP;ENSG00000078902.11;protein_coding	hypo	unmutCLL_NBCB	0.57258	0.96	0.669409	0.935111
chr11	132952660	132952759	genebody	chr11:132284870-133402414	OPCML;ENSG00000183715.9;protein_coding	hyper	unmutCLL_NBCB	0.277	0.014467	0.187891	0.0658667
chr11	13347620	13347673	genebody	chr11:13298198-13408813	ARNTL;ENSG00000133794.13;protein_coding	hypo	unmutCLL_NBCB	0.48053	0.99422	0.8143	0.994667
chr11	133820461	133820616	genebody	chr11:133778458-133826880	IGSF9B;ENSG00000080854.10;protein_coding	hypo	unmutCLL_NBCB	0.73391	0.994	0.734394	0.893111
chr11	133912503	133912621	genebody	chr11:133902166-133916744	RP11-713P17.3;ENSG00000204241.3;lincRNA	hypo	unmutCLL_NBCB	0.70795	0.986	0.743515	0.910333
chr11	134268821	134268949	genebody	chr11:134248397-134281812	B3GAT1;ENSG00000109956.8;protein_coding	hypo	unmutCLL_NBCB	0.59853	0.96611	0.8283	0.930667
chr11	1471008	1471063	genebody	chr11:1411128-1483919	BRSK2;ENSG00000174672.11;protein_coding	hypo	unmutCLL_NBCB	0.65497	0.95789	0.655818	0.906167
chr11	1507739	1507861	genebody	chr11:1490686-1522477	MOB2;ENSG00000182208.8;protein_coding	hypo	unmutCLL_NBCB	0.52152	0.9932	0.70974	0.976333
chr11	1533107	1533153	intergenic	NA:NA-NA	NA	hypo	unmutCLL_NBCB	0.6852	0.99533	0.6813	0.874167
chr11	16616384	16616488	genebody	chr11:15987994-16761138	SOX6;ENSG00000110693.11;protein_coding	hypo	unmutCLL_NBCB	0.73673	0.99044	0.82175	0.977333
chr11	17409864	17409982	promoter	chr11:17407405-17410878	KCNJ11;ENSG00000187486.5;protein_coding	hypo	unmutCLL_NBCB	0.69557	0.97489	0.622758	0.914
chr11	1864990	1865006	intergenic	NA:NA-NA	NA	hypo	mutCLL_MBC	0.500833	0.9985	0.73599	0.992
chr11	1865111	1865162	intergenic	NA:NA-NA	NA	hypo	mutCLL_MBC,unmutCLL_NBCB	0.30691	0.94	0.6109	0.98125
chr11	1884382	1884516	genebody,promoter	chr11:1874199-1913497,chr11:1880693-1880766,chr11:1885406-1887897	AC051649.12;ENSG00000249086.1;sense_overlapping,LSP1;ENSG00000130592.9;protein_coding,MIR4298;ENSG00000264493.1;miRNA	hypo	unmutCLL_NBCB	0.6891	0.98937	0.840051	0.962444
chr11	19310757	19310812	intergenic	NA:NA-NA	NA	hypo	unmutCLL_NBCB	0.63741	0.98856	0.767273	0.974
chr11	19735064	19735084	genebody,promoter	chr11:19372270-20143144,chr11:19732479-19734165	NAV2;ENSG00000166833.15;protein_coding,RP11-359E10.1;ENSG00000270607.1;lincRNA	hyper	unmutCLL_NBCB	0.34152	0.048467	0.328864	0.1625
chr11	19735185	19735195	genebody,promoter	chr11:19372270-20143144,chr11:19732479-19734165	NAV2;ENSG00000166833.15;protein_coding,RP11-359E10.1;ENSG00000270607.1;lincRNA	hyper	unmutCLL_NBCB	0.30563	0.045778	0.236182	0.157833
chr11	20003904	20003975	genebody,promoter	chr11:19372270-20143144,chr11:20000244-20002883	NAV2-AS3;ENSG00000254542.1;antisense,NAV2;ENSG00000166833.15;protein_coding	hypo	unmutCLL_NBCB	0.6528	0.99989	0.769727	0.958833
chr11	2141596	2141657	intergenic	NA:NA-NA	NA	hypo	mutCLL_MBC,unmutCLL_NBCB	0.48597	0.98289	0.61652	0.94017
chr11	21832560	21832656	intergenic	NA:NA-NA	NA	hypo	mutCLL_MBC,unmutCLL_NBCB	0.65367	0.93744	0.55812	0.82244
chr11	24222670	24222833	intergenic	NA:NA-NA	NA	hypo	unmutCLL_NBCB	0.72192	0.9982	0.808	0.96025
chr11	2481368	2481474	genebody	chr11:2465913-2870339	KCNQ1;ENSG00000053918.11;protein_coding	hypo	unmutCLL_NBCB	0.69936	0.97358	0.588303	0.850556
chr11	25078370	25078395	genebody	chr11:24518515-25104150	LUZP2;ENSG00000187398.7;protein_coding	hypo	mutCLL_MBC	0.723714	0.997333	0.51748	0.97511
chr11	2520124	2520192	genebody	chr11:2465913-2870339	KCNQ1;ENSG00000053918.11;protein_coding	hypo	unmutCLL_NBCB	0.72545	0.99733	0.777409	0.952333
chr11	258636	258643	intergenic	NA:NA-NA	NA	hypo	unmutCLL_NBCB	0.70756	0.99956	0.84845	0.9935
chr11	26618406	26618435	genebody	chr11:26210828-26684835	ANO3;ENSG00000134343.8;protein_coding	hypo	unmutCLL_NBCB	0.6497	0.98378	0.579625	0.9055
chr11	26665022	26665099	genebody	chr11:26210828-26684835	ANO3;ENSG00000134343.8;protein_coding	hypo	unmutCLL_NBCB	0.61687	0.92133	0.752409	0.881667
chr11	304078	304108	promoter	chr11:298199-299526,chr11:307630-315272	IFITM2;ENSG00000185201.12;protein_coding,IFITM5;ENSG00000206013.2;protein_coding	hypo	unmutCLL_NBCB	0.72244	0.9806	0.93595	0.945083
chr11	3225765	3225852	intergenic	NA:NA-NA	NA	hypo	mutCLL_MBC	0.74685	1	0.57277	0.82556
chr11	32425599	32425685	genebody	chr11:32409320-32457176	WT1;ENSG00000184937.8;protein_coding	hypo	unmutCLL_NBCB	0.63859	0.97889	0.824667	0.894667
chr11	34545453	34545512	intergenic	NA:NA-NA	NA	hypo	unmutCLL_NBCB	0.68113	0.96233	0.795364	0.959333
chr11	36047037	36047086	genebody	chr11:35965530-36253686	LDLRAD3;ENSG00000179241.8;protein_coding	hypo	mutCLL_MBC	0.66037	0.985667	0.34806	0.98233
chr11	3909052	3909111	genebody	chr11:3875756-4114439	STIM1;ENSG00000167323.5;protein_coding	hypo	unmutCLL_NBCB	0.7284	0.98389	0.7356	0.949
chr11	39588610	39588682	intergenic	NA:NA-NA	NA	hypo	unmutCLL_NBCB	0.6805	0.97778	0.761636	0.886333
chr11	40445171	40445188	genebody	chr11:40135752-41481323	LRRC4C;ENSG00000148948.3;protein_coding	hypo	mutCLL_MBC,unmutCLL_NBCB	0.68575	0.999	0.67045	0.9795
chr11	41682098	41682113	genebody	chr11:41540444-41735998	RP11-124G5.3;ENSG00000255388.1;lincRNA	hypo	unmutCLL_NBCB	0.713	0.98789	0.782864	0.913333
chr11	41737913	41738048	promoter	chr11:41540444-41735998,chr11:41736117-41857992	RP11-124G5.3;ENSG00000255388.1;lincRNA,RP11-375D13.2;ENSG00000255171.1;lincRNA	hypo	unmutCLL_NBCB	0.71982	0.9836	0.808508	0.958583
chr11	44638872	44638964	genebody	chr11:44585976-44641913	CD82;ENSG00000085117.7;protein_coding	hypo	unmutCLL_NBCB	0.65757	0.99513	0.772925	0.929417
chr11	44961122	44961244	genebody	chr11:44907453-44972840	TP53I11;ENSG00000175274.14;protein_coding	hypo	unmutCLL_NBCB	0.31601	0.89492	0.723697	0.902333
chr11	451563	451585	genebody	chr11:448267-491393	PTDSS2;ENSG00000174915.7;protein_coding	hypo	unmutCLL_NBCB	0.62877	0.89722	0.6255	0.87
chr11	46059837	46059924	genebody	chr11:45950870-46142985	PHF21A;ENSG00000135365.11;protein_coding	hypo	unmutCLL_NBCB	0.57033	0.99889	0.803636	0.983667
chr11	46384335	46384557	genebody	chr11:46354454-46402104	DGKZ;ENSG00000149091.11;protein_coding	hypo	unmutCLL_NBCB	0.57377	0.932	0.823009	0.961667
chr11	47586071	47586141	promoter	chr11:47487495-47587121,chr11:47586887-47606114,chr11:47586981-47595013	CELF1;ENSG00000149187.13;protein_coding,NDUFS3;ENSG00000213619.5;protein_coding,PTPMT1;ENSG00000110536.9;protein_coding	hypo	unmutCLL_NBCB	0.63025	0.98167	0.8472	0.945167
chr11	47791087	47791166	promoter	chr11:47738071-47788995	FNBP4;ENSG00000109920.8;protein_coding	hypo	unmutCLL_NBCB	0.72665	0.99522	0.9761	1
chr11	48015571	48015629	genebody	chr11:48002112-48189670	PTPRJ;ENSG00000149177.8;protein_coding	hypo	mutCLL_MBC	0.71685	0.969	0.69988	0.98756
chr11	48070080	48070173	genebody	chr11:48002112-48189670	PTPRJ;ENSG00000149177.8;protein_coding	hypo	unmutCLL_NBCB	0.64635	0.99939	0.844845	0.9952
chr11	48080496	48080590	genebody	chr11:48002112-48189670	PTPRJ;ENSG00000149177.8;protein_coding	hypo	unmutCLL_NBCB	0.44218	0.987	0.679238	0.92
chr11	5087843	5087878	promoter	chr11:5090801-5091727	OR52E1;ENSG00000273085.1;polymorphic_pseudogene	hypo	unmutCLL_NBCB	0.65987	0.945	0.6429	0.873
chr11	57423388	57423453	genebody	chr11:57416464-57429340	CLP1;ENSG00000172409.5;protein_coding	hypo	unmutCLL_NBCB	0.56746	0.99811	0.763591	0.9805
chr11	57513924	57513961	genebody	chr11:57480076-57559058,chr11:57509634-57560715,chr11:57510985-57519253	BTBD18;ENSG00000233436.3;protein_coding,RP11-691N7.6;ENSG00000254732.1;protein_coding,TMX2-CTNND1;ENSG00000254462.1;protein_coding	hypo	unmutCLL_NBCB	0.69003	0.99411	0.895889	0.935167
chr11	58158329	58158351	intergenic	NA:NA-NA	NA	hypo	unmutCLL_NBCB	0.71437	0.99844	0.88645	0.928667
chr11	60714870	60714892	genebody	chr11:60704555-60720002	SLC15A3;ENSG00000110446.5;protein_coding	hypo	mutCLL_MBC,unmutCLL_NBCB	0.67667	0.99356	0.58056	0.98878
chr11	60861297	60861419	intergenic	NA:NA-NA	NA	hypo	unmutCLL_NBCB	0.70244	0.99739	0.823195	0.96
chr11	61109990	61110128	genebody,promoter	chr11:61066922-61110068,chr11:61100681-61120767	DAK;ENSG00000149476.10;protein_coding,DDB1;ENSG00000167986.9;protein_coding	hypo	unmutCLL_NBCB	0.31437	0.99648	0.780409	0.933667
chr11	61119005	61119051	genebody	chr11:61100681-61120767,chr11:61116216-61129771	CYB561A3;ENSG00000162144.5;protein_coding,DAK;ENSG00000149476.10;protein_coding	hypo	mutCLL_MBC	0.796556	0.984333	0.72632	0.99183
chr11	61119927	61119988	genebody	chr11:61100681-61120767,chr11:61116216-61129771	CYB561A3;ENSG00000162144.5;protein_coding,DAK;ENSG00000149476.10;protein_coding	hypo	mutCLL_MBC	0.73455	0.992833	0.64676	0.97122
chr11	62224778	62224833	genebody	chr11:62201015-62323707	AHNAK;ENSG00000124942.9;protein_coding	hypo	unmutCLL_NBCB	0.669	0.99156	0.784045	0.917167
chr11	62408534	62408707	genebody	chr11:62392297-62414104	GANAB;ENSG00000089597.12;protein_coding	hypo	unmutCLL_NBCB	0.51106	0.9736	0.696937	0.9575
chr11	62815056	62815173	intergenic	NA:NA-NA	NA	hypo	unmutCLL_NBCB	0.7185	0.99833	0.852182	0.967667
chr11	64014123	64014147	promoter	chr11:64011955-64014413,chr11:64013435-64015689,chr11:64018994-64036622	PLCB3;ENSG00000149782.7;protein_coding,PPP1R14B;ENSG00000173457.6;protein_coding,RP11-783K16.5;ENSG00000256940.1;antisense	hyper	mutCLL_MBC	0.247071	0.017	0.35557	0
chr11	64119027	64119062	genebody	chr11:64107694-64125006	CCDC88B;ENSG00000168071.17;protein_coding	hypo	mutCLL_MBC	0.20135	0.86	0.461	0.90489
chr11	64119027	64119079	genebody	chr11:64107694-64125006	CCDC88B;ENSG00000168071.17;protein_coding	hypo	unmutCLL_NBCB	0.2932	0.89133	0.461	0.904889
chr11	6425897	6425977	genebody	chr11:6416354-6440644	APBB1;ENSG00000166313.14;protein_coding	hypo	mutCLL_MBC	0.477	0.982667	0.68188	0.99022
chr11	6425897	6426028	genebody	chr11:6416354-6440644	APBB1;ENSG00000166313.14;protein_coding	hypo	unmutCLL_NBCB	0.64312	0.99133	0.681879	0.990222
chr11	64529377	64529420	promoter	chr11:64513860-64527769	PYGM;ENSG00000068976.9;protein_coding	hypo	unmutCLL_NBCB	0.47809	0.99027	0.666875	0.942833
chr11	64565396	64565427	genebody	chr11:64556289-64570713	MAP4K2;ENSG00000168067.7;protein_coding	hypo	mutCLL_MBC,unmutCLL_NBCB	0.072633	0.99622	0.22533	0.86811
chr11	64610490	64610730	promoter	chr11:64590858-64612041	CDC42BPG;ENSG00000171219.8;protein_coding	hypo	unmutCLL_NBCB	0.64804	0.98833	0.763059	0.946733
chr11	65019673	65019680	intergenic	NA:NA-NA	NA	hypo	unmutCLL_NBCB	0.61347	0.99811	0.6675	0.996667
chr11	65019673	65019742	intergenic	NA:NA-NA	NA	hypo	mutCLL_MBC	0.633933	0.998111	0.61893	0.9735
chr11	65117030	65117122	genebody	chr11:65101224-65120720	DPF2;ENSG00000133884.5;protein_coding	hypo	unmutCLL_NBCB	0.65331	0.99167	0.611406	0.9842
chr11	65117039	65117122	genebody	chr11:65101224-65120720	DPF2;ENSG00000133884.5;protein_coding	hypo	mutCLL_MBC	0.613167	0.9875	0.65938	0.98207
chr11	65144878	65145023	genebody	chr11:65142662-65151172	SLC25A45;ENSG00000162241.8;protein_coding	hypo	unmutCLL_NBCB	0.72172	0.99847	0.839591	0.95775
chr11	65203589	65203666	genebody	chr11:65190244-65213011	NEAT1;ENSG00000245532.4;lincRNA	hypo	unmutCLL_NBCB	0.69872	0.98789	0.783682	0.956667
chr11	65212342	65212362	genebody	chr11:65190244-65213011	NEAT1;ENSG00000245532.4;lincRNA	hypo	unmutCLL_NBCB	0.082413	0.98675	0.40225	0.967667
chr11	65318724	65318769	genebody	chr11:65306275-65326401	LTBP3;ENSG00000168056.10;protein_coding	hypo	mutCLL_MBC	0.27745	1	0.56976	0.90067
chr11	65414628	65414779	genebody,promoter	chr11:65405567-65418401,chr11:65416662-65416724	MIR4489;ENSG00000265874.1;miRNA,SIPA1;ENSG00000213445.4;protein_coding	hypo	unmutCLL_NBCB	0.60998	0.98638	0.733818	0.958556
chr11	65546913	65546928	promoter	chr11:65543363-65548273	AP5B1;ENSG00000254470.2;protein_coding	hypo	unmutCLL_NBCB	0.72175	0.99378	0.926773	0.9745
chr11	65691289	65691326	promoter	chr11:65684278-65686588	C11orf68;ENSG00000175573.6;protein_coding	hypo	unmutCLL_NBCB	0.70993	0.99367	0.8366	0.9085
chr11	65844104	65844114	genebody	chr11:65837833-66012218	PACS1;ENSG00000175115.7;protein_coding	hypo	mutCLL_MBC,unmutCLL_NBCB	0.27925	0.99456	0.33317	0.86633
chr11	65873897	65873912	genebody	chr11:65837833-66012218	PACS1;ENSG00000175115.7;protein_coding	hypo	unmutCLL_NBCB	0.68462	0.99422	0.845409	0.997833
chr11	66083482	66083510	genebody,promoter	chr11:66080323-66086708,chr11:66081957-66084515	CD248;ENSG00000174807.3;protein_coding,RP11-867G23.13;ENSG00000254458.1;antisense	hypo	unmutCLL_NBCB	0.59558	0.95622	0.832	0.938
chr11	66097177	66097331	promoter	chr11:66101964-66107346	RP11-867G23.12;ENSG00000254756.1;antisense	hypo	unmutCLL_NBCB	0.64744	0.98607	0.676477	0.932917
chr11	66292391	66292408	genebody	chr11:66276549-66301084,chr11:66278076-66301098,chr11:66288107-66313709	BBS1;ENSG00000174483.15;protein_coding,CTD-3074O7.11;ENSG00000256349.1;protein_coding,ZDHHC24;ENSG00000174165.3;protein_coding	hypo	unmutCLL_NBCB	0.722	0.99589	0.7115	0.882167
chr11	66566413	66566442	genebody	chr11:66511921-66610987	C11orf80;ENSG00000173715.11;protein_coding	hypo	unmutCLL_NBCB	0.68543	0.969	0.808864	0.985667
chr11	66618604	66618612	genebody	chr11:66615703-66725847	PC;ENSG00000173599.9;protein_coding	hypo	mutCLL_MBC	0.46005	0.9855	0.46945	0.81567
chr11	67178866	67178971	genebody,promoter	chr11:67165653-67188654,chr11:67182438-67193078	CARNS1;ENSG00000172508.6;protein_coding,PPP1CA;ENSG00000172531.10;protein_coding	hypo	unmutCLL_NBCB	0.7238	0.99233	0.708515	0.876667
chr11	67219812	67219843	promoter	chr11:67218771-67220200,chr11:67219876-67226699	CABP4;ENSG00000175544.9;protein_coding,GPR152;ENSG00000175514.2;protein_coding	hypo	unmutCLL_NBCB	0.7076	0.98789	0.830682	0.949833
chr11	67259510	67259549	genebody	chr11:67259238-67273734	PITPNM1;ENSG00000110697.8;protein_coding	hypo	mutCLL_MBC,unmutCLL_NBCB	0.22537	0.99756	0.68309	0.96467
chr11	67970174	67970350	genebody	chr11:67922329-67981295	SUV420H1;ENSG00000110066.10;protein_coding	hypo	unmutCLL_NBCB	0.67333	0.99913	0.840777	0.953111
chr11	68139511	68139558	genebody	chr11:68080076-68216743	LRP5;ENSG00000162337.7;protein_coding	hypo	unmutCLL_NBCB	0.73733	0.99267	0.721545	0.934
chr11	68223107	68223188	promoter	chr11:68228185-68382802	PPP6R3;ENSG00000110075.10;protein_coding	hypo	mutCLL_MBC	0.368	0.9935	0.54783	0.80189
chr11	68580294	68580367	genebody	chr11:68522087-68611878	CPT1A;ENSG00000110090.8;protein_coding	hypo	unmutCLL_NBCB	0.54298	0.9878	0.773	0.96225
chr11	68646682	68646870	intergenic	NA:NA-NA	NA	hypo	unmutCLL_NBCB	0.60986	0.99453	0.882778	0.97175
chr11	68662456	68662497	genebody	chr11:68658743-68671303	MRPL21;ENSG00000197345.8;protein_coding	hypo	unmutCLL_NBCB	0.72693	0.98744	0.815227	0.9285
chr11	68705654	68705749	genebody	chr11:68671309-68708070	IGHMBP2;ENSG00000132740.4;protein_coding	hypo	unmutCLL_NBCB	0.57691	0.99493	0.743818	0.9785
chr11	68714291	68714409	promoter	chr11:68708970-68710320	RP11-757G1.5;ENSG00000255741.1;antisense	hypo	unmutCLL_NBCB	0.74391	0.99513	0.891964	0.958333
chr11	68838753	68838802	genebody	chr11:68816364-68858072	TPCN2;ENSG00000162341.11;protein_coding	hypo	unmutCLL_NBCB	0.70831	0.99367	0.884848	0.958889
chr11	68927197	68927369	genebody	chr11:68914695-68939032,chr11:68923377-68927220	RP11-554A11.8;ENSG00000261070.1;lincRNA,RP11-554A11.9;ENSG00000259799.1;antisense	hypo	unmutCLL_NBCB	0.53708	0.99807	0.843083	0.99575
chr11	69019792	69019851	intergenic	NA:NA-NA	NA	hypo	unmutCLL_NBCB	0.73395	0.98933	0.639909	0.824167
chr11	691245	691411	genebody,promoter	chr11:644232-706715,chr11:694437-727727,chr11:695427-705028	DEAF1;ENSG00000177030.12;protein_coding,EPS8L2;ENSG00000177106.10;protein_coding,TMEM80;ENSG00000177042.10;protein_coding	hypo	unmutCLL_NBCB	0.71929	0.9921	0.83735	0.958833
chr11	69311454	69311501	intergenic	NA:NA-NA	NA	hypo	unmutCLL_NBCB	0.7329	0.98889	0.884955	0.995
chr11	69458560	69458594	genebody	chr11:69455854-69469242	CCND1;ENSG00000110092.3;protein_coding	hypo	mutCLL_MBC,unmutCLL_NBCB	0.50196	0.85789	0.54639	0.80122
chr11	69484413	69484439	genebody	chr11:69467843-69490184	ORAOV1;ENSG00000149716.8;protein_coding	hypo	mutCLL_MBC	0.388167	0.999222	0.4797	0.983
chr11	69484413	69484518	genebody	chr11:69467843-69490184	ORAOV1;ENSG00000149716.8;protein_coding	hypo	unmutCLL_NBCB	0.5162	0.99633	0.624468	0.982095
chr11	698628	698759	genebody	chr11:644232-706715,chr11:694437-727727,chr11:695427-705028	DEAF1;ENSG00000177030.12;protein_coding,EPS8L2;ENSG00000177106.10;protein_coding,TMEM80;ENSG00000177042.10;protein_coding	hypo	mutCLL_MBC	0.0522333	0.995833	0.46409	0.94567
chr11	698635	698759	genebody	chr11:644232-706715,chr11:694437-727727,chr11:695427-705028	DEAF1;ENSG00000177030.12;protein_coding,EPS8L2;ENSG00000177106.10;protein_coding,TMEM80;ENSG00000177042.10;protein_coding	hypo	unmutCLL_NBCB	0.04145	0.99492	0.477394	0.961222
chr11	70226309	70226351	genebody	chr11:70116805-70230509,chr11:70218351-70244594	AP000487.5;ENSG00000246889.2;antisense,PPFIA1;ENSG00000131626.11;protein_coding	hypo	mutCLL_MBC	0.388556	0.988667	0.51882	0.81211
chr11	70677958	70678025	genebody	chr11:70313960-70963623	SHANK2;ENSG00000162105.12;protein_coding	hypo	unmutCLL_NBCB	0.65445	0.96458	0.887152	0.946111
chr11	70760533	70760596	genebody	chr11:70313960-70963623	SHANK2;ENSG00000162105.12;protein_coding	hypo	mutCLL_MBC	0.73465	0.907	0.64191	0.89844
chr11	70850824	70850946	genebody	chr11:70313960-70963623	SHANK2;ENSG00000162105.12;protein_coding	hypo	unmutCLL_NBCB	0.63157	0.94978	0.704591	0.87
chr11	71943696	71943714	genebody	chr11:71934744-71950149	INPPL1;ENSG00000165458.9;protein_coding	hypo	mutCLL_MBC	0.239278	0.953833	0.60479	0.89233
chr11	72397097	72397174	genebody,promoter	chr11:72396113-72504644,chr11:72396119-72404853	ARAP1-AS1;ENSG00000256007.1;antisense,ARAP1;ENSG00000186635.10;protein_coding	hypo	unmutCLL_NBCB	0.67108	0.97528	0.904836	0.955067
chr11	72423933	72424028	genebody	chr11:72396113-72504644	ARAP1;ENSG00000186635.10;protein_coding	hypo	unmutCLL_NBCB	0.42869	0.99011	0.722063	0.947667
chr11	72424984	72425065	genebody	chr11:72396113-72504644	ARAP1;ENSG00000186635.10;protein_coding	hypo	unmutCLL_NBCB	0.68723	0.98733	0.766182	0.98
chr11	72437685	72437710	genebody	chr11:72396113-72504644	ARAP1;ENSG00000186635.10;protein_coding	hypo	unmutCLL_NBCB	0.69432	0.9936	0.824939	0.946833
chr11	72537724	72537799	genebody	chr11:72525352-72554719	ATG16L2;ENSG00000168010.6;protein_coding	hypo	unmutCLL_NBCB	0.66526	0.98267	0.890136	0.964667
chr11	73311479	73311527	promoter	chr11:73111531-73309234	FAM168A;ENSG00000054965.6;protein_coding	hypo	mutCLL_MBC	0.732167	1	0.66845	0.99258
chr11	73311479	73311533	promoter	chr11:73111531-73309234	FAM168A;ENSG00000054965.6;protein_coding	hypo	unmutCLL_NBCB	0.7441	1	0.676025	0.992583
chr11	74457359	74457408	promoter	chr11:74459912-74553458	RNF169;ENSG00000166439.5;protein_coding	hypo	unmutCLL_NBCB	0.6476	0.99658	0.620619	0.999111
chr11	74892133	74892210	genebody	chr11:74811607-74917594	SLCO2B1;ENSG00000137491.10;protein_coding	hypo	unmutCLL_NBCB	0.73003	0.98022	0.964	0.9455
chr11	76021436	76021485	intergenic	NA:NA-NA	NA	hypo	unmutCLL_NBCB	0.71698	0.98589	0.9345	0.913833
chr11	76171787	76171797	genebody	chr11:76155966-76264069	C11orf30;ENSG00000158636.12;protein_coding	hypo	unmutCLL_NBCB	0.7273	0.997	0.899214	0.991333
chr11	77284085	77284178	genebody	chr11:77225980-77348850	CLNS1A;ENSG00000074201.4;protein_coding	hypo	unmutCLL_NBCB	0.63964	0.99367	0.67203	0.981167
chr11	78006315	78006406	genebody	chr11:77926342-78129394	GAB2;ENSG00000033327.8;protein_coding	hypo	unmutCLL_NBCB	0.068677	0.99856	0.35745	0.987
chr11	79195592	79195669	intergenic	NA:NA-NA	NA	hypo	unmutCLL_NBCB	0.68977	0.98833	0.786955	1
chr11	80674492	80674551	intergenic	NA:NA-NA	NA	hypo	unmutCLL_NBCB	0.73307	0.99622	0.589944	0.903833
chr11	83383375	83383461	genebody	chr11:83166054-85338966,chr11:83354644-83436433	DLG2;ENSG00000150672.12;protein_coding,RP11-160H12.2;ENSG00000255311.1;antisense	hypo	unmutCLL_NBCB	0.66148	0.97733	0.831045	0.8995
chr11	86628097	86628142	genebody	chr11:86502100-86663952,chr11:86603255-86636079	PRSS23;ENSG00000150687.7;protein_coding,RP11-736K20.5;ENSG00000255471.1;antisense	hypo	mutCLL_MBC	0.816571	0.992333	0.65898	0.94489
chr11	88728567	88728636	genebody	chr11:88237743-88799113	GRM5;ENSG00000168959.10;protein_coding	hypo	unmutCLL_NBCB	0.70581	0.96308	0.755606	0.907
chr11	89082310	89082378	genebody	chr11:89057523-89322779	NOX4;ENSG00000086991.8;protein_coding	hypo	unmutCLL_NBCB	0.66142	0.991	0.829227	0.925
chr11	89446205	89446222	genebody	chr11:89443466-89451040	TRIM77;ENSG00000214414.5;protein_coding	hypo	unmutCLL_NBCB	0.55633	0.96578	0.810136	0.945
chr11	90186132	90186209	genebody	chr11:89984399-90648220	DISC1FP1;ENSG00000261645.1;processed_transcript	hypo	unmutCLL_NBCB	0.64877	0.97578	0.636591	0.932833
chr11	90211133	90211179	genebody	chr11:89984399-90648220	DISC1FP1;ENSG00000261645.1;processed_transcript	hypo	unmutCLL_NBCB	0.70022	0.97844	0.874409	0.932667
chr11	91089275	91089383	intergenic	NA:NA-NA	NA	hypo	unmutCLL_NBCB	0.67716	0.97656	0.865727	0.908167
chr11	92490307	92490340	genebody	chr11:92085261-92629618,chr11:92481897-92500033	FAT3;ENSG00000165323.11;protein_coding,RP11-203F8.1;ENSG00000255506.1;antisense	hypo	unmutCLL_NBCB	0.69595	1	0.769333	0.889889
chr11	929847	930013	genebody	chr11:924893-1012239	AP2A2;ENSG00000183020.9;protein_coding	hypo	unmutCLL_NBCB	0.71992	1	0.779818	0.989917
chr11	9413815	9414009	genebody	chr11:9406168-9469673	IPO7;ENSG00000205339.5;protein_coding	hypo	unmutCLL_NBCB	0.73185	0.99242	0.842137	0.975143
chr11	94840915	94840948	genebody	chr11:94822973-94865809	ENDOD1;ENSG00000149218.4;protein_coding	hypo	mutCLL_MBC	0.1803	0.985833	0.50646	0.97167
chr11	94840925	94841177	genebody	chr11:94822973-94865809	ENDOD1;ENSG00000149218.4;protein_coding	hypo	unmutCLL_NBCB	0.4849	0.99743	0.767796	0.990649
chr11	94841128	94841177	genebody	chr11:94822973-94865809	ENDOD1;ENSG00000149218.4;protein_coding	hypo	mutCLL_MBC	0.451062	0.9955	0.68797	0.97211
chr11	98244040	98244057	intergenic	NA:NA-NA	NA	hypo	mutCLL_MBC	0.817056	0.9785	0.64815	0.90311
chr11	98267181	98267230	intergenic	NA:NA-NA	NA	hypo	unmutCLL_NBCB	0.6192	0.99678	0.7297	0.947333
chr12	10243113	10243153	genebody	chr12:10222152-10264226	CLEC1A;ENSG00000150048.6;protein_coding	hypo	unmutCLL_NBCB	0.5594	1	0.91595	0.995833
chr12	104230765	104230824	genebody,promoter	chr12:104164230-104234975,chr12:104235228-104238442	NT5DC3;ENSG00000111696.7;protein_coding,RP11-650K20.3;ENSG00000257327.1;protein_coding	hypo	mutCLL_MBC	0.88675	0.991333	0.67271	0.95944
chr12	104464681	104464878	genebody	chr12:104458234-104498639	HCFC2;ENSG00000111727.7;protein_coding	hypo	unmutCLL_NBCB	0.73172	0.99733	0.84742	0.9905
chr12	1044739	1044847	genebody	chr12:1021242-1099219	RAD52;ENSG00000002016.12;protein_coding	hypo	unmutCLL_NBCB	0.74235	0.99287	0.858718	0.982083
chr12	104666966	104666989	genebody	chr12:104609556-104744061,chr12:104656091-104674500	RP11-818F20.5;ENSG00000257732.1;antisense,TXNRD1;ENSG00000198431.11;protein_coding	hypo	unmutCLL_NBCB	0.7274	0.99878	0.914	0.9595
chr12	104886531	104886734	genebody	chr12:104849072-105155792	CHST11;ENSG00000171310.6;protein_coding	hypo	unmutCLL_NBCB	0.66242	1	0.889672	0.998238
chr12	106621273	106621358	intergenic	NA:NA-NA	NA	hypo	unmutCLL_NBCB	0.099217	0.99178	0.158591	0.887667
chr12	106640652	106640675	genebody,promoter	chr12:106631654-106698057,chr12:106639390-106640734	CKAP4;ENSG00000136026.9;protein_coding,RP11-651L5.2;ENSG00000258355.1;sense_intronic	hypo	mutCLL_MBC	0.3657	0.7575	0.20557	0.78211
chr12	106640670	106640732	genebody,promoter	chr12:106631654-106698057,chr12:106639390-106640734	CKAP4;ENSG00000136026.9;protein_coding,RP11-651L5.2;ENSG00000258355.1;sense_intronic	hypo	unmutCLL_NBCB	0.43793	0.91211	0.255773	0.885167
chr12	108969671	108969725	intergenic	NA:NA-NA	NA	hypo	unmutCLL_NBCB	0.20355	0.99578	0.6873	0.962167
chr12	110430110	110430230	genebody	chr12:110367606-110434194	GIT2;ENSG00000139436.16;protein_coding	hypo	unmutCLL_NBCB	0.71513	0.99487	0.769242	0.957417
chr12	111046182	111046301	intergenic	NA:NA-NA	NA	hypo	mutCLL_MBC,unmutCLL_NBCB	0.53183	0.97233	0.50352	0.90856
chr12	111117281	111117301	genebody	chr12:111065645-111142755	HVCN1;ENSG00000122986.9;protein_coding	hypo	unmutCLL_NBCB	0.70533	0.98567	0.862857	0.996833
chr12	111865245	111865314	genebody	chr12:111843751-111889427	SH2B3;ENSG00000111252.6;protein_coding	hypo	unmutCLL_NBCB	0.67199	0.97233	0.862273	0.970167
chr12	113519056	113519127	genebody	chr12:113494513-113535833	DTX1;ENSG00000135144.3;protein_coding	hypo	unmutCLL_NBCB	0.25965	0.98592	0.632093	0.993444
chr12	113519080	113519127	genebody	chr12:113494513-113535833	DTX1;ENSG00000135144.3;protein_coding	hypo	mutCLL_MBC	0.32785	0.993333	0.57205	0.97533
chr12	113599081	113599115	genebody,promoter	chr12:113594569-113594666,chr12:113594978-113623284	DDX54;ENSG00000123064.8;protein_coding,Y_RNA;ENSG00000199899.1;misc_RNA	hypo	unmutCLL_NBCB	0.32463	0.99825	0.824267	0.948778
chr12	113607752	113607860	genebody	chr12:113594978-113623284	DDX54;ENSG00000123064.8;protein_coding	hypo	unmutCLL_NBCB	0.70773	0.99658	0.773871	0.996333
chr12	113770525	113770593	genebody	chr12:113736563-113797298	SLC8B1;ENSG00000089060.7;protein_coding	hypo	unmutCLL_NBCB	0.61287	0.92711	0.736045	0.954333
chr12	113977442	113977515	intergenic	NA:NA-NA	NA	hypo	unmutCLL_NBCB	0.72747	0.983	0.910591	0.931667
chr12	1149749	1149817	genebody	chr12:1099674-1605099	ERC1;ENSG00000082805.15;protein_coding	hypo	unmutCLL_NBCB	0.53931	0.98622	0.790697	0.9875
chr12	115319174	115319206	intergenic	NA:NA-NA	NA	hypo	unmutCLL_NBCB	0.63213	0.88833	0.807591	0.883333
chr12	116017310	116017431	genebody	chr12:116007468-116019544	RP11-1028N23.3;ENSG00000258108.1;lincRNA	hypo	unmutCLL_NBCB	0.71299	0.97122	0.869409	0.982833
chr12	116500439	116500545	genebody	chr12:116395710-116715143	MED13L;ENSG00000123066.3;protein_coding	hypo	unmutCLL_NBCB	0.74087	0.99717	0.888567	0.982444
chr12	116696301	116696378	genebody,promoter	chr12:116395710-116715143,chr12:116693687-116693793	AC060226.1;ENSG00000263768.1;miRNA,MED13L;ENSG00000123066.3;protein_coding	hypo	mutCLL_MBC	0.395058	0.994	0.51558	0.98113
chr12	116696307	116696378	genebody,promoter	chr12:116395710-116715143,chr12:116693687-116693793	AC060226.1;ENSG00000263768.1;miRNA,MED13L;ENSG00000123066.3;protein_coding	hypo	unmutCLL_NBCB	0.4343	0.99508	0.578333	0.985556
chr12	116787676	116787881	intergenic	NA:NA-NA	NA	hypo	unmutCLL_NBCB	0.46831	0.99617	0.650067	0.9656
chr12	116787680	116787881	intergenic	NA:NA-NA	NA	hypo	mutCLL_MBC	0.42782	0.9965	0.71504	0.9726
chr12	116934952	116935118	intergenic	NA:NA-NA	NA	hypo	unmutCLL_NBCB	0.7389	0.99619	0.896535	0.95025
chr12	116995555	116995722	promoter	chr12:116997185-117014425	MAP1LC3B2;ENSG00000171471.5;protein_coding	hypo	mutCLL_MBC,unmutCLL_NBCB	0.30649	0.9805	0.58075	0.99283
chr12	117099409	117099497	promoter	chr12:117099386-117135870	RP11-497G19.1;ENSG00000257883.1;lincRNA	hypo	unmutCLL_NBCB	0.74143	0.99789	0.819682	0.952
chr12	117471440	117471553	intergenic	NA:NA-NA	NA	hypo	unmutCLL_NBCB	0.6278	0.98522	0.843467	0.975111
chr12	117482498	117482557	genebody	chr12:117476727-117537284	TESC;ENSG00000088992.13;protein_coding	hypo	unmutCLL_NBCB	0.6177	0.98944	0.826273	0.9425
chr12	117630426	117630503	promoter	chr12:117581145-117628336	FBXO21;ENSG00000135108.10;protein_coding	hypo	unmutCLL_NBCB	0.56814	0.97556	0.95295	0.990333
chr12	118033417	118033456	genebody	chr12:117890816-118406788	KSR2;ENSG00000171435.9;protein_coding	hypo	unmutCLL_NBCB	0.71444	0.984	0.817429	0.919
chr12	11809629	11809690	genebody	chr12:11802787-12048336	ETV6;ENSG00000139083.6;protein_coding	hypo	mutCLL_MBC,unmutCLL_NBCB	0.24832	0.94067	0.70037	0.99178
chr12	118316054	118316168	genebody	chr12:117890816-118406788	KSR2;ENSG00000171435.9;protein_coding	hypo	unmutCLL_NBCB	0.13463	0.92356	0.6861	0.886
chr12	118462004	118462069	genebody	chr12:118451392-118470935	RFC5;ENSG00000111445.9;protein_coding	hypo	unmutCLL_NBCB	0.72238	0.99742	0.881242	0.964222
chr12	118473961	118474000	genebody	chr12:118470711-118500235	WSB2;ENSG00000176871.4;protein_coding	hypo	unmutCLL_NBCB	0.64988	0.99844	0.97365	0.996667
chr12	118482901	118483024	genebody	chr12:118470711-118500235	WSB2;ENSG00000176871.4;protein_coding	hypo	unmutCLL_NBCB	0.14534	0.98761	0.731145	0.992067
chr12	118482961	118482984	genebody	chr12:118470711-118500235	WSB2;ENSG00000176871.4;protein_coding	hypo	mutCLL_MBC	0.069	0.979167	0.66582	0.99056
chr12	118494560	118494597	genebody	chr12:118470711-118500235	WSB2;ENSG00000176871.4;protein_coding	hypo	unmutCLL_NBCB	0.47442	0.99093	0.773969	0.984667
chr12	118583227	118583241	genebody	chr12:118573662-118583389	PEBP1;ENSG00000089220.4;protein_coding	hypo	mutCLL_MBC,unmutCLL_NBCB	0.16123	1	0.28806	0.94489
chr12	11975047	11975093	genebody	chr12:11802787-12048336	ETV6;ENSG00000139083.6;protein_coding	hypo	unmutCLL_NBCB	0.12127	0.98944	0.20975	0.9615
chr12	120887381	120887538	genebody,promoter	chr12:120876000-120897809,chr12:120881763-120884215,chr12:120884240-120899389	AL021546.6;ENSG00000111780.8;protein_coding,GATC;ENSG00000257218.1;protein_coding,TRIAP1;ENSG00000170855.3;protein_coding	hypo	mutCLL_MBC	0.67785	0.982	0.67843	0.93333
chr12	121259126	121259194	genebody	chr12:121200312-121342174	SPPL3;ENSG00000157837.11;protein_coding	hypo	unmutCLL_NBCB	0.081958	0.99556	0.1529	0.993444
chr12	121389546	121389579	intergenic	NA:NA-NA	NA	hypo	unmutCLL_NBCB	0.7076	0.99389	0.730182	0.951667
chr12	121572435	121572485	promoter	chr12:121570621-121623876	P2RX7;ENSG00000089041.12;protein_coding	hypo	mutCLL_MBC	0.471667	0.971333	0.576	0.93522
chr12	121572479	121572489	promoter	chr12:121570621-121623876	P2RX7;ENSG00000089041.12;protein_coding	hypo	unmutCLL_NBCB	0.19025	0.97567	0.469682	0.912333
chr12	121691886	121692116	genebody	chr12:121675496-121736111	CAMKK2;ENSG00000110931.14;protein_coding	hypo	unmutCLL_NBCB	0.66453	0.9965	0.879307	0.993333
chr12	121728713	121728782	genebody	chr12:121675496-121736111	CAMKK2;ENSG00000110931.14;protein_coding	hypo	mutCLL_MBC,unmutCLL_NBCB	0.47479	0.95507	0.52958	0.8738
chr12	121962879	121962923	genebody	chr12:121866899-122018920	KDM2B;ENSG00000089094.12;protein_coding	hypo	unmutCLL_NBCB	0.71552	0.99575	0.738955	0.985556
chr12	121999796	121999932	genebody	chr12:121866899-122018920	KDM2B;ENSG00000089094.12;protein_coding	hypo	unmutCLL_NBCB	0.59023	0.99533	0.833282	0.979417
chr12	122058845	122058938	intergenic	NA:NA-NA	NA	hypo	unmutCLL_NBCB	0.728	0.98667	0.875318	0.956889
chr12	122117766	122117805	intergenic	NA:NA-NA	NA	hypo	unmutCLL_NBCB	0.73903	0.99956	0.8575	0.9855
chr12	122311596	122311617	intergenic	NA:NA-NA	NA	hypo	mutCLL_MBC,unmutCLL_NBCB	0.49999	0.99	0.55754	0.99533
chr12	122489423	122489544	genebody	chr12:122457327-122499948	BCL7A;ENSG00000110987.4;protein_coding	hypo	unmutCLL_NBCB	0.69732	0.995	0.881848	0.948222
chr12	122618347	122618389	genebody	chr12:122516627-122631894	MLXIP;ENSG00000175727.9;protein_coding	hypo	unmutCLL_NBCB	0.67214	0.99656	0.76475	0.960167
chr12	122878760	122878905	genebody,promoter	chr12:122755978-122907179,chr12:122880088-122885404	CLIP1;ENSG00000130779.15;protein_coding,RP11-450K4.1;ENSG00000257097.1;lincRNA	hypo	unmutCLL_NBCB	0.58092	0.98833	0.672867	0.956
chr12	123042655	123042720	genebody	chr12:123011792-123110943	KNTC1;ENSG00000184445.7;protein_coding	hypo	mutCLL_MBC,unmutCLL_NBCB	0.47743	0.998	0.53742	0.96111
chr12	123177843	123177898	genebody	chr12:123104823-123215390,chr12:123171671-123200526	HCAR1;ENSG00000196917.4;protein_coding,RP11-324E6.6;ENSG00000256249.1;lincRNA	hypo	unmutCLL_NBCB	0.65275	1	0.815286	0.890667
chr12	123413211	123413275	genebody	chr12:123405497-123466196	ABCB9;ENSG00000150967.13;protein_coding	hypo	unmutCLL_NBCB	0.7226	0.99578	0.799318	0.9415
chr12	123417824	123417956	genebody	chr12:123405497-123466196	ABCB9;ENSG00000150967.13;protein_coding	hypo	unmutCLL_NBCB	0.64167	0.99142	0.85997	0.962889
chr12	123615054	123615108	genebody	chr12:123468026-123634562	PITPNM2;ENSG00000090975.8;protein_coding	hypo	unmutCLL_NBCB	0.63257	0.967	0.88778	0.970417
chr12	123634146	123634211	promoter	chr12:123468026-123634562	PITPNM2;ENSG00000090975.8;protein_coding	hypo	unmutCLL_NBCB	0.67999	0.96267	0.9935	0.989333
chr12	123892641	123892693	genebody	chr12:123868319-123893905	SETD8;ENSG00000183955.8;protein_coding	hypo	unmutCLL_NBCB	0.72988	0.99617	0.821333	0.966222
chr12	123897465	123897482	intergenic	NA:NA-NA	NA	hypo	unmutCLL_NBCB	0.63955	0.99567	0.7568	0.844
chr12	124845174	124845256	genebody	chr12:124808960-125052135	NCOR2;ENSG00000196498.9;protein_coding	hypo	unmutCLL_NBCB	0.5368	0.98739	0.737744	0.953067
chr12	124959378	124959430	genebody	chr12:124808960-125052135	NCOR2;ENSG00000196498.9;protein_coding	hypo	unmutCLL_NBCB	0.68527	0.99822	0.712227	0.998167
chr12	124980112	124980170	genebody	chr12:124808960-125052135	NCOR2;ENSG00000196498.9;protein_coding	hypo	mutCLL_MBC	0.30165	0.9995	0.60233	0.966
chr12	124982157	124982253	genebody	chr12:124808960-125052135	NCOR2;ENSG00000196498.9;protein_coding	hypo	mutCLL_MBC,unmutCLL_NBCB	0.39838	0.9935	0.65326	0.96733
chr12	125282437	125282479	genebody	chr12:125261401-125367214	SCARB1;ENSG00000073060.11;protein_coding	hypo	unmutCLL_NBCB	0.62487	0.99811	0.756045	0.852833
chr12	125318346	125318371	genebody	chr12:125261401-125367214	SCARB1;ENSG00000073060.11;protein_coding	hypo	unmutCLL_NBCB	0.5954	0.99144	0.59125	0.949833
chr12	125444908	125445050	genebody	chr12:125431370-125473668	DHX37;ENSG00000150990.3;protein_coding	hypo	unmutCLL_NBCB	0.70299	0.99247	0.833455	0.972667
chr12	125550870	125550911	promoter	chr12:125549924-125627873	AACS;ENSG00000081760.12;protein_coding	hypo	unmutCLL_NBCB	0.51885	0.97242	0.690238	0.941
chr12	126094081	126094176	genebody	chr12:125671381-126146917	TMEM132B;ENSG00000139364.6;protein_coding	hypo	unmutCLL_NBCB	0.6856	0.99156	0.776591	0.828333
chr12	126148381	126148426	intergenic	NA:NA-NA	NA	hypo	unmutCLL_NBCB	0.72923	0.99133	0.737	0.934
chr12	127896795	127896890	intergenic	NA:NA-NA	NA	hypo	unmutCLL_NBCB	0.7151	0.996	0.796818	0.923167
chr12	12809253	12809298	intergenic	NA:NA-NA	NA	hypo	unmutCLL_NBCB	0.6323	0.96767	0.716875	0.915167
chr12	131618037	131618136	genebody	chr12:131438451-131626014	GPR133;ENSG00000111452.8;protein_coding	hypo	unmutCLL_NBCB	0.68036	0.95967	0.783212	0.8765
chr12	131623353	131623433	genebody	chr12:131438451-131626014	GPR133;ENSG00000111452.8;protein_coding	hypo	unmutCLL_NBCB	0.61621	0.99052	0.795418	0.927278
chr12	132260569	132260602	genebody	chr12:132195625-132284282	SFSWAP;ENSG00000061936.5;protein_coding	hypo	unmutCLL_NBCB	0.49427	0.99275	0.4892	0.972778
chr12	132260576	132260602	genebody	chr12:132195625-132284282	SFSWAP;ENSG00000061936.5;protein_coding	hypo	mutCLL_MBC	0.6115	1	0.40301	0.95156
chr12	132282259	132282355	genebody	chr12:132195625-132284282	SFSWAP;ENSG00000061936.5;protein_coding	hypo	unmutCLL_NBCB	0.7071	0.99583	0.862709	0.9652
chr12	132353098	132353168	intergenic	NA:NA-NA	NA	hypo	unmutCLL_NBCB	0.57834	0.9492	0.753939	0.848833
chr12	132435701	132435815	promoter	chr12:132434507-132565005	EP400;ENSG00000183495.9;protein_coding	hypo	unmutCLL_NBCB	0.72211	0.99033	0.907852	0.901833
chr12	132558763	132558793	genebody	chr12:132434507-132565005	EP400;ENSG00000183495.9;protein_coding	hypo	mutCLL_MBC	0.4079	0.9995	0.6857	0.99856
chr12	132558763	132558839	genebody	chr12:132434507-132565005	EP400;ENSG00000183495.9;protein_coding	hypo	unmutCLL_NBCB	0.34013	0.99975	0.685697	0.998556
chr12	132671885	132671903	promoter	chr12:132671286-132674240,chr12:132674757-132675542	RP13-977J11.2;ENSG00000256576.1;lincRNA,RP13-977J11.8;ENSG00000256312.1;lincRNA	hypo	unmutCLL_NBCB	0.59719	0.94589	0.734273	0.898167
chr12	133145006	133145051	genebody	chr12:133066136-133161774	FBRSL1;ENSG00000112787.8;protein_coding	hypo	unmutCLL_NBCB	0.72032	1	0.849515	0.985556
chr12	13871378	13871430	genebody	chr12:13693164-14133053	GRIN2B;ENSG00000273079.1;protein_coding	hypo	unmutCLL_NBCB	0.68606	0.95	0.768318	0.888
chr12	14720073	14720155	promoter	chr12:14656594-14721283,chr12:14720683-14772689	PLBD1;ENSG00000121316.6;protein_coding,RP11-695J4.2;ENSG00000256751.1;antisense	hypo	mutCLL_MBC,unmutCLL_NBCB	0.38842	0.839	0.47209	0.76767
chr12	1554538	1554555	genebody	chr12:1099674-1605099	ERC1;ENSG00000082805.15;protein_coding	hypo	mutCLL_MBC,unmutCLL_NBCB	0.65914	0.99233	0.71675	0.99044
chr12	15900808	15900845	genebody	chr12:15773091-16035263	EPS8;ENSG00000151491.8;protein_coding	hypo	unmutCLL_NBCB	0.66463	0.98567	0.8077	0.919667
chr12	15988211	15988270	genebody	chr12:15773091-16035263	EPS8;ENSG00000151491.8;protein_coding	hypo	unmutCLL_NBCB	0.6689	0.97178	0.714364	0.916667
chr12	16618493	16618514	genebody	chr12:16500075-16762193	MGST1;ENSG00000008394.8;protein_coding	hypo	unmutCLL_NBCB	0.69211	0.97022	0.822455	0.954667
chr12	16735701	16735778	genebody	chr12:16500075-16762193,chr12:16701306-16763528	LMO3;ENSG00000048540.10;protein_coding,MGST1;ENSG00000008394.8;protein_coding	hypo	unmutCLL_NBCB	0.69124	0.98989	0.642091	0.900167
chr12	1688501	1688637	genebody	chr12:1639056-1756409,chr12:1675158-1703331	FBXL14;ENSG00000171823.6;protein_coding,WNT5B;ENSG00000111186.8;protein_coding	hypo	unmutCLL_NBCB	0.62402	0.9976	0.854159	0.977167
chr12	1711847	1711912	genebody	chr12:1639056-1756409	WNT5B;ENSG00000111186.8;protein_coding	hypo	unmutCLL_NBCB	0.1731	0.99556	0.590333	0.867167
chr12	17422554	17422609	intergenic	NA:NA-NA	NA	hypo	unmutCLL_NBCB	0.66353	0.93744	0.907222	0.982667
chr12	19332452	19332507	genebody,promoter	chr12:19282647-19529334,chr12:19329224-19329523	PLEKHA5;ENSG00000052126.10;protein_coding,RN7SL459P;ENSG00000240993.2;misc_RNA	hypo	unmutCLL_NBCB	0.68553	0.99878	0.675944	0.925167
chr12	2028273	2028354	promoter	chr12:1901122-2028002,chr12:2027116-2032033	CACNA2D4;ENSG00000151062.10;protein_coding,RP5-1096D14.3;ENSG00000256706.1;antisense	hypo	unmutCLL_NBCB	0.64448	0.99	0.6814	0.921444
chr12	2348737	2348839	genebody	chr12:2079951-2802108	CACNA1C;ENSG00000151067.16;protein_coding	hypo	unmutCLL_NBCB	0.69528	0.95422	0.758667	0.905667
chr12	2351799	2351897	genebody	chr12:2079951-2802108	CACNA1C;ENSG00000151067.16;protein_coding	hypo	unmutCLL_NBCB	0.61885	0.98956	0.795	0.9745
chr12	23778686	23778831	genebody	chr12:23682439-24103966	SOX5;ENSG00000134532.11;protein_coding	hypo	unmutCLL_NBCB	0.71005	0.99006	0.698288	0.999267
chr12	23977451	23977551	genebody	chr12:23682439-24103966	SOX5;ENSG00000134532.11;protein_coding	hypo	unmutCLL_NBCB	0.74159	1	0.859227	0.993111
chr12	23978218	23978464	genebody	chr12:23682439-24103966	SOX5;ENSG00000134532.11;protein_coding	hypo	unmutCLL_NBCB	0.70704	0.99203	0.80687	0.973
chr12	2413590	2413657	genebody	chr12:2079951-2802108	CACNA1C;ENSG00000151067.16;protein_coding	hypo	unmutCLL_NBCB	0.60738	0.96425	0.816967	0.901556
chr12	24193526	24193587	intergenic	NA:NA-NA	NA	hypo	unmutCLL_NBCB	0.6355	0.98511	0.826045	0.997333
chr12	24224526	24224660	intergenic	NA:NA-NA	NA	hypo	unmutCLL_NBCB	0.67157	0.98867	0.784811	0.996333
chr12	24369272	24369333	genebody	chr12:24366189-24715524	RP11-444D3.1;ENSG00000255864.1;lincRNA	hypo	mutCLL_MBC	0.65142	0.992333	0.55466	0.994
chr12	24582020	24582066	genebody	chr12:24366189-24715524	RP11-444D3.1;ENSG00000255864.1;lincRNA	hypo	unmutCLL_NBCB	0.69837	0.99689	0.840636	0.982667
chr12	25050646	25050738	genebody,promoter	chr12:24964294-25102393,chr12:25055242-25057615	AC026310.1;ENSG00000268865.1;protein_coding,BCAT1;ENSG00000060982.10;protein_coding	hypo	mutCLL_MBC	0.77795	0.996833	0.70606	0.95656
chr12	25168984	25169053	genebody,promoter	chr12:25164348-25173827,chr12:25173935-25261268	LRMP;ENSG00000118308.10;protein_coding,RP11-713N11.5;ENSG00000258879.1;lincRNA	hypo	unmutCLL_NBCB	0.60571	0.99289	0.751879	0.978
chr12	2773146	2773200	genebody	chr12:2079951-2802108	CACNA1C;ENSG00000151067.16;protein_coding	hypo	mutCLL_MBC	0.76042	0.997467	0.73422	0.98433
chr12	27997418	27997521	intergenic	NA:NA-NA	NA	hypo	unmutCLL_NBCB	0.74311	1	0.787273	0.932667
chr12	31896490	31896638	intergenic	NA:NA-NA	NA	hypo	mutCLL_MBC,unmutCLL_NBCB	0.49776	0.989	0.61658	0.98138
chr12	31980167	31980303	intergenic	NA:NA-NA	NA	hypo	unmutCLL_NBCB	0.7194	0.99278	0.933591	0.9995
chr12	33050015	33050034	promoter	chr12:32943678-33049774	PKP2;ENSG00000057294.9;protein_coding	hyper	unmutCLL_NBCB	0.34183	0.034111	0.339364	0.126167
chr12	33090665	33090734	intergenic	NA:NA-NA	NA	hypo	unmutCLL_NBCB	0.72358	0.97867	0.865455	0.9375
chr12	3435914	3435932	intergenic	NA:NA-NA	NA	hypo	unmutCLL_NBCB	0.6481	0.93989	0.786682	0.896167
chr12	39511989	39512044	intergenic	NA:NA-NA	NA	hypo	unmutCLL_NBCB	0.54893	0.94489	0.841182	0.9935
chr12	40719990	40720040	genebody	chr12:40590545-40763087	LRRK2;ENSG00000188906.9;protein_coding	hypo	unmutCLL_NBCB	0.51191	0.97189	0.697071	0.953167
chr12	4076887	4076987	intergenic	NA:NA-NA	NA	hypo	unmutCLL_NBCB	0.53499	0.99925	0.616682	0.913444
chr12	4076940	4076987	intergenic	NA:NA-NA	NA	hypo	mutCLL_MBC	0.5738	0.9985	0.52245	0.868
chr12	42041592	42041624	intergenic	NA:NA-NA	NA	hypo	unmutCLL_NBCB	0.68358	0.99756	0.8009	0.853
chr12	42727503	42727578	genebody	chr12:42632248-42853517	PPHLN1;ENSG00000134283.13;protein_coding	hypo	unmutCLL_NBCB	0.71899	0.99729	0.74361	0.989238
chr12	42846429	42846450	genebody,promoter	chr12:42632248-42853517,chr12:42848521-42848623	PPHLN1;ENSG00000134283.13;protein_coding,Y_RNA;ENSG00000207142.1;misc_RNA	hypo	unmutCLL_NBCB	0.21051	0.99822	0.4817	0.982167
chr12	42847611	42847634	genebody,promoter	chr12:42632248-42853517,chr12:42848521-42848623	PPHLN1;ENSG00000134283.13;protein_coding,Y_RNA;ENSG00000207142.1;misc_RNA	hypo	unmutCLL_NBCB	0.20299	0.98578	0.4534	0.9995
chr12	42848907	42849030	genebody,promoter	chr12:42632248-42853517,chr12:42848521-42848623,chr12:42853167-42859930	PPHLN1;ENSG00000134283.13;protein_coding,RP11-328C8.4;ENSG00000257225.1;antisense,Y_RNA;ENSG00000207142.1;misc_RNA	hypo	mutCLL_MBC	0.23465	0.997278	0.52284	0.95971
chr12	42848907	42849042	genebody,promoter	chr12:42632248-42853517,chr12:42848521-42848623,chr12:42853167-42859930	PPHLN1;ENSG00000134283.13;protein_coding,RP11-328C8.4;ENSG00000257225.1;antisense,Y_RNA;ENSG00000207142.1;misc_RNA	hypo	unmutCLL_NBCB	0.2118	0.9945	0.534567	0.959714
chr12	42849564	42849666	genebody,promoter	chr12:42632248-42853517,chr12:42848521-42848623,chr12:42853167-42859930	PPHLN1;ENSG00000134283.13;protein_coding,RP11-328C8.4;ENSG00000257225.1;antisense,Y_RNA;ENSG00000207142.1;misc_RNA	hypo	unmutCLL_NBCB	0.5949	0.999	0.852773	0.949333
chr12	4395883	4396003	genebody	chr12:4382937-4414516	CCND2;ENSG00000118971.3;protein_coding	hypo	unmutCLL_NBCB	0.6141	0.99956	0.806273	0.957667
chr12	45885724	45885815	genebody	chr12:45875653-46004403	RP11-352M15.1;ENSG00000257657.2;lincRNA	hypo	unmutCLL_NBCB	0.71247	0.99078	0.882727	0.959833
chr12	47708173	47708247	intergenic	NA:NA-NA	NA	hypo	unmutCLL_NBCB	0.60225	1	0.892773	0.999667
chr12	48195934	48196037	genebody	chr12:48176504-48226915	HDAC7;ENSG00000061273.13;protein_coding	hypo	mutCLL_MBC	0.272342	0.8985	0.33983	0.86411
chr12	48259992	48260050	genebody	chr12:48235319-48336831	VDR;ENSG00000111424.6;protein_coding	hypo	mutCLL_MBC,unmutCLL_NBCB	0.57732	0.9944	0.59084	0.99693
chr12	48490516	48490533	genebody	chr12:48436680-48500091	SENP1;ENSG00000079387.9;protein_coding	hypo	mutCLL_MBC,unmutCLL_NBCB	0.705	1	0.73332	1
chr12	49103764	49103834	genebody	chr12:49082246-49110681	CCNT1;ENSG00000129315.5;protein_coding	hypo	unmutCLL_NBCB	0.46776	0.98956	0.71235	0.9445
chr12	49499452	49499567	genebody	chr12:49490918-49504683	LMBR1L;ENSG00000139636.11;protein_coding	hypo	unmutCLL_NBCB	0.57873	0.98183	0.815758	0.959111
chr12	49935515	49935586	genebody	chr12:49932939-49952091	KCNH3;ENSG00000135519.6;protein_coding	hypo	mutCLL_MBC,unmutCLL_NBCB	0.096404	0.98533	0.23434	0.94689
chr12	50159528	50159574	intergenic	NA:NA-NA	NA	hypo	mutCLL_MBC	0.2158	1	0.53515	0.92967
chr12	50647605	50647734	genebody,promoter	chr12:50569570-50677329,chr12:50650020-50650127	LIMA1;ENSG00000050405.9;protein_coding,RNU6-1093P;ENSG00000212496.1;snRNA	hypo	unmutCLL_NBCB	0.40195	0.86022	0.746364	0.956667
chr12	50928314	50928441	genebody	chr12:50898767-51142450	DIP2B;ENSG00000066084.8;protein_coding	hypo	mutCLL_MBC,unmutCLL_NBCB	0.20822	0.99327	0.29774	0.93813
chr12	51324457	51324525	genebody	chr12:51317254-51326300	METTL7A;ENSG00000185432.10;protein_coding	hypo	mutCLL_MBC,unmutCLL_NBCB	0.55525	0.9775	0.62173	0.93117
chr12	53482492	53482609	intergenic	NA:NA-NA	NA	hypo	unmutCLL_NBCB	0.73436	0.993	0.894	0.981333
chr12	5442511	5442518	genebody	chr12:5399645-5492819	RP11-1038A11.3;ENSG00000256417.1;lincRNA	hypo	unmutCLL_NBCB	0.6617	0.99778	0.730357	0.9435
chr12	54938609	54938642	promoter	chr12:54936894-54937889,chr12:54943133-54973023	PDE1B;ENSG00000123360.7;protein_coding,RP11-1049A21.2;ENSG00000257824.1;antisense	hypo	unmutCLL_NBCB	0.6197	0.98189	0.703091	0.929167
chr12	5555939	5556057	genebody	chr12:5541277-5630702	NTF3;ENSG00000185652.7;protein_coding	hypo	unmutCLL_NBCB	0.68332	0.99642	0.692879	0.889556
chr12	5565240	5565365	genebody	chr12:5541277-5630702	NTF3;ENSG00000185652.7;protein_coding	hypo	mutCLL_MBC,unmutCLL_NBCB	0.5881	0.98556	0.59613	0.92667
chr12	56324437	56324444	genebody,promoter	chr12:56295196-56326402,chr12:56321102-56347811	DGKA;ENSG00000065357.15;protein_coding,WIBG;ENSG00000170473.12;protein_coding	hypo	mutCLL_MBC,unmutCLL_NBCB	0.25577	0.97644	0.52424	0.96844
chr12	56841909	56841992	promoter	chr12:56810902-56843187	TIMELESS;ENSG00000111602.7;protein_coding	hypo	unmutCLL_NBCB	0.64709	0.98392	0.811892	0.956048
chr12	57024956	57025061	genebody	chr12:56989379-57030600	BAZ2A;ENSG00000076108.7;protein_coding	hypo	unmutCLL_NBCB	0.71161	0.99728	0.862609	0.9794
chr12	57493623	57493654	genebody	chr12:57489190-57525922	STAT6;ENSG00000166888.6;protein_coding	hypo	unmutCLL_NBCB	0.6225	0.99211	0.75775	0.930833
chr12	57629238	57629275	genebody	chr12:57628685-57634498	NDUFA4L2;ENSG00000185633.6;protein_coding	hypo	unmutCLL_NBCB	0.74103	0.99956	0.77355	0.984333
chr12	57639312	57639447	genebody,promoter	chr12:57628685-57634498,chr12:57637235-57644976	NDUFA4L2;ENSG00000185633.6;protein_coding,STAC3;ENSG00000185482.3;protein_coding	hypo	unmutCLL_NBCB	0.70872	0.98081	0.847136	0.943667
chr12	58137167	58137360	genebody,promoter	chr12:58118979-58135940,chr12:58131795-58143994	AGAP2;ENSG00000135439.7;protein_coding,TSPAN31;ENSG00000135452.5;protein_coding	hypo	unmutCLL_NBCB	0.7306	0.9935	0.8263	0.980095
chr12	58226429	58226498	genebody,promoter	chr12:58213709-58240522,chr12:58230874-58236528	CTDSP2;ENSG00000175215.5;protein_coding,RP11-620J15.1;ENSG00000257953.1;antisense	hypo	mutCLL_MBC	0.415111	0.971333	0.55978	0.86656
chr12	58294940	58294953	promoter	chr12:58263617-58290265	RP11-620J15.2;ENSG00000245651.2;lincRNA	hypo	unmutCLL_NBCB	0.68614	0.98822	0.88165	0.985333
chr12	62680442	62680631	genebody	chr12:62654118-62811211	USP15;ENSG00000135655.9;protein_coding	hypo	unmutCLL_NBCB	0.46705	0.98944	0.648775	0.951889
chr12	62680514	62680585	genebody	chr12:62654118-62811211	USP15;ENSG00000135655.9;protein_coding	hypo	mutCLL_MBC	0.206617	0.998667	0.44778	0.91278
chr12	65012384	65012401	genebody,promoter	chr12:65004292-65091347,chr12:65016288-65016385	MIR548C;ENSG00000207546.1;miRNA,RASSF3;ENSG00000153179.7;protein_coding	hypo	mutCLL_MBC	0.46165	0.994333	0.5094	0.93689
chr12	66092515	66092644	intergenic	NA:NA-NA	NA	hypo	unmutCLL_NBCB	0.69446	0.97456	0.540528	0.912167
chr12	661937	662049	genebody	chr12:569529-672675	B4GALNT3;ENSG00000139044.6;protein_coding	hypo	unmutCLL_NBCB	0.67037	0.97022	0.833955	0.939
chr12	6725649	6725694	intergenic	NA:NA-NA	NA	hypo	mutCLL_MBC	0.5872	0.936833	0.67903	0.94744
chr12	6725649	6725785	intergenic	NA:NA-NA	NA	hypo	unmutCLL_NBCB	0.50828	0.94775	0.67903	0.947444
chr12	681383	681427	genebody	chr12:673461-772945	NINJ2;ENSG00000171840.7;protein_coding	hypo	mutCLL_MBC	0.7134	1	0.61087	0.86722
chr12	68592056	68592258	genebody	chr12:68383224-68628466	IFNG-AS1;ENSG00000255733.1;antisense	hypo	unmutCLL_NBCB	0.60543	0.999	0.894049	0.995963
chr12	687184	687297	genebody	chr12:673461-772945	NINJ2;ENSG00000171840.7;protein_coding	hypo	unmutCLL_NBCB	0.6345	0.9936	0.821955	0.989667
chr12	6882466	6882567	promoter	chr12:6881677-6887621	LAG3;ENSG00000089692.4;protein_coding	hypo	mutCLL_MBC,unmutCLL_NBCB	0.25517	0.85289	0.4697	0.91878
chr12	6883793	6883834	promoter	chr12:6881677-6887621	LAG3;ENSG00000089692.4;protein_coding	hypo	unmutCLL_NBCB	0.3121	0.99256	0.716857	0.963667
chr12	6890883	6890948	promoter	chr12:6893019-6893327	RN7SL380P;ENSG00000244532.1;misc_RNA	hypo	unmutCLL_NBCB	0.47139	0.99567	0.979125	0.959167
chr12	69280278	69280303	genebody	chr12:69235976-69365350	CPM;ENSG00000135678.7;protein_coding	hypo	mutCLL_MBC,unmutCLL_NBCB	0.6782	1	0.66688	0.97189
chr12	7027972	7028013	genebody	chr12:7022908-7032861	ENO2;ENSG00000111674.4;protein_coding	hypo	unmutCLL_NBCB	0.70593	0.99344	0.840864	0.93
chr12	70492108	70492129	genebody	chr12:70297812-70637140	RP11-611E13.2;ENSG00000257815.1;antisense	hypo	unmutCLL_NBCB	0.74316	0.99667	0.589125	0.988667
chr12	70949818	70949897	genebody	chr12:70910629-71031220	PTPRB;ENSG00000127329.10;protein_coding	hypo	unmutCLL_NBCB	0.59864	0.99256	0.751864	0.914167
chr12	7611335	7611361	genebody	chr12:7499280-7632493	CD163L1;ENSG00000177675.4;protein_coding	hypo	unmutCLL_NBCB	0.72213	0.98844	0.756424	0.953833
chr12	7850498	7850515	promoter	chr12:7842377-7848372	GDF3;ENSG00000184344.3;protein_coding	hypo	unmutCLL_NBCB	0.71527	0.97922	0.733697	0.9745
chr12	78608278	78608328	intergenic	NA:NA-NA	NA	hypo	mutCLL_MBC	0.79645	0.996833	0.70373	0.97178
chr12	78854321	78854478	genebody	chr12:78746298-78876799,chr12:78842774-78934455	RP11-171L9.1;ENSG00000257165.1;lincRNA,RP11-754N21.1;ENSG00000258084.1;lincRNA	hypo	unmutCLL_NBCB	0.6304	0.98656	0.550817	0.963333
chr12	7910503	7910530	intergenic	NA:NA-NA	NA	hypo	mutCLL_MBC	0.08705	0.994667	0.58625	0.984
chr12	79459019	79459087	genebody	chr12:79257772-79845788	SYT1;ENSG00000067715.9;protein_coding	hypo	unmutCLL_NBCB	0.64414	0.96167	0.726045	0.949
chr12	809459	809572	intergenic	NA:NA-NA	NA	hypo	unmutCLL_NBCB	0.6718	0.98533	0.675136	0.958
chr12	85518720	85518737	genebody	chr12:85430091-85657002	LRRIQ1;ENSG00000133640.14;protein_coding	hypo	unmutCLL_NBCB	0.70695	0.96644	0.7779	0.898
chr12	86690405	86690420	genebody	chr12:86372515-87232681	MGAT4C;ENSG00000182050.9;protein_coding	hypo	unmutCLL_NBCB	0.63112	0.99422	0.768636	0.9235
chr12	86818790	86818827	genebody	chr12:86372515-87232681	MGAT4C;ENSG00000182050.9;protein_coding	hypo	unmutCLL_NBCB	0.6419	0.98133	0.891	0.997167
chr12	86911625	86911659	genebody	chr12:86372515-87232681	MGAT4C;ENSG00000182050.9;protein_coding	hypo	mutCLL_MBC	0.792111	0.986167	0.59008	0.86889
chr12	87551839	87551878	intergenic	NA:NA-NA	NA	hypo	unmutCLL_NBCB	0.63431	0.96478	0.912813	1
chr12	8808815	8808864	genebody	chr12:8789941-8815484	MFAP5;ENSG00000197614.6;protein_coding	hypo	mutCLL_MBC	0.6754	1	0.73111	0.98417
chr12	90449405	90449476	intergenic	NA:NA-NA	NA	hypo	unmutCLL_NBCB	0.63283	0.99367	0.840318	0.996333
chr12	93065830	93065837	intergenic	NA:NA-NA	NA	hypo	mutCLL_MBC	0.477714	0.997333	0.61768	1
chr12	9399509	9399563	genebody,promoter	chr12:9381128-9420709,chr12:9399092-9410556	A2MP1;ENSG00000256069.3;pseudogene,RP11-118B22.4;ENSG00000256427.1;lincRNA	hypo	unmutCLL_NBCB	0.73335	0.998	0.716121	0.963778
chr12	9399518	9399563	genebody,promoter	chr12:9381128-9420709,chr12:9399092-9410556	A2MP1;ENSG00000256069.3;pseudogene,RP11-118B22.4;ENSG00000256427.1;lincRNA	hypo	mutCLL_MBC	0.64275	1	0.68658	0.96711
chr12	95216755	95216773	intergenic	NA:NA-NA	NA	hypo	unmutCLL_NBCB	0.47414	0.99722	0.75585	0.9685
chr12	9531532	9531609	genebody	chr12:9520059-9550213	RP13-735L24.1;ENSG00000260423.1;lincRNA	hypo	unmutCLL_NBCB	0.74276	0.99356	0.844125	0.95
chr12	95411702	95411747	intergenic	NA:NA-NA	NA	hypo	mutCLL_MBC,unmutCLL_NBCB	0.29063	0.99056	0.65637	0.99133
chr12	95412778	95412912	intergenic	NA:NA-NA	NA	hypo	unmutCLL_NBCB	0.64054	0.99572	0.727523	0.9726
chr12	97075563	97075671	genebody	chr12:96883348-97269333	C12orf55;ENSG00000188596.5;protein_coding	hypo	unmutCLL_NBCB	0.73857	0.98978	0.826045	0.886
chr12	98932702	98932870	genebody	chr12:98909289-98944157	TMPO;ENSG00000120802.9;protein_coding	hypo	mutCLL_MBC,unmutCLL_NBCB	0.70009	0.99856	0.73323	0.98841
chr13	100633673	100633776	promoter	chr13:100634025-100639018	ZIC2;ENSG00000043355.6;protein_coding	hyper	unmutCLL_NBCB	0.26334	0.0059792	0.192658	0.0450667
chr13	100762105	100762188	genebody	chr13:100741268-101182686	PCCA;ENSG00000175198.10;protein_coding	hypo	mutCLL_MBC,unmutCLL_NBCB	0.6847	0.99393	0.57902	0.91327
chr13	102305211	102305236	genebody	chr13:102104965-102375456	ITGBL1;ENSG00000198542.9;protein_coding	hypo	unmutCLL_NBCB	0.61283	0.96211	0.8472	0.910833
chr13	103789219	103789326	intergenic	NA:NA-NA	NA	hypo	mutCLL_MBC,unmutCLL_NBCB	0.2453	0.97922	0.56859	0.93822
chr13	106617050	106617187	intergenic	NA:NA-NA	NA	hypo	unmutCLL_NBCB	0.7444	0.99744	0.853318	0.854
chr13	108755271	108755310	intergenic	NA:NA-NA	NA	hypo	unmutCLL_NBCB	0.67153	0.99078	0.726364	0.939333
chr13	110532464	110532531	intergenic	NA:NA-NA	NA	hypo	mutCLL_MBC	0.877611	0.974333	0.70058	0.96944
chr13	111290450	111290508	genebody	chr13:111267880-111292340	CARKD;ENSG00000213995.7;protein_coding	hypo	mutCLL_MBC	0.717833	0.9925	0.61267	0.89756
chr13	111306271	111306328	genebody	chr13:111293758-111365950	CARS2;ENSG00000134905.12;protein_coding	hypo	unmutCLL_NBCB	0.31527	0.98487	0.522	0.98525
chr13	111317824	111317845	genebody	chr13:111293758-111365950	CARS2;ENSG00000134905.12;protein_coding	hypo	unmutCLL_NBCB	0.22581	0.972	0.488071	0.9775
chr13	112791565	112791664	intergenic	NA:NA-NA	NA	hypo	unmutCLL_NBCB	0.69411	0.961	0.821591	0.921333
chr13	113366903	113367021	genebody	chr13:113344642-113541482	ATP11A;ENSG00000068650.14;protein_coding	hypo	unmutCLL_NBCB	0.72683	1	0.891764	0.986278
chr13	113513877	113513920	genebody	chr13:113344642-113541482	ATP11A;ENSG00000068650.14;protein_coding	hypo	unmutCLL_NBCB	0.71543	1	0.889563	0.9665
chr13	113775038	113775123	promoter	chr13:113777127-113803843	F10;ENSG00000126218.7;protein_coding	hypo	unmutCLL_NBCB	0.70643	0.98833	0.725591	0.805333
chr13	114008966	114008999	genebody	chr13:113978504-114018446,chr13:114005987-114016183	GRTP1-AS1;ENSG00000225083.1;antisense,GRTP1;ENSG00000139835.9;protein_coding	hypo	unmutCLL_NBCB	0.64665	0.99367	0.537917	0.959333
chr13	114150221	114150279	genebody,promoter	chr13:114110133-114145267,chr13:114145309-114204542	DCUN1D2;ENSG00000150401.10;protein_coding,TMCO3;ENSG00000150403.13;protein_coding	hypo	unmutCLL_NBCB	0.65708	0.99622	0.888437	0.995833
chr13	114800244	114800308	genebody	chr13:114747193-114898086	RASA3;ENSG00000185989.9;protein_coding	hypo	unmutCLL_NBCB	0.6375	0.99892	0.850939	0.994667
chr13	114867001	114867228	genebody	chr13:114747193-114898086	RASA3;ENSG00000185989.9;protein_coding	hypo	unmutCLL_NBCB	0.56691	0.98515	0.801101	0.961606
chr13	114869872	114870043	genebody	chr13:114747193-114898086	RASA3;ENSG00000185989.9;protein_coding	hypo	mutCLL_MBC,unmutCLL_NBCB	0.090606	0.99408	0.36161	0.98104
chr13	114917241	114917271	intergenic	NA:NA-NA	NA	hypo	mutCLL_MBC	0.38425	0.975	0.39364	0.87578
chr13	19524060	19524097	genebody	chr13:19521041-19526727	PHF2P2;ENSG00000226057.2;pseudogene	hypo	unmutCLL_NBCB	0.62949	0.93711	0.82	0.9475
chr13	20692101	20692114	intergenic	NA:NA-NA	NA	hypo	unmutCLL_NBCB	0.70174	0.99256	0.8698	0.934333
chr13	20735537	20735587	promoter	chr13:20712393-20735188	GJA3;ENSG00000121743.3;protein_coding	hyper	mutCLL_MBC	0.0966875	0.0422917	0.34588	0.043889
chr13	20936061	20936143	intergenic	NA:NA-NA	NA	hypo	unmutCLL_NBCB	0.741	0.998	0.780818	0.904333
chr13	24897833	24897892	promoter	chr13:24889862-24895736,chr13:24895263-24895566	AL359736.1;ENSG00000205850.6;protein_coding,C1QTNF9-AS1;ENSG00000240868.1;antisense	hypo	unmutCLL_NBCB	0.67497	0.98189	0.75725	0.9615
chr13	26425446	26425489	genebody	chr13:25946208-26599989	ATP8A2;ENSG00000132932.12;protein_coding	hypo	unmutCLL_NBCB	0.66573	0.96356	0.72205	0.887
chr13	26907435	26907502	genebody	chr13:26828275-26979375	CDK8;ENSG00000132964.7;protein_coding	hypo	mutCLL_MBC,unmutCLL_NBCB	0.44977	0.98956	0.57561	0.89444
chr13	28701768	28701900	intergenic	NA:NA-NA	NA	hypo	mutCLL_MBC,unmutCLL_NBCB	0.55658	0.99744	0.64906	0.96911
chr13	32296780	32296865	intergenic	NA:NA-NA	NA	hypo	unmutCLL_NBCB	0.68816	0.99267	0.779955	0.887667
chr13	32704298	32704337	genebody	chr13:32605436-32870794	FRY;ENSG00000073910.15;protein_coding	hypo	mutCLL_MBC,unmutCLL_NBCB	0.2117	0.99825	0.68577	0.995
chr13	32999987	33000032	genebody,promoter	chr13:32974860-33002315,chr13:32999494-33007091	N4BP2L1;ENSG00000139597.12;protein_coding,RP11-298P3.4;ENSG00000270008.1;processed_transcript	hypo	mutCLL_MBC,unmutCLL_NBCB	0.5614	0.99678	0.62375	0.94344
chr13	35093519	35093580	genebody	chr13:34922179-35188307,chr13:35009586-35214822	LINC00457;ENSG00000225179.1;lincRNA,RP11-16D22.2;ENSG00000271850.1;lincRNA	hypo	unmutCLL_NBCB	0.73807	0.991	0.771091	0.9415
chr13	35620011	35620155	genebody	chr13:35516423-36247159	NBEA;ENSG00000172915.14;protein_coding	hypo	unmutCLL_NBCB	0.5048	0.98689	0.685	0.925333
chr13	40957118	40957151	intergenic	NA:NA-NA	NA	hypo	unmutCLL_NBCB	0.71587	0.99911	0.95205	0.979833
chr13	41109488	41109622	promoter	chr13:41111137-41111323	AL133318.1;ENSG00000269120.1;protein_coding	hypo	unmutCLL_NBCB	0.54791	0.99719	0.847607	0.994722
chr13	41109492	41109540	promoter	chr13:41111137-41111323	AL133318.1;ENSG00000269120.1;protein_coding	hypo	mutCLL_MBC	0.416444	0.991222	0.6382	0.99378
chr13	41193143	41193203	genebody	chr13:41129803-41240734	FOXO1;ENSG00000150907.6;protein_coding	hypo	mutCLL_MBC	0.45915	0.997833	0.60164	0.97589
chr13	41193143	41193279	genebody	chr13:41129803-41240734	FOXO1;ENSG00000150907.6;protein_coding	hypo	unmutCLL_NBCB	0.52324	0.99892	0.601636	0.975889
chr13	44947837	44947846	promoter	chr13:44947800-44971850	SERP2;ENSG00000151778.6;protein_coding	hyper	mutCLL_MBC	0.40565	0.0591667	0.42809	0.15778
chr13	45270702	45270768	genebody	chr13:45225947-45275152	LINC00407;ENSG00000237585.1;lincRNA	hypo	unmutCLL_NBCB	0.69608	0.98011	0.70825	0.892167
chr13	46016447	46016584	intergenic	NA:NA-NA	NA	hypo	unmutCLL_NBCB	0.72882	0.99993	0.801356	0.9675
chr13	47040336	47040492	genebody	chr13:47029269-47060641	RP11-189B4.6;ENSG00000231817.3;lincRNA	hypo	unmutCLL_NBCB	0.69456	0.99767	0.807896	0.943667
chr13	49794531	49794547	promoter	chr13:49794473-49796513	MLNR;ENSG00000102539.4;protein_coding	hyper	unmutCLL_NBCB	0.27093	0.0069167	0.183424	0.0577778
chr13	51888458	51888534	intergenic	NA:NA-NA	NA	hypo	unmutCLL_NBCB	0.74124	0.99467	0.927722	0.962333
chr13	54571594	54571651	intergenic	NA:NA-NA	NA	hypo	unmutCLL_NBCB	0.656	0.95522	0.89485	0.9625
chr13	54703709	54703771	genebody	chr13:54689923-54707001	LINC00458;ENSG00000234787.3;lincRNA	hypo	unmutCLL_NBCB	0.68719	0.95133	0.72295	0.862833
chr13	56552129	56552146	intergenic	NA:NA-NA	NA	hypo	unmutCLL_NBCB	0.62716	0.96778	0.854563	0.968333
chr13	64079620	64079677	intergenic	NA:NA-NA	NA	hypo	unmutCLL_NBCB	0.72607	0.99789	0.688568	0.8885
chr13	64388383	64388438	intergenic	NA:NA-NA	NA	hypo	unmutCLL_NBCB	0.72431	0.97756	0.83725	0.9235
chr13	67746773	67746806	genebody	chr13:66876966-67804468	PCDH9;ENSG00000184226.10;protein_coding	hypo	unmutCLL_NBCB	0.22884	0.88044	0.548591	0.813
chr13	71285331	71285344	intergenic	NA:NA-NA	NA	hypo	unmutCLL_NBCB	0.61827	0.98889	0.696222	1
chr13	71285331	71285381	intergenic	NA:NA-NA	NA	hypo	mutCLL_MBC	0.6203	0.991667	0.62957	0.98558
chr13	73920116	73920242	intergenic	NA:NA-NA	NA	hypo	unmutCLL_NBCB	0.6153	0.97733	0.748561	0.890167
chr13	73940812	73940856	intergenic	NA:NA-NA	NA	hypo	unmutCLL_NBCB	0.72639	0.97933	0.59865	0.848
chr13	75489762	75489830	intergenic	NA:NA-NA	NA	hypo	unmutCLL_NBCB	0.68756	0.97778	0.942182	0.9935
chr13	75913941	75914002	genebody	chr13:75858807-76056250	TBC1D4;ENSG00000136111.8;protein_coding	hypo	unmutCLL_NBCB	0.68165	0.99767	0.782773	0.9605
chr13	76997400	76997523	intergenic	NA:NA-NA	NA	hypo	unmutCLL_NBCB	0.69598	0.99544	0.778383	0.887833
chr13	79207926	79208057	genebody	chr13:79188425-79233314	RNF219;ENSG00000152193.7;protein_coding	hypo	mutCLL_MBC	0.776425	1	0.7188	0.99652
chr13	82558439	82558537	intergenic	NA:NA-NA	NA	hypo	unmutCLL_NBCB	0.71569	0.99627	0.768841	0.954417
chr13	83451002	83451089	intergenic	NA:NA-NA	NA	hypo	unmutCLL_NBCB	0.72698	0.99	0.530909	0.889833
chr13	87689245	87689279	intergenic	NA:NA-NA	NA	hypo	unmutCLL_NBCB	0.69057	0.98978	0.780864	0.956667
chr13	89562825	89562856	intergenic	NA:NA-NA	NA	hypo	unmutCLL_NBCB	0.69337	0.99744	0.756636	0.946833
chr13	89593262	89593393	intergenic	NA:NA-NA	NA	hypo	unmutCLL_NBCB	0.73777	0.9984	0.84975	0.957667
chr13	91291058	91291103	intergenic	NA:NA-NA	NA	hypo	unmutCLL_NBCB	0.73135	0.98622	0.93375	0.980667
chr13	98870250	98870317	genebody	chr13:98794815-99102027	FARP1;ENSG00000152767.11;protein_coding	hypo	unmutCLL_NBCB	0.35251	0.9974	0.841629	0.976
chr14	100148715	100148761	promoter	chr14:100150640-100193638	CYP46A1;ENSG00000036530.4;protein_coding	hypo	mutCLL_MBC	0.706967	0.956	0.58036	0.93256
chr14	100148715	100148765	promoter	chr14:100150640-100193638	CYP46A1;ENSG00000036530.4;protein_coding	hypo	unmutCLL_NBCB	0.67158	0.96042	0.662545	0.932556
chr14	100211643	100211695	genebody	chr14:100204029-100408397	EML1;ENSG00000066629.12;protein_coding	hypo	unmutCLL_NBCB	0.69735	0.98344	0.65665	0.873167
chr14	100297637	100297708	genebody	chr14:100204029-100408397	EML1;ENSG00000066629.12;protein_coding	hypo	unmutCLL_NBCB	0.71145	0.96244	0.859818	0.9695
chr14	100622244	100622285	genebody	chr14:100612755-100626500	DEGS2;ENSG00000168350.6;protein_coding	hypo	unmutCLL_NBCB	0.56591	0.97244	0.7944	0.9355
chr14	100791677	100791791	promoter	chr14:100789164-100789270,chr14:100789673-100796715	AL157871.1;ENSG00000263519.1;miRNA,SLC25A47;ENSG00000140107.10;protein_coding	hypo	unmutCLL_NBCB	0.53279	0.92822	0.842875	0.929556
chr14	100859822	100859893	genebody	chr14:100842754-100996640	WDR25;ENSG00000176473.9;protein_coding	hypo	unmutCLL_NBCB	0.65933	0.994	0.729697	0.890833
chr14	101160803	101160929	intergenic	NA:NA-NA	NA	hypo	unmutCLL_NBCB	0.72813	0.98344	0.898818	0.948667
chr14	101642975	101643046	intergenic	NA:NA-NA	NA	hypo	unmutCLL_NBCB	0.70528	0.98178	0.853636	0.845333
chr14	102282204	102282301	genebody	chr14:102228134-102394326	PPP2R5C;ENSG00000078304.15;protein_coding	hypo	unmutCLL_NBCB	0.64309	0.9986	0.833818	0.97175
chr14	102308570	102308653	genebody,promoter	chr14:102228134-102394326,chr14:102299771-102305868	CTD-2017C7.1;ENSG00000256705.3;antisense,PPP2R5C;ENSG00000078304.15;protein_coding	hypo	mutCLL_MBC	0.527875	0.999917	0.66666	0.96207
chr14	102364940	102365029	genebody	chr14:102228134-102394326	PPP2R5C;ENSG00000078304.15;protein_coding	hypo	unmutCLL_NBCB	0.70305	0.99933	0.931	0.997889
chr14	102653008	102653114	genebody	chr14:102605839-102691184	WDR20;ENSG00000140153.13;protein_coding	hypo	unmutCLL_NBCB	0.64713	0.99917	0.890436	0.9994
chr14	102776160	102776294	promoter	chr14:102690836-102771537	MOK;ENSG00000080823.17;protein_coding	hypo	mutCLL_MBC	0.740067	0.992444	0.68886	0.94189
chr14	103136396	103136475	genebody	chr14:103058997-103196913	RCOR1;ENSG00000089902.8;protein_coding	hypo	unmutCLL_NBCB	0.56336	0.97678	0.69235	0.892167
chr14	103369590	103369756	genebody	chr14:103243812-103377837	TRAF3;ENSG00000131323.10;protein_coding	hypo	unmutCLL_NBCB	0.65882	0.99613	0.946161	0.994133
chr14	103376850	103376913	genebody	chr14:103243812-103377837	TRAF3;ENSG00000131323.10;protein_coding	hypo	unmutCLL_NBCB	0.59188	0.98947	0.737705	0.948167
chr14	103467941	103468033	genebody	chr14:103398715-103523799	CDC42BPB;ENSG00000198752.5;protein_coding	hypo	unmutCLL_NBCB	0.36965	0.9978	0.604175	0.9715
chr14	104160042	104160119	genebody,promoter	chr14:104028232-104167888,chr14:104160852-104161387,chr14:104160896-104161507,chr14:104162689-104163500	KLC1;ENSG00000126214.16;protein_coding,RP11-73M18.10;ENSG00000269910.1;antisense,RP11-73M18.7;ENSG00000269940.1;sense_intronic,RP11-73M18.8;ENSG00000269958.1;sense_intronic	hypo	unmutCLL_NBCB	0.73414	0.98878	0.836182	0.961667
chr14	104222569	104222717	genebody	chr14:104200088-104313927	PPP1R13B;ENSG00000088808.12;protein_coding	hypo	mutCLL_MBC,unmutCLL_NBCB	0.4821	0.99456	0.5949	0.95733
chr14	104374049	104374094	intergenic	NA:NA-NA	NA	hypo	mutCLL_MBC,unmutCLL_NBCB	0.53365	0.99956	0.60784	0.98911
chr14	104641759	104641822	genebody	chr14:104605059-104647231	KIF26A;ENSG00000066735.10;protein_coding	hypo	unmutCLL_NBCB	0.65041	0.96811	0.810983	0.888167
chr14	104761974	104762035	intergenic	NA:NA-NA	NA	hypo	unmutCLL_NBCB	0.59181	0.95733	0.650848	0.848667
chr14	104771907	104771940	intergenic	NA:NA-NA	NA	hypo	unmutCLL_NBCB	0.65207	0.95611	0.864818	0.9315
chr14	104859202	104859262	intergenic	NA:NA-NA	NA	hypo	unmutCLL_NBCB	0.58386	0.98389	0.69655	0.945556
chr14	104887503	104887670	intergenic	NA:NA-NA	NA	hypo	unmutCLL_NBCB	0.68488	0.99	0.725333	0.933889
chr14	104887544	104887670	intergenic	NA:NA-NA	NA	hypo	mutCLL_MBC	0.5946	0.997833	0.66264	0.91433
chr14	105155286	105155337	promoter	chr14:105155942-105185942,chr14:105156427-105157621	INF2;ENSG00000203485.8;protein_coding,RP11-982M15.5;ENSG00000258858.1;antisense	hypo	unmutCLL_NBCB	0.6537	0.94911	0.848364	0.972333
chr14	105174737	105174790	genebody	chr14:105155942-105185942	INF2;ENSG00000203485.8;protein_coding	hypo	mutCLL_MBC	0.542467	0.997111	0.5987	0.91367
chr14	105178003	105178199	genebody	chr14:105155942-105185942	INF2;ENSG00000203485.8;protein_coding	hypo	mutCLL_MBC,unmutCLL_NBCB	0.54568	0.99167	0.67377	0.95225
chr14	105252336	105252356	genebody	chr14:105235685-105262088	AKT1;ENSG00000142208.11;protein_coding	hypo	unmutCLL_NBCB	0.65543	0.90856	0.723773	0.893833
chr14	105812612	105812712	genebody	chr14:105766899-105864484	PACS2;ENSG00000179364.9;protein_coding	hypo	unmutCLL_NBCB	0.57692	0.99975	0.860515	0.974667
chr14	105814058	105814173	genebody	chr14:105766899-105864484	PACS2;ENSG00000179364.9;protein_coding	hypo	mutCLL_MBC,unmutCLL_NBCB	0.15212	0.99058	0.48176	0.97367
chr14	105814742	105814801	genebody	chr14:105766899-105864484	PACS2;ENSG00000179364.9;protein_coding	hypo	unmutCLL_NBCB	0.60313	0.98011	0.843073	0.902833
chr14	105848280	105848353	genebody	chr14:105766899-105864484	PACS2;ENSG00000179364.9;protein_coding	hypo	unmutCLL_NBCB	0.70774	0.98278	0.8217	0.951267
chr14	105855936	105856093	genebody	chr14:105766899-105864484	PACS2;ENSG00000179364.9;protein_coding	hypo	mutCLL_MBC	0.173398	0.96275	0.4271	0.8664
chr14	105855963	105856093	genebody	chr14:105766899-105864484	PACS2;ENSG00000179364.9;protein_coding	hypo	unmutCLL_NBCB	0.31108	0.93642	0.436967	0.886667
chr14	105920383	105920658	genebody	chr14:105886158-105937066	MTA1;ENSG00000182979.13;protein_coding	hypo	mutCLL_MBC,unmutCLL_NBCB	0.17389	0.99707	0.59343	0.9608
chr14	20269108	20269173	genebody	chr14:20187173-20296531	OR4N2;ENSG00000176294.3;protein_coding	hypo	unmutCLL_NBCB	0.65282	0.94389	0.647591	0.872
chr14	21191292	21191347	intergenic	NA:NA-NA	NA	hypo	unmutCLL_NBCB	0.59561	0.85989	0.932864	0.908333
chr14	21925885	21925919	promoter	chr14:21853352-21924285	CHD8;ENSG00000100888.8;protein_coding	hypo	mutCLL_MBC	0.71985	0.994333	0.72226	0.97367
chr14	23271327	23271471	genebody	chr14:23242430-23299029	SLC7A7;ENSG00000155465.14;protein_coding	hypo	mutCLL_MBC	0.413844	0.993167	0.52936	0.96507
chr14	23271327	23271535	genebody	chr14:23242430-23299029	SLC7A7;ENSG00000155465.14;protein_coding	hypo	unmutCLL_NBCB	0.38757	0.99506	0.569288	0.965067
chr14	23315038	23315088	genebody	chr14:23305765-23318236	MMP14;ENSG00000157227.8;protein_coding	hypo	unmutCLL_NBCB	0.74904	0.99933	0.848187	0.948
chr14	23926617	23926672	intergenic	NA:NA-NA	NA	hypo	unmutCLL_NBCB	0.70183	1	0.91575	0.943333
chr14	26149268	26149359	intergenic	NA:NA-NA	NA	hypo	unmutCLL_NBCB	0.6271	0.99422	0.76	0.909167
chr14	27225638	27225715	genebody	chr14:27067617-27275673	NOVA1-AS1;ENSG00000257842.1;antisense	hypo	unmutCLL_NBCB	0.70367	0.98733	0.811591	0.936778
chr14	31371093	31371100	genebody	chr14:31363004-31495607	STRN3;ENSG00000196792.7;protein_coding	hypo	unmutCLL_NBCB	0.58535	1	0.979125	1
chr14	31828652	31828788	genebody	chr14:31760993-31889788,chr14:31803517-31926647	HEATR5A;ENSG00000129493.10;protein_coding,RP11-176H8.1;ENSG00000203546.3;protein_coding	hypo	mutCLL_MBC,unmutCLL_NBCB	0.72026	0.99778	0.66463	0.93678
chr14	32655025	32655121	intergenic	NA:NA-NA	NA	hypo	unmutCLL_NBCB	0.7377	0.99478	0.628727	0.877667
chr14	34113878	34114154	genebody	chr14:33404138-34273382	NPAS3;ENSG00000151322.14;protein_coding	hypo	unmutCLL_NBCB	0.72657	0.98989	0.74982	0.872444
chr14	34442550	34442591	genebody	chr14:34393436-34931980	EGLN3;ENSG00000129521.9;protein_coding	hypo	unmutCLL_NBCB	0.42729	1	0.69637	0.958917
chr14	35227193	35227243	genebody	chr14:35221936-35344853	BAZ1A;ENSG00000198604.6;protein_coding	hypo	mutCLL_MBC	0.653767	0.981778	0.69466	0.99567
chr14	35227197	35227243	genebody	chr14:35221936-35344853	BAZ1A;ENSG00000198604.6;protein_coding	hypo	unmutCLL_NBCB	0.65593	0.98611	0.693909	0.994833
chr14	35270880	35270974	genebody,promoter	chr14:35221936-35344853,chr14:35270736-35270791	AL355885.1;ENSG00000263691.1;miRNA,BAZ1A;ENSG00000198604.6;protein_coding	hypo	mutCLL_MBC,unmutCLL_NBCB	0.50597	0.98856	0.59091	0.97867
chr14	35353901	35353962	intergenic	NA:NA-NA	NA	hypo	unmutCLL_NBCB	0.70485	0.99808	0.8026	0.954111
chr14	35805791	35805828	intergenic	NA:NA-NA	NA	hypo	unmutCLL_NBCB	0.66632	0.97744	0.923278	0.980833
chr14	36483668	36483770	genebody	chr14:36367187-36532949	RP11-116N8.1;ENSG00000258342.1;sense_overlapping	hypo	unmutCLL_NBCB	0.61371	0.92033	0.877121	0.935444
chr14	39911467	39911714	intergenic	NA:NA-NA	NA	hypo	mutCLL_MBC,unmutCLL_NBCB	0.06434	0.9987	0.39596	0.98956
chr14	44126192	44126277	intergenic	NA:NA-NA	NA	hypo	unmutCLL_NBCB	0.71904	0.99542	0.888667	0.938889
chr14	45003360	45003427	genebody	chr14:44976609-45007716	RP11-163M18.1;ENSG00000258747.1;antisense	hypo	unmutCLL_NBCB	0.68442	0.98089	0.729364	0.910167
chr14	46326756	46326810	intergenic	NA:NA-NA	NA	hypo	unmutCLL_NBCB	0.66762	0.98789	0.76765	0.9385
chr14	47994742	47994811	genebody	chr14:47308825-48144157,chr14:47311133-48143999	MDGA2;ENSG00000139915.14;protein_coding,MDGA2;ENSG00000272781.1;protein_coding	hypo	unmutCLL_NBCB	0.72388	0.98511	0.664864	0.912333
chr14	49446322	49446339	intergenic	NA:NA-NA	NA	hypo	unmutCLL_NBCB	0.69524	0.978	0.915455	0.963
chr14	51249891	51249926	genebody	chr14:51186480-51297839	NIN;ENSG00000100503.19;protein_coding	hypo	unmutCLL_NBCB	0.54863	0.99867	0.733429	0.997333
chr14	52234866	52234959	genebody	chr14:52231993-52292140	RP11-280K24.4;ENSG00000258535.1;sense_overlapping	hypo	unmutCLL_NBCB	0.74589	0.99689	0.832727	0.966667
chr14	56379022	56379192	promoter	chr14:56382444-56383044	RP11-1012E15.1;ENSG00000259868.1;lincRNA	hypo	unmutCLL_NBCB	0.74192	0.9938	0.802682	0.92
chr14	64580185	64580230	genebody	chr14:64319682-64693165,chr14:64550949-64804830	ESR2;ENSG00000140009.14;protein_coding,SYNE2;ENSG00000054654.11;protein_coding	hypo	unmutCLL_NBCB	0.6852	0.97522	0.664727	0.880333
chr14	65611067	65611135	intergenic	NA:NA-NA	NA	hypo	mutCLL_MBC,unmutCLL_NBCB	0.63873	0.99456	0.64176	0.94767
chr14	65620430	65620443	intergenic	NA:NA-NA	NA	hypo	mutCLL_MBC	0.9038	0.999833	0.66792	0.95444
chr14	65660013	65660068	intergenic	NA:NA-NA	NA	hypo	mutCLL_MBC,unmutCLL_NBCB	0.46628	0.99911	0.60541	0.98778
chr14	68829286	68829347	genebody	chr14:68286495-69196935	RAD51B;ENSG00000182185.14;protein_coding	hypo	mutCLL_MBC,unmutCLL_NBCB	0.17406	0.98767	0.4806	0.94742
chr14	69029721	69029805	genebody	chr14:68286495-69196935	RAD51B;ENSG00000182185.14;protein_coding	hypo	unmutCLL_NBCB	0.62753	0.99344	0.981273	0.9975
chr14	69278671	69278724	intergenic	NA:NA-NA	NA	hypo	unmutCLL_NBCB	0.65247	0.99233	0.817909	0.962167
chr14	70105778	70105845	genebody	chr14:70078312-70181859	KIAA0247;ENSG00000100647.7;protein_coding	hypo	mutCLL_MBC,unmutCLL_NBCB	0.45199	0.99211	0.46769	0.87933
chr14	72082444	72082568	genebody	chr14:71787165-72207946	SIPA1L1;ENSG00000197555.5;protein_coding	hypo	mutCLL_MBC,unmutCLL_NBCB	0.47502	0.99967	0.61757	0.99633
chr14	73763526	73763590	genebody	chr14:73741814-73930348	NUMB;ENSG00000133961.15;protein_coding	hypo	unmutCLL_NBCB	0.74647	0.99867	0.8471	0.935
chr14	74680669	74680867	intergenic	NA:NA-NA	NA	hypo	unmutCLL_NBCB	0.68418	0.97783	0.715886	0.894889
chr14	75079513	75079526	promoter	chr14:74964872-75079306	LTBP2;ENSG00000119681.7;protein_coding	hyper	mutCLL_MBC	0.1659	0.0761111	0.37014	0.059917
chr14	75376301	75376433	genebody	chr14:75370656-75390099	RPS6KL1;ENSG00000198208.7;protein_coding	hypo	unmutCLL_NBCB	0.69071	0.99294	0.791794	0.942467
chr14	77488978	77489083	intergenic	NA:NA-NA	NA	hypo	unmutCLL_NBCB	0.48094	0.99611	0.706	0.967333
chr14	77492846	77492860	promoter	chr14:77490887-77495034	IRF2BPL;ENSG00000119669.3;protein_coding	hypo	unmutCLL_NBCB	0.7216	0.99056	0.851591	0.875667
chr14	80819604	80819650	genebody	chr14:80663872-80854100,chr14:80677761-80921812	DIO2-AS1;ENSG00000258766.1;antisense,DIO2;ENSG00000211448.7;protein_coding	hypo	unmutCLL_NBCB	0.72429	0.99044	0.81925	0.904333
chr14	82141993	82142003	intergenic	NA:NA-NA	NA	hypo	unmutCLL_NBCB	0.60944	0.99433	0.840556	0.9485
chr14	84858171	84858228	intergenic	NA:NA-NA	NA	hypo	unmutCLL_NBCB	0.65852	0.98833	0.744722	0.9145
chr14	87044193	87044283	intergenic	NA:NA-NA	NA	hypo	unmutCLL_NBCB	0.6571	0.98078	0.824864	0.861833
chr14	89795921	89795928	genebody	chr14:89591214-90085493	FOXN3;ENSG00000053254.11;protein_coding	hypo	unmutCLL_NBCB	0.74171	0.99989	0.946045	1
chr14	91590372	91590431	genebody,promoter	chr14:91526676-91691976,chr14:91592768-91592897	C14orf159;ENSG00000133943.16;protein_coding,SNORA11B;ENSG00000221102.1;snoRNA	hypo	unmutCLL_NBCB	0.16194	0.98489	0.212333	0.924667
chr14	91712155	91712199	genebody	chr14:91698875-91720269,chr14:91709102-91717426	CTD-2547L24.3;ENSG00000258875.1;protein_coding,GPR68;ENSG00000119714.6;protein_coding	hypo	unmutCLL_NBCB	0.71043	0.97933	0.887733	0.99
chr14	91755471	91755554	genebody	chr14:91737666-91884188	CCDC88C;ENSG00000015133.14;protein_coding	hypo	unmutCLL_NBCB	0.70335	0.9996	0.777295	0.961333
chr14	91793657	91793727	genebody	chr14:91737666-91884188	CCDC88C;ENSG00000015133.14;protein_coding	hypo	unmutCLL_NBCB	0.5145	0.98811	0.604833	0.990667
chr14	91835720	91835844	genebody	chr14:91737666-91884188	CCDC88C;ENSG00000015133.14;protein_coding	hypo	unmutCLL_NBCB	0.63784	0.999	0.787636	0.981
chr14	91837009	91837059	genebody	chr14:91737666-91884188	CCDC88C;ENSG00000015133.14;protein_coding	hypo	unmutCLL_NBCB	0.39221	0.99689	0.557833	0.954167
chr14	91845321	91845395	genebody	chr14:91737666-91884188	CCDC88C;ENSG00000015133.14;protein_coding	hypo	mutCLL_MBC,unmutCLL_NBCB	0.34213	0.97511	0.36838	0.90178
chr14	91849876	91849934	genebody	chr14:91737666-91884188	CCDC88C;ENSG00000015133.14;protein_coding	hypo	unmutCLL_NBCB	0.71678	0.99078	0.77485	0.975833
chr14	91871806	91871822	genebody	chr14:91737666-91884188	CCDC88C;ENSG00000015133.14;protein_coding	hypo	mutCLL_MBC,unmutCLL_NBCB	0.47526	0.99	0.58715	0.95911
chr14	92853138	92853182	genebody	chr14:92788924-92962596	SLC24A4;ENSG00000140090.13;protein_coding	hypo	mutCLL_MBC,unmutCLL_NBCB	0.13231	0.98789	0.46297	0.91489
chr14	92981508	92981571	promoter	chr14:92980117-93155339	RIN3;ENSG00000100599.11;protein_coding	hypo	unmutCLL_NBCB	0.65242	0.97058	0.871273	0.976889
chr14	92995751	92995880	genebody	chr14:92980117-93155339	RIN3;ENSG00000100599.11;protein_coding	hypo	unmutCLL_NBCB	0.62849	0.9949	0.820927	0.943611
chr14	93016106	93016189	genebody	chr14:92980117-93155339	RIN3;ENSG00000100599.11;protein_coding	hypo	unmutCLL_NBCB	0.26513	0.99622	0.8825	0.996333
chr14	97163732	97163825	intergenic	NA:NA-NA	NA	hypo	unmutCLL_NBCB	0.69384	0.96789	0.933227	0.911667
chr14	97792018	97792138	intergenic	NA:NA-NA	NA	hypo	unmutCLL_NBCB	0.69353	0.99422	0.809364	0.927667
chr14	97954583	97954728	genebody	chr14:97925152-98047938	CTD-2506J14.1;ENSG00000246084.2;lincRNA	hypo	unmutCLL_NBCB	0.71622	0.99633	0.781394	0.889
chr14	98169554	98169626	intergenic	NA:NA-NA	NA	hypo	unmutCLL_NBCB	0.66159	0.98944	0.850227	0.9295
chr14	98791517	98791585	intergenic	NA:NA-NA	NA	hypo	unmutCLL_NBCB	0.71403	0.99167	0.791045	0.941333
chr14	98865530	98865666	intergenic	NA:NA-NA	NA	hypo	unmutCLL_NBCB	0.68665	0.99233	0.715159	0.904
chr14	99969416	99969534	genebody	chr14:99947505-100001381	CCNK;ENSG00000090061.13;protein_coding	hypo	unmutCLL_NBCB	0.72457	0.999	0.964948	0.993222
chr15	100344562	100344678	promoter	chr15:100330360-100347132,chr15:100347227-100417353	CTD-2054N24.2;ENSG00000259363.1;protein_coding,DNM1P46;ENSG00000182397.10;pseudogene	hypo	unmutCLL_NBCB	0.54931	0.99792	0.7525	0.969778
chr15	100700895	100700985	genebody	chr15:100511793-100882210	ADAMTS17;ENSG00000140470.9;protein_coding	hypo	unmutCLL_NBCB	0.56717	0.98133	0.704364	0.8305
chr15	101174796	101174878	genebody,promoter	chr15:101142738-101191910,chr15:101178567-101178662	ASB7;ENSG00000183475.8;protein_coding,Y_RNA;ENSG00000212306.1;misc_RNA	hypo	unmutCLL_NBCB	0.60548	0.98589	0.58153	0.976833
chr15	101661483	101661495	intergenic	NA:NA-NA	NA	hypo	mutCLL_MBC	0.9431	0.949333	0.7009	0.95333
chr15	20142034	20142071	intergenic	NA:NA-NA	NA	hypo	unmutCLL_NBCB	0.58027	0.93133	0.758955	0.9565
chr15	26015290	26015300	genebody	chr15:25922419-26110317	ATP10A;ENSG00000206190.7;protein_coding	hypo	mutCLL_MBC	0.8536	0.992333	0.66853	0.93244
chr15	26106858	26106920	genebody,promoter	chr15:25922419-26110317,chr15:26110441-26122358	ATP10A;ENSG00000206190.7;protein_coding,RP11-2C7.1;ENSG00000259011.1;lincRNA	hypo	unmutCLL_NBCB	0.60603	0.91656	0.882591	0.9555
chr15	26111317	26111357	promoter	chr15:25922419-26110317,chr15:26110441-26122358	ATP10A;ENSG00000206190.7;protein_coding,RP11-2C7.1;ENSG00000259011.1;lincRNA	hypo	unmutCLL_NBCB	0.74313	0.99911	0.781182	0.857167
chr15	26328864	26328947	intergenic	NA:NA-NA	NA	hypo	unmutCLL_NBCB	0.61597	1	0.816955	0.923667
chr15	34609624	34609759	genebody	chr15:34525459-34630261	SLC12A6;ENSG00000140199.7;protein_coding	hypo	unmutCLL_NBCB	0.60384	0.97267	0.8665	0.974583
chr15	37502494	37502563	intergenic	NA:NA-NA	NA	hypo	unmutCLL_NBCB	0.71824	0.99322	0.918364	1
chr15	38330826	38330901	genebody	chr15:38276966-38354541	RP11-1008C21.1;ENSG00000259225.2;lincRNA	hypo	mutCLL_MBC,unmutCLL_NBCB	0.65177	0.99967	0.63702	0.92633
chr15	40379774	40379795	promoter	chr15:40381032-40381587	RP11-521C20.3;ENSG00000259409.1;antisense	hypo	unmutCLL_NBCB	0.53056	0.88311	0.755409	0.923333
chr15	40697159	40697309	promoter	chr15:40697685-40728146	IVD;ENSG00000128928.4;protein_coding	hypo	unmutCLL_NBCB	0.31173	0.95473	0.521727	0.975667
chr15	41036267	41036318	genebody	chr15:41028081-41048049	RMDN3;ENSG00000137824.11;protein_coding	hypo	unmutCLL_NBCB	0.69283	0.99422	0.727818	0.9175
chr15	41529954	41530067	genebody	chr15:41523036-41574043	CHP1;ENSG00000187446.7;protein_coding	hypo	unmutCLL_NBCB	0.3335	0.97207	0.595111	0.972333
chr15	41543714	41543776	genebody	chr15:41523036-41574043	CHP1;ENSG00000187446.7;protein_coding	hypo	unmutCLL_NBCB	0.6939	0.99256	0.898227	0.963167
chr15	41774013	41774094	genebody	chr15:41700605-41775761	RTF1;ENSG00000137815.10;protein_coding	hypo	mutCLL_MBC	0.36755	0.982333	0.51867	0.93833
chr15	42148685	42148699	genebody,promoter	chr15:42140344-42186275,chr15:42144110-42144227	RNA5SP393;ENSG00000200293.1;rRNA,SPTBN5;ENSG00000137877.8;protein_coding	hypo	mutCLL_MBC	0.1306	0.9805	0.45455	0.88078
chr15	44117764	44117817	promoter	chr15:44096689-44117000,chr15:44119160-44160617	MFAP1;ENSG00000140259.6;protein_coding,WDR76;ENSG00000092470.7;protein_coding	hypo	mutCLL_MBC	0.2125	0.993	0.51155	0.96111
chr15	45394653	45394733	genebody	chr15:45384847-45406542	DUOX2;ENSG00000140279.8;protein_coding	hypo	unmutCLL_NBCB	0.7344	0.98856	0.877364	0.890667
chr15	48052528	48052586	genebody	chr15:47476297-48066420	SEMA6D;ENSG00000137872.11;protein_coding	hypo	unmutCLL_NBCB	0.59768	0.96889	0.63225	0.942667
chr15	51047222	51047237	genebody	chr15:50999505-51058005	SPPL2A;ENSG00000138600.5;protein_coding	hypo	unmutCLL_NBCB	0.34633	0.988	0.845063	0.925167
chr15	51053533	51053736	genebody	chr15:50999505-51058005	SPPL2A;ENSG00000138600.5;protein_coding	hypo	unmutCLL_NBCB	0.63272	0.999	0.810867	0.926933
chr15	52307812	52307890	genebody	chr15:52244302-52358462,chr15:52303195-52311292	CTD-2650P22.1;ENSG00000259438.1;lincRNA,MAPK6;ENSG00000069956.7;protein_coding	hypo	mutCLL_MBC	0.5218	0.994778	0.65018	0.97608
chr15	52581846	52581939	genebody	chr15:52484518-52587995	MYO5C;ENSG00000128833.8;protein_coding	hypo	unmutCLL_NBCB	0.32052	0.996	0.730606	0.980667
chr15	52581873	52581939	genebody	chr15:52484518-52587995	MYO5C;ENSG00000128833.8;protein_coding	hypo	mutCLL_MBC	0.3326	1	0.58736	0.94833
chr15	52796941	52797059	genebody	chr15:52599479-52821247	MYO5A;ENSG00000197535.10;protein_coding	hypo	unmutCLL_NBCB	0.67479	0.9935	0.804879	0.971111
chr15	56093127	56093162	intergenic	NA:NA-NA	NA	hypo	unmutCLL_NBCB	0.7204	0.99444	0.798455	0.953667
chr15	56876482	56876517	genebody	chr15:56835149-56921790	RP11-1129I3.1;ENSG00000260392.1;sense_overlapping	hypo	unmutCLL_NBCB	0.71423	0.98033	0.87795	0.921333
chr15	57730844	57730904	genebody	chr15:57668164-57842925	CGNL1;ENSG00000128849.9;protein_coding	hypo	unmutCLL_NBCB	0.71791	0.98367	0.9021	0.919833
chr15	58782954	58782980	genebody	chr15:58245621-58790065,chr15:58702767-58861151,chr15:58727088-58790934	ALDH1A2;ENSG00000128918.10;protein_coding,LIPC;ENSG00000166035.6;protein_coding,RP11-355N15.1;ENSG00000259293.1;antisense	hypo	mutCLL_MBC	0.1957	0.975667	0.56421	0.95878
chr15	59531138	59531328	genebody	chr15:59427112-59665099	MYO1E;ENSG00000157483.4;protein_coding	hypo	unmutCLL_NBCB	0.6869	0.99813	0.741409	0.991667
chr15	59531177	59531264	genebody	chr15:59427112-59665099	MYO1E;ENSG00000157483.4;protein_coding	hypo	mutCLL_MBC	0.7024	0.999556	0.70391	0.994
chr15	59668597	59668737	genebody,promoter	chr15:59427112-59665099,chr15:59664891-59815748	FAM81A;ENSG00000157470.7;protein_coding,MYO1E;ENSG00000157483.4;protein_coding	hypo	unmutCLL_NBCB	0.6374	0.98583	0.770792	0.970667
chr15	59702236	59702363	genebody,promoter	chr15:59664891-59815748,chr15:59701103-59701214	FAM81A;ENSG00000157470.7;protein_coding,Y_RNA;ENSG00000200252.1;misc_RNA	hypo	mutCLL_MBC,unmutCLL_NBCB	0.11874	0.984	0.27986	0.9784
chr15	64438529	64438641	intergenic	NA:NA-NA	NA	hypo	unmutCLL_NBCB	0.70018	0.97889	0.653818	0.898167
chr15	64769558	64769580	genebody	chr15:64752940-64978264	ZNF609;ENSG00000180357.5;protein_coding	hypo	mutCLL_MBC	0.81915	1	0.71961	0.99656
chr15	64769558	64769583	genebody	chr15:64752940-64978264	ZNF609;ENSG00000180357.5;protein_coding	hypo	unmutCLL_NBCB	0.74343	0.99408	0.719606	0.996556
chr15	64826301	64826370	genebody	chr15:64752940-64978264	ZNF609;ENSG00000180357.5;protein_coding	hypo	unmutCLL_NBCB	0.71453	0.99933	0.940985	0.995
chr15	66764137	66764195	genebody	chr15:66679154-66784650	MAP2K1;ENSG00000169032.5;protein_coding	hypo	mutCLL_MBC,unmutCLL_NBCB	0.1386	1	0.40691	0.99911
chr15	67004275	67004286	genebody	chr15:66994565-67074338	SMAD6;ENSG00000137834.10;protein_coding	hypo	unmutCLL_NBCB	0.6807	0.99011	0.797955	0.938167
chr15	67441710	67441836	genebody,promoter	chr15:67356100-67487533,chr15:67435071-67439277	RP11-342M21.2;ENSG00000259202.1;protein_coding,SMAD3;ENSG00000166949.11;protein_coding	hypo	unmutCLL_NBCB	0.62995	0.97944	0.630067	0.960667
chr15	67927671	67927807	genebody	chr15:67835046-68099461	MAP2K5;ENSG00000137764.15;protein_coding	hypo	unmutCLL_NBCB	0.65208	0.99767	0.931212	0.978917
chr15	69075703	69075786	genebody	chr15:69070873-69113236	ANP32A;ENSG00000140350.11;protein_coding	hypo	unmutCLL_NBCB	0.68753	0.99811	0.856773	0.973333
chr15	69103162	69103254	genebody	chr15:69070873-69113236	ANP32A;ENSG00000140350.11;protein_coding	hypo	unmutCLL_NBCB	0.57552	0.99289	0.704545	0.89
chr15	69957071	69957309	genebody	chr15:69884467-69988089	RP11-279F6.3;ENSG00000259641.1;lincRNA	hypo	unmutCLL_NBCB	0.73286	0.99229	0.766803	0.982556
chr15	70177908	70177975	intergenic	NA:NA-NA	NA	hypo	unmutCLL_NBCB	0.69227	0.99956	0.63085	0.944333
chr15	71055786	71055834	promoter	chr15:70946892-71055932	UACA;ENSG00000137831.10;protein_coding	hyper	mutCLL_MBC	0.178667	0.0168667	0.40606	0.102
chr15	71759303	71759332	genebody	chr15:71389290-72075722	THSD4;ENSG00000187720.10;protein_coding	hypo	unmutCLL_NBCB	0.6925	0.98956	0.910727	0.914667
chr15	73690813	73690855	intergenic	NA:NA-NA	NA	hypo	unmutCLL_NBCB	0.60847	0.98844	0.870313	0.921667
chr15	73889486	73889512	genebody	chr15:73852354-73926475	NPTN;ENSG00000156642.12;protein_coding	hypo	unmutCLL_NBCB	0.74032	0.99533	0.896273	0.999333
chr15	74480665	74480737	genebody	chr15:74471806-74504608	STRA6;ENSG00000137868.14;protein_coding	hypo	mutCLL_MBC,unmutCLL_NBCB	0.72466	0.98733	0.54652	0.80667
chr15	74679844	74679905	intergenic	NA:NA-NA	NA	hypo	mutCLL_MBC	0.400225	0.994	0.5198	0.97783
chr15	74914420	74914436	genebody	chr15:74890840-74932057	CLK3;ENSG00000179335.14;protein_coding	hypo	mutCLL_MBC	0.67625	0.9965	0.64118	0.94411
chr15	74920229	74920372	genebody	chr15:74890840-74932057	CLK3;ENSG00000179335.14;protein_coding	hypo	unmutCLL_NBCB	0.44732	0.97658	0.560303	0.911444
chr15	74920274	74920372	genebody	chr15:74890840-74932057	CLK3;ENSG00000179335.14;protein_coding	hypo	mutCLL_MBC	0.3764	0.968167	0.42967	0.90578
chr15	75351507	75351557	genebody	chr15:75315895-75409803	PPCDC;ENSG00000138621.7;protein_coding	hypo	unmutCLL_NBCB	0.73745	0.99822	0.9616	0.966
chr15	75501070	75501095	genebody	chr15:75487983-75504510	C15orf39;ENSG00000167173.14;protein_coding	hypo	unmutCLL_NBCB	0.72327	0.99889	0.753786	0.992833
chr15	75540444	75540545	intergenic	NA:NA-NA	NA	hypo	unmutCLL_NBCB	0.64609	0.96211	0.8611	0.945667
chr15	75876633	75876719	genebody	chr15:75819490-75893546	CTD-2323K18.1;ENSG00000260269.1;processed_transcript	hypo	unmutCLL_NBCB	0.25987	0.99756	0.21955	0.885167
chr15	77245375	77245434	intergenic	NA:NA-NA	NA	hypo	mutCLL_MBC	0.330667	0.999556	0.4785	0.99275
chr15	79306945	79307130	genebody	chr15:79252288-79383115	RASGRF1;ENSG00000058335.11;protein_coding	hypo	unmutCLL_NBCB	0.49044	0.99883	0.643922	0.968933
chr15	79307036	79307130	genebody	chr15:79252288-79383115	RASGRF1;ENSG00000058335.11;protein_coding	hypo	mutCLL_MBC	0.2599	1	0.27494	0.90689
chr15	79450214	79450291	intergenic	NA:NA-NA	NA	hypo	unmutCLL_NBCB	0.6207	0.92889	0.7307	0.895333
chr15	83517921	83518042	genebody	chr15:83509837-83654661	HOMER2;ENSG00000103942.8;protein_coding	hypo	mutCLL_MBC,unmutCLL_NBCB	0.42496	0.97144	0.71238	0.97511
chr15	87115358	87115459	genebody	chr15:86685226-87572283	AGBL1;ENSG00000166748.8;protein_coding	hypo	unmutCLL_NBCB	0.62709	0.88856	0.858708	0.8914
chr15	89523076	89523142	intergenic	NA:NA-NA	NA	hypo	unmutCLL_NBCB	0.63067	0.98478	0.705455	0.880833
chr15	90304831	90304894	promoter	chr15:90303821-90321982	MESP2;ENSG00000188095.3;protein_coding	hypo	unmutCLL_NBCB	0.35913	0.99167	0.447318	0.872667
chr15	90304831	90304972	promoter	chr15:90303821-90321982	MESP2;ENSG00000188095.3;protein_coding	hypo	mutCLL_MBC	0.359133	0.991667	0.58697	0.87675
chr15	90350667	90350712	genebody	chr15:90328119-90358633	ANPEP;ENSG00000166825.9;protein_coding	hypo	unmutCLL_NBCB	0.70287	0.97722	0.76275	0.923167
chr15	90578509	90578558	genebody	chr15:90544623-90625438	ZNF710;ENSG00000140548.5;protein_coding	hypo	unmutCLL_NBCB	0.55993	0.92511	0.8107	0.983667
chr15	90594151	90594235	genebody	chr15:90544623-90625438	ZNF710;ENSG00000140548.5;protein_coding	hypo	unmutCLL_NBCB	0.72157	1	0.695788	0.979444
chr15	90937101	90937258	genebody	chr15:90931449-91045475,chr15:90936721-90941113	IQGAP1;ENSG00000140575.8;protein_coding,RP11-154B12.3;ENSG00000259177.1;antisense	hypo	unmutCLL_NBCB	0.72611	0.99811	0.815969	0.975733
chr15	91398610	91398664	promoter	chr15:91399166-91399437	RN7SL363P;ENSG00000241869.2;misc_RNA	hypo	mutCLL_MBC	0.35385	0.999833	0.65854	0.96467
chr15	92396468	92396497	promoter	chr15:92396924-92715665	SLCO3A1;ENSG00000176463.9;protein_coding	hyper	unmutCLL_NBCB	0.28708	0.011167	0.153879	0.0418
chr15	92459009	92459057	genebody	chr15:92396924-92715665	SLCO3A1;ENSG00000176463.9;protein_coding	hypo	unmutCLL_NBCB	0.37442	0.94189	0.3772	0.832167
chr15	92516114	92516147	genebody	chr15:92396924-92715665	SLCO3A1;ENSG00000176463.9;protein_coding	hypo	unmutCLL_NBCB	0.66699	0.99389	0.859	0.899833
chr15	93379943	93380014	intergenic	NA:NA-NA	NA	hypo	unmutCLL_NBCB	0.73198	0.99233	0.8961	0.995
chr15	93928803	93928865	genebody	chr15:93855785-94112712	RP11-266O8.1;ENSG00000257060.2;lincRNA	hypo	unmutCLL_NBCB	0.7196	0.97933	0.950242	0.989667
chr15	94736348	94736361	intergenic	NA:NA-NA	NA	hypo	mutCLL_MBC	0.783	1	0.64064	0.99856
chr15	94843456	94843553	genebody	chr15:94774766-95023632	MCTP2;ENSG00000140563.10;protein_coding	hypo	unmutCLL_NBCB	0.72172	0.9834	0.909144	0.987
chr15	98982363	98982462	genebody	chr15:98980390-99057611	FAM169B;ENSG00000185087.7;protein_coding	hypo	unmutCLL_NBCB	0.72901	0.99067	0.834485	0.967778
chr15	99190752	99190762	promoter	chr15:99190179-99190600,chr15:99192199-99507759	IGF1R;ENSG00000140443.9;protein_coding,RP11-35O15.1;ENSG00000259424.1;antisense	hyper	mutCLL_MBC,unmutCLL_NBCB	0.29227	0	0.37855	0.055333
chr15	99460228	99460328	genebody	chr15:99192199-99507759	IGF1R;ENSG00000140443.9;protein_coding	hypo	unmutCLL_NBCB	0.61708	0.96847	0.931932	0.982333
chr15	99609614	99609715	genebody	chr15:99497377-99646030	RP11-654A16.3;ENSG00000259475.1;antisense	hypo	unmutCLL_NBCB	0.69798	0.99644	0.781889	0.905
chr15	99995300	99995332	intergenic	NA:NA-NA	NA	hypo	mutCLL_MBC,unmutCLL_NBCB	0.1441	0.984	0.14676	0.97533
chr16	10603071	10603142	intergenic	NA:NA-NA	NA	hypo	unmutCLL_NBCB	0.51643	0.96644	0.725091	0.904333
chr16	10873447	10873492	genebody	chr16:10854775-10912651	TVP23A;ENSG00000166676.10;protein_coding	hypo	unmutCLL_NBCB	0.61448	0.97767	0.97525	0.988667
chr16	11157493	11157569	genebody	chr16:11038344-11276046	CLEC16A;ENSG00000038532.10;protein_coding	hypo	unmutCLL_NBCB	0.67554	0.99322	0.90785	0.985
chr16	11466394	11466468	genebody	chr16:11453701-11617444	CTD-3088G3.8;ENSG00000188897.4;protein_coding	hypo	unmutCLL_NBCB	0.72682	0.99411	0.854982	0.9598
chr16	11637897	11637934	intergenic	NA:NA-NA	NA	hypo	unmutCLL_NBCB	0.5714	0.996	0.794	0.908
chr16	11765806	11765857	genebody	chr16:11762269-11773015	SNN;ENSG00000184602.5;protein_coding	hypo	unmutCLL_NBCB	0.58167	0.98789	0.704864	0.91
chr16	11808366	11808411	genebody	chr16:11772935-11836734	TXNDC11;ENSG00000153066.8;protein_coding	hypo	mutCLL_MBC	0.84285	0.986333	0.731	0.99978
chr16	12358374	12358498	genebody	chr16:12070593-12668146	SNX29;ENSG00000048471.9;protein_coding	hypo	mutCLL_MBC,unmutCLL_NBCB	0.56517	0.97758	0.69123	0.95267
chr16	12415828	12415889	genebody	chr16:12070593-12668146	SNX29;ENSG00000048471.9;protein_coding	hypo	mutCLL_MBC	0.06915	0.995	0.41679	0.94722
chr16	12415828	12415892	genebody	chr16:12070593-12668146	SNX29;ENSG00000048471.9;protein_coding	hypo	unmutCLL_NBCB	0.10438	0.9975	0.416788	0.947222
chr16	12496198	12496436	genebody	chr16:12070593-12668146	SNX29;ENSG00000048471.9;protein_coding	hypo	mutCLL_MBC,unmutCLL_NBCB	0.27633	0.9951	0.6481	0.98771
chr16	125159	125212	promoter	chr16:108057-126354,chr16:127005-135852	MPG;ENSG00000103152.7;protein_coding,RHBDF1;ENSG00000007384.11;protein_coding	hypo	unmutCLL_NBCB	0.73185	1	0.9069	0.988833
chr16	12530759	12530804	genebody	chr16:12070593-12668146	SNX29;ENSG00000048471.9;protein_coding	hypo	unmutCLL_NBCB	0.69543	0.98589	0.924182	0.969833
chr16	129942	129993	genebody,promoter	chr16:108057-126354,chr16:127005-135852	MPG;ENSG00000103152.7;protein_coding,RHBDF1;ENSG00000007384.11;protein_coding	hypo	mutCLL_MBC,unmutCLL_NBCB	0.54711	1	0.66319	0.97489
chr16	135666	135742	genebody,promoter	chr16:127005-135852,chr16:134272-188859,chr16:140628-141100	MPG;ENSG00000103152.7;protein_coding,NPRL3;ENSG00000103148.11;protein_coding,Z69720.2;ENSG00000269482.1;antisense	hypo	mutCLL_MBC	0.158708	0.834667	0.36381	0.76678
chr16	1373763	1373910	genebody,promoter	chr16:1355547-1377019,chr16:1367891-1372846	LA16c-358B7.3;ENSG00000261505.1;antisense,UBE2I;ENSG00000103275.14;protein_coding	hypo	unmutCLL_NBCB	0.66374	0.99321	0.904574	0.936
chr16	14094143	14094239	intergenic	NA:NA-NA	NA	hypo	unmutCLL_NBCB	0.12376	0.988	0.268792	0.966667
chr16	14490309	14490434	intergenic	NA:NA-NA	NA	hypo	unmutCLL_NBCB	0.55359	0.98539	0.876507	0.942267
chr16	1542788	1542886	promoter	chr16:1535886-1538982,chr16:1543344-1560458	PTX4;ENSG00000251692.3;protein_coding,TELO2;ENSG00000100726.10;protein_coding	hypo	unmutCLL_NBCB	0.66163	0.93311	0.892136	0.846167
chr16	1699953	1700089	genebody	chr16:1662325-1727909,chr16:1682259-1736716	CRAMP1L;ENSG00000007545.11;protein_coding,LA16c-431H6.6;ENSG00000261732.1;protein_coding	hypo	unmutCLL_NBCB	0.5313	0.99656	0.781677	0.9888
chr16	17227861	17227927	genebody,promoter	chr16:17195625-17564738,chr16:17228360-17232593	CTD-2576D5.4;ENSG00000261448.1;antisense,XYLT1;ENSG00000103489.7;protein_coding	hypo	unmutCLL_NBCB	0.23498	0.996	0.563424	1
chr16	17375098	17375204	genebody	chr16:17195625-17564738	XYLT1;ENSG00000103489.7;protein_coding	hypo	unmutCLL_NBCB	0.73485	0.997	0.803591	0.987333
chr16	17438839	17438856	genebody	chr16:17195625-17564738	XYLT1;ENSG00000103489.7;protein_coding	hypo	unmutCLL_NBCB	0.51081	0.97578	0.83805	0.997
chr16	17499156	17499260	genebody	chr16:17195625-17564738	XYLT1;ENSG00000103489.7;protein_coding	hypo	unmutCLL_NBCB	0.4935	0.98207	0.850383	0.964667
chr16	1831443	1831473	genebody,promoter	chr16:1823207-1831709,chr16:1826712-1843701,chr16:1832901-1839192	EME2;ENSG00000197774.8;protein_coding,NUBP2;ENSG00000095906.12;protein_coding,SPSB3;ENSG00000162032.11;protein_coding	hypo	mutCLL_MBC,unmutCLL_NBCB	0.53307	0.89089	0.59073	0.88111
chr16	1893223	1893249	genebody,promoter	chr16:1883983-1934295,chr16:1891020-1893548	LA16c-429E7.1;ENSG00000260541.1;sense_overlapping,MEIOB;ENSG00000162039.10;protein_coding	hypo	mutCLL_MBC,unmutCLL_NBCB	0.72213	0.99378	0.72658	0.99411
chr16	19157728	19157828	genebody	chr16:19125323-19184900	CTD-2349B8.1;ENSG00000261427.2;protein_coding	hypo	unmutCLL_NBCB	0.70517	0.97144	0.826182	0.939167
chr16	19180971	19181034	genebody,promoter	chr16:19125323-19184900,chr16:19179292-19279652	CTD-2349B8.1;ENSG00000261427.2;protein_coding,SYT17;ENSG00000103528.12;protein_coding	hypo	unmutCLL_NBCB	0.61066	0.92189	0.938833	0.936667
chr16	19534797	19534812	promoter	chr16:19513014-19533467,chr16:19535132-19564730	CCP110;ENSG00000103540.12;protein_coding,GDE1;ENSG00000006007.7;protein_coding	hypo	unmutCLL_NBCB	0.18053	0.44789	0.392364	0.506167
chr16	19568828	19568999	promoter	chr16:19566561-19718115	C16orf62;ENSG00000103544.10;protein_coding	hypo	unmutCLL_NBCB	0.6873	0.99543	0.874152	0.979429
chr16	19569962	19570032	genebody	chr16:19566561-19718115	C16orf62;ENSG00000103544.10;protein_coding	hypo	unmutCLL_NBCB	0.69696	0.98422	0.808773	0.979
chr16	21718251	21718344	genebody	chr16:21689834-21772050	OTOA;ENSG00000155719.12;protein_coding	hypo	mutCLL_MBC,unmutCLL_NBCB	0.54311	0.97233	0.48616	0.80444
chr16	21821387	21821460	genebody	chr16:21807950-21831731	RRN3P1;ENSG00000248124.3;pseudogene	hypo	unmutCLL_NBCB	0.67418	0.99606	0.752764	0.983933
chr16	22248746	22248850	genebody	chr16:22217602-22298554	EEF2K;ENSG00000103319.7;protein_coding	hypo	unmutCLL_NBCB	0.11997	0.98975	0.90803	0.989222
chr16	2291405	2291485	genebody,promoter	chr16:2285689-2286914,chr16:2289395-2302301,chr16:2290487-2291819	ECI1;ENSG00000167969.8;protein_coding,RP11-304L19.11;ENSG00000261663.1;antisense,RP11-304L19.12;ENSG00000259780.2;lincRNA	hypo	unmutCLL_NBCB	0.72398	0.99656	0.758136	0.942
chr16	2293142	2293149	genebody	chr16:2289395-2302301	ECI1;ENSG00000167969.8;protein_coding	hypo	unmutCLL_NBCB	0.44413	0.99578	0.831591	0.923667
chr16	23916592	23916634	genebody	chr16:23847321-24231932	PRKCB;ENSG00000166501.8;protein_coding	hypo	unmutCLL_NBCB	0.70151	0.99656	0.925389	0.997167
chr16	24950881	24950980	genebody	chr16:24930705-25026987	ARHGAP17;ENSG00000140750.12;protein_coding	hypo	unmutCLL_NBCB	0.60664	0.99111	0.824556	0.969833
chr16	2558365	2558424	genebody	chr16:2546032-2570219	RP11-20I23.1;ENSG00000260272.1;protein_coding	hypo	unmutCLL_NBCB	0.13323	1	0.5169	0.988
chr16	2559164	2559195	genebody,promoter	chr16:2546032-2570219,chr16:2563870-2570219,chr16:2563965-2577956	ATP6C;ENSG00000259784.1;protein_coding,ATP6V0C;ENSG00000185883.6;protein_coding,RP11-20I23.1;ENSG00000260272.1;protein_coding	hypo	unmutCLL_NBCB	0.56648	0.99467	0.907	0.975833
chr16	2589330	2589375	promoter	chr16:2587964-2653189	PDPK1;ENSG00000140992.14;protein_coding	hypo	unmutCLL_NBCB	0.68863	0.96133	0.688567	0.893111
chr16	27241701	27241751	genebody	chr16:27236311-27280115	NSMCE1;ENSG00000169189.12;protein_coding	hypo	unmutCLL_NBCB	0.25461	0.98722	0.6755	0.981833
chr16	27279140	27279222	promoter	chr16:27236311-27280115,chr16:27279525-27301813	CTD-3203P2.2;ENSG00000245888.2;protein_coding,NSMCE1;ENSG00000169189.12;protein_coding	hypo	unmutCLL_NBCB	0.66108	0.9931	0.889985	0.942667
chr16	27357772	27357926	genebody	chr16:27324988-27376099	IL4R;ENSG00000077238.9;protein_coding	hypo	unmutCLL_NBCB	0.31036	0.98858	0.551567	0.9705
chr16	27357781	27357926	genebody	chr16:27324988-27376099	IL4R;ENSG00000077238.9;protein_coding	hypo	mutCLL_MBC	0.283778	0.992333	0.47189	0.94333
chr16	27475089	27475127	genebody	chr16:27470875-27561234	GTF3C1;ENSG00000077235.13;protein_coding	hypo	unmutCLL_NBCB	0.61783	0.99083	0.895227	0.986111
chr16	2760408	2760480	promoter	chr16:2763019-2763101	AC092117.1;ENSG00000222055.1;miRNA	hypo	mutCLL_MBC	0.340667	0.994	0.56516	0.90892
chr16	2760408	2760490	promoter	chr16:2763019-2763101	AC092117.1;ENSG00000222055.1;miRNA	hypo	unmutCLL_NBCB	0.36579	0.9964	0.564924	0.908917
chr16	27676284	27676349	genebody	chr16:27561453-27791690	KIAA0556;ENSG00000047578.8;protein_coding	hypo	unmutCLL_NBCB	0.63043	0.98833	0.784	0.97
chr16	28549400	28549463	promoter	chr16:28548605-28550495	NUPR1;ENSG00000176046.7;protein_coding	hypo	unmutCLL_NBCB	0.69256	0.9992	0.845344	0.958167
chr16	2889876	2889914	genebody	chr16:2889568-2892745	PRSS30P;ENSG00000172460.10;pseudogene	hypo	unmutCLL_NBCB	0.69637	0.97333	0.710909	0.865333
chr16	28913515	28913582	genebody	chr16:28889725-28915830	ATP2A1;ENSG00000196296.9;protein_coding	hypo	mutCLL_MBC,unmutCLL_NBCB	0.3163	0.98444	0.49309	0.93811
chr16	28924072	28924141	genebody	chr16:28915741-28947847	RABEP2;ENSG00000177548.8;protein_coding	hypo	unmutCLL_NBCB	0.73312	0.9955	0.730295	0.956333
chr16	29019867	29019885	intergenic	NA:NA-NA	NA	hypo	unmutCLL_NBCB	0.73939	0.999	0.869773	0.9475
chr16	29617404	29617449	intergenic	NA:NA-NA	NA	hypo	unmutCLL_NBCB	0.73299	0.99511	0.8866	0.980833
chr16	29666055	29666072	intergenic	NA:NA-NA	NA	hypo	unmutCLL_NBCB	0.5055	0.99758	0.908621	0.994667
chr16	29776578	29776632	intergenic	NA:NA-NA	NA	hypo	unmutCLL_NBCB	0.7376	0.99589	0.79465	0.901
chr16	2985201	2985224	genebody	chr16:2961937-3001209	FLYWCH1;ENSG00000059122.12;protein_coding	hypo	unmutCLL_NBCB	0.62687	0.95389	0.8848	0.865167
chr16	30083236	30083354	promoter	chr16:30087298-30096698	PPP4C;ENSG00000149923.9;protein_coding	hypo	unmutCLL_NBCB	0.68568	0.99878	0.793318	0.941
chr16	30550847	30550940	genebody,promoter	chr16:30537243-30546173,chr16:30537243-30546668,chr16:30545547-30569600	AC002310.13;ENSG00000260869.1;protein_coding,ZNF747;ENSG00000169955.6;protein_coding,ZNF747;ENSG00000261459.1;protein_coding	hypo	unmutCLL_NBCB	0.71273	0.99956	0.909227	0.946
chr16	30562412	30562548	genebody	chr16:30545547-30569600	AC002310.13;ENSG00000260869.1;protein_coding	hypo	mutCLL_MBC,unmutCLL_NBCB	0.20591	0.99887	0.44607	0.98707
chr16	30609329	30609361	genebody	chr16:30597227-30619914	RP11-146F11.5;ENSG00000260167.1;antisense	hypo	unmutCLL_NBCB	0.62697	0.99389	0.718773	0.911
chr16	31118542	31118605	promoter	chr16:31117427-31124110,chr16:31120550-31120634	AC135050.1;ENSG00000252809.2;miRNA,BCKDK;ENSG00000103507.9;protein_coding	hypo	unmutCLL_NBCB	0.59414	0.9974	0.942127	0.995667
chr16	31141236	31141251	genebody,promoter	chr16:31127074-31142714,chr16:31142753-31143198	KAT8;ENSG00000103510.15;protein_coding,RP11-388M20.2;ENSG00000261385.1;antisense	hypo	unmutCLL_NBCB	0.696	0.99811	0.809364	0.9695
chr16	31358496	31358640	intergenic	NA:NA-NA	NA	hypo	unmutCLL_NBCB	0.73848	0.998	0.594091	0.965167
chr16	314739	314910	genebody,promoter	chr16:284544-319942,chr16:299545-319942,chr16:318725-333003	ARHGDIG;ENSG00000242173.4;protein_coding,ITFG3;ENSG00000167930.11;protein_coding,ITFG3;ENSG00000269881.1;protein_coding	hypo	unmutCLL_NBCB	0.69083	0.98303	0.844838	0.967067
chr16	318807	318872	genebody,promoter	chr16:284544-319942,chr16:299545-319942,chr16:318299-325980,chr16:318725-333003	ARHGDIG;ENSG00000242173.4;protein_coding,ITFG3;ENSG00000167930.11;protein_coding,ITFG3;ENSG00000269881.1;protein_coding,RGS11;ENSG00000076344.11;protein_coding	hypo	mutCLL_MBC	0.759475	0.966875	0.67356	0.94867
chr16	33950623	33950676	promoter	chr16:33945948-33946021	AC136932.2;ENSG00000265616.1;miRNA	hypo	mutCLL_MBC,unmutCLL_NBCB	0.67097	0.99867	0.71633	0.99333
chr16	33955908	33955927	intergenic	NA:NA-NA	NA	hypo	mutCLL_MBC,unmutCLL_NBCB	0.5326	0.93267	0.55945	0.94922
chr16	358538	358641	genebody	chr16:337439-402673	AXIN1;ENSG00000103126.10;protein_coding	hypo	mutCLL_MBC,unmutCLL_NBCB	0.046721	0.99646	0.088773	0.97262
chr16	359184	359245	genebody	chr16:337439-402673	AXIN1;ENSG00000103126.10;protein_coding	hypo	mutCLL_MBC,unmutCLL_NBCB	0.1133	0.98358	0.17573	0.94683
chr16	3748402	3748451	genebody	chr16:3701639-3767598	TRAP1;ENSG00000126602.6;protein_coding	hypo	unmutCLL_NBCB	0.66206	0.99622	0.721091	0.999
chr16	376860	376997	genebody	chr16:337439-402673	AXIN1;ENSG00000103126.10;protein_coding	hypo	unmutCLL_NBCB	0.72102	0.99567	0.8867	0.9668
chr16	3779792	3779868	genebody	chr16:3775054-3930727	CREBBP;ENSG00000005339.8;protein_coding	hypo	unmutCLL_NBCB	0.73321	0.99844	0.76085	0.889
chr16	3780689	3780790	genebody	chr16:3775054-3930727	CREBBP;ENSG00000005339.8;protein_coding	hypo	unmutCLL_NBCB	0.59153	0.98289	0.844955	0.975667
chr16	3781039	3781143	genebody	chr16:3775054-3930727	CREBBP;ENSG00000005339.8;protein_coding	hypo	unmutCLL_NBCB	0.58249	0.99633	0.761545	0.934667
chr16	3782729	3782769	genebody	chr16:3775054-3930727	CREBBP;ENSG00000005339.8;protein_coding	hypo	unmutCLL_NBCB	0.59275	1	0.8883	0.999
chr16	3785388	3785457	genebody	chr16:3775054-3930727	CREBBP;ENSG00000005339.8;protein_coding	hypo	unmutCLL_NBCB	0.39242	0.99992	0.859409	0.989556
chr16	3868991	3869025	genebody	chr16:3775054-3930727	CREBBP;ENSG00000005339.8;protein_coding	hypo	unmutCLL_NBCB	0.70633	0.96867	0.765591	0.937333
chr16	4055925	4055976	genebody	chr16:4003387-4166186	ADCY9;ENSG00000162104.5;protein_coding	hypo	unmutCLL_NBCB	0.73572	0.99256	0.8789	0.9275
chr16	412778	412805	intergenic	NA:NA-NA	NA	hypo	unmutCLL_NBCB	0.68398	0.94689	0.821909	0.920333
chr16	4622546	4622596	genebody	chr16:4606490-4650715	C16orf96;ENSG00000205832.7;protein_coding	hypo	unmutCLL_NBCB	0.63919	0.99067	0.843682	0.940833
chr16	46919399	46919564	promoter	chr16:46918289-46965209	GPT2;ENSG00000166123.9;protein_coding	hypo	unmutCLL_NBCB	0.38412	0.94667	0.68554	0.948889
chr16	46919410	46919560	promoter	chr16:46918289-46965209	GPT2;ENSG00000166123.9;protein_coding	hypo	mutCLL_MBC	0.3031	0.91825	0.68324	0.939
chr16	46920040	46920123	promoter	chr16:46918289-46965209	GPT2;ENSG00000166123.9;protein_coding	hypo	unmutCLL_NBCB	0.72373	0.99556	0.888273	0.982
chr16	46921100	46921176	genebody	chr16:46918289-46965209	GPT2;ENSG00000166123.9;protein_coding	hypo	mutCLL_MBC	0.135567	0.997444	0.55699	0.95222
chr16	46940914	46941128	genebody	chr16:46918289-46965209	GPT2;ENSG00000166123.9;protein_coding	hypo	unmutCLL_NBCB	0.25979	0.995	0.470705	0.95325
chr16	46940992	46941092	genebody	chr16:46918289-46965209	GPT2;ENSG00000166123.9;protein_coding	hypo	mutCLL_MBC	0.12535	0.9915	0.37521	0.93956
chr16	46943623	46943743	genebody	chr16:46918289-46965209	GPT2;ENSG00000166123.9;protein_coding	hypo	unmutCLL_NBCB	0.71768	0.99767	0.704855	0.989733
chr16	46943623	46943763	genebody	chr16:46918289-46965209	GPT2;ENSG00000166123.9;protein_coding	hypo	mutCLL_MBC	0.714778	0.997667	0.69449	0.99129
chr16	4709259	4709308	genebody	chr16:4666493-4740975	MGRN1;ENSG00000102858.8;protein_coding	hypo	mutCLL_MBC,unmutCLL_NBCB	0.56797	0.98	0.69704	0.98233
chr16	4714764	4714793	genebody	chr16:4666493-4740975	MGRN1;ENSG00000102858.8;protein_coding	hypo	unmutCLL_NBCB	0.74211	0.99678	0.84055	1
chr16	4745165	4745390	promoter	chr16:4743694-4745860	NUDT16L1;ENSG00000168101.10;protein_coding	hypo	unmutCLL_NBCB	0.67453	0.96929	0.799533	0.938444
chr16	48573799	48573946	genebody	chr16:48572636-48654059	N4BP1;ENSG00000102921.3;protein_coding	hypo	unmutCLL_NBCB	0.42077	0.9981	0.773833	0.948611
chr16	48573849	48573946	genebody	chr16:48572636-48654059	N4BP1;ENSG00000102921.3;protein_coding	hypo	mutCLL_MBC	0.387	0.9985	0.6627	0.96222
chr16	49242159	49242218	intergenic	NA:NA-NA	NA	hypo	unmutCLL_NBCB	0.68047	0.99	0.753545	0.941167
chr16	49315899	49315971	promoter	chr16:49311827-49315742	CBLN1;ENSG00000102924.7;protein_coding	hyper	unmutCLL_NBCB	0.38416	0.046615	0.220247	0.07975
chr16	49316317	49316459	promoter	chr16:49311827-49315742,chr16:49321340-49324138	CBLN1;ENSG00000102924.7;protein_coding,RP11-491F9.1;ENSG00000260614.1;antisense	hyper	unmutCLL_NBCB	0.37288	0.020028	0.244376	0.115394
chr16	49495747	49495858	promoter	chr16:49500016-49503786	RP11-189E14.4;ENSG00000261623.1;lincRNA	hypo	unmutCLL_NBCB	0.72749	1	0.745682	0.9715
chr16	49549964	49550044	genebody	chr16:49521434-49891830	ZNF423;ENSG00000102935.7;protein_coding	hypo	unmutCLL_NBCB	0.67403	0.99467	0.666259	0.964167
chr16	50252385	50252483	genebody	chr16:50186828-50269221	PAPD5;ENSG00000121274.8;protein_coding	hypo	mutCLL_MBC	0.5896	0.998167	0.671	0.96956
chr16	50637403	50637465	genebody	chr16:50582240-50670647	NKD1;ENSG00000140807.4;protein_coding	hypo	mutCLL_MBC	0.2449	0.982833	0.3759	0.933
chr16	50720054	50720118	promoter	chr16:50700210-50715264	SNX20;ENSG00000167208.10;protein_coding	hypo	unmutCLL_NBCB	0.1086	0.99783	0.397782	0.9138
chr16	50720060	50720118	promoter	chr16:50700210-50715264	SNX20;ENSG00000167208.10;protein_coding	hypo	mutCLL_MBC	0.117175	0.999417	0.36507	0.90253
chr16	5075206	5075272	genebody	chr16:5060909-5092251,chr16:5074844-5084142	NAGPA;ENSG00000103174.7;protein_coding,RP11-165E7.1;ENSG00000267072.1;processed_transcript	hypo	unmutCLL_NBCB	0.63986	0.96844	0.469815	0.870333
chr16	50942547	50942655	intergenic	NA:NA-NA	NA	hypo	unmutCLL_NBCB	0.62194	0.96956	0.7775	0.8715
chr16	51917545	51917633	intergenic	NA:NA-NA	NA	hypo	unmutCLL_NBCB	0.71983	0.99044	0.744136	0.9
chr16	57000381	57000452	genebody	chr16:56995761-57017757	CETP;ENSG00000087237.6;protein_coding	hypo	unmutCLL_NBCB	0.67157	0.98422	0.757273	0.976667
chr16	57014555	57014572	genebody	chr16:56995761-57017757	CETP;ENSG00000087237.6;protein_coding	hypo	unmutCLL_NBCB	0.6302	0.99844	0.8794	0.957333
chr16	58442098	58442115	intergenic	NA:NA-NA	NA	hypo	unmutCLL_NBCB	0.67522	0.99178	0.702611	0.979
chr16	58654399	58654438	genebody,promoter	chr16:58553854-58663790,chr16:58652578-58652668	CNOT1;ENSG00000125107.12;protein_coding,snoU13;ENSG00000239121.1;snoRNA	hypo	mutCLL_MBC	0.77335	0.988667	0.68618	0.94478
chr16	60205220	60205266	intergenic	NA:NA-NA	NA	hypo	mutCLL_MBC	0.823187	0.9885	0.63744	0.94711
chr16	60291870	60291908	intergenic	NA:NA-NA	NA	hypo	unmutCLL_NBCB	0.71488	0.98067	0.697688	0.904833
chr16	616177	616286	promoter	chr16:616994-634136,chr16:616995-619495	NHLRC4;ENSG00000257108.1;protein_coding,PIGQ;ENSG00000007541.10;protein_coding	hypo	unmutCLL_NBCB	0.61266	0.96813	0.858727	0.947417
chr16	62682063	62682149	intergenic	NA:NA-NA	NA	hypo	unmutCLL_NBCB	0.73267	0.99756	0.793455	0.953
chr16	645226	645241	genebody	chr16:639356-679272	RAB40C;ENSG00000197562.5;protein_coding	hypo	mutCLL_MBC,unmutCLL_NBCB	0.40387	0.99756	0.57124	0.94778
chr16	64784175	64784244	intergenic	NA:NA-NA	NA	hypo	unmutCLL_NBCB	0.72087	0.998	0.806045	0.971167
chr16	64841449	64841504	intergenic	NA:NA-NA	NA	hypo	unmutCLL_NBCB	0.71264	0.98492	0.785417	0.980333
chr16	665681	665994	genebody	chr16:639356-679272	RAB40C;ENSG00000197562.5;protein_coding	hypo	unmutCLL_NBCB	0.58648	0.99078	0.744163	0.96963
chr16	666123	666179	genebody	chr16:639356-679272	RAB40C;ENSG00000197562.5;protein_coding	hypo	unmutCLL_NBCB	0.60116	0.92878	0.807424	0.933667
chr16	67813993	67814026	genebody	chr16:67757004-67840555	RANBP10;ENSG00000141084.6;protein_coding	hypo	unmutCLL_NBCB	0.52323	0.93678	0.675182	0.951167
chr16	68021775	68021827	genebody,promoter	chr16:68021296-68034489,chr16:68021648-68113223	DPEP2;ENSG00000167261.9;protein_coding,DUS2;ENSG00000167264.13;protein_coding	hypo	unmutCLL_NBCB	0.62609	0.98622	0.79455	0.975833
chr16	68031350	68031419	genebody	chr16:68021296-68034489,chr16:68021648-68113223	DPEP2;ENSG00000167261.9;protein_coding,DUS2;ENSG00000167264.13;protein_coding	hypo	mutCLL_MBC	0.15448	0.998267	0.49808	0.96639
chr16	68219526	68219621	genebody,promoter	chr16:68118653-68263162,chr16:68223189-68223324	NFATC3;ENSG00000072736.14;protein_coding,SNORA48;ENSG00000212445.1;snoRNA	hypo	unmutCLL_NBCB	0.71597	1	0.839873	0.9714
chr16	68265574	68265655	genebody,promoter	chr16:68259871-68263048,chr16:68263013-68272005	ESRP2;ENSG00000103067.7;protein_coding,RP11-96D1.11;ENSG00000262160.1;antisense	hypo	mutCLL_MBC	0.58525	0.998167	0.71934	0.97911
chr16	68285389	68285538	genebody	chr16:68279206-68294961	PLA2G15;ENSG00000103066.8;protein_coding	hypo	unmutCLL_NBCB	0.72233	0.9964	0.889125	0.98825
chr16	68392905	68392998	genebody	chr16:68392230-68482591	SMPD3;ENSG00000103056.7;protein_coding	hypo	unmutCLL_NBCB	0.63826	0.98089	0.786367	0.955
chr16	68650038	68650103	intergenic	NA:NA-NA	NA	hypo	unmutCLL_NBCB	0.68241	0.99278	0.884576	0.925667
chr16	69520760	69520878	intergenic	NA:NA-NA	NA	hypo	unmutCLL_NBCB	0.58453	0.99467	0.811023	0.912111
chr16	69614681	69614816	genebody	chr16:69598996-69738569	NFAT5;ENSG00000102908.16;protein_coding	hypo	unmutCLL_NBCB	0.66592	0.99605	0.963383	0.999556
chr16	69641977	69642149	genebody	chr16:69598996-69738569	NFAT5;ENSG00000102908.16;protein_coding	hypo	unmutCLL_NBCB	0.36814	0.999	0.860618	0.995667
chr16	702647	702687	genebody,promoter	chr16:698472-699200,chr16:699310-717833	AL022341.3;ENSG00000228201.1;antisense,WDR90;ENSG00000161996.13;protein_coding	hypo	unmutCLL_NBCB	0.69727	0.95578	0.743667	0.861333
chr16	70318067	70318126	genebody	chr16:70286197-70323446	AARS;ENSG00000090861.11;protein_coding	hypo	unmutCLL_NBCB	0.70053	1	0.881682	0.999
chr16	70449779	70449834	genebody	chr16:70413337-70473140	ST3GAL2;ENSG00000157350.8;protein_coding	hypo	unmutCLL_NBCB	0.71905	1	0.929042	1
chr16	70764043	70764064	genebody	chr16:70721341-70835064	VAC14;ENSG00000103043.10;protein_coding	hypo	unmutCLL_NBCB	0.5678	0.99244	0.878773	0.980167
chr16	70772269	70772547	genebody	chr16:70721341-70835064	VAC14;ENSG00000103043.10;protein_coding	hypo	unmutCLL_NBCB	0.60231	0.96138	0.823526	0.989167
chr16	71435430	71435556	intergenic	NA:NA-NA	NA	hypo	unmutCLL_NBCB	0.69453	0.95911	0.825455	0.908
chr16	73039543	73039604	genebody	chr16:72816783-73093597	ZFHX3;ENSG00000140836.10;protein_coding	hypo	unmutCLL_NBCB	0.6938	0.99922	0.672178	0.938067
chr16	73039556	73039580	genebody	chr16:72816783-73093597	ZFHX3;ENSG00000140836.10;protein_coding	hypo	mutCLL_MBC	0.61565	0.999833	0.4607	0.91822
chr16	73403316	73403352	intergenic	NA:NA-NA	NA	hypo	unmutCLL_NBCB	0.63713	0.98644	0.9476	0.957167
chr16	74619340	74619430	genebody	chr16:74485855-74641012	GLG1;ENSG00000090863.7;protein_coding	hypo	unmutCLL_NBCB	0.50903	0.98578	0.931455	0.982833
chr16	74624957	74625011	genebody	chr16:74485855-74641012	GLG1;ENSG00000090863.7;protein_coding	hypo	mutCLL_MBC,unmutCLL_NBCB	0.1729	0.98622	0.44377	0.96211
chr16	7703688	7703700	genebody	chr16:6069094-7763340	RBFOX1;ENSG00000078328.15;protein_coding	hypo	unmutCLL_NBCB	0.67786	0.95933	0.8625	0.965
chr16	77711733	77711793	intergenic	NA:NA-NA	NA	hypo	unmutCLL_NBCB	0.72071	0.99211	0.950136	0.991167
chr16	77918559	77918600	genebody	chr16:77822426-78014004	VAT1L;ENSG00000171724.2;protein_coding	hypo	unmutCLL_NBCB	0.5591	0.989	0.856909	0.999333
chr16	78601730	78601827	genebody	chr16:78133309-79246564	WWOX;ENSG00000186153.12;protein_coding	hypo	unmutCLL_NBCB	0.39577	0.9935	0.564121	0.925
chr16	78601765	78601827	genebody	chr16:78133309-79246564	WWOX;ENSG00000186153.12;protein_coding	hypo	mutCLL_MBC	0.26175	0.993167	0.49233	0.90933
chr16	79434634	79434707	intergenic	NA:NA-NA	NA	hypo	unmutCLL_NBCB	0.648	0.947	0.836045	0.927167
chr16	79874113	79874153	intergenic	NA:NA-NA	NA	hypo	unmutCLL_NBCB	0.66509	0.98444	0.796125	0.955
chr16	80706978	80707130	genebody	chr16:80631802-80838226	CDYL2;ENSG00000166446.10;protein_coding	hypo	mutCLL_MBC	0.42475	0.993	0.4283	0.90789
chr16	81346660	81346735	promoter	chr16:81344335-81347028,chr16:81348556-81424489	GAN;ENSG00000261609.3;protein_coding,RP11-55K13.1;ENSG00000260495.1;antisense	hypo	mutCLL_MBC,unmutCLL_NBCB	0.39328	0.99744	0.56986	0.97356
chr16	81506777	81506817	genebody	chr16:81478774-81745367	CMIP;ENSG00000153815.12;protein_coding	hypo	unmutCLL_NBCB	0.64276	0.99989	0.781333	0.996
chr16	81533397	81533425	genebody	chr16:81478774-81745367	CMIP;ENSG00000153815.12;protein_coding	hypo	mutCLL_MBC	0.23105	0.990833	0.72345	0.98656
chr16	81533397	81533535	genebody	chr16:81478774-81745367	CMIP;ENSG00000153815.12;protein_coding	hypo	unmutCLL_NBCB	0.41651	0.99694	0.741345	0.970467
chr16	81585504	81585565	genebody	chr16:81478774-81745367	CMIP;ENSG00000153815.12;protein_coding	hypo	unmutCLL_NBCB	0.56805	0.96278	0.918773	0.916667
chr16	81684835	81685089	genebody	chr16:81478774-81745367	CMIP;ENSG00000153815.12;protein_coding	hypo	unmutCLL_NBCB	0.47157	0.99522	0.866007	0.992077
chr16	81685946	81686025	genebody	chr16:81478774-81745367	CMIP;ENSG00000153815.12;protein_coding	hypo	mutCLL_MBC,unmutCLL_NBCB	0.061057	0.99083	0.61961	0.99067
chr16	81727282	81727349	genebody	chr16:81478774-81745367	CMIP;ENSG00000153815.12;protein_coding	hypo	unmutCLL_NBCB	0.59157	1	0.796814	0.979667
chr16	81741549	81741590	genebody	chr16:81478774-81745367	CMIP;ENSG00000153815.12;protein_coding	hypo	unmutCLL_NBCB	0.6445	1	0.905	0.9225
chr16	83619787	83619827	genebody	chr16:82660407-83830204	CDH13;ENSG00000140945.11;protein_coding	hypo	unmutCLL_NBCB	0.7129	0.99422	0.89185	0.9375
chr16	83994788	83994795	genebody	chr16:83981886-83999937	OSGIN1;ENSG00000140961.8;protein_coding	hypo	unmutCLL_NBCB	0.70473	0.99178	0.775273	0.984
chr16	84162773	84162812	genebody	chr16:84155885-84178797	HSDL1;ENSG00000103160.7;protein_coding	hypo	unmutCLL_NBCB	0.72903	0.999	0.8214	0.965167
chr16	84385568	84385698	intergenic	NA:NA-NA	NA	hypo	unmutCLL_NBCB	0.71961	0.99642	0.914455	0.959111
chr16	84443535	84443595	genebody	chr16:84402132-84497793	ATP2C2;ENSG00000064270.8;protein_coding	hypo	unmutCLL_NBCB	0.72074	0.98744	0.897545	0.907833
chr16	84582681	84582746	genebody	chr16:84511680-84587639	TLDC1;ENSG00000140950.11;protein_coding	hypo	unmutCLL_NBCB	0.54402	0.99767	0.836364	0.947833
chr16	84608766	84608831	genebody	chr16:84599199-84651683	COTL1;ENSG00000103187.6;protein_coding	hypo	mutCLL_MBC	0.8033	0.988667	0.66622	0.95811
chr16	84646032	84646074	genebody	chr16:84599199-84651683	COTL1;ENSG00000103187.6;protein_coding	hypo	unmutCLL_NBCB	0.67957	0.997	0.74975	0.932333
chr16	84771524	84771571	genebody	chr16:84733583-84813528	USP10;ENSG00000103194.11;protein_coding	hypo	unmutCLL_NBCB	0.72443	0.99233	0.839773	0.9
chr16	85027656	85027742	genebody	chr16:85007786-85045141	ZDHHC7;ENSG00000153786.8;protein_coding	hypo	unmutCLL_NBCB	0.53264	0.99525	0.820727	0.961667
chr16	85028951	85029087	genebody	chr16:85007786-85045141	ZDHHC7;ENSG00000153786.8;protein_coding	hypo	mutCLL_MBC	0.191875	1	0.60745	0.98667
chr16	85028951	85029099	genebody	chr16:85007786-85045141	ZDHHC7;ENSG00000153786.8;protein_coding	hypo	unmutCLL_NBCB	0.26768	1	0.6092	0.986667
chr16	85284990	85285023	intergenic	NA:NA-NA	NA	hypo	unmutCLL_NBCB	0.64787	0.96311	0.903864	0.959333
chr16	85310188	85310209	intergenic	NA:NA-NA	NA	hypo	unmutCLL_NBCB	0.72441	0.99778	0.719136	0.921167
chr16	85351473	85351513	intergenic	NA:NA-NA	NA	hypo	unmutCLL_NBCB	0.67364	0.95822	0.940833	0.961
chr16	85576284	85576318	intergenic	NA:NA-NA	NA	hypo	unmutCLL_NBCB	0.4623	0.96578	0.681182	0.7975
chr16	85600921	85601032	intergenic	NA:NA-NA	NA	hypo	mutCLL_MBC	0.537	0.989167	0.60515	0.89733
chr16	85673485	85673512	genebody	chr16:85645014-85709810	GSE1;ENSG00000131149.13;protein_coding	hypo	unmutCLL_NBCB	0.72215	0.98875	0.886015	0.977889
chr16	85684290	85684434	genebody	chr16:85645014-85709810	GSE1;ENSG00000131149.13;protein_coding	hypo	unmutCLL_NBCB	0.48026	0.988	0.850323	0.977233
chr16	85770323	85770424	genebody	chr16:85723689-85784735	C16orf74;ENSG00000154102.6;protein_coding	hypo	mutCLL_MBC	0.627067	0.993444	0.70369	0.98567
chr16	85770379	85770424	genebody	chr16:85723689-85784735	C16orf74;ENSG00000154102.6;protein_coding	hypo	unmutCLL_NBCB	0.5752	0.99411	0.748455	0.989833
chr16	85770885	85771024	genebody	chr16:85723689-85784735	C16orf74;ENSG00000154102.6;protein_coding	hypo	unmutCLL_NBCB	0.73568	0.99822	0.839227	0.994
chr16	85954121	85954138	genebody	chr16:85932408-85956215	IRF8;ENSG00000140968.6;protein_coding	hypo	unmutCLL_NBCB	0.67385	1	0.834091	0.990333
chr16	85964756	85964970	intergenic	NA:NA-NA	NA	hypo	unmutCLL_NBCB	0.59826	0.99622	0.759697	0.997167
chr16	85966904	85966945	intergenic	NA:NA-NA	NA	hypo	unmutCLL_NBCB	0.39346	0.99989	0.697045	0.993833
chr16	85986912	85986934	intergenic	NA:NA-NA	NA	hypo	unmutCLL_NBCB	0.54493	0.99822	0.775438	0.951833
chr16	86051079	86051216	intergenic	NA:NA-NA	NA	hypo	mutCLL_MBC	0.11578	0.979	0.21627	0.9414
chr16	864226	864295	intergenic	NA:NA-NA	NA	hypo	unmutCLL_NBCB	0.58488	0.95633	0.81153	0.98675
chr16	86808705	86808775	intergenic	NA:NA-NA	NA	hypo	unmutCLL_NBCB	0.6803	0.99467	0.8279	0.891
chr16	87413977	87414049	genebody,promoter	chr16:87360592-87425748,chr16:87417600-87438385	FBXO31;ENSG00000103264.11;protein_coding,MAP1LC3B;ENSG00000140941.8;protein_coding	hypo	unmutCLL_NBCB	0.3966	0.99289	0.844364	0.969833
chr16	87828245	87828322	genebody	chr16:87813739-87840082	RP4-536B24.3;ENSG00000260177.1;lincRNA	hypo	unmutCLL_NBCB	0.72532	0.9916	0.885848	0.96675
chr16	87871225	87871318	genebody,promoter	chr16:87863628-87903094,chr16:87870137-87871269	RP4-536B24.2;ENSG00000260466.1;antisense,SLC7A5;ENSG00000103257.4;protein_coding	hypo	unmutCLL_NBCB	0.72466	0.9815	0.849803	0.955667
chr16	87888303	87888347	genebody	chr16:87863628-87903094	SLC7A5;ENSG00000103257.4;protein_coding	hypo	unmutCLL_NBCB	0.66316	0.99567	0.9325	0.979
chr16	879270	879292	intergenic	NA:NA-NA	NA	hypo	unmutCLL_NBCB	0.73333	0.99789	0.790545	0.925833
chr16	88019303	88019327	genebody	chr16:87982849-88110924	BANP;ENSG00000172530.15;protein_coding	hypo	unmutCLL_NBCB	0.10523	0.97378	0.466333	0.996833
chr16	88112054	88112138	intergenic	NA:NA-NA	NA	hypo	unmutCLL_NBCB	0.54242	0.98767	0.7622	0.965333
chr16	88331089	88331134	genebody	chr16:88268390-88336117	LA16c-444G7.1;ENSG00000261273.1;lincRNA	hypo	unmutCLL_NBCB	0.6445	0.96692	0.771621	0.908667
chr16	88535605	88535622	genebody,promoter	chr16:88519724-88603424,chr16:88535325-88535439	MIR5189;ENSG00000263456.1;miRNA,ZFPM1;ENSG00000179588.4;protein_coding	hypo	mutCLL_MBC	0.48925	0.982333	0.66615	0.99344
chr16	88535737	88535802	genebody,promoter	chr16:88519724-88603424,chr16:88535325-88535439	MIR5189;ENSG00000263456.1;miRNA,ZFPM1;ENSG00000179588.4;protein_coding	hypo	mutCLL_MBC,unmutCLL_NBCB	0.11673	0.98189	0.205	0.92278
chr16	88549962	88550033	genebody	chr16:88519724-88603424	ZFPM1;ENSG00000179588.4;protein_coding	hypo	unmutCLL_NBCB	0.6373	0.98733	0.731591	0.9345
chr16	88593344	88593455	genebody	chr16:88519724-88603424,chr16:88579367-88597461	RP11-21B21.4;ENSG00000261744.1;antisense,ZFPM1;ENSG00000179588.4;protein_coding	hypo	unmutCLL_NBCB	0.72489	0.98644	0.783636	0.86
chr16	88712804	88712843	genebody	chr16:88709690-88717560	CYBA;ENSG00000051523.6;protein_coding	hypo	unmutCLL_NBCB	0.40035	0.93111	0.534227	0.7995
chr16	88722371	88722723	genebody,promoter	chr16:88709690-88717560,chr16:88718342-88729569	CYBA;ENSG00000051523.6;protein_coding,MVD;ENSG00000167508.6;protein_coding	hypo	unmutCLL_NBCB	0.69103	0.99187	0.888303	0.974905
chr16	88760482	88760534	promoter	chr16:88762908-88765018	RP5-1142A6.5;ENSG00000259813.1;antisense	hypo	unmutCLL_NBCB	0.72318	0.99487	0.851618	0.912417
chr16	88784766	88784812	genebody,promoter	chr16:88781750-88851619,chr16:88782685-88782745,chr16:88785022-88786867	MIR4722;ENSG00000265672.1;miRNA,PIEZO1;ENSG00000103335.15;protein_coding,RP5-1142A6.9;ENSG00000260121.1;antisense	hypo	unmutCLL_NBCB	0.49573	0.98175	0.883121	0.948444
chr16	88805816	88805917	genebody,promoter	chr16:88781750-88851619,chr16:88797587-88807826,chr16:88808038-88808775,chr16:88809174-88812156	PIEZO1;ENSG00000103335.15;protein_coding,RP5-1142A6.2;ENSG00000224888.3;antisense,RP5-1142A6.7;ENSG00000260617.1;antisense,RP5-1142A6.8;ENSG00000182376.2;antisense	hypo	mutCLL_MBC,unmutCLL_NBCB	0.55274	0.99933	0.67433	0.97447
chr16	88827139	88827272	genebody	chr16:88781750-88851619	PIEZO1;ENSG00000103335.15;protein_coding	hypo	mutCLL_MBC,unmutCLL_NBCB	0.32845	0.99933	0.50978	0.935
chr16	88926041	88926079	genebody,promoter	chr16:88880141-88923378,chr16:88922627-88929094	GALNS;ENSG00000141012.8;protein_coding,TRAPPC2L;ENSG00000167515.6;protein_coding	hypo	unmutCLL_NBCB	0.1389	0.99789	0.308429	0.971167
chr16	88944606	88944630	genebody,promoter	chr16:88941265-89043612,chr16:88947445-88953544	CBFA2T3;ENSG00000129993.10;protein_coding,RP11-830F9.5;ENSG00000259881.1;antisense	hypo	mutCLL_MBC	0.353444	0.987167	0.65587	0.94956
chr16	88950139	88950209	genebody	chr16:88941265-89043612,chr16:88947445-88953544	CBFA2T3;ENSG00000129993.10;protein_coding,RP11-830F9.5;ENSG00000259881.1;antisense	hypo	mutCLL_MBC,unmutCLL_NBCB	0.31523	0.99481	0.57473	0.983
chr16	88951240	88951358	genebody	chr16:88941265-89043612,chr16:88947445-88953544	CBFA2T3;ENSG00000129993.10;protein_coding,RP11-830F9.5;ENSG00000259881.1;antisense	hypo	unmutCLL_NBCB	0.63401	0.986	0.894778	0.997222
chr16	88961478	88961563	genebody	chr16:88941265-89043612	CBFA2T3;ENSG00000129993.10;protein_coding	hypo	unmutCLL_NBCB	0.27454	0.97767	0.380174	0.923
chr16	88961619	88961908	genebody	chr16:88941265-89043612	CBFA2T3;ENSG00000129993.10;protein_coding	hypo	unmutCLL_NBCB	0.53354	0.97546	0.565412	0.952923
chr16	88980250	88980406	genebody	chr16:88941265-89043612	CBFA2T3;ENSG00000129993.10;protein_coding	hypo	unmutCLL_NBCB	0.2942	0.94222	0.258818	0.845
chr16	88984277	88984360	genebody	chr16:88941265-89043612	CBFA2T3;ENSG00000129993.10;protein_coding	hypo	mutCLL_MBC	0.596343	0.996944	0.69123	0.96156
chr16	88990242	88990272	genebody	chr16:88941265-89043612	CBFA2T3;ENSG00000129993.10;protein_coding	hypo	mutCLL_MBC	0.505556	0.9335	0.55455	0.86233
chr16	88990242	88990392	genebody	chr16:88941265-89043612	CBFA2T3;ENSG00000129993.10;protein_coding	hypo	unmutCLL_NBCB	0.62568	0.953	0.617273	0.851583
chr16	88994559	88994711	genebody	chr16:88941265-89043612	CBFA2T3;ENSG00000129993.10;protein_coding	hypo	unmutCLL_NBCB	0.72368	0.99589	0.757823	0.956667
chr16	88994682	88994711	genebody	chr16:88941265-89043612	CBFA2T3;ENSG00000129993.10;protein_coding	hypo	mutCLL_MBC	0.6912	0.996333	0.67012	0.95222
chr16	89004248	89004333	genebody,promoter	chr16:88941265-89043612,chr16:89003186-89006059,chr16:89006196-89017932	CBFA2T3;ENSG00000129993.10;protein_coding,RP11-830F9.6;ENSG00000205018.2;protein_coding,RP11-830F9.7;ENSG00000261226.1;sense_intronic	hypo	mutCLL_MBC	0.741267	0.976111	0.51086	0.94867
chr16	89010481	89010546	genebody,promoter	chr16:88941265-89043612,chr16:89003186-89006059,chr16:89006196-89017932	CBFA2T3;ENSG00000129993.10;protein_coding,RP11-830F9.6;ENSG00000205018.2;protein_coding,RP11-830F9.7;ENSG00000261226.1;sense_intronic	hypo	mutCLL_MBC,unmutCLL_NBCB	0.35555	0.92167	0.63269	0.92487
chr16	89055144	89055186	genebody	chr16:89050439-89061777	CTD-2555A7.1;ENSG00000259989.1;lincRNA	hypo	unmutCLL_NBCB	0.63197	0.99344	0.84555	0.985833
chr16	89056935	89057209	genebody	chr16:89050439-89061777	CTD-2555A7.1;ENSG00000259989.1;lincRNA	hypo	unmutCLL_NBCB	0.73277	0.98622	0.845676	0.9864
chr16	89167145	89167233	genebody	chr16:89154782-89222254	ACSF3;ENSG00000176715.11;protein_coding	hypo	unmutCLL_NBCB	0.60678	0.99117	0.928517	0.987905
chr16	89183381	89183547	genebody,promoter	chr16:89154782-89222254,chr16:89179582-89181687	ACSF3;ENSG00000176715.11;protein_coding,CTD-2555A7.3;ENSG00000261546.1;antisense	hypo	unmutCLL_NBCB	0.6447	0.99779	0.915355	0.982
chr16	89198702	89198789	genebody	chr16:89154782-89222254	ACSF3;ENSG00000176715.11;protein_coding	hypo	unmutCLL_NBCB	0.71418	0.99158	0.729212	0.989556
chr16	89513899	89514079	genebody	chr16:89334037-89556969	ANKRD11;ENSG00000167522.10;protein_coding	hypo	unmutCLL_NBCB	0.744	0.99822	0.811	0.9926
chr16	89513929	89514003	genebody	chr16:89334037-89556969	ANKRD11;ENSG00000167522.10;protein_coding	hypo	mutCLL_MBC	0.8785	0.999333	0.69058	0.99233
chr16	89544993	89545050	genebody	chr16:89334037-89556969	ANKRD11;ENSG00000167522.10;protein_coding	hypo	mutCLL_MBC	0.0440667	0.999444	0.27728	0.97392
chr16	89549972	89550149	genebody	chr16:89334037-89556969	ANKRD11;ENSG00000167522.10;protein_coding	hypo	unmutCLL_NBCB	0.68998	0.99481	0.814778	0.983833
chr16	89615014	89615031	genebody	chr16:89557324-89624176	SPG7;ENSG00000197912.9;protein_coding	hypo	mutCLL_MBC,unmutCLL_NBCB	0.49993	0.99667	0.67673	0.97289
chr16	89616886	89617007	genebody	chr16:89557324-89624176	SPG7;ENSG00000197912.9;protein_coding	hypo	unmutCLL_NBCB	0.67338	0.99372	0.946855	0.972133
chr16	89672548	89672591	intergenic	NA:NA-NA	NA	hypo	unmutCLL_NBCB	0.67567	0.94844	0.832182	0.9245
chr16	89674873	89674983	promoter	chr16:89679715-89704839	DPEP1;ENSG00000015413.5;protein_coding	hypo	unmutCLL_NBCB	0.72383	0.97978	0.714136	0.8565
chr16	89680938	89680997	promoter	chr16:89679715-89704839	DPEP1;ENSG00000015413.5;protein_coding	hypo	unmutCLL_NBCB	0.67333	0.98844	0.748409	0.918167
chr16	89826306	89826371	genebody	chr16:89803956-89883065	FANCA;ENSG00000187741.10;protein_coding	hypo	mutCLL_MBC,unmutCLL_NBCB	0.19762	0.997	0.50991	0.93911
chr16	89938803	89938896	promoter	chr16:89939999-89977792	TCF25;ENSG00000141002.14;protein_coding	hypo	unmutCLL_NBCB	0.71515	0.97811	0.854864	0.931
chr16	89980001	89980066	genebody,promoter	chr16:89972564-89984641,chr16:89978526-89987385	MC1R;ENSG00000258839.2;protein_coding,RP11-566K11.7;ENSG00000267048.1;processed_transcript	hypo	unmutCLL_NBCB	0.51778	0.95478	0.629409	0.859167
chr16	90022200	90022217	genebody	chr16:90014332-90034468	DEF8;ENSG00000140995.12;protein_coding	hypo	mutCLL_MBC,unmutCLL_NBCB	0.55236	0.97658	0.58081	0.91342
chr16	90026093	90026211	genebody	chr16:90014332-90034468	DEF8;ENSG00000140995.12;protein_coding	hypo	unmutCLL_NBCB	0.74311	0.99648	0.791375	0.985
chr16	90034283	90034299	genebody,promoter	chr16:90014332-90034468,chr16:90036198-90038952,chr16:90038993-90068569	AFG3L1P;ENSG00000223959.4;pseudogene,DEF8;ENSG00000140995.12;protein_coding,RP11-566K11.5;ENSG00000261317.1;antisense	hypo	unmutCLL_NBCB	0.70173	0.99144	0.905727	0.986833
chr16	90050383	90050441	genebody	chr16:90038993-90068569	AFG3L1P;ENSG00000223959.4;pseudogene	hypo	unmutCLL_NBCB	0.55	0.99042	0.928	0.972333
chr16	90052883	90053012	genebody	chr16:90038993-90068569	AFG3L1P;ENSG00000223959.4;pseudogene	hypo	mutCLL_MBC,unmutCLL_NBCB	0.38561	0.99039	0.62517	0.99533
chr16	90063393	90063530	genebody	chr16:90038993-90068569	AFG3L1P;ENSG00000223959.4;pseudogene	hypo	unmutCLL_NBCB	0.68075	0.99783	0.851982	0.9864
chr16	9020935	9021102	genebody	chr16:8985950-9058371	USP7;ENSG00000187555.10;protein_coding	hypo	unmutCLL_NBCB	0.73413	0.99241	0.913182	0.942042
chr16	9225538	9225673	intergenic	NA:NA-NA	NA	hypo	unmutCLL_NBCB	0.65509	0.98927	0.697659	0.959917
chr16	9906259	9906351	genebody	chr16:9852375-10276611	GRIN2A;ENSG00000183454.9;protein_coding	hypo	unmutCLL_NBCB	0.70427	0.97356	0.864292	0.916
chr16	9970349	9970476	genebody	chr16:9852375-10276611	GRIN2A;ENSG00000183454.9;protein_coding	hypo	unmutCLL_NBCB	0.72333	0.99933	0.887909	0.977667
chr17	11054232	11054278	intergenic	NA:NA-NA	NA	hypo	unmutCLL_NBCB	0.62716	0.98167	0.817571	0.828833
chr17	1123305	1123476	genebody	chr17:906757-1132315	ABR;ENSG00000159842.10;protein_coding	hypo	unmutCLL_NBCB	0.484	0.99669	0.732064	0.976667
chr17	11477453	11477571	intergenic	NA:NA-NA	NA	hypo	unmutCLL_NBCB	0.66549	0.96578	0.87	0.967167
chr17	11640769	11640839	genebody	chr17:11501747-11873065	DNAH9;ENSG00000007174.13;protein_coding	hypo	unmutCLL_NBCB	0.70804	0.97222	0.803273	0.934
chr17	11686890	11687030	genebody	chr17:11501747-11873065	DNAH9;ENSG00000007174.13;protein_coding	hypo	unmutCLL_NBCB	0.71568	0.97911	0.82995	0.965833
chr17	1173257	1173288	promoter	chr17:1173852-1174754	BHLHA9;ENSG00000205899.3;protein_coding	hypo	unmutCLL_NBCB	0.6104	0.99078	0.883455	0.896833
chr17	12862950	12863015	genebody	chr17:12692855-12894960	ARHGAP44;ENSG00000006740.12;protein_coding	hypo	unmutCLL_NBCB	0.6093	0.99475	0.567	0.975556
chr17	1366219	1366225	promoter	chr17:1323982-1366456	CRK;ENSG00000167193.7;protein_coding	hypo	unmutCLL_NBCB	0.16651	0.95489	0.316214	0.951667
chr17	16978849	16978886	genebody,promoter	chr17:16945858-17120993,chr17:16979351-16981066	MPRIP-AS1;ENSG00000225442.2;antisense,MPRIP;ENSG00000133030.15;protein_coding	hypo	unmutCLL_NBCB	0.59977	0.98	0.921625	0.9905
chr17	17186874	17186891	promoter	chr17:17150140-17184607	COPS3;ENSG00000141030.8;protein_coding	hypo	unmutCLL_NBCB	0.67663	0.98967	0.866682	0.982
chr17	17647822	17647959	genebody	chr17:17584786-17714767	RAI1;ENSG00000108557.13;protein_coding	hypo	unmutCLL_NBCB	0.73345	0.98624	0.827955	0.953667
chr17	17660203	17660287	genebody	chr17:17584786-17714767	RAI1;ENSG00000108557.13;protein_coding	hypo	unmutCLL_NBCB	0.64808	0.92208	0.852273	0.968778
chr17	17677757	17677963	genebody,promoter	chr17:17584786-17714767,chr17:17662467-17674135,chr17:17681094-17682408	RAI1-AS1;ENSG00000237328.1;antisense,RAI1;ENSG00000108557.13;protein_coding,RP1-253P7.1;ENSG00000264167.1;sense_intronic	hypo	unmutCLL_NBCB	0.65164	0.98748	0.854787	0.980833
chr17	17677774	17677833	genebody,promoter	chr17:17584786-17714767,chr17:17662467-17674135,chr17:17681094-17682408	RAI1-AS1;ENSG00000237328.1;antisense,RAI1;ENSG00000108557.13;protein_coding,RP1-253P7.1;ENSG00000264167.1;sense_intronic	hypo	mutCLL_MBC	0.38815	0.987333	0.68961	0.95033
chr17	17735970	17736158	genebody	chr17:17713712-17740325	SREBF1;ENSG00000072310.12;protein_coding	hypo	unmutCLL_NBCB	0.59426	0.99472	0.78038	0.950476
chr17	17750594	17750634	genebody	chr17:17746827-17875736	TOM1L2;ENSG00000175662.13;protein_coding	hypo	unmutCLL_NBCB	0.57559	0.972	0.808111	0.979333
chr17	17926163	17926254	genebody	chr17:17880722-17942523	ATPAF2;ENSG00000171953.11;protein_coding	hypo	mutCLL_MBC	0.815883	0.9955	0.74774	0.99862
chr17	18157813	18157827	genebody	chr17:18148149-18162230	FLII;ENSG00000177731.11;protein_coding	hypo	unmutCLL_NBCB	0.64099	0.98678	0.717955	0.916333
chr17	18255693	18255705	genebody	chr17:18231186-18266856	SHMT1;ENSG00000176974.13;protein_coding	hypo	mutCLL_MBC	0.702056	1	0.60958	0.99244
chr17	18280314	18280413	promoter	chr17:18280975-18292961	EVPLL;ENSG00000214860.4;protein_coding	hypo	unmutCLL_NBCB	0.72253	0.99622	0.851667	0.9575
chr17	19162780	19162875	genebody	chr17:19118927-19240028	EPN2;ENSG00000072134.11;protein_coding	hypo	unmutCLL_NBCB	0.71015	0.99589	0.85955	0.929417
chr17	19203331	19203419	genebody	chr17:19118927-19240028,chr17:19199908-19209574	EPN2-AS1;ENSG00000235397.1;antisense,EPN2;ENSG00000072134.11;protein_coding	hypo	mutCLL_MBC	0.43765	0.999333	0.59753	0.85944
chr17	19211890	19211958	genebody,promoter	chr17:19118927-19240028,chr17:19199908-19209574	EPN2-AS1;ENSG00000235397.1;antisense,EPN2;ENSG00000072134.11;protein_coding	hypo	unmutCLL_NBCB	0.72128	0.99973	0.850826	0.970667
chr17	19617257	19617299	genebody	chr17:19581600-19622292	SLC47A2;ENSG00000180638.13;protein_coding	hypo	unmutCLL_NBCB	0.71013	0.987	0.744318	0.891167
chr17	20914568	20914684	genebody	chr17:20902909-20947073	USP22;ENSG00000124422.7;protein_coding	hypo	unmutCLL_NBCB	0.72567	0.99522	0.673091	0.9535
chr17	21198739	21198901	genebody	chr17:21187983-21218552	MAP2K3;ENSG00000034152.14;protein_coding	hypo	unmutCLL_NBCB	0.4839	0.81144	0.583667	0.818533
chr17	21255877	21256006	intergenic	NA:NA-NA	NA	hypo	unmutCLL_NBCB	0.6533	0.98544	0.706389	0.9135
chr17	21340001	21340029	intergenic	NA:NA-NA	NA	hypo	unmutCLL_NBCB	0.45896	0.92722	0.669636	0.9575
chr17	2346212	2346442	genebody	chr17:2308855-2415185	METTL16;ENSG00000127804.8;protein_coding	hypo	unmutCLL_NBCB	0.58682	0.99897	0.842423	0.987667
chr17	26980550	26980685	genebody	chr17:26975373-26989207	SDF2;ENSG00000132581.5;protein_coding	hypo	unmutCLL_NBCB	0.68135	0.99494	0.752473	0.948467
chr17	27029535	27029584	genebody	chr17:26989108-27029697	SUPT6H;ENSG00000109111.10;protein_coding	hypo	unmutCLL_NBCB	0.33156	0.98933	0.712591	0.990917
chr17	27029567	27029584	genebody	chr17:26989108-27029697	SUPT6H;ENSG00000109111.10;protein_coding	hypo	mutCLL_MBC	0.2439	0.997167	0.555	0.94067
chr17	27058278	27058363	genebody,promoter	chr17:27051365-27054953,chr17:27052914-27070473	NEK8;ENSG00000160602.9;protein_coding,TLCD1;ENSG00000160606.6;protein_coding	hypo	mutCLL_MBC,unmutCLL_NBCB	0.23868	0.9901	0.46836	0.95119
chr17	27228104	27228144	promoter	chr17:27206352-27224697,chr17:27224798-27230089	DHRS13;ENSG00000167536.9;protein_coding,FLOT2;ENSG00000132589.11;protein_coding	hypo	mutCLL_MBC,unmutCLL_NBCB	0.55693	1	0.61478	0.91058
chr17	27293031	27293074	genebody	chr17:27277530-27384234,chr17:27281918-27333458	PIPOX;ENSG00000179761.7;protein_coding,SEZ6;ENSG00000063015.15;protein_coding	hypo	unmutCLL_NBCB	0.63775	0.95267	0.840944	0.937333
chr17	27934836	27934927	genebody	chr17:27887564-28034108,chr17:27916786-27941779	ANKRD13B;ENSG00000198720.8;protein_coding,RP11-68I3.2;ENSG00000264031.1;antisense	hypo	mutCLL_MBC	0.0293571	0.988952	0.281	0.97104
chr17	27934836	27935056	genebody	chr17:27887564-28034108,chr17:27916786-27941779	ANKRD13B;ENSG00000198720.8;protein_coding,RP11-68I3.2;ENSG00000264031.1;antisense	hypo	unmutCLL_NBCB	0.049018	0.992	0.318891	0.951533
chr17	27934989	27935056	genebody	chr17:27887564-28034108,chr17:27916786-27941779	ANKRD13B;ENSG00000198720.8;protein_coding,RP11-68I3.2;ENSG00000264031.1;antisense	hypo	mutCLL_MBC	0.095	0.999667	0.50284	0.91244
chr17	28069043	28069112	genebody	chr17:27952955-28257294	SSH2;ENSG00000141298.13;protein_coding	hypo	unmutCLL_NBCB	0.6741	1	0.948727	0.9955
chr17	28534799	28534857	genebody	chr17:28521336-28563020	SLC6A4;ENSG00000108576.5;protein_coding	hypo	unmutCLL_NBCB	0.59805	0.95633	0.734067	0.907444
chr17	28549779	28549820	genebody	chr17:28521336-28563020	SLC6A4;ENSG00000108576.5;protein_coding	hypo	unmutCLL_NBCB	0.69687	0.98878	0.896667	0.977
chr17	28551327	28551379	genebody	chr17:28521336-28563020	SLC6A4;ENSG00000108576.5;protein_coding	hypo	unmutCLL_NBCB	0.54572	0.99842	0.916818	0.994667
chr17	2892871	2892921	genebody	chr17:2680349-2941033	RAP1GAP2;ENSG00000132359.9;protein_coding	hypo	mutCLL_MBC	0.9448	1	0.50877	0.93713
chr17	29841197	29841385	genebody,promoter	chr17:29718641-29865236,chr17:29845449-29845745	RAB11FIP4;ENSG00000131242.11;protein_coding,RN7SL45P;ENSG00000264862.1;misc_RNA	hypo	unmutCLL_NBCB	0.6822	0.99325	0.74799	0.955095
chr17	30695882	30695916	genebody	chr17:30677135-30708905	ZNF207;ENSG00000010244.12;protein_coding	hypo	mutCLL_MBC	0.518111	1	0.65767	0.99922
chr17	31618923	31618953	genebody	chr17:31340104-32501983	ASIC2;ENSG00000108684.10;protein_coding	hyper	mutCLL_MBC	0.2709	0.03425	0.37389	0.096133
chr17	32404351	32404421	genebody	chr17:31340104-32501983	ASIC2;ENSG00000108684.10;protein_coding	hypo	unmutCLL_NBCB	0.68645	0.97989	0.879682	0.935833
chr17	33459925	33460060	genebody	chr17:33455771-33469334	NLE1;ENSG00000073536.13;protein_coding	hypo	unmutCLL_NBCB	0.72689	0.99594	0.858845	0.993333
chr17	33808157	33808186	genebody	chr17:33791267-33864880	SLFN12L;ENSG00000205045.4;protein_coding	hypo	mutCLL_MBC	0.6352	0.969833	0.6053	0.97478
chr17	3432139	3432154	genebody	chr17:3413795-3461289	TRPV3;ENSG00000167723.10;protein_coding	hypo	unmutCLL_NBCB	0.70433	0.95567	0.902909	0.928833
chr17	37047578	37047669	genebody	chr17:37026111-37078023	LASP1;ENSG00000002834.13;protein_coding	hypo	mutCLL_MBC,unmutCLL_NBCB	0.21009	0.963	0.44257	0.921
chr17	37461067	37461169	genebody	chr17:37415383-37558776	FBXL20;ENSG00000108306.7;protein_coding	hypo	mutCLL_MBC,unmutCLL_NBCB	0.62504	0.99973	0.71484	0.99433
chr17	37555115	37555220	genebody,promoter	chr17:37415383-37558776,chr17:37558045-37562486	CTB-131K11.1;ENSG00000266469.1;antisense,FBXL20;ENSG00000108306.7;protein_coding	hypo	unmutCLL_NBCB	0.55088	0.99213	0.770977	0.952667
chr17	38513433	38513528	promoter	chr17:38516906-38520945	CTD-2267D19.3;ENSG00000266208.1;protein_coding	hypo	unmutCLL_NBCB	0.68222	0.99111	0.591545	0.957667
chr17	38700225	38700427	intergenic	NA:NA-NA	NA	hypo	unmutCLL_NBCB	0.61956	0.99856	0.86228	0.9988
chr17	38769155	38769228	intergenic	NA:NA-NA	NA	hypo	mutCLL_MBC,unmutCLL_NBCB	0.33298	0.99908	0.71727	0.99925
chr17	3889373	3889409	intergenic	NA:NA-NA	NA	hypo	mutCLL_MBC,unmutCLL_NBCB	0.18334	0.80589	0.285	0.786
chr17	4003893	4004052	genebody	chr17:3907738-4046314	ZZEF1;ENSG00000074755.10;protein_coding	hypo	unmutCLL_NBCB	0.65354	0.98188	0.909795	0.988182
chr17	4005173	4005218	genebody	chr17:3907738-4046314	ZZEF1;ENSG00000074755.10;protein_coding	hypo	unmutCLL_NBCB	0.41317	0.99944	0.788318	0.883833
chr17	40131183	40131297	genebody	chr17:40128450-40173394	DNAJC7;ENSG00000168259.10;protein_coding	hypo	unmutCLL_NBCB	0.63056	0.99733	0.708182	0.946667
chr17	40444576	40444593	genebody	chr17:40439564-40463961	STAT5A;ENSG00000126561.12;protein_coding	hypo	unmutCLL_NBCB	0.72114	0.97433	0.7115	0.955
chr17	40636174	40636325	genebody	chr17:40610861-40674629	ATP6V0A1;ENSG00000033627.10;protein_coding	hypo	unmutCLL_NBCB	0.05322	0.97987	0.398447	0.984524
chr17	40636233	40636325	genebody	chr17:40610861-40674629	ATP6V0A1;ENSG00000033627.10;protein_coding	hypo	mutCLL_MBC	0.0323	0.98975	0.382	0.98693
chr17	40683710	40683849	promoter	chr17:40688189-40696467,chr17:40688527-40714080	NAGLU;ENSG00000108784.5;protein_coding,RP11-400F19.8;ENSG00000266929.1;processed_transcript	hypo	unmutCLL_NBCB	0.48327	0.84867	0.635227	0.8185
chr17	4081027	4081134	genebody	chr17:4046461-4090605,chr17:4067200-4167274	ANKFY1;ENSG00000185722.12;protein_coding,CYB5D2;ENSG00000167740.5;protein_coding	hypo	unmutCLL_NBCB	0.49884	0.99822	0.834459	0.978867
chr17	41044760	41044793	genebody,promoter	chr17:41026686-41050751,chr17:41043354-41043452	LINC00671;ENSG00000213373.3;lincRNA,RNU6-287P;ENSG00000252039.1;snRNA	hypo	unmutCLL_NBCB	0.72004	0.991	0.835333	0.867333
chr17	43147928	43147945	genebody,promoter	chr17:43128977-43186384,chr17:43148809-43148911	NMT1;ENSG00000136448.7;protein_coding,Y_RNA;ENSG00000200888.1;misc_RNA	hypo	unmutCLL_NBCB	0.60751	0.99533	0.819091	0.925333
chr17	43347749	43347793	genebody	chr17:43340487-43394414	MAP3K14;ENSG00000006062.9;processed_transcript	hypo	mutCLL_MBC	0.083	1	0.51733	0.98544
chr17	45538742	45538830	genebody	chr17:45527933-45569858	MRPL45P2;ENSG00000228782.3;pseudogene	hypo	unmutCLL_NBCB	0.66266	0.99778	0.9665	0.975833
chr17	46084861	46084979	intergenic	NA:NA-NA	NA	hypo	unmutCLL_NBCB	0.67608	0.964	0.884409	0.966
chr17	47512837	47512893	genebody	chr17:47448101-47554350	RP11-81K2.1;ENSG00000262039.1;protein_coding	hypo	unmutCLL_NBCB	0.55524	0.83111	0.846682	0.953
chr17	47827856	47827933	genebody	chr17:47787693-47866542	FAM117A;ENSG00000121104.3;protein_coding	hypo	mutCLL_MBC,unmutCLL_NBCB	0.40087	0.99356	0.60016	0.95056
chr17	47831825	47831960	genebody	chr17:47787693-47866542	FAM117A;ENSG00000121104.3;protein_coding	hypo	unmutCLL_NBCB	0.6891	0.99211	0.821509	0.988933
chr17	48478721	48478767	promoter	chr17:48452419-48474914	LRRC59;ENSG00000108829.9;protein_coding	hypo	mutCLL_MBC	0.736656	0.998	0.65035	0.9946
chr17	48478754	48478767	promoter	chr17:48452419-48474914	LRRC59;ENSG00000108829.9;protein_coding	hypo	unmutCLL_NBCB	0.62178	0.99856	0.6937	0.993
chr17	4872945	4872991	genebody,promoter	chr17:4862520-4871167,chr17:4871286-4890960,chr17:4871289-4872117,chr17:4876145-4877976	CAMTA2;ENSG00000108509.16;protein_coding,RP5-1050D4.2;ENSG00000234203.1;antisense,RP5-1050D4.3;ENSG00000262429.1;antisense,SPAG7;ENSG00000091640.3;protein_coding	hypo	unmutCLL_NBCB	0.47012	0.99056	0.809045	0.979167
chr17	49176182	49176287	genebody,promoter	chr17:49039534-49198226,chr17:49175534-49175639	SPAG9;ENSG00000008294.16;protein_coding,snoU13;ENSG00000238815.1;snoRNA	hypo	unmutCLL_NBCB	0.6133	0.99822	0.910727	0.996
chr17	49195263	49195400	genebody	chr17:49039534-49198226	SPAG9;ENSG00000008294.16;protein_coding	hypo	unmutCLL_NBCB	0.43379	0.99413	0.682406	0.9578
chr17	54285675	54285715	genebody	chr17:54188318-54589020	ANKFN1;ENSG00000153930.6;protein_coding	hypo	unmutCLL_NBCB	0.738	0.99656	0.822273	0.964333
chr17	54831374	54831483	intergenic	NA:NA-NA	NA	hypo	unmutCLL_NBCB	0.6841	0.99533	0.86475	0.936
chr17	55390366	55390484	genebody	chr17:55333211-55762046	MSI2;ENSG00000153944.6;protein_coding	hypo	unmutCLL_NBCB	0.38494	0.98875	0.758848	0.987111
chr17	55391070	55391104	genebody	chr17:55333211-55762046	MSI2;ENSG00000153944.6;protein_coding	hypo	unmutCLL_NBCB	0.4056	0.99889	0.538545	0.995667
chr17	55523262	55523285	genebody	chr17:55333211-55762046	MSI2;ENSG00000153944.6;protein_coding	hypo	unmutCLL_NBCB	0.4642	0.85111	0.989125	1
chr17	55572101	55572150	genebody	chr17:55333211-55762046	MSI2;ENSG00000153944.6;protein_coding	hypo	unmutCLL_NBCB	0.66764	0.98578	0.741773	0.918833
chr17	55593842	55593973	genebody	chr17:55333211-55762046	MSI2;ENSG00000153944.6;protein_coding	hypo	unmutCLL_NBCB	0.5019	1	0.83945	0.9925
chr17	55982300	55982518	genebody	chr17:55938603-56032684	CUEDC1;ENSG00000180891.8;protein_coding	hypo	unmutCLL_NBCB	0.65266	0.90948	0.852303	0.980944
chr17	56395798	56396050	genebody	chr17:56378591-56406152	BZRAP1;ENSG00000005379.11;protein_coding	hypo	unmutCLL_NBCB	0.72778	0.9944	0.76128	0.9215
chr17	57437596	57437734	genebody	chr17:57409049-57479090	YPEL2;ENSG00000175155.4;protein_coding	hypo	unmutCLL_NBCB	0.6704	0.9981	0.791627	0.981722
chr17	57500941	57501042	intergenic	NA:NA-NA	NA	hypo	mutCLL_MBC,unmutCLL_NBCB	0.30616	0.98556	0.58597	0.95111
chr17	57502295	57502312	intergenic	NA:NA-NA	NA	hypo	mutCLL_MBC,unmutCLL_NBCB	0.095933	0.99678	0.30464	0.98011
chr17	57860283	57860412	genebody,promoter	chr17:57784552-57919616,chr17:57862173-57862396	RP11-619I22.1;ENSG00000267637.1;sense_intronic,VMP1;ENSG00000062716.6;protein_coding	hypo	mutCLL_MBC,unmutCLL_NBCB	0.30868	0.99641	0.56059	0.94841
chr17	57866751	57866809	genebody	chr17:57784552-57919616	VMP1;ENSG00000062716.6;protein_coding	hypo	unmutCLL_NBCB	0.70828	0.99247	0.931644	0.9795
chr17	57900967	57901035	genebody	chr17:57784552-57919616	VMP1;ENSG00000062716.6;protein_coding	hypo	unmutCLL_NBCB	0.74462	0.99633	0.813182	0.998667
chr17	58224194	58224255	promoter	chr17:58227296-58248260	CA4;ENSG00000167434.5;protein_coding	hypo	unmutCLL_NBCB	0.70808	0.98856	0.7035	0.846
chr17	60543688	60543859	genebody	chr17:60536018-60692842	TLK2;ENSG00000146872.13;protein_coding	hypo	unmutCLL_NBCB	0.73641	0.99387	0.89431	0.945533
chr17	60578379	60578414	genebody	chr17:60536018-60692842	TLK2;ENSG00000146872.13;protein_coding	hypo	mutCLL_MBC,unmutCLL_NBCB	0.096824	0.99467	0.42918	0.98067
chr17	61354671	61354740	genebody	chr17:61086916-61505060,chr17:61271290-61416414	AC037445.1;ENSG00000233635.2;antisense,TANC2;ENSG00000170921.10;protein_coding	hypo	unmutCLL_NBCB	0.49427	0.99878	0.838939	0.970167
chr17	61737039	61737136	genebody	chr17:61699774-61773663	MAP3K3;ENSG00000198909.3;protein_coding	hypo	mutCLL_MBC	0.7496	0.980583	0.69959	0.9806
chr17	62022692	62022811	genebody	chr17:62015913-62050278	SCN4A;ENSG00000007314.7;protein_coding	hypo	unmutCLL_NBCB	0.177	0.98111	0.459975	0.971556
chr17	62296070	62296165	genebody	chr17:62224586-62340661	TEX2;ENSG00000136478.3;protein_coding	hypo	unmutCLL_NBCB	0.6933	1	0.718227	0.930167
chr17	63833287	63833415	genebody	chr17:63631655-64188202	CEP112;ENSG00000154240.12;protein_coding	hypo	mutCLL_MBC	0.85475	0.994	0.70112	0.96067
chr17	64245113	64245174	genebody	chr17:64208150-64252643	APOH;ENSG00000091583.6;protein_coding	hypo	unmutCLL_NBCB	0.60218	0.98222	0.795045	0.936167
chr17	65021433	65021539	genebody,promoter	chr17:64961025-65029514,chr17:65016049-65017859	CACNG4;ENSG00000075461.5;protein_coding,RP11-349A8.3;ENSG00000264491.1;antisense	hypo	unmutCLL_NBCB	0.6105	0.96511	0.747636	0.884333
chr17	65363420	65363458	promoter	chr17:65334031-65362743	PSMD12;ENSG00000197170.5;protein_coding	hypo	mutCLL_MBC	0.6314	0.992167	0.488	0.82067
chr17	65378863	65378896	genebody	chr17:65373574-65693372	PITPNC1;ENSG00000154217.10;protein_coding	hypo	mutCLL_MBC	0.84575	1	0.64727	0.93767
chr17	65670877	65670983	genebody	chr17:65373574-65693372	PITPNC1;ENSG00000154217.10;protein_coding	hypo	unmutCLL_NBCB	0.71733	0.99193	0.744189	0.980917
chr17	65679948	65679998	genebody	chr17:65373574-65693372	PITPNC1;ENSG00000154217.10;protein_coding	hypo	unmutCLL_NBCB	0.67197	0.99911	0.621379	0.977833
chr17	66426093	66426135	genebody	chr17:66409763-66521090,chr17:66417088-66453654	RP11-120M18.2;ENSG00000267009.2;processed_transcript,WIPI1;ENSG00000070540.8;protein_coding	hypo	unmutCLL_NBCB	0.53449	1	0.797	0.993
chr17	66492273	66492338	genebody	chr17:66409763-66521090	RP11-120M18.2;ENSG00000267009.2;processed_transcript	hypo	unmutCLL_NBCB	0.65706	0.98856	0.606455	0.935167
chr17	6827081	6827150	genebody	chr17:6757179-6857426,chr17:6779953-6915668	AC027763.2;ENSG00000215067.5;protein_coding,ALOX12P2;ENSG00000262943.3;pseudogene	hypo	unmutCLL_NBCB	0.7401	0.9966	0.774333	0.967917
chr17	694978	695071	genebody,promoter	chr17:685512-695749,chr17:692983-693765	RNMTL1;ENSG00000171861.6;protein_coding,RP11-676J12.8;ENSG00000262434.1;antisense	hypo	unmutCLL_NBCB	0.70659	0.99056	0.812136	0.915333
chr17	70384783	70384805	genebody	chr17:70319263-70636611	LINC00511;ENSG00000227036.2;lincRNA	hypo	unmutCLL_NBCB	0.59506	0.98211	0.7157	0.966667
chr17	70747875	70748010	genebody	chr17:70642087-71088851	SLC39A11;ENSG00000133195.7;protein_coding	hypo	unmutCLL_NBCB	0.72568	0.98875	0.934061	0.941111
chr17	7169173	7169307	promoter	chr17:7150147-7165408,chr17:7163221-7167302,chr17:7169373-7169485	CLDN7;ENSG00000181885.14;protein_coding,RP1-4G17.5;ENSG00000262302.1;protein_coding,Y_RNA;ENSG00000202251.1;misc_RNA	hypo	unmutCLL_NBCB	0.41105	0.99183	0.645367	0.969733
chr17	7169290	7169307	promoter	chr17:7150147-7165408,chr17:7163221-7167302,chr17:7169373-7169485	CLDN7;ENSG00000181885.14;protein_coding,RP1-4G17.5;ENSG00000262302.1;protein_coding,Y_RNA;ENSG00000202251.1;misc_RNA	hypo	mutCLL_MBC	0.0721333	0.987833	0.2957	0.92944
chr17	72646367	72646426	intergenic	NA:NA-NA	NA	hypo	unmutCLL_NBCB	0.67262	0.95722	0.895143	0.9215
chr17	72678763	72678813	genebody	chr17:72666716-72743474	RAB37;ENSG00000172794.15;protein_coding	hypo	unmutCLL_NBCB	0.72293	0.98989	0.862182	0.936167
chr17	72759015	72759147	genebody	chr17:72744790-72765492	SLC9A3R1;ENSG00000109062.5;protein_coding	hypo	unmutCLL_NBCB	0.67394	0.96167	0.810409	0.8425
chr17	73124328	73124392	genebody	chr17:73106046-73126360	ARMC7;ENSG00000125449.2;protein_coding	hypo	mutCLL_MBC	0.5141	0.9935	0.62039	0.94744
chr17	73124385	73124467	genebody	chr17:73106046-73126360	ARMC7;ENSG00000125449.2;protein_coding	hypo	unmutCLL_NBCB	0.69864	0.993	0.679068	0.978167
chr17	73237393	73237513	genebody	chr17:73232693-73258444	GGA3;ENSG00000125447.12;protein_coding	hypo	unmutCLL_NBCB	0.73181	0.99508	0.846833	0.932667
chr17	73305989	73306107	intergenic	NA:NA-NA	NA	hypo	unmutCLL_NBCB	0.45865	0.99767	0.742848	0.982
chr17	73532608	73532644	genebody	chr17:73521160-73571289	LLGL2;ENSG00000073350.9;protein_coding	hypo	unmutCLL_NBCB	0.62506	0.99022	0.778455	0.992
chr17	73571352	73571396	intergenic	NA:NA-NA	NA	hypo	mutCLL_MBC	0.46505	0.982833	0.67528	0.97822
chr17	73571352	73571443	intergenic	NA:NA-NA	NA	hypo	unmutCLL_NBCB	0.72881	0.99033	0.756394	0.972333
chr17	73797172	73797225	genebody	chr17:73780680-73821886	UNK;ENSG00000132478.5;protein_coding	hypo	unmutCLL_NBCB	0.61641	0.99178	0.768773	0.965333
chr17	7380564	7380597	genebody,promoter	chr17:7362684-7387582,chr17:7384720-7386383	SLC35G6;ENSG00000259224.1;protein_coding,ZBTB4;ENSG00000174282.7;protein_coding	hypo	unmutCLL_NBCB	0.70641	0.999	0.568389	0.928167
chr17	74223816	74223881	genebody	chr17:74138533-74236454	RNF157;ENSG00000141576.10;protein_coding	hypo	mutCLL_MBC	0.56545	0.996833	0.67198	0.95156
chr17	74241971	74241976	intergenic	NA:NA-NA	NA	hypo	mutCLL_MBC,unmutCLL_NBCB	0.092457	1	0.11824	0.99178
chr17	74273538	74273566	genebody	chr17:74270129-74303761	QRICH2;ENSG00000129646.9;protein_coding	hypo	unmutCLL_NBCB	0.68507	1	0.814455	0.998
chr17	74377766	74377817	genebody	chr17:74305566-74380602,chr17:74372664-74383941	PRPSAP1;ENSG00000161542.12;protein_coding,SPHK1;ENSG00000176170.9;protein_coding	hypo	unmutCLL_NBCB	0.54719	0.875	0.586667	0.750833
chr17	74728502	74728571	genebody,promoter	chr17:74722911-74730018,chr17:74729059-74734604,chr17:74731946-74777531	METTL23;ENSG00000181038.9;protein_coding,MFSD11;ENSG00000092931.7;protein_coding,RP11-318A15.7;ENSG00000267168.1;protein_coding	hypo	unmutCLL_NBCB	0.60334	0.98622	0.825591	0.857333
chr17	7484764	7484802	genebody,promoter	chr17:7476143-7485342,chr17:7482784-7485429,chr17:7486846-7496107	CD68;ENSG00000129226.9;protein_coding,MPDU1;ENSG00000129255.10;protein_coding,SNORA67;ENSG00000264772.2;processed_transcript	hypo	unmutCLL_NBCB	0.68432	0.96611	0.742091	0.9365
chr17	75205353	75205465	genebody	chr17:75082797-75213179	SEC14L1;ENSG00000129657.10;protein_coding	hypo	unmutCLL_NBCB	0.68909	0.99717	0.9586	1
chr17	75209763	75209919	genebody	chr17:75082797-75213179	SEC14L1;ENSG00000129657.10;protein_coding	hypo	unmutCLL_NBCB	0.60578	0.97717	0.845455	0.9924
chr17	75419499	75419546	genebody	chr17:75276650-75496678	SEPT9;ENSG00000184640.13;protein_coding	hypo	mutCLL_MBC,unmutCLL_NBCB	0.54194	0.98689	0.68731	0.94367
chr17	75438702	75438719	genebody,promoter	chr17:75276650-75496678,chr17:75438190-75438295	SEPT9;ENSG00000184640.13;protein_coding,Y_RNA;ENSG00000200651.1;misc_RNA	hypo	unmutCLL_NBCB	0.52387	0.99511	0.77785	0.938333
chr17	75462961	75463024	genebody,promoter	chr17:75276650-75496678,chr17:75465149-75467127	RP11-75C10.7;ENSG00000267263.1;sense_intronic,SEPT9;ENSG00000184640.13;protein_coding	hypo	unmutCLL_NBCB	0.68089	0.99333	0.871545	0.962833
chr17	75471824	75471924	genebody,promoter	chr17:75276650-75496678,chr17:75465243-75468852	RP11-75C10.9;ENSG00000267016.1;antisense,SEPT9;ENSG00000184640.13;protein_coding	hypo	unmutCLL_NBCB	0.73374	0.99493	0.875295	0.972833
chr17	75474608	75474625	genebody	chr17:75276650-75496678	SEPT9;ENSG00000184640.13;protein_coding	hypo	mutCLL_MBC	0.5852	0.997667	0.71828	0.97967
chr17	76116680	76117000	genebody	chr17:76106538-76128488	TMC6;ENSG00000141524.11;protein_coding	hypo	unmutCLL_NBCB	0.74752	0.99913	0.875587	0.991074
chr17	76118260	76118369	genebody	chr17:76106538-76128488	TMC6;ENSG00000141524.11;protein_coding	hypo	unmutCLL_NBCB	0.34237	0.87722	0.651242	0.996833
chr17	76139735	76139842	promoter	chr17:76142433-76162258	C17orf99;ENSG00000187997.7;protein_coding	hypo	unmutCLL_NBCB	0.70111	0.9862	0.871136	0.97875
chr17	76140949	76141037	promoter	chr17:76142433-76162258	C17orf99;ENSG00000187997.7;protein_coding	hypo	mutCLL_MBC,unmutCLL_NBCB	0.37727	0.96667	0.58576	0.88633
chr17	76141190	76141323	promoter	chr17:76142433-76162258	C17orf99;ENSG00000187997.7;protein_coding	hypo	unmutCLL_NBCB	0.68909	0.99687	0.778091	0.985667
chr17	76142063	76142211	promoter	chr17:76142433-76162258	C17orf99;ENSG00000187997.7;protein_coding	hypo	unmutCLL_NBCB	0.7031	0.99533	0.840039	0.970333
chr17	76153599	76153733	genebody	chr17:76142433-76162258	C17orf99;ENSG00000187997.7;protein_coding	hypo	mutCLL_MBC,unmutCLL_NBCB	0.29335	0.99572	0.48773	0.99044
chr17	76163280	76163297	promoter	chr17:76164638-76169608	SYNGR2;ENSG00000108639.3;protein_coding	hypo	unmutCLL_NBCB	0.6789	0.97367	0.75555	0.983
chr17	76206241	76206257	promoter	chr17:76210266-76221717	BIRC5;ENSG00000089685.10;protein_coding	hypo	unmutCLL_NBCB	0.68877	0.98322	0.873909	0.956
chr17	76454982	76454991	genebody	chr17:76419777-76573476	DNAH17;ENSG00000187775.12;protein_coding	hypo	unmutCLL_NBCB	0.73147	0.98711	0.789591	0.9185
chr17	76632089	76632177	promoter	chr17:76613470-76628139	CTD-2357A8.3;ENSG00000267123.1;lincRNA	hypo	unmutCLL_NBCB	0.6818	0.99189	0.758576	0.954
chr17	76746659	76746759	genebody	chr17:76670129-76778379	CYTH1;ENSG00000108669.12;protein_coding	hypo	unmutCLL_NBCB	0.53474	0.9965	0.758152	0.969
chr17	76754507	76754641	genebody	chr17:76670129-76778379	CYTH1;ENSG00000108669.12;protein_coding	hypo	unmutCLL_NBCB	0.55514	0.99024	0.804045	0.972667
chr17	76839837	76839948	promoter	chr17:76783462-76837523	USP36;ENSG00000055483.15;protein_coding	hypo	unmutCLL_NBCB	0.71235	0.99175	0.805833	0.953111
chr17	76963485	76963550	intergenic	NA:NA-NA	NA	hypo	mutCLL_MBC	0.70004	0.996133	0.59238	0.95328
chr17	77042736	77042744	genebody	chr17:77018895-77045870	C1QTNF1;ENSG00000173918.10;protein_coding	hypo	mutCLL_MBC	0.7955	1	0.67627	0.93722
chr17	77079361	77079386	genebody	chr17:77071020-77084681	ENGASE;ENSG00000167280.12;protein_coding	hypo	unmutCLL_NBCB	0.67971	0.946	0.806091	0.854333
chr17	77083215	77083242	genebody	chr17:77071020-77084681	ENGASE;ENSG00000167280.12;protein_coding	hypo	unmutCLL_NBCB	0.73188	0.98611	0.711917	0.883
chr17	77154493	77154614	genebody	chr17:77085426-77613550	RBFOX3;ENSG00000167281.14;protein_coding	hypo	unmutCLL_NBCB	0.71806	0.98375	0.777955	0.890333
chr17	7725620	7725735	genebody	chr17:7620671-7737062	DNAH2;ENSG00000183914.10;protein_coding	hypo	unmutCLL_NBCB	0.6834	0.96011	0.443778	0.972667
chr17	77315439	77315522	genebody	chr17:77085426-77613550	RBFOX3;ENSG00000167281.14;protein_coding	hypo	unmutCLL_NBCB	0.6195	0.87156	0.756167	0.877667
chr17	7752142	7752230	genebody	chr17:7743221-7758114	KDM6B;ENSG00000132510.6;protein_coding	hypo	unmutCLL_NBCB	0.7142	0.98833	0.806927	0.95225
chr17	7752721	7752828	genebody	chr17:7743221-7758114	KDM6B;ENSG00000132510.6;protein_coding	hypo	unmutCLL_NBCB	0.67559	0.98644	0.656682	0.9275
chr17	77546084	77546169	genebody	chr17:77085426-77613550	RBFOX3;ENSG00000167281.14;protein_coding	hypo	unmutCLL_NBCB	0.70375	0.95878	0.7999	0.903667
chr17	78133851	78133918	intergenic	NA:NA-NA	NA	hypo	unmutCLL_NBCB	0.49029	0.97389	0.855905	0.918
chr17	78187521	78187560	genebody	chr17:78180514-78194722	SGSH;ENSG00000181523.8;protein_coding	hypo	mutCLL_MBC	0.61035	1	0.72625	0.97978
chr17	78218017	78218072	genebody	chr17:78193497-78227299	SLC26A11;ENSG00000181045.10;protein_coding	hypo	unmutCLL_NBCB	0.74479	0.99889	0.863444	0.895833
chr17	78819869	78819926	genebody	chr17:78518618-78940171	RPTOR;ENSG00000141564.9;protein_coding	hypo	unmutCLL_NBCB	0.73607	0.99311	0.6328	0.925167
chr17	78898962	78899073	genebody	chr17:78518618-78940171	RPTOR;ENSG00000141564.9;protein_coding	hypo	unmutCLL_NBCB	0.62179	0.99361	0.708926	0.962111
chr17	78898986	78899041	genebody	chr17:78518618-78940171	RPTOR;ENSG00000141564.9;protein_coding	hypo	mutCLL_MBC	0.623	0.987333	0.64076	0.93178
chr17	79203478	79203509	genebody,promoter	chr17:79202076-79212891,chr17:79202506-79207783	AC027601.1;ENSG00000260005.2;antisense,ENTHD2;ENSG00000167302.5;protein_coding	hypo	unmutCLL_NBCB	0.73448	0.99278	0.72205	0.947667
chr17	79297414	79297440	genebody	chr17:79285073-79304474	TMEM105;ENSG00000185332.2;protein_coding	hypo	mutCLL_MBC,unmutCLL_NBCB	0.48033	0.90313	0.5394	0.86207
chr17	79314162	79314293	intergenic	NA:NA-NA	NA	hypo	mutCLL_MBC	0.830534	0.965833	0.6566	0.96433
chr17	79340575	79340655	genebody	chr17:79336071-79348014	RP11-1055B8.2;ENSG00000263154.1;lincRNA	hypo	unmutCLL_NBCB	0.70512	0.99278	0.813167	0.861667
chr17	79561565	79561582	genebody	chr17:79523912-79615495	NPLOC4;ENSG00000182446.9;protein_coding	hypo	unmutCLL_NBCB	0.59273	0.99578	0.518563	0.991333
chr17	79583068	79583170	genebody	chr17:79523912-79615495	NPLOC4;ENSG00000182446.9;protein_coding	hypo	unmutCLL_NBCB	0.63892	0.98933	0.861848	0.931
chr17	79601036	79601049	genebody,promoter	chr17:79523912-79615495,chr17:79604196-79615779	NPLOC4;ENSG00000182446.9;protein_coding,TSPAN10;ENSG00000182612.6;polymorphic_pseudogene	hypo	unmutCLL_NBCB	0.60963	0.99567	0.724773	0.9755
chr17	79601842	79601887	genebody,promoter	chr17:79523912-79615495,chr17:79604196-79615779	NPLOC4;ENSG00000182446.9;protein_coding,TSPAN10;ENSG00000182612.6;polymorphic_pseudogene	hypo	mutCLL_MBC	0.531867	0.994889	0.64759	0.9655
chr17	79601842	79601943	genebody,promoter	chr17:79523912-79615495,chr17:79604196-79615779	NPLOC4;ENSG00000182446.9;protein_coding,TSPAN10;ENSG00000182612.6;polymorphic_pseudogene	hypo	unmutCLL_NBCB	0.51092	0.99347	0.647591	0.9655
chr17	79640699	79640822	genebody,promoter	chr17:79633393-79640934,chr17:79643030-79643116	AC139530.1;ENSG00000263853.1;miRNA,CCDC137;ENSG00000185298.8;protein_coding	hypo	unmutCLL_NBCB	0.66989	0.96829	0.804509	0.938
chr17	79831469	79831502	promoter	chr17:79825596-79829282	ARHGDIA;ENSG00000141522.7;protein_coding	hypo	unmutCLL_NBCB	0.55098	0.99711	0.581682	0.972167
chr17	79914451	79914535	genebody	chr17:79910387-79919716	NOTUM;ENSG00000185269.7;protein_coding	hypo	unmutCLL_NBCB	0.59875	0.98967	0.904967	0.954583
chr17	79952713	79952946	genebody	chr17:79934682-79975282	ASPSCR1;ENSG00000169696.11;protein_coding	hypo	unmutCLL_NBCB	0.53835	0.99567	0.900458	0.983022
chr17	80041391	80041416	genebody	chr17:80036213-80056208	FASN;ENSG00000169710.6;protein_coding	hypo	unmutCLL_NBCB	0.6902	0.97122	0.790556	0.907833
chr17	80079744	80080060	genebody	chr17:80059335-80170706	CCDC57;ENSG00000176155.14;protein_coding	hypo	unmutCLL_NBCB	0.54075	0.9921	0.749881	0.935074
chr17	8010002	8010035	genebody	chr17:7999217-8022365	ALOXE3;ENSG00000179148.5;protein_coding	hypo	unmutCLL_NBCB	0.70643	0.99556	0.863286	0.93
chr17	80158523	80158558	genebody	chr17:80059335-80170706	CCDC57;ENSG00000176155.14;protein_coding	hypo	unmutCLL_NBCB	0.61979	0.97789	0.740167	0.994667
chr17	80175541	80175617	promoter	chr17:80059335-80170706	CCDC57;ENSG00000176155.14;protein_coding	hypo	unmutCLL_NBCB	0.71366	0.98752	0.840008	0.972556
chr17	80257206	80257264	intergenic	NA:NA-NA	NA	hypo	unmutCLL_NBCB	0.67453	0.96083	0.944	0.985667
chr17	80269122	80269164	intergenic	NA:NA-NA	NA	hypo	unmutCLL_NBCB	0.60588	0.96544	0.833182	0.880333
chr17	80279673	80279699	genebody,promoter	chr17:80272743-80275478,chr17:80278899-80291950	CD7;ENSG00000173762.3;protein_coding,SECTM1;ENSG00000141574.3;protein_coding	hypo	unmutCLL_NBCB	0.51823	0.99389	0.8955	0.9935
chr17	80290050	80290310	promoter	chr17:80278899-80291950	SECTM1;ENSG00000141574.3;protein_coding	hypo	unmutCLL_NBCB	0.57326	0.98561	0.821512	0.951926
chr17	80327998	80328159	promoter	chr17:80332152-80333462	UTS2R;ENSG00000181408.2;protein_coding	hypo	unmutCLL_NBCB	0.67923	0.98147	0.795167	0.929
chr17	80508667	80508850	genebody	chr17:80477588-80602538	FOXK2;ENSG00000141568.15;protein_coding	hypo	unmutCLL_NBCB	0.45108	0.98911	0.741943	0.944792
chr17	80508670	80508725	genebody	chr17:80477588-80602538	FOXK2;ENSG00000141568.15;protein_coding	hypo	mutCLL_MBC	0.23835	1	0.55705	0.90522
chr17	80597528	80597554	genebody	chr17:80477588-80602538,chr17:80572437-80606429	FOXK2;ENSG00000141568.15;protein_coding,WDR45B;ENSG00000141580.11;protein_coding	hypo	unmutCLL_NBCB	0.6026	0.99211	0.8211	0.984833
chr17	80608070	80608142	promoter	chr17:80572437-80606429	WDR45B;ENSG00000141580.11;protein_coding	hypo	unmutCLL_NBCB	0.70907	0.96167	0.923444	0.9
chr17	80644275	80644282	genebody	chr17:80612848-80656604	RAB40B;ENSG00000141542.6;protein_coding	hypo	unmutCLL_NBCB	0.68903	0.99644	0.9145	0.998833
chr17	80661929	80661974	intergenic	NA:NA-NA	NA	hypo	unmutCLL_NBCB	0.37232	0.95867	0.667583	0.871111
chr17	80665351	80665456	intergenic	NA:NA-NA	NA	hypo	unmutCLL_NBCB	0.72558	0.9986	0.892492	0.915833
chr17	80745040	80745310	genebody	chr17:80709939-80900724	TBCD;ENSG00000141556.16;protein_coding	hypo	unmutCLL_NBCB	0.73832	0.99667	0.895936	0.978769
chr17	80799017	80799112	genebody,promoter	chr17:80709939-80900724,chr17:80787310-80798454	TBCD;ENSG00000141556.16;protein_coding,ZNF750;ENSG00000141579.6;protein_coding	hypo	unmutCLL_NBCB	0.70772	0.99608	0.846182	0.962556
chr17	80825401	80825544	genebody	chr17:80709939-80900724	TBCD;ENSG00000141556.16;protein_coding	hypo	unmutCLL_NBCB	0.12885	0.99838	0.77599	0.992778
chr17	80825825	80825857	genebody	chr17:80709939-80900724	TBCD;ENSG00000141556.16;protein_coding	hypo	unmutCLL_NBCB	0.688	0.99233	0.958364	0.998333
chr17	835902	835969	genebody	chr17:702552-883010	NXN;ENSG00000167693.12;protein_coding	hypo	unmutCLL_NBCB	0.64755	0.99583	0.894152	0.968556
chr17	8708957	8709030	genebody	chr17:8706040-8770994	PIK3R6;ENSG00000174083.13;protein_coding	hypo	unmutCLL_NBCB	0.60449	0.97992	0.786143	0.975444
chr17	8947052	8947122	genebody	chr17:8924858-9147317	NTN1;ENSG00000065320.4;protein_coding	hypo	unmutCLL_NBCB	0.71642	0.99622	0.824591	0.861667
chr17	9517061	9517130	genebody	chr17:9479943-9546776	WDR16;ENSG00000166596.10;protein_coding	hypo	unmutCLL_NBCB	0.69843	0.98467	0.7946	0.887
chr17	9855829	9855927	genebody	chr17:9813925-10101868	GAS7;ENSG00000007237.14;protein_coding	hypo	unmutCLL_NBCB	0.73275	0.99	0.751545	0.986
chr17	9877580	9877693	genebody	chr17:9813925-10101868	GAS7;ENSG00000007237.14;protein_coding	hypo	unmutCLL_NBCB	0.72365	0.98589	0.657652	0.9455
chr18	11645971	11646016	intergenic	NA:NA-NA	NA	hypo	unmutCLL_NBCB	0.69482	0.99433	0.874864	0.900333
chr18	11886647	11886760	genebody	chr18:11882620-11909222	MPPE1;ENSG00000154889.12;protein_coding	hypo	mutCLL_MBC,unmutCLL_NBCB	0.434	0.98558	0.6969	0.98033
chr18	11965590	11965677	intergenic	NA:NA-NA	NA	hypo	unmutCLL_NBCB	0.59537	0.99256	0.868045	0.861833
chr18	12866161	12866218	genebody	chr18:12785476-12929642	PTPN2;ENSG00000175354.14;protein_coding	hypo	unmutCLL_NBCB	0.74448	0.9978	0.756295	0.9935
chr18	13924925	13924979	intergenic	NA:NA-NA	NA	hypo	unmutCLL_NBCB	0.18128	0.96867	0.652967	0.899111
chr18	14179082	14179094	promoter	chr18:14179095-14234796	ANKRD20A5P;ENSG00000186481.11;pseudogene	hyper	mutCLL_MBC	0.433688	0.0403333	0.4584	0.11511
chr18	1434062	1434099	intergenic	NA:NA-NA	NA	hypo	unmutCLL_NBCB	0.73712	0.98844	0.875786	0.936167
chr18	18658176	18658203	genebody	chr18:18526866-18691812	ROCK1;ENSG00000067900.6;protein_coding	hypo	unmutCLL_NBCB	0.61337	0.96533	0.750318	0.921
chr18	19035368	19035412	genebody,promoter	chr18:18822202-19105378,chr18:18960246-19030978,chr18:19030613-19030717	GREB1L;ENSG00000141449.10;protein_coding,RP11-296E23.1;ENSG00000265751.1;antisense,SNORD23;ENSG00000221139.1;snoRNA	hypo	unmutCLL_NBCB	0.69067	0.99656	0.85115	0.963
chr18	19286494	19286513	promoter	chr18:19230857-19284766,chr18:19284917-19450918	ABHD3;ENSG00000158201.5;protein_coding,MIB1;ENSG00000101752.7;protein_coding	hypo	unmutCLL_NBCB	0.72122	0.98989	0.914955	0.973167
chr18	19910640	19910669	intergenic	NA:NA-NA	NA	hypo	unmutCLL_NBCB	0.64979	0.92778	0.917273	0.965
chr18	2109026	2109115	genebody	chr18:1883524-2240847	RP11-161I6.2;ENSG00000263745.1;lincRNA	hypo	unmutCLL_NBCB	0.63957	0.98067	0.800909	0.893444
chr18	22145198	22145281	intergenic	NA:NA-NA	NA	hypo	unmutCLL_NBCB	0.68643	0.98744	0.69605	0.9225
chr18	25117070	25117156	genebody	chr18:24916342-25175128	RP11-739N10.1;ENSG00000264151.1;lincRNA	hypo	unmutCLL_NBCB	0.62526	0.94317	0.840697	0.920778
chr18	2639134	2639216	intergenic	NA:NA-NA	NA	hypo	mutCLL_MBC,unmutCLL_NBCB	0.41887	1	0.7025	0.96178
chr18	27426036	27426149	intergenic	NA:NA-NA	NA	hypo	mutCLL_MBC,unmutCLL_NBCB	0.72834	0.99283	0.69073	0.95092
chr18	27840631	27840685	intergenic	NA:NA-NA	NA	hypo	unmutCLL_NBCB	0.62156	0.985	0.7207	0.955167
chr18	29078341	29078368	promoter	chr18:29076607-29077158,chr18:29078005-29128971	DSG2;ENSG00000046604.8;protein_coding,RP11-650P15.1;ENSG00000266521.1;lincRNA	hyper	unmutCLL_NBCB	0.2806	0.026133	0.230886	0.088
chr18	2909787	2909815	genebody	chr18:2847027-2915991	EMILIN2;ENSG00000132205.6;protein_coding	hypo	unmutCLL_NBCB	0.53307	0.95456	0.7473	0.9165
chr18	29230822	29230889	genebody	chr18:29202209-29265799	B4GALT6;ENSG00000118276.7;protein_coding	hypo	unmutCLL_NBCB	0.71743	0.98589	0.803	0.938667
chr18	3094166	3094249	genebody,promoter	chr18:3066804-3220106,chr18:3093565-3093627	MYOM1;ENSG00000101605.8;protein_coding,RNU7-25P;ENSG00000252353.1;snRNA	hypo	unmutCLL_NBCB	0.65856	0.997	0.924727	1
chr18	3358341	3358443	intergenic	NA:NA-NA	NA	hypo	unmutCLL_NBCB	0.719	0.99811	0.885318	0.9925
chr18	33768494	33768549	promoter	chr18:33759958-33767411,chr18:33767481-33852120	MOCOS;ENSG00000075643.5;protein_coding,RP11-49I11.1;ENSG00000260552.1;antisense	hypo	unmutCLL_NBCB	0.51852	0.96511	0.722	0.893167
chr18	34338750	34338771	genebody	chr18:33877676-34360018	FHOD3;ENSG00000134775.11;protein_coding	hypo	unmutCLL_NBCB	0.67388	0.92489	0.8151	0.7685
chr18	3453298	3453512	genebody	chr18:3411605-3458409	TGIF1;ENSG00000177426.16;protein_coding	hypo	mutCLL_MBC,unmutCLL_NBCB	0.4397	0.94204	0.53331	0.89679
chr18	3550070	3550144	genebody	chr18:3496029-4455335	DLGAP1;ENSG00000170579.10;protein_coding	hypo	unmutCLL_NBCB	0.64583	0.99489	0.762333	0.9425
chr18	37002868	37002946	genebody	chr18:36786887-37380282	LINC00669;ENSG00000267374.1;lincRNA	hypo	unmutCLL_NBCB	0.72531	0.99622	0.726727	0.909333
chr18	37313411	37313488	genebody	chr18:36786887-37380282	LINC00669;ENSG00000267374.1;lincRNA	hypo	unmutCLL_NBCB	0.69407	0.984	0.935636	0.970833
chr18	37969470	37969512	intergenic	NA:NA-NA	NA	hypo	unmutCLL_NBCB	0.72971	0.9942	0.878682	0.9565
chr18	38126081	38126125	intergenic	NA:NA-NA	NA	hypo	unmutCLL_NBCB	0.70656	0.992	0.799	0.947
chr18	42372455	42372602	genebody	chr18:42260137-42648475	SETBP1;ENSG00000152217.12;protein_coding	hypo	unmutCLL_NBCB	0.18582	0.92233	0.490909	0.954083
chr18	42372529	42372558	genebody	chr18:42260137-42648475	SETBP1;ENSG00000152217.12;protein_coding	hypo	mutCLL_MBC	0.1347	0.926333	0.41292	0.94156
chr18	43081584	43081716	genebody	chr18:42792959-43263072,chr18:43063309-43109820	RP11-749H17.1;ENSG00000266988.1;sense_intronic,SLC14A2;ENSG00000132874.9;protein_coding	hypo	unmutCLL_NBCB	0.71867	0.98278	0.811	0.949833
chr18	43663665	43663875	intergenic	NA:NA-NA	NA	hypo	mutCLL_MBC,unmutCLL_NBCB	0.46002	0.9935	0.60289	0.94478
chr18	43732941	43732996	intergenic	NA:NA-NA	NA	hypo	unmutCLL_NBCB	0.67249	0.98575	0.740091	0.983778
chr18	449693	449739	genebody	chr18:319360-500722	COLEC12;ENSG00000158270.10;protein_coding	hypo	unmutCLL_NBCB	0.5939	0.98978	0.8883	0.9535
chr18	52804098	52804172	intergenic	NA:NA-NA	NA	hypo	unmutCLL_NBCB	0.70348	0.9975	0.901182	0.940667
chr18	55308634	55308696	genebody,promoter	chr18:55297533-55405276,chr18:55306686-55405276	RP11-35G9.3;ENSG00000267040.2;antisense,RP11-35G9.5;ENSG00000267787.1;antisense	hypo	mutCLL_MBC,unmutCLL_NBCB	0.44294	0.99867	0.54646	0.9985
chr18	55963877	55963890	genebody	chr18:55711598-56068772	NEDD4L;ENSG00000049759.12;protein_coding	hypo	mutCLL_MBC	0.851125	0.995333	0.73137	1
chr18	55983215	55983242	genebody	chr18:55711598-56068772	NEDD4L;ENSG00000049759.12;protein_coding	hypo	mutCLL_MBC	0.441444	0.988	0.63979	0.96056
chr18	55983215	55983262	genebody	chr18:55711598-56068772	NEDD4L;ENSG00000049759.12;protein_coding	hypo	unmutCLL_NBCB	0.58748	0.99208	0.651148	0.960556
chr18	56135827	56135950	promoter	chr18:56133494-56133559	AC105105.1;ENSG00000252330.1;miRNA	hypo	unmutCLL_NBCB	0.72105	0.99078	0.715409	0.929667
chr18	56495624	56495687	genebody	chr18:56481111-56501596	RP11-108P20.4;ENSG00000267593.1;lincRNA	hypo	mutCLL_MBC	0.4758	1	0.59573	0.89467
chr18	58360162	58360175	genebody	chr18:58297399-58569959	RP11-325K19.1;ENSG00000267098.1;lincRNA	hypo	mutCLL_MBC	0.79825	1	0.67512	0.99511
chr18	60383529	60383540	promoter	chr18:60382671-60647666	PHLPP1;ENSG00000081913.9;protein_coding	hyper	unmutCLL_NBCB	0.3339	0.013333	0.248682	0.0641667
chr18	60543124	60543260	genebody	chr18:60382671-60647666	PHLPP1;ENSG00000081913.9;protein_coding	hypo	unmutCLL_NBCB	0.57831	0.95767	0.834121	0.981889
chr18	60618447	60618464	genebody	chr18:60382671-60647666	PHLPP1;ENSG00000081913.9;protein_coding	hypo	unmutCLL_NBCB	0.71632	1	0.753567	0.983333
chr18	60771385	60771469	intergenic	NA:NA-NA	NA	hypo	unmutCLL_NBCB	0.70281	0.98178	0.882667	0.987667
chr18	60903872	60904070	genebody	chr18:60790578-60987361	BCL2;ENSG00000171791.10;protein_coding	hypo	unmutCLL_NBCB	0.69898	0.99692	0.876336	0.991958
chr18	62747745	62747835	intergenic	NA:NA-NA	NA	hypo	unmutCLL_NBCB	0.72167	0.98067	0.72485	0.923333
chr18	65427682	65427818	genebody	chr18:65183782-65566856	RP11-638L3.1;ENSG00000265533.1;lincRNA	hypo	unmutCLL_NBCB	0.653	0.98933	0.831727	0.976917
chr18	66402379	66402436	genebody	chr18:66382445-66722426	CCDC102B;ENSG00000150636.11;protein_coding	hypo	mutCLL_MBC,unmutCLL_NBCB	0.60865	0.99956	0.56975	0.96633
chr18	66610978	66611097	genebody	chr18:66382445-66722426	CCDC102B;ENSG00000150636.11;protein_coding	hypo	unmutCLL_NBCB	0.73255	0.99125	0.862795	0.957889
chr18	69026547	69026606	intergenic	NA:NA-NA	NA	hypo	unmutCLL_NBCB	0.7342	0.98733	0.87335	0.967667
chr18	70931687	70931712	promoter	chr18:70818475-70931715	RP11-169F17.1;ENSG00000263711.1;protein_coding	hypo	mutCLL_MBC	0.417222	0.998	0.43153	0.92878
chr18	72714583	72714628	genebody	chr18:72265105-72777627	ZNF407;ENSG00000215421.5;protein_coding	hypo	mutCLL_MBC	0.735567	0.988167	0.661	0.98689
chr18	73166650	73166690	intergenic	NA:NA-NA	NA	hypo	unmutCLL_NBCB	0.68907	0.98144	0.775182	0.89
chr18	74059719	74059868	intergenic	NA:NA-NA	NA	hypo	unmutCLL_NBCB	0.62017	0.96411	0.800573	0.906333
chr18	74586615	74586727	genebody	chr18:74534562-74682683	ZNF236;ENSG00000130856.11;protein_coding	hypo	unmutCLL_NBCB	0.27194	0.99172	0.837345	0.9902
chr18	74692222	74692264	genebody	chr18:74686645-74696118,chr18:74690782-74845639	MBP;ENSG00000197971.10;protein_coding,RP11-862L9.3;ENSG00000266844.1;antisense	hypo	unmutCLL_NBCB	0.70377	0.99608	0.922485	0.942333
chr18	7480140	7480248	intergenic	NA:NA-NA	NA	hypo	unmutCLL_NBCB	0.7088	0.98756	0.848364	0.940167
chr18	75612279	75612311	intergenic	NA:NA-NA	NA	hyper	unmutCLL_NBCB	0.5202	0.026778	0.425677	0.06775
chr18	75612279	75612327	intergenic	NA:NA-NA	NA	hyper	mutCLL_MBC	0.47905	0.0230909	0.36179	0.052889
chr18	75978681	75978755	intergenic	NA:NA-NA	NA	hypo	unmutCLL_NBCB	0.71175	0.99367	0.761	0.914667
chr18	76084608	76084685	intergenic	NA:NA-NA	NA	hypo	unmutCLL_NBCB	0.66968	0.977	0.884056	0.9605
chr18	76495687	76495780	intergenic	NA:NA-NA	NA	hypo	unmutCLL_NBCB	0.6571	0.96078	0.865909	0.8975
chr18	7675979	7676029	genebody	chr18:7566779-8406859	PTPRM;ENSG00000173482.12;protein_coding	hypo	unmutCLL_NBCB	0.68503	0.99611	0.78005	0.904667
chr18	76970057	76970141	genebody	chr18:76829284-77138283	ATP9B;ENSG00000166377.15;protein_coding	hypo	unmutCLL_NBCB	0.61507	1	0.713136	0.936667
chr18	77145923	77146027	intergenic	NA:NA-NA	NA	hypo	mutCLL_MBC	0.769167	0.996833	0.6012	0.87667
chr18	77166990	77167142	genebody	chr18:77155855-77289325	NFATC1;ENSG00000131196.13;protein_coding	hypo	unmutCLL_NBCB	0.65762	0.99417	0.872946	0.99
chr18	77170644	77170722	genebody	chr18:77155855-77289325	NFATC1;ENSG00000131196.13;protein_coding	hypo	mutCLL_MBC,unmutCLL_NBCB	0.41883	0.99822	0.5229	0.95656
chr18	77183178	77183257	genebody	chr18:77155855-77289325	NFATC1;ENSG00000131196.13;protein_coding	hypo	unmutCLL_NBCB	0.59737	0.99958	0.658476	0.972222
chr18	77185378	77185450	genebody	chr18:77155855-77289325	NFATC1;ENSG00000131196.13;protein_coding	hypo	unmutCLL_NBCB	0.08263	0.99483	0.4122	0.988111
chr18	77185551	77185635	genebody	chr18:77155855-77289325	NFATC1;ENSG00000131196.13;protein_coding	hypo	unmutCLL_NBCB	0.45759	0.99792	0.641944	0.992556
chr18	77186602	77187112	genebody	chr18:77155855-77289325	NFATC1;ENSG00000131196.13;protein_coding	hypo	unmutCLL_NBCB	0.73064	0.99238	0.792032	0.954604
chr18	77188393	77188510	genebody	chr18:77155855-77289325	NFATC1;ENSG00000131196.13;protein_coding	hypo	unmutCLL_NBCB	0.67974	0.99853	0.791458	0.9672
chr18	77191945	77191995	genebody	chr18:77155855-77289325	NFATC1;ENSG00000131196.13;protein_coding	hypo	unmutCLL_NBCB	0.70193	0.99173	0.833932	0.966833
chr18	77193392	77193463	genebody	chr18:77155855-77289325	NFATC1;ENSG00000131196.13;protein_coding	hypo	mutCLL_MBC	0.0647407	0.991667	0.32119	0.98225
chr18	77193397	77193866	genebody	chr18:77155855-77289325	NFATC1;ENSG00000131196.13;protein_coding	hypo	unmutCLL_NBCB	0.59627	0.99686	0.782803	0.986586
chr18	77197418	77197470	genebody	chr18:77155855-77289325	NFATC1;ENSG00000131196.13;protein_coding	hypo	mutCLL_MBC,unmutCLL_NBCB	0.093266	0.99633	0.2479	0.961
chr18	77198318	77198422	genebody	chr18:77155855-77289325	NFATC1;ENSG00000131196.13;protein_coding	hypo	unmutCLL_NBCB	0.118	0.98493	0.259252	0.95175
chr18	77198374	77198422	genebody	chr18:77155855-77289325	NFATC1;ENSG00000131196.13;protein_coding	hypo	mutCLL_MBC	0.128633	0.986444	0.19342	0.93058
chr18	77201016	77201185	genebody	chr18:77155855-77289325	NFATC1;ENSG00000131196.13;protein_coding	hypo	unmutCLL_NBCB	0.60776	0.99686	0.809606	0.990111
chr18	77202237	77202279	genebody	chr18:77155855-77289325	NFATC1;ENSG00000131196.13;protein_coding	hypo	unmutCLL_NBCB	0.72428	0.987	0.767318	0.9255
chr18	77205442	77205599	genebody	chr18:77155855-77289325	NFATC1;ENSG00000131196.13;protein_coding	hypo	unmutCLL_NBCB	0.49435	0.99617	0.752059	0.986067
chr18	77207075	77207280	genebody	chr18:77155855-77289325	NFATC1;ENSG00000131196.13;protein_coding	hypo	unmutCLL_NBCB	0.46209	0.99531	0.876309	0.972333
chr18	77207264	77207280	genebody	chr18:77155855-77289325	NFATC1;ENSG00000131196.13;protein_coding	hypo	mutCLL_MBC	0.1939	0.997333	0.68715	0.98978
chr18	77208961	77209052	genebody	chr18:77155855-77289325	NFATC1;ENSG00000131196.13;protein_coding	hypo	unmutCLL_NBCB	0.72241	0.99617	0.860388	0.981867
chr18	77209672	77209722	genebody	chr18:77155855-77289325	NFATC1;ENSG00000131196.13;protein_coding	hypo	unmutCLL_NBCB	0.69313	0.99944	0.957727	0.994133
chr18	77211310	77211372	genebody	chr18:77155855-77289325	NFATC1;ENSG00000131196.13;protein_coding	hypo	unmutCLL_NBCB	0.45502	0.9975	0.9312	0.976111
chr18	77212164	77212581	genebody	chr18:77155855-77289325	NFATC1;ENSG00000131196.13;protein_coding	hypo	unmutCLL_NBCB	0.52092	0.99572	0.825618	0.977772
chr18	77250292	77250412	genebody	chr18:77155855-77289325	NFATC1;ENSG00000131196.13;protein_coding	hypo	unmutCLL_NBCB	0.4173	0.95	0.630136	0.9835
chr18	77273528	77273733	genebody,promoter	chr18:77155855-77289325,chr18:77275811-77276057	AC018445.1;ENSG00000269679.1;protein_coding,NFATC1;ENSG00000131196.13;protein_coding	hypo	unmutCLL_NBCB	0.71496	0.99338	0.816635	0.986077
chr18	77275668	77275741	genebody,promoter	chr18:77155855-77289325,chr18:77275811-77276057	AC018445.1;ENSG00000269679.1;protein_coding,NFATC1;ENSG00000131196.13;protein_coding	hypo	unmutCLL_NBCB	0.070594	0.9985	0.30837	0.993889
chr18	77275699	77275741	genebody,promoter	chr18:77155855-77289325,chr18:77275811-77276057	AC018445.1;ENSG00000269679.1;protein_coding,NFATC1;ENSG00000131196.13;protein_coding	hypo	mutCLL_MBC	0.05685	0.9975	0.313	0.99989
chr18	77278052	77278069	genebody,promoter	chr18:77155855-77289325,chr18:77275811-77276057	AC018445.1;ENSG00000269679.1;protein_coding,NFATC1;ENSG00000131196.13;protein_coding	hypo	mutCLL_MBC,unmutCLL_NBCB	0.36763	0.97989	0.68435	0.98522
chr18	77278179	77278407	genebody,promoter	chr18:77155855-77289325,chr18:77275811-77276057	AC018445.1;ENSG00000269679.1;protein_coding,NFATC1;ENSG00000131196.13;protein_coding	hypo	unmutCLL_NBCB	0.69376	0.994	0.851783	0.974667
chr18	77286790	77286861	genebody	chr18:77155855-77289325	NFATC1;ENSG00000131196.13;protein_coding	hypo	unmutCLL_NBCB	0.67237	1	0.747727	0.985444
chr18	77373632	77373686	intergenic	NA:NA-NA	NA	hypo	unmutCLL_NBCB	0.6205	0.98933	0.712636	0.939167
chr18	77513376	77513386	genebody	chr18:77439800-77514510	CTDP1;ENSG00000060069.12;protein_coding	hypo	unmutCLL_NBCB	0.72491	0.99656	0.8546	0.994
chr18	77563747	77563774	genebody	chr18:77552725-77576365	RP11-154H12.3;ENSG00000267780.1;lincRNA	hypo	unmutCLL_NBCB	0.70183	0.99622	0.90745	0.984833
chr18	77677993	77678154	genebody	chr18:77662419-77711664	PQLC1;ENSG00000122490.14;protein_coding	hypo	unmutCLL_NBCB	0.65474	0.99893	0.6278	0.9475
chr18	77678075	77678131	genebody	chr18:77662419-77711664	PQLC1;ENSG00000122490.14;protein_coding	hypo	mutCLL_MBC	0.4674	0.997333	0.54344	0.93
chr18	7804369	7804449	genebody	chr18:7566779-8406859	PTPRM;ENSG00000173482.12;protein_coding	hypo	unmutCLL_NBCB	0.68686	0.977	0.790727	0.9215
chr18	8745555	8745615	genebody	chr18:8705658-8832776	SOGA2;ENSG00000168502.13;protein_coding	hypo	unmutCLL_NBCB	0.66713	0.97544	0.788864	0.972
chr18	9069207	9069324	intergenic	NA:NA-NA	NA	hypo	unmutCLL_NBCB	0.64985	0.99675	0.807682	0.983333
chr18	9210574	9210595	genebody	chr18:9102733-9254344,chr18:9136225-9285983	ANKRD12;ENSG00000101745.11;protein_coding,RP11-21J18.1;ENSG00000265257.1;processed_transcript	hypo	unmutCLL_NBCB	0.66751	0.98922	0.860864	0.961
chr18	9952377	9952419	genebody	chr18:9913998-9960018	VAPA;ENSG00000101558.9;protein_coding	hypo	unmutCLL_NBCB	0.68042	0.98944	0.8499	0.973833
chr19	1077972	1078051	genebody	chr19:1065921-1086627	HMHA1;ENSG00000180448.6;protein_coding	hypo	unmutCLL_NBCB	0.57832	0.994	0.55375	0.942333
chr19	1078774	1078859	genebody	chr19:1065921-1086627	HMHA1;ENSG00000180448.6;protein_coding	hypo	mutCLL_MBC	0.76825	1	0.69269	0.95133
chr19	10831854	10831978	genebody	chr19:10828754-10944164	DNM2;ENSG00000079805.12;protein_coding	hypo	unmutCLL_NBCB	0.6183	0.99617	0.64485	0.948778
chr19	1083767	1083865	genebody	chr19:1065921-1086627	HMHA1;ENSG00000180448.6;protein_coding	hypo	mutCLL_MBC	0.255	0.997067	0.54662	0.95467
chr19	10838718	10838799	genebody	chr19:10828754-10944164	DNM2;ENSG00000079805.12;protein_coding	hypo	unmutCLL_NBCB	0.45778	0.99108	0.754364	0.964333
chr19	10838724	10838799	genebody	chr19:10828754-10944164	DNM2;ENSG00000079805.12;protein_coding	hypo	mutCLL_MBC	0.45775	0.9985	0.59061	0.95111
chr19	10872958	10873008	genebody	chr19:10828754-10944164	DNM2;ENSG00000079805.12;protein_coding	hypo	unmutCLL_NBCB	0.72075	0.984	0.821636	0.973667
chr19	10908923	10909202	genebody	chr19:10828754-10944164	DNM2;ENSG00000079805.12;protein_coding	hypo	unmutCLL_NBCB	0.73998	0.99028	0.921682	0.987056
chr19	11129633	11129653	genebody,promoter	chr19:11071597-11176071,chr19:11121592-11126687	CTC-215O4.4;ENSG00000266936.1;antisense,SMARCA4;ENSG00000127616.13;protein_coding	hypo	unmutCLL_NBCB	0.095124	0.99067	0.320917	0.948167
chr19	11171084	11171137	genebody	chr19:11071597-11176071	SMARCA4;ENSG00000127616.13;protein_coding	hypo	unmutCLL_NBCB	0.72313	0.99889	0.819773	0.993
chr19	1168962	1169034	genebody	chr19:1107635-1174282	SBNO2;ENSG00000064932.11;protein_coding	hypo	unmutCLL_NBCB	0.611	0.98607	0.846318	0.837917
chr19	1170125	1170181	genebody	chr19:1107635-1174282	SBNO2;ENSG00000064932.11;protein_coding	hypo	unmutCLL_NBCB	0.65712	0.97927	0.911531	0.953167
chr19	1239291	1239385	promoter	chr19:1228285-1238026,chr19:1238177-1239521,chr19:1241748-1244824	AC004221.2;ENSG00000267778.1;lincRNA,ATP5D;ENSG00000099624.3;protein_coding,C19orf26;ENSG00000099625.8;protein_coding	hypo	unmutCLL_NBCB	0.70075	0.99042	0.836879	0.993333
chr19	13128013	13128063	genebody,promoter	chr19:13106421-13209610,chr19:13124475-13125325	CTC-239J10.1;ENSG00000267417.1;antisense,NFIX;ENSG00000008441.12;protein_coding	hypo	unmutCLL_NBCB	0.68898	0.9816	0.725909	0.901417
chr19	13260021	13260081	promoter	chr19:13254871-13261197,chr19:13261228-13265722	IER2;ENSG00000160888.6;protein_coding,STX10;ENSG00000104915.10;protein_coding	hypo	unmutCLL_NBCB	0.5714	0.88089	0.80355	0.8455
chr19	1337931	1338120	genebody	chr19:1285889-1378430	MUM1;ENSG00000160953.10;protein_coding	hypo	unmutCLL_NBCB	0.73496	0.99057	0.783973	0.940778
chr19	1349214	1349234	genebody	chr19:1285889-1378430	MUM1;ENSG00000160953.10;protein_coding	hypo	mutCLL_MBC,unmutCLL_NBCB	0.1015	0.96589	0.23023	0.77456
chr19	13497322	13497367	genebody	chr19:13317255-13734804	CACNA1A;ENSG00000141837.14;protein_coding	hypo	unmutCLL_NBCB	0.68527	0.94456	0.808818	0.94
chr19	13782152	13782355	intergenic	NA:NA-NA	NA	hypo	mutCLL_MBC,unmutCLL_NBCB	0.55628	0.9899	0.67581	0.92648
chr19	13844032	13844089	promoter	chr19:13842573-13874110	CCDC130;ENSG00000104957.9;protein_coding	hypo	unmutCLL_NBCB	0.53155	0.93289	0.812773	0.951
chr19	13960072	13960148	intergenic	NA:NA-NA	NA	hypo	unmutCLL_NBCB	0.6469	0.93622	0.849727	0.875667
chr19	13985511	13985582	genebody,promoter	chr19:13972876-13991571,chr19:13985512-13985622,chr19:13985688-13985825	MIR181C;ENSG00000207613.1;miRNA,MIR181D;ENSG00000207585.1;miRNA,NANOS3;ENSG00000187556.6;protein_coding	hypo	unmutCLL_NBCB	0.69837	0.98778	0.849682	0.978167
chr19	13995727	13995823	genebody	chr19:13993160-14017265	C19orf57;ENSG00000132016.7;protein_coding	hypo	unmutCLL_NBCB	0.60401	0.9965	0.771114	0.944
chr19	14119155	14119218	promoter	chr19:14072349-14117851	RFX1;ENSG00000132005.4;protein_coding	hypo	unmutCLL_NBCB	0.59132	0.97689	0.8023	0.895833
chr19	1433482	1433622	genebody,promoter	chr19:1407567-1435719,chr19:1438357-1440583	DAZAP1;ENSG00000071626.12;protein_coding,RPS15;ENSG00000115268.5;protein_coding	hypo	unmutCLL_NBCB	0.65273	0.99526	0.855485	0.926917
chr19	14672348	14672361	genebody	chr19:14627896-14676792	TECR;ENSG00000099797.7;protein_coding	hypo	mutCLL_MBC	0.316	0.998667	0.361	0.991
chr19	15348534	15348545	genebody,promoter	chr19:15337729-15344246,chr19:15346329-15346819,chr19:15347646-15443356	AC004257.3;ENSG00000270143.1;lincRNA,BRD4;ENSG00000141867.13;protein_coding,EPHX3;ENSG00000105131.3;protein_coding	hypo	mutCLL_MBC,unmutCLL_NBCB	0.52187	0.98222	0.73742	0.99989
chr19	1558490	1558553	genebody,promoter	chr19:1553979-1554031,chr19:1554667-1568057,chr19:1556603-1556685	AC027307.1;ENSG00000222720.1;miRNA,AC027307.2;ENSG00000266399.1;miRNA,MEX3D;ENSG00000181588.15;protein_coding	hypo	unmutCLL_NBCB	0.5197	0.99156	0.858545	0.987833
chr19	15633680	15633816	genebody	chr19:15619303-15663128	CYP4F22;ENSG00000171954.8;protein_coding	hypo	unmutCLL_NBCB	0.40117	0.98433	0.631485	0.9175
chr19	1579279	1579651	genebody,promoter	chr19:1573594-1575474,chr19:1576638-1592882,chr19:1578337-1605444	AC005943.5;ENSG00000267161.1;lincRNA,MBD3;ENSG00000071655.13;protein_coding,UQCR11;ENSG00000267059.2;protein_coding	hypo	unmutCLL_NBCB	0.68005	0.99833	0.795486	0.9714
chr19	1579455	1579563	genebody,promoter	chr19:1573594-1575474,chr19:1576638-1592882,chr19:1578337-1605444	AC005943.5;ENSG00000267161.1;lincRNA,MBD3;ENSG00000071655.13;protein_coding,UQCR11;ENSG00000267059.2;protein_coding	hypo	mutCLL_MBC	0.39465	0.9975	0.61953	0.94267
chr19	16184247	16184326	genebody	chr19:16177830-16213813	TPM4;ENSG00000167460.10;protein_coding	hypo	mutCLL_MBC,unmutCLL_NBCB	0.50129	0.99622	0.62059	0.97911
chr19	1619372	1619403	genebody,promoter	chr19:1609290-1652604,chr19:1616490-1616594	RNU6-1223P;ENSG00000252933.1;snRNA,TCF3;ENSG00000071564.10;protein_coding	hypo	unmutCLL_NBCB	0.72767	0.98908	0.851455	0.945444
chr19	16238748	16238909	genebody	chr19:16222438-16245044,chr19:16234470-16250702	CTD-2231E14.8;ENSG00000269243.1;antisense,RAB8A;ENSG00000167461.7;protein_coding	hypo	unmutCLL_NBCB	0.69428	0.98633	0.862344	0.978708
chr19	1626019	1626091	genebody	chr19:1609290-1652604	TCF3;ENSG00000071564.10;protein_coding	hypo	unmutCLL_NBCB	0.57589	0.99222	0.69	0.925667
chr19	16269170	16269204	genebody	chr19:16244837-16269386	HSH2D;ENSG00000196684.8;protein_coding	hypo	unmutCLL_NBCB	0.67727	0.99311	0.816227	0.968167
chr19	16329104	16329212	genebody	chr19:16308388-16346160	AP1M1;ENSG00000072958.4;protein_coding	hypo	mutCLL_MBC,unmutCLL_NBCB	0.084615	0.93322	0.12962	0.93233
chr19	16459776	16459793	intergenic	NA:NA-NA	NA	hypo	unmutCLL_NBCB	0.23532	0.99567	0.93795	0.968667
chr19	16474201	16474270	genebody	chr19:16466049-16582896	EPS15L1;ENSG00000127527.9;protein_coding	hypo	mutCLL_MBC,unmutCLL_NBCB	0.18605	0.9875	0.38052	0.988
chr19	16474638	16474803	genebody	chr19:16466049-16582896	EPS15L1;ENSG00000127527.9;protein_coding	hypo	mutCLL_MBC,unmutCLL_NBCB	0.28389	0.99411	0.59456	0.99894
chr19	16485465	16485625	genebody	chr19:16466049-16582896	EPS15L1;ENSG00000127527.9;protein_coding	hypo	mutCLL_MBC	0.0309	0.989667	0.024157	0.97787
chr19	16495329	16495434	genebody	chr19:16466049-16582896	EPS15L1;ENSG00000127527.9;protein_coding	hypo	unmutCLL_NBCB	0.71394	0.99427	0.897114	0.97575
chr19	16610691	16610759	genebody,promoter	chr19:16589867-16607003,chr19:16589877-16739015,chr19:16607121-16632163	C19orf44;ENSG00000105072.4;protein_coding,CALR3;ENSG00000269058.1;protein_coding,CTD-3222D19.2;ENSG00000141979.4;protein_coding	hypo	unmutCLL_NBCB	0.59248	0.98256	0.944273	0.993667
chr19	16614124	16614204	genebody	chr19:16589877-16739015,chr19:16607121-16632163	C19orf44;ENSG00000105072.4;protein_coding,CTD-3222D19.2;ENSG00000141979.4;protein_coding	hypo	mutCLL_MBC,unmutCLL_NBCB	0.059384	1	0.087322	0.98113
chr19	16686982	16687006	genebody,promoter	chr19:16589877-16739015,chr19:16660641-16683193,chr19:16685717-16739873	CTD-3222D19.2;ENSG00000141979.4;protein_coding,MED26;ENSG00000105085.6;protein_coding,SLC35E1;ENSG00000127526.9;protein_coding	hypo	unmutCLL_NBCB	0.50676	0.988	0.635682	0.847
chr19	16781450	16781641	genebody	chr19:16771937-16800840	TMEM38A;ENSG00000072954.2;protein_coding	hypo	unmutCLL_NBCB	0.40268	0.99638	0.769252	0.987611
chr19	17343411	17343516	genebody	chr19:17342691-17356749	NR2F6;ENSG00000160113.5;protein_coding	hypo	unmutCLL_NBCB	0.74298	0.99878	0.827864	0.9175
chr19	17485039	17485100	genebody	chr19:17462256-17488159	PLVAP;ENSG00000130300.4;protein_coding	hypo	unmutCLL_NBCB	0.60866	0.90989	0.934318	0.958333
chr19	1753624	1753639	promoter	chr19:1752371-1780987	ONECUT3;ENSG00000205922.4;protein_coding	hyper	mutCLL_MBC	0.1066	0.0353333	0.35648	0.052556
chr19	17645320	17645337	genebody	chr19:17634109-17664648	FAM129C;ENSG00000167483.13;protein_coding	hypo	unmutCLL_NBCB	0.74122	0.99733	0.883864	0.964
chr19	17708951	17708960	intergenic	NA:NA-NA	NA	hypo	mutCLL_MBC,unmutCLL_NBCB	0.6029	0.99356	0.57803	1
chr19	17838174	17838193	genebody	chr19:17830050-17845325	MAP1S;ENSG00000130479.6;protein_coding	hypo	unmutCLL_NBCB	0.63793	0.99667	0.8924	0.972833
chr19	17839519	17839590	genebody	chr19:17830050-17845325,chr19:17838648-17845322	CTD-3149D2.4;ENSG00000268112.1;antisense,MAP1S;ENSG00000130479.6;protein_coding	hypo	mutCLL_MBC	0.55685	1	0.66485	0.93489
chr19	18124725	18124913	genebody	chr19:18111940-18124911	ARRDC2;ENSG00000105643.5;protein_coding	hypo	unmutCLL_NBCB	0.71286	0.97267	0.830121	0.938333
chr19	18367230	18367316	promoter	chr19:18318770-18366229	PDE4C;ENSG00000105650.17;protein_coding	hypo	unmutCLL_NBCB	0.73001	0.99278	0.81955	0.9325
chr19	18428356	18428451	genebody	chr19:18417039-18434084	LSM4;ENSG00000130520.6;protein_coding	hypo	unmutCLL_NBCB	0.642	0.95357	0.668111	0.956167
chr19	18428376	18428445	genebody	chr19:18417039-18434084	LSM4;ENSG00000130520.6;protein_coding	hypo	mutCLL_MBC	0.740906	0.99375	0.59793	0.9365
chr19	18532687	18532704	genebody	chr19:18529673-18545372	SSBP4;ENSG00000130511.11;protein_coding	hypo	mutCLL_MBC	0.83775	0.984667	0.62548	0.97022
chr19	18532687	18532767	genebody	chr19:18529673-18545372	SSBP4;ENSG00000130511.11;protein_coding	hypo	unmutCLL_NBCB	0.62705	0.97567	0.625485	0.970222
chr19	18831498	18831606	genebody	chr19:18794486-18893004	CRTC1;ENSG00000105662.11;protein_coding	hypo	unmutCLL_NBCB	0.61953	0.98767	0.831955	0.891167
chr19	18834751	18834783	genebody	chr19:18794486-18893004	CRTC1;ENSG00000105662.11;protein_coding	hypo	unmutCLL_NBCB	0.33387	0.9995	0.8607	0.953556
chr19	18834890	18834929	genebody	chr19:18794486-18893004	CRTC1;ENSG00000105662.11;protein_coding	hypo	mutCLL_MBC,unmutCLL_NBCB	0.14581	1	0.73136	0.99611
chr19	1887894	1888023	promoter	chr19:1876808-1885546	ABHD17A;ENSG00000129968.11;protein_coding	hypo	unmutCLL_NBCB	0.72478	0.98817	0.796073	0.966667
chr19	1888804	1888914	promoter	chr19:1876808-1885546	ABHD17A;ENSG00000129968.11;protein_coding	hypo	unmutCLL_NBCB	0.72207	0.97289	0.728591	0.8855
chr19	1907699	1907971	promoter	chr19:1905212-1926016,chr19:1905376-1913444	ADAT3;ENSG00000213638.4;protein_coding,SCAMP4;ENSG00000227500.5;protein_coding	hypo	unmutCLL_NBCB	0.74185	0.99548	0.746445	0.959133
chr19	1911231	1911294	genebody	chr19:1905212-1926016,chr19:1905376-1913444	ADAT3;ENSG00000213638.4;protein_coding,SCAMP4;ENSG00000227500.5;protein_coding	hypo	mutCLL_MBC	0.33245	0.9995	0.42176	0.79467
chr19	1912264	1912296	genebody	chr19:1905212-1926016,chr19:1905376-1913444	ADAT3;ENSG00000213638.4;protein_coding,SCAMP4;ENSG00000227500.5;protein_coding	hypo	unmutCLL_NBCB	0.72608	0.98933	0.86395	0.954167
chr19	1921108	1921198	genebody	chr19:1905212-1926016	SCAMP4;ENSG00000227500.5;protein_coding	hypo	mutCLL_MBC	0.124531	0.9975	0.68407	0.96413
chr19	1924056	1924350	genebody	chr19:1905212-1926016	SCAMP4;ENSG00000227500.5;protein_coding	hypo	unmutCLL_NBCB	0.59972	0.99467	0.821479	0.959033
chr19	19492569	19492711	promoter	chr19:19496634-19619740	GATAD2A;ENSG00000167491.13;protein_coding	hypo	unmutCLL_NBCB	0.63166	0.99056	0.7712	0.940133
chr19	1957081	1957119	genebody,promoter	chr19:1941187-1981337,chr19:1952529-1954585	CSNK1G2-AS1;ENSG00000180846.4;antisense,CSNK1G2;ENSG00000133275.11;protein_coding	hypo	unmutCLL_NBCB	0.69498	0.98967	0.904227	0.959333
chr19	1960516	1960560	genebody	chr19:1941187-1981337	CSNK1G2;ENSG00000133275.11;protein_coding	hypo	unmutCLL_NBCB	0.68703	0.99058	0.863571	0.941889
chr19	19636569	19636667	genebody	chr19:19626544-19644285,chr19:19627035-19646885,chr19:19627035-19648390	CTC-260F20.3;ENSG00000258674.5;protein_coding,NDUFA13;ENSG00000186010.14;protein_coding,YJEFN3;ENSG00000250067.7;protein_coding	hypo	unmutCLL_NBCB	0.58178	0.99627	0.900318	0.968083
chr19	19638155	19638329	genebody	chr19:19626544-19644285,chr19:19627035-19646885,chr19:19627035-19648390	CTC-260F20.3;ENSG00000258674.5;protein_coding,NDUFA13;ENSG00000186010.14;protein_coding,YJEFN3;ENSG00000250067.7;protein_coding	hypo	unmutCLL_NBCB	0.32299	0.99777	0.887832	0.965852
chr19	19690990	19691036	genebody	chr19:19672521-19729725	PBX4;ENSG00000105717.9;protein_coding	hypo	mutCLL_MBC	0.6663	0.997667	0.48473	0.74744
chr19	1976366	1976399	genebody	chr19:1941187-1981337	CSNK1G2;ENSG00000133275.11;protein_coding	hypo	unmutCLL_NBCB	0.57704	0.94022	0.814591	0.919333
chr19	1977236	1977286	genebody	chr19:1941187-1981337	CSNK1G2;ENSG00000133275.11;protein_coding	hypo	unmutCLL_NBCB	0.73894	0.99117	0.876208	0.942667
chr19	1987020	1987081	genebody,promoter	chr19:1985446-2034880,chr19:1989399-1990369	AC005306.3;ENSG00000267283.1;antisense,BTBD2;ENSG00000133243.4;protein_coding	hypo	unmutCLL_NBCB	0.72213	0.985	0.783167	0.8805
chr19	2007634	2007741	genebody	chr19:1985446-2034880	BTBD2;ENSG00000133243.4;protein_coding	hypo	unmutCLL_NBCB	0.67821	0.99573	0.775439	0.913067
chr19	2070165	2070245	intergenic	NA:NA-NA	NA	hypo	unmutCLL_NBCB	0.61571	0.94311	0.695682	0.8665
chr19	2139740	2139823	genebody	chr19:2100987-2164464	AP3D1;ENSG00000065000.11;protein_coding	hypo	unmutCLL_NBCB	0.7321	0.98475	0.904273	0.993889
chr19	2145337	2145469	genebody	chr19:2100987-2164464	AP3D1;ENSG00000065000.11;protein_coding	hypo	unmutCLL_NBCB	0.57935	0.98258	0.859394	0.938111
chr19	2149280	2149351	genebody	chr19:2100987-2164464	AP3D1;ENSG00000065000.11;protein_coding	hypo	unmutCLL_NBCB	0.6332	0.99256	0.906375	0.9805
chr19	2173613	2173800	genebody	chr19:2164147-2232577	DOT1L;ENSG00000104885.13;protein_coding	hypo	unmutCLL_NBCB	0.54143	0.9853	0.649512	0.976633
chr19	2173752	2173800	genebody	chr19:2164147-2232577	DOT1L;ENSG00000104885.13;protein_coding	hypo	mutCLL_MBC	0.20276	0.979417	0.31314	0.97013
chr19	2194486	2194522	genebody	chr19:2164147-2232577	DOT1L;ENSG00000104885.13;protein_coding	hypo	mutCLL_MBC	0.457937	0.992167	0.6405	0.91578
chr19	2202637	2202659	genebody	chr19:2164147-2232577	DOT1L;ENSG00000104885.13;protein_coding	hypo	unmutCLL_NBCB	0.67861	0.99311	0.7975	0.970833
chr19	2213260	2213372	genebody,promoter	chr19:2164147-2232577,chr19:2212027-2215564	AC004490.1;ENSG00000267122.1;antisense,DOT1L;ENSG00000104885.13;protein_coding	hypo	unmutCLL_NBCB	0.71036	0.9986	0.798	0.985833
chr19	2216523	2216731	genebody,promoter	chr19:2164147-2232577,chr19:2212027-2215564	AC004490.1;ENSG00000267122.1;antisense,DOT1L;ENSG00000104885.13;protein_coding	hypo	unmutCLL_NBCB	0.64935	0.99844	0.937037	0.995911
chr19	2219976	2219996	genebody,promoter	chr19:2164147-2232577,chr19:2212027-2215564	AC004490.1;ENSG00000267122.1;antisense,DOT1L;ENSG00000104885.13;protein_coding	hypo	unmutCLL_NBCB	0.67999	0.99067	0.877788	0.987111
chr19	2234599	2234682	genebody,promoter	chr19:2230001-2237703,chr19:2234060-2234148,chr19:2236519-2248678	MIR1227;ENSG00000221411.1;miRNA,PLEKHJ1;ENSG00000104886.5;protein_coding,SF3A2;ENSG00000104897.5;protein_coding	hypo	unmutCLL_NBCB	0.7403	1	0.840364	0.9495
chr19	2241508	2241545	genebody,promoter	chr19:2230001-2237703,chr19:2236519-2248678	PLEKHJ1;ENSG00000104886.5;protein_coding,SF3A2;ENSG00000104897.5;protein_coding	hypo	unmutCLL_NBCB	0.37232	0.99933	0.6855	0.928444
chr19	22979230	22979319	intergenic	NA:NA-NA	NA	hypo	unmutCLL_NBCB	0.72517	0.98122	0.9115	0.948167
chr19	2396637	2396766	genebody	chr19:2389768-2426237	TMPRSS9;ENSG00000178297.8;protein_coding	hypo	unmutCLL_NBCB	0.67365	0.9945	0.798121	0.964
chr19	24146925	24146962	intergenic	NA:NA-NA	NA	hypo	mutCLL_MBC,unmutCLL_NBCB	0.29013	0.99211	0.2877	0.98722
chr19	2547939	2547995	genebody	chr19:2511216-2702707	GNG7;ENSG00000176533.8;protein_coding	hypo	unmutCLL_NBCB	0.64827	0.98889	0.755591	0.894
chr19	2550381	2550514	genebody	chr19:2511216-2702707	GNG7;ENSG00000176533.8;protein_coding	hypo	unmutCLL_NBCB	0.73233	0.99428	0.881018	0.974
chr19	2550842	2550896	genebody	chr19:2511216-2702707	GNG7;ENSG00000176533.8;protein_coding	hypo	unmutCLL_NBCB	0.71458	0.99033	0.888667	0.952833
chr19	2555606	2555682	genebody	chr19:2511216-2702707	GNG7;ENSG00000176533.8;protein_coding	hypo	mutCLL_MBC	0.204	0.969833	0.35397	0.87167
chr19	2685906	2685952	genebody	chr19:2511216-2702707	GNG7;ENSG00000176533.8;protein_coding	hypo	unmutCLL_NBCB	0.70875	0.99256	0.911111	0.944556
chr19	2759333	2759416	genebody	chr19:2754711-2783369	SGTA;ENSG00000104969.5;protein_coding	hypo	unmutCLL_NBCB	0.47498	0.96444	0.736682	0.9565
chr19	30101232	30101246	genebody	chr19:30094923-30108144	POP4;ENSG00000105171.5;protein_coding	hypo	unmutCLL_NBCB	0.41058	0.99478	0.769318	0.9825
chr19	30162306	30162351	genebody	chr19:30155962-30166364	PLEKHF1;ENSG00000166289.5;protein_coding	hypo	mutCLL_MBC,unmutCLL_NBCB	0.12635	0.85511	0.47885	0.79856
chr19	3053358	3053413	genebody,promoter	chr19:3052907-3053722,chr19:3052907-3063105	AC005944.2;ENSG00000267469.1;antisense,AES;ENSG00000104964.10;protein_coding	hypo	unmutCLL_NBCB	0.29983	0.98273	0.394292	0.91475
chr19	3053358	3053460	genebody,promoter	chr19:3052907-3053722,chr19:3052907-3063105	AC005944.2;ENSG00000267469.1;antisense,AES;ENSG00000104964.10;protein_coding	hypo	mutCLL_MBC	0.30754	0.982733	0.41795	0.83917
chr19	30637290	30637400	intergenic	NA:NA-NA	NA	hypo	unmutCLL_NBCB	0.70107	0.988	0.772773	0.932667
chr19	30824642	30824720	genebody	chr19:30719196-31204445	ZNF536;ENSG00000198597.4;protein_coding	hypo	unmutCLL_NBCB	0.72489	0.97933	0.957591	0.986833
chr19	308426	308467	genebody	chr19:305574-344798	MIER2;ENSG00000105556.6;protein_coding	hypo	unmutCLL_NBCB	0.71887	0.99958	0.869	0.998111
chr19	31339149	31339214	promoter	chr19:31341881-31363414	CTC-400I9.2;ENSG00000267081.1;lincRNA	hypo	unmutCLL_NBCB	0.6931	0.98	0.7953	0.933167
chr19	31727913	31727978	intergenic	NA:NA-NA	NA	hypo	mutCLL_MBC,unmutCLL_NBCB	0.67927	0.99533	0.56743	0.84478
chr19	3193330	3193352	genebody	chr19:3185560-3209573	NCLN;ENSG00000125912.6;protein_coding	hypo	unmutCLL_NBCB	0.64412	0.99578	0.983667	0.9955
chr19	33133967	33134036	genebody	chr19:33087912-33167503	ANKRD27;ENSG00000105186.10;protein_coding	hypo	mutCLL_MBC	0.872667	0.992444	0.64744	0.99725
chr19	3339622	3339682	intergenic	NA:NA-NA	NA	hypo	unmutCLL_NBCB	0.73599	0.994	0.860182	0.877
chr19	34246473	34246562	genebody	chr19:34112860-34264414	CHST8;ENSG00000124302.8;protein_coding	hypo	unmutCLL_NBCB	0.66197	0.94989	0.77803	0.898667
chr19	34254571	34254604	genebody	chr19:34112860-34264414	CHST8;ENSG00000124302.8;protein_coding	hypo	unmutCLL_NBCB	0.725	0.97756	0.862773	0.844833
chr19	34451223	34451360	intergenic	NA:NA-NA	NA	hypo	unmutCLL_NBCB	0.64256	0.97022	0.697886	0.962667
chr19	34911054	34911190	genebody,promoter	chr19:34895288-34917073,chr19:34912920-34913216	PDCD2L;ENSG00000126249.3;protein_coding,RN7SL154P;ENSG00000264317.1;misc_RNA	hypo	unmutCLL_NBCB	0.61896	0.99739	0.851527	0.980267
chr19	35568403	35568455	genebody	chr19:35549962-35597208	HPN-AS1;ENSG00000227392.1;antisense	hypo	unmutCLL_NBCB	0.43395	0.99522	0.716091	0.9585
chr19	35624969	35625084	genebody,promoter	chr19:35615416-35633355,chr19:35629711-35634013,chr19:35629727-35642239	CTD-2527I21.4;ENSG00000221857.3;processed_transcript,FXYD1;ENSG00000266964.1;protein_coding,LGI4;ENSG00000153902.9;protein_coding	hypo	unmutCLL_NBCB	0.58061	0.98211	0.470091	0.921833
chr19	35624969	35625097	genebody,promoter	chr19:35615416-35633355,chr19:35629711-35634013,chr19:35629727-35642239	CTD-2527I21.4;ENSG00000221857.3;processed_transcript,FXYD1;ENSG00000266964.1;protein_coding,LGI4;ENSG00000153902.9;protein_coding	hypo	mutCLL_MBC	0.528533	0.982111	0.6793	0.93258
chr19	3586645	3586697	promoter	chr19:3585550-3593539	GIPC3;ENSG00000179855.5;protein_coding	hypo	unmutCLL_NBCB	0.56142	0.9164	0.707159	0.880583
chr19	36082733	36082906	intergenic	NA:NA-NA	NA	hypo	unmutCLL_NBCB	0.73771	0.99244	0.876183	0.923167
chr19	36210166	36210186	promoter	chr19:36208920-36229779	KMT2B;ENSG00000105663.10;processed_transcript,KMT2B;ENSG00000272333.1;protein_coding	hypo	unmutCLL_NBCB	0.67485	0.99722	0.621875	0.869833
chr19	36399037	36399135	promoter	chr19:36395302-36399197	TYROBP;ENSG00000011600.7;protein_coding	hypo	mutCLL_MBC,unmutCLL_NBCB	0.33337	0.72644	0.55714	0.86211
chr19	36426414	36426478	promoter	chr19:36426259-36436669	LRFN3;ENSG00000126243.4;protein_coding	hypo	unmutCLL_NBCB	0.6144	0.87989	0.714864	0.845167
chr19	3660855	3660979	genebody	chr19:3630180-3700477	PIP5K1C;ENSG00000186111.4;protein_coding	hypo	unmutCLL_NBCB	0.6049	0.99922	0.740939	0.9435
chr19	36670490	36670523	intergenic	NA:NA-NA	NA	hypo	unmutCLL_NBCB	0.7382	0.99211	0.769545	0.946333
chr19	3689501	3689570	genebody	chr19:3630180-3700477	PIP5K1C;ENSG00000186111.4;protein_coding	hypo	unmutCLL_NBCB	0.68634	0.99425	0.799233	0.955889
chr19	3754213	3754302	genebody,promoter	chr19:3750816-3761697,chr19:3753837-3756515,chr19:3754617-3756657	AC005954.3;ENSG00000267138.1;sense_intronic,AC005954.4;ENSG00000267205.1;antisense,APBA3;ENSG00000011132.7;protein_coding	hypo	unmutCLL_NBCB	0.68532	0.99506	0.859303	0.9836
chr19	38369958	38370015	intergenic	NA:NA-NA	NA	hypo	mutCLL_MBC,unmutCLL_NBCB	0.50684	0.99992	0.50649	0.98267
chr19	38553508	38553607	genebody	chr19:38397867-38699012	SIPA1L3;ENSG00000105738.6;protein_coding	hypo	unmutCLL_NBCB	0.60558	0.99722	0.789	0.907778
chr19	38553909	38554043	genebody	chr19:38397867-38699012	SIPA1L3;ENSG00000105738.6;protein_coding	hypo	unmutCLL_NBCB	0.70645	0.9794	0.753667	0.96975
chr19	38693082	38693097	genebody,promoter	chr19:38397867-38699012,chr19:38690873-38691170	RN7SL663P;ENSG00000266428.1;misc_RNA,SIPA1L3;ENSG00000105738.6;protein_coding	hypo	unmutCLL_NBCB	0.73873	0.99311	0.771318	0.987
chr19	39070842	39070886	genebody	chr19:38924338-39078204	RYR1;ENSG00000196218.7;protein_coding	hypo	unmutCLL_NBCB	0.58425	0.98856	0.86425	0.938667
chr19	39073656	39073673	genebody	chr19:38924338-39078204	RYR1;ENSG00000196218.7;protein_coding	hypo	unmutCLL_NBCB	0.68349	0.99611	0.9309	0.9755
chr19	39153695	39153738	genebody	chr19:39138288-39222223	ACTN4;ENSG00000130402.7;protein_coding	hypo	mutCLL_MBC	0.282944	0.993	0.37745	0.96711
chr19	39153695	39153758	genebody	chr19:39138288-39222223	ACTN4;ENSG00000130402.7;protein_coding	hypo	unmutCLL_NBCB	0.31733	0.99517	0.349394	0.967111
chr19	39154139	39154251	genebody	chr19:39138288-39222223	ACTN4;ENSG00000130402.7;protein_coding	hypo	unmutCLL_NBCB	0.7174	0.99587	0.849409	0.975667
chr19	39191973	39192052	genebody	chr19:39138288-39222223	ACTN4;ENSG00000130402.7;protein_coding	hypo	mutCLL_MBC	0.309944	0.999	0.65809	0.95322
chr19	39358745	39358811	genebody,promoter	chr19:39358469-39368919,chr19:39360798-39364403	CTC-360G5.6;ENSG00000269050.1;antisense,RINL;ENSG00000187994.9;protein_coding	hypo	unmutCLL_NBCB	0.71353	0.99256	0.671273	0.944333
chr19	39399563	39399621	genebody	chr19:39399619-39402798	CTC-360G5.1;ENSG00000262484.1;protein_coding	hypo	unmutCLL_NBCB	0.70333	0.99378	0.823136	0.984833
chr19	39523971	39524036	promoter	chr19:39481353-39523425	FBXO27;ENSG00000161243.4;protein_coding	hypo	mutCLL_MBC	0.238524	0.995	0.56844	0.90822
chr19	39827573	39827621	genebody	chr19:39818992-39833012	GMFG;ENSG00000130755.8;protein_coding	hypo	mutCLL_MBC	0.3329	0.9775	0.67388	0.998
chr19	39915803	39915841	genebody,promoter	chr19:39903224-39919054,chr19:39916574-39919055	CTB-60E11.4;ENSG00000269410.1;lincRNA,PLEKHG2;ENSG00000090924.10;protein_coding	hypo	unmutCLL_NBCB	0.62749	0.95989	0.904917	0.980333
chr19	4093543	4093664	genebody	chr19:4090318-4124126	MAP2K2;ENSG00000126934.9;protein_coding	hypo	mutCLL_MBC	0.519067	0.995444	0.59177	0.93383
chr19	4102527	4102600	genebody	chr19:4090318-4124126	MAP2K2;ENSG00000126934.9;protein_coding	hypo	unmutCLL_NBCB	0.6963	0.992	0.840608	0.966917
chr19	4103191	4103218	genebody	chr19:4090318-4124126	MAP2K2;ENSG00000126934.9;protein_coding	hypo	unmutCLL_NBCB	0.63312	0.96778	0.828909	0.888667
chr19	4123929	4123957	promoter	chr19:4090318-4124126	MAP2K2;ENSG00000126934.9;protein_coding	hyper	unmutCLL_NBCB	0.47244	0.018524	0.388217	0.0216667
chr19	4123935	4123957	promoter	chr19:4090318-4124126	MAP2K2;ENSG00000126934.9;protein_coding	hyper	mutCLL_MBC	0.5383	0.0194	0.38245	0.022556
chr19	41298844	41298976	genebody	chr19:41284120-41302847,chr19:41284146-41314103	RAB4B-EGLN2;ENSG00000171570.6;protein_coding,RAB4B;ENSG00000167578.12;protein_coding	hypo	unmutCLL_NBCB	0.47355	0.99962	0.648095	0.979857
chr19	41298855	41298884	genebody	chr19:41284120-41302847,chr19:41284146-41314103	RAB4B-EGLN2;ENSG00000171570.6;protein_coding,RAB4B;ENSG00000167578.12;protein_coding	hypo	mutCLL_MBC	0.2365	0.9985	0.45333	0.96133
chr19	4138871	4138931	intergenic	NA:NA-NA	NA	hypo	unmutCLL_NBCB	0.58883	0.98756	0.844682	0.9085
chr19	42202384	42202397	genebody	chr19:42177234-42210895	CEACAM7;ENSG00000007306.10;protein_coding	hypo	unmutCLL_NBCB	0.63897	0.94033	0.930682	0.990167
chr19	42409352	42409406	genebody	chr19:42387227-42434302	ARHGEF1;ENSG00000076928.13;protein_coding	hypo	unmutCLL_NBCB	0.68266	0.99933	0.850273	0.951556
chr19	42414104	42414138	genebody,promoter	chr19:42387227-42434302,chr19:42412670-42414217	ARHGEF1;ENSG00000076928.13;protein_coding,CTD-2575K13.6;ENSG00000268041.1;pseudogene	hypo	unmutCLL_NBCB	0.63787	0.96222	0.851591	0.9095
chr19	42639926	42639994	genebody,promoter	chr19:42590262-42700737,chr19:42636706-42641251,chr19:42637596-42637665	CTC-378H22.1;ENSG00000254887.1;antisense,MIR4323;ENSG00000266226.1;miRNA,POU2F2;ENSG00000028277.16;protein_coding	hypo	mutCLL_MBC,unmutCLL_NBCB	0.55524	0.88442	0.53605	0.8715
chr19	42794525	42794553	genebody	chr19:42772688-42799949	CIC;ENSG00000079432.3;protein_coding	hypo	unmutCLL_NBCB	0.60663	0.96356	0.667222	0.956167
chr19	42935080	42935149	genebody,promoter	chr19:42901279-43156507,chr19:42905658-42931578,chr19:42932439-42947200	CXCL17;ENSG00000189377.4;protein_coding,LIPE-AS1;ENSG00000213904.4;antisense,LIPE;ENSG00000079435.5;protein_coding	hypo	mutCLL_MBC	0.7415	0.998833	0.58988	0.92778
chr19	4361004	4361062	genebody,promoter	chr19:4356633-4358445,chr19:4360366-4400544,chr19:4363785-4364637	AC007292.3;ENSG00000269318.1;antisense,AC007292.6;ENSG00000267980.1;antisense,SH3GL1;ENSG00000141985.5;protein_coding	hypo	mutCLL_MBC,unmutCLL_NBCB	0.6093	0.99783	0.58587	0.95925
chr19	4431370	4431420	genebody,promoter	chr19:4402658-4445015,chr19:4429685-4430931	CHAF1A;ENSG00000167670.11;protein_coding,CTB-50L17.5;ENSG00000267255.1;antisense	hypo	unmutCLL_NBCB	0.61852	0.99617	0.778033	0.910333
chr19	4432897	4432947	genebody,promoter	chr19:4402658-4445015,chr19:4429685-4430931	CHAF1A;ENSG00000167670.11;protein_coding,CTB-50L17.5;ENSG00000267255.1;antisense	hypo	mutCLL_MBC,unmutCLL_NBCB	0.1947	0.99111	0.30419	0.88622
chr19	45403968	45404057	genebody,promoter	chr19:45393825-45406946,chr19:45409010-45412650	APOE;ENSG00000130203.5;protein_coding,TOMM40;ENSG00000130204.8;protein_coding	hypo	unmutCLL_NBCB	0.71028	0.992	0.751242	0.971
chr19	45493835	45493928	genebody	chr19:45457841-45496599	CLPTM1;ENSG00000104853.11;protein_coding	hypo	unmutCLL_NBCB	0.32176	0.9965	0.62575	0.891111
chr19	46281799	46281871	genebody	chr19:46272974-46285810	DMPK;ENSG00000104936.13;protein_coding	hypo	unmutCLL_NBCB	0.6738	0.99724	0.895127	0.979667
chr19	4640893	4640967	promoter	chr19:4639529-4655580	TNFAIP8L1;ENSG00000185361.4;protein_coding	hypo	unmutCLL_NBCB	0.72383	1	0.845375	0.98
chr19	46513554	46513637	genebody	chr19:46498338-46524576	CCDC61;ENSG00000104983.4;protein_coding	hypo	unmutCLL_NBCB	0.69387	0.99811	0.87245	0.992333
chr19	4666803	4666921	genebody	chr19:4641385-4670382	C19orf10;ENSG00000074842.3;protein_coding	hypo	unmutCLL_NBCB	0.5381	0.99578	0.810091	0.957667
chr19	47118861	47118918	promoter	chr19:47112533-47114036	CTB-12A17.3;ENSG00000269292.1;antisense	hypo	unmutCLL_NBCB	0.73512	0.99789	0.853611	0.964667
chr19	47125240	47125299	genebody	chr19:47123724-47128375	PTGIR;ENSG00000160013.4;protein_coding	hypo	unmutCLL_NBCB	0.67795	0.99208	0.853727	0.924111
chr19	47329851	47329917	intergenic	NA:NA-NA	NA	hypo	unmutCLL_NBCB	0.73719	0.99867	0.7841	0.944167
chr19	4884094	4884219	intergenic	NA:NA-NA	NA	hypo	mutCLL_MBC,unmutCLL_NBCB	0.4337	0.97544	0.65055	0.91144
chr19	48902548	48902587	genebody	chr19:48898131-48948188	GRIN2D;ENSG00000105464.3;protein_coding	hypo	mutCLL_MBC,unmutCLL_NBCB	0.55463	0.98883	0.5151	0.98608
chr19	48977829	48977876	genebody,promoter	chr19:48968849-48972950,chr19:48972288-48985571	CTC-273B12.5;ENSG00000268530.1;antisense,CYTH2;ENSG00000105443.9;protein_coding	hypo	unmutCLL_NBCB	0.7164	0.99756	0.857955	0.927667
chr19	48981761	48981796	genebody,promoter	chr19:48972288-48985571,chr19:48983103-48985571	CTC-273B12.8;ENSG00000269751.1;lincRNA,CYTH2;ENSG00000105443.9;protein_coding	hypo	unmutCLL_NBCB	0.69934	0.99078	0.853	0.9895
chr19	49096360	49096480	genebody	chr19:49055331-49102682	SULT2B1;ENSG00000088002.7;protein_coding	hypo	unmutCLL_NBCB	0.72631	0.99567	0.893682	0.936
chr19	49135680	49135812	genebody	chr19:49133286-49140695	DBP;ENSG00000105516.6;protein_coding	hypo	unmutCLL_NBCB	0.63605	1	0.754095	0.976333
chr19	49155752	49155855	genebody	chr19:49141327-49184424	SEC1P;ENSG00000232871.4;pseudogene	hypo	unmutCLL_NBCB	0.6534	0.95667	0.799614	0.9385
chr19	49459016	49459060	promoter	chr19:49458071-49465055	BAX;ENSG00000087088.15;protein_coding	hypo	unmutCLL_NBCB	0.73309	0.98467	0.853444	0.974667
chr19	49459499	49459545	promoter	chr19:49458071-49465055	BAX;ENSG00000087088.15;protein_coding	hypo	mutCLL_MBC	0.7017	0.998667	0.74106	0.99178
chr19	49491180	49491217	genebody	chr19:49471381-49496567	GYS1;ENSG00000104812.10;protein_coding	hypo	unmutCLL_NBCB	0.5694	0.99667	0.854219	0.996833
chr19	49494656	49494711	promoter	chr19:49471381-49496567,chr19:49496704-49519252	GYS1;ENSG00000104812.10;protein_coding,RUVBL2;ENSG00000183207.8;protein_coding	hypo	unmutCLL_NBCB	0.64799	0.98078	0.909841	0.9795
chr19	49709797	49709990	genebody	chr19:49660997-49715093	TRPM4;ENSG00000130529.11;protein_coding	hypo	unmutCLL_NBCB	0.64698	0.98858	0.853087	0.958333
chr19	49713283	49713322	genebody	chr19:49660997-49715093	TRPM4;ENSG00000130529.11;protein_coding	hypo	unmutCLL_NBCB	0.58183	0.993	0.8768	0.986333
chr19	49714932	49714988	genebody	chr19:49660997-49715093	TRPM4;ENSG00000130529.11;protein_coding	hypo	unmutCLL_NBCB	0.71437	0.99556	0.898455	0.94
chr19	49748312	49748319	intergenic	NA:NA-NA	NA	hypo	mutCLL_MBC,unmutCLL_NBCB	0.68997	0.98567	0.58907	0.85033
chr19	49804032	49804105	genebody	chr19:49792894-49828482	SLC6A16;ENSG00000063127.11;protein_coding	hypo	unmutCLL_NBCB	0.70768	0.99933	0.8387	0.91
chr19	49863134	49863142	genebody,promoter	chr19:49843851-49865714,chr19:49865039-49878373	DKKL1;ENSG00000104901.2;protein_coding,TEAD2;ENSG00000074219.9;protein_coding	hypo	mutCLL_MBC,unmutCLL_NBCB	0.62803	0.99756	0.63618	0.95856
chr19	49954519	49954576	promoter	chr19:49949554-49956754,chr19:49956425-49974305	ALDH16A1;ENSG00000161618.5;protein_coding,PIH1D1;ENSG00000104872.6;protein_coding	hyper	unmutCLL_NBCB	0.7181	0.079111	0.5624	0.0633333
chr19	50046448	50046512	genebody	chr19:50030874-50050219	RCN3;ENSG00000142552.3;protein_coding	hypo	unmutCLL_NBCB	0.50093	0.98894	0.67975	0.9486
chr19	50056398	50056452	intergenic	NA:NA-NA	NA	hypo	mutCLL_MBC,unmutCLL_NBCB	0.45594	0.99689	0.62732	0.98433
chr19	50062122	50062163	genebody	chr19:50058967-50093519	NOSIP;ENSG00000142546.9;protein_coding	hypo	mutCLL_MBC,unmutCLL_NBCB	0.20304	0.99622	0.46373	0.97589
chr19	5011642	5011716	genebody	chr19:4969124-5153606	KDM4B;ENSG00000127663.10;protein_coding	hypo	unmutCLL_NBCB	0.72186	0.99311	0.914909	0.932667
chr19	50187572	50187611	genebody,promoter	chr19:50179042-50192286,chr19:50185327-50185411,chr19:50191920-50193832	ADM5;ENSG00000224420.3;protein_coding,MIR5088;ENSG00000264413.1;miRNA,PRMT1;ENSG00000126457.16;protein_coding	hypo	unmutCLL_NBCB	0.73305	0.98733	0.660188	0.941333
chr19	50190512	50190659	genebody,promoter	chr19:50179042-50192286,chr19:50191920-50193832,chr19:50194154-50216988	ADM5;ENSG00000224420.3;protein_coding,CPT1C;ENSG00000169169.10;protein_coding,PRMT1;ENSG00000126457.16;protein_coding	hypo	unmutCLL_NBCB	0.48564	0.99281	0.756403	0.985556
chr19	50190645	50190659	genebody,promoter	chr19:50179042-50192286,chr19:50191920-50193832,chr19:50194154-50216988	ADM5;ENSG00000224420.3;protein_coding,CPT1C;ENSG00000169169.10;protein_coding,PRMT1;ENSG00000126457.16;protein_coding	hypo	mutCLL_MBC	0.197	0.996833	0.52659	0.99567
chr19	50402972	50403102	genebody	chr19:50392910-50432796	IL4I1;ENSG00000104951.11;protein_coding	hypo	unmutCLL_NBCB	0.72698	0.99793	0.802	0.982333
chr19	5041815	5041886	genebody	chr19:4969124-5153606	KDM4B;ENSG00000127663.10;protein_coding	hypo	unmutCLL_NBCB	0.71527	0.96775	0.866958	0.921889
chr19	50419879	50419912	genebody	chr19:50392910-50432796,chr19:50410081-50433020,chr19:50412757-50461648	CTC-326K19.6;ENSG00000269179.1;protein_coding,IL4I1;ENSG00000104951.11;protein_coding,NUP62;ENSG00000213024.6;protein_coding	hypo	unmutCLL_NBCB	0.53918	1	0.89725	0.9825
chr19	50423992	50424106	genebody	chr19:50392910-50432796,chr19:50410081-50433020,chr19:50412757-50461648	CTC-326K19.6;ENSG00000269179.1;protein_coding,IL4I1;ENSG00000104951.11;protein_coding,NUP62;ENSG00000213024.6;protein_coding	hypo	mutCLL_MBC,unmutCLL_NBCB	0.29606	0.99929	0.62556	0.95513
chr19	5086283	5086387	genebody	chr19:4969124-5153606	KDM4B;ENSG00000127663.10;protein_coding	hypo	unmutCLL_NBCB	0.59959	0.99081	0.886767	0.9755
chr19	51060798	51060849	genebody,promoter	chr19:51020148-51071302,chr19:51058626-51061226	CTD-2560K21.6;ENSG00000268231.1;sense_intronic,LRRC4B;ENSG00000131409.8;protein_coding	hypo	unmutCLL_NBCB	0.51745	0.779	0.596864	0.726
chr19	51274699	51274733	promoter	chr19:51273720-51274989	GPR32;ENSG00000142511.4;protein_coding	hypo	unmutCLL_NBCB	0.67203	0.92433	0.7955	0.897833
chr19	51378913	51378926	genebody,promoter	chr19:51364823-51383823,chr19:51377551-51378040	AC037199.1;ENSG00000267880.1;protein_coding,KLK2;ENSG00000167751.8;protein_coding	hypo	unmutCLL_NBCB	0.4386	0.98811	0.634786	0.954167
chr19	51469637	51469670	genebody,promoter	chr19:51461886-51472929,chr19:51471465-51515385	CTB-147C22.9;ENSG00000267879.1;antisense,KLK6;ENSG00000167755.9;protein_coding	hypo	unmutCLL_NBCB	0.64532	0.97333	0.839	0.9055
chr19	5205512	5205581	genebody	chr19:5158505-5340814	PTPRS;ENSG00000105426.10;protein_coding	hypo	unmutCLL_NBCB	0.58358	0.84813	0.596015	0.892667
chr19	5205522	5205581	genebody	chr19:5158505-5340814	PTPRS;ENSG00000105426.10;protein_coding	hypo	mutCLL_MBC	0.583074	0.843333	0.60435	0.9145
chr19	5320012	5320286	genebody	chr19:5158505-5340814	PTPRS;ENSG00000105426.10;protein_coding	hypo	unmutCLL_NBCB	0.35711	0.93549	0.770442	0.918095
chr19	5320245	5320286	genebody	chr19:5158505-5340814	PTPRS;ENSG00000105426.10;protein_coding	hypo	mutCLL_MBC	0.21585	0.759667	0.57867	0.82989
chr19	535546	535566	genebody	chr19:531713-542097	CDC34;ENSG00000099804.4;protein_coding	hypo	unmutCLL_NBCB	0.67053	0.98711	0.6357	0.980833
chr19	55785835	55785937	genebody	chr19:55773598-55791749	HSPBP1;ENSG00000133265.6;protein_coding	hypo	mutCLL_MBC	0.640514	0.995417	0.647	0.958
chr19	55785835	55785950	genebody	chr19:55773598-55791749	HSPBP1;ENSG00000133265.6;protein_coding	hypo	unmutCLL_NBCB	0.65636	0.9965	0.639193	0.958
chr19	56613314	56613351	genebody,promoter	chr19:56598731-56632649,chr19:56616784-56616879	Y_RNA;ENSG00000223060.1;misc_RNA,ZNF787;ENSG00000142409.4;protein_coding	hypo	unmutCLL_NBCB	0.69076	0.96078	0.775227	0.939667
chr19	577556	577569	genebody	chr19:571296-583493	BSG;ENSG00000172270.14;protein_coding	hypo	mutCLL_MBC	0.06775	0.979167	0.13706	0.85356
chr19	58285303	58285372	genebody	chr19:58281022-58331307	ZNF586;ENSG00000083828.11;protein_coding	hypo	unmutCLL_NBCB	0.72447	0.99589	0.708682	0.959833
chr19	5964078	5964174	genebody	chr19:5916149-5978153	RANBP3;ENSG00000031823.10;protein_coding	hypo	unmutCLL_NBCB	0.6579	0.99678	0.879136	0.931167
chr19	5995282	5995330	genebody	chr19:5978413-6020374,chr19:5993174-6199583	CTC-232P5.1;ENSG00000266983.1;antisense,RFX2;ENSG00000087903.8;protein_coding	hypo	unmutCLL_NBCB	0.71138	0.99256	0.703682	0.951167
chr19	6092984	6093007	genebody	chr19:5993174-6199583	RFX2;ENSG00000087903.8;protein_coding	hypo	unmutCLL_NBCB	0.63285	0.98278	0.8682	0.970167
chr19	615460	615469	genebody,promoter	chr19:589892-617159,chr19:615885-617159	AC005559.2;ENSG00000266939.1;antisense,HCN2;ENSG00000099822.2;protein_coding	hypo	unmutCLL_NBCB	0.52219	0.99244	0.8645	0.9825
chr19	618473	618704	genebody,promoter	chr19:615885-617159,chr19:617222-633597,chr19:623518-623982	AC005559.2;ENSG00000266939.1;antisense,LLNLR-299G3.1;ENSG00000272448.1;antisense,POLRMT;ENSG00000099821.9;protein_coding	hypo	mutCLL_MBC	0.3819	0.989976	0.67246	0.97515
chr19	618473	618717	genebody,promoter	chr19:615885-617159,chr19:617222-633597,chr19:623518-623982	AC005559.2;ENSG00000266939.1;antisense,LLNLR-299G3.1;ENSG00000272448.1;antisense,POLRMT;ENSG00000099821.9;protein_coding	hypo	unmutCLL_NBCB	0.40043	0.99376	0.670047	0.971244
chr19	6996204	6996246	intergenic	NA:NA-NA	NA	hypo	unmutCLL_NBCB	0.6538	0.97711	0.909864	0.961333
chr19	7180991	7181043	genebody	chr19:7112265-7294045	INSR;ENSG00000171105.9;protein_coding	hypo	unmutCLL_NBCB	0.64507	0.99133	0.816485	0.985222
chr19	7535489	7535546	genebody	chr19:7459998-7537363	ARHGEF18;ENSG00000104880.13;protein_coding	hypo	mutCLL_MBC	0.14502	0.988333	0.51716	0.9786
chr19	7535489	7535556	genebody	chr19:7459998-7537363	ARHGEF18;ENSG00000104880.13;protein_coding	hypo	unmutCLL_NBCB	0.14887	0.99161	0.55927	0.9786
chr19	7711997	7712538	genebody	chr19:7701766-7712759	STXBP2;ENSG00000076944.10;protein_coding	hypo	unmutCLL_NBCB	0.41316	0.99847	0.518621	0.987139
chr19	7712051	7712194	genebody	chr19:7701766-7712759	STXBP2;ENSG00000076944.10;protein_coding	hypo	mutCLL_MBC	0.230249	0.998067	0.37901	0.98433
chr19	7712242	7712371	genebody	chr19:7701766-7712759	STXBP2;ENSG00000076944.10;protein_coding	hypo	mutCLL_MBC	0.512359	0.997833	0.7196	0.99213
chr19	7750928	7751057	intergenic	NA:NA-NA	NA	hypo	unmutCLL_NBCB	0.71977	0.98608	0.789639	0.957889
chr19	7769111	7769153	promoter	chr19:7753643-7767032	FCER2;ENSG00000104921.10;protein_coding	hypo	unmutCLL_NBCB	0.63332	0.98958	0.760121	0.979889
chr19	7777007	7777049	intergenic	NA:NA-NA	NA	hypo	mutCLL_MBC,unmutCLL_NBCB	0.083233	0.949	0.20081	0.92622
chr19	7787832	7787917	intergenic	NA:NA-NA	NA	hypo	unmutCLL_NBCB	0.74388	0.99489	0.782364	0.933267
chr19	795558	795602	promoter	chr19:797074-812327	PTBP1;ENSG00000011304.12;protein_coding	hypo	unmutCLL_NBCB	0.51563	0.97667	0.7908	0.861667
chr19	8082588	8082725	intergenic	NA:NA-NA	NA	hypo	unmutCLL_NBCB	0.4525	0.98593	0.653127	0.928167
chr19	8262766	8262850	intergenic	NA:NA-NA	NA	hypo	unmutCLL_NBCB	0.67763	0.99808	0.832697	0.950333
chr19	8475294	8475348	promoter	chr19:8478153-8503901	MARCH2;ENSG00000099785.6;protein_coding	hypo	unmutCLL_NBCB	0.71398	0.99275	0.692545	0.978444
chr19	930287	930359	genebody,promoter	chr19:925780-975939,chr19:928256-928817	AC005391.2;ENSG00000267159.1;antisense,ARID3A;ENSG00000116017.6;protein_coding	hypo	unmutCLL_NBCB	0.73862	0.99183	0.878939	0.954111
chr19	946074	946152	genebody	chr19:925780-975939	ARID3A;ENSG00000116017.6;protein_coding	hypo	unmutCLL_NBCB	0.46327	0.97247	0.609503	0.918333
chr2	10198864	10198948	genebody,promoter	chr2:10194547-10194993,chr2:10196906-10221071	CYS1;ENSG00000205795.4;protein_coding,RP11-254F7.3;ENSG00000271787.1;antisense	hypo	unmutCLL_NBCB	0.6959	0.97422	0.800591	0.935
chr2	105276094	105276116	promoter	chr2:105275794-105281295	AC013402.5;ENSG00000230690.1;lincRNA	hypo	unmutCLL_NBCB	0.66417	0.91833	0.730818	0.856
chr2	105556415	105556504	genebody	chr2:105552868-105654954	AC010884.1;ENSG00000224509.1;antisense	hypo	unmutCLL_NBCB	0.67481	0.98427	0.669379	0.969
chr2	10582223	10582293	genebody	chr2:10580093-10588630	ODC1;ENSG00000115758.8;protein_coding	hypo	mutCLL_MBC,unmutCLL_NBCB	0.13111	0.9966	0.69653	0.99007
chr2	110353680	110353731	genebody	chr2:110300558-110371783,chr2:110352269-110363275	AC011753.5;ENSG00000230696.1;sense_intronic,SEPT10;ENSG00000186522.10;protein_coding	hypo	unmutCLL_NBCB	0.27159	0.99578	0.556071	0.925
chr2	113890401	113890441	genebody	chr2:113864790-113891593	IL1RN;ENSG00000136689.14;protein_coding	hypo	unmutCLL_NBCB	0.65097	0.986	0.8787	0.943667
chr2	11415241	11415274	genebody	chr2:11319886-11488456	ROCK2;ENSG00000134318.9;protein_coding	hypo	mutCLL_MBC	0.3751	0.980667	0.46409	0.98867
chr2	115954689	115954764	genebody	chr2:115199875-116603328	DPP10;ENSG00000175497.12;protein_coding	hypo	unmutCLL_NBCB	0.68427	0.98411	0.759455	0.925333
chr2	116901917	116902002	intergenic	NA:NA-NA	NA	hypo	mutCLL_MBC,unmutCLL_NBCB	0.4885	0.95522	0.45109	0.76544
chr2	118274544	118274585	intergenic	NA:NA-NA	NA	hypo	mutCLL_MBC	0.76795	0.9965	0.67062	0.99822
chr2	119613447	119613465	intergenic	NA:NA-NA	NA	hyper	mutCLL_MBC	0.35335	0.0621667	0.37882	0.11733
chr2	119613447	119613497	intergenic	NA:NA-NA	NA	hyper	unmutCLL_NBCB	0.3502	0.052533	0.313273	0.127167
chr2	11989856	11989924	promoter	chr2:11988747-12718474	AC096559.1;ENSG00000224184.1;lincRNA	hypo	unmutCLL_NBCB	0.55526	0.85111	0.82525	0.987167
chr2	121038883	121038953	genebody	chr2:120997639-121052289	RALB;ENSG00000144118.9;protein_coding	hypo	unmutCLL_NBCB	0.67765	0.99	0.703273	0.9595
chr2	121097073	121097135	intergenic	NA:NA-NA	NA	hypo	unmutCLL_NBCB	0.64839	0.98533	0.860682	0.950133
chr2	121429000	121429066	intergenic	NA:NA-NA	NA	hypo	unmutCLL_NBCB	0.6162	0.99589	0.8607	0.895833
chr2	121542825	121542853	genebody	chr2:121493198-121750229	GLI2;ENSG00000074047.16;protein_coding	hypo	unmutCLL_NBCB	0.6402	0.98144	0.66495	0.8685
chr2	125074102	125074237	genebody	chr2:124782863-125672864	CNTNAP5;ENSG00000155052.14;protein_coding	hypo	unmutCLL_NBCB	0.71337	0.97642	0.737227	0.942111
chr2	125185124	125185193	genebody	chr2:124782863-125672864	CNTNAP5;ENSG00000155052.14;protein_coding	hypo	unmutCLL_NBCB	0.73493	0.99467	0.753439	0.951333
[truncated: 1,755 more rows]

## Sheet: B cell related
Supplementary Table 2: B cell related DMRs
chr	start	end	type	position	gene	DMR	comparison	CLL_unmutated	naiBC	CLL_mutated	memBC
chr1	100091523	100091577	intergenic	NA:NA-NA	NA	hypo	unmutCLL_NBCB	0.571	0.94589	0.545455	0.686833
chr1	10009182	10009293	genebody,promoter	chr1:10002980-10010032,chr1:10003485-10045559,chr1:10007375-10007694	NMNAT1;ENSG00000173614.9;protein_coding,RN7SKP269;ENSG00000202415.1;misc_RNA,RP11-84A14.4;ENSG00000228150.1;sense_intronic	hypo	unmutCLL_NBCB	0.44376	0.99348	0.600182	0.947722
chr1	1007617	1007729	promoter	chr1:1006345-1009687	RNF223;ENSG00000237330.2;protein_coding	hypo	unmutCLL_NBCB	0.63727	0.94641	0.655731	0.64175
chr1	100816604	100816663	genebody	chr1:100810583-100985833	CDC14A;ENSG00000079335.13;protein_coding	hypo	unmutCLL_NBCB	0.37522	0.7432	0.466303	0.48925
chr1	10083242	10083301	intergenic	NA:NA-NA	NA	hypo	unmutCLL_NBCB	0.65813	0.97778	0.655727	0.769833
chr1	100988908	100989029	intergenic	NA:NA-NA	NA	hypo	unmutCLL_NBCB	0.20544	0.98827	0.415947	0.8245
chr1	100988917	100989000	intergenic	NA:NA-NA	NA	hypo	mutCLL_MBC	0.2032	0.993833	0.34976	0.80467
chr1	101705630	101705825	genebody,promoter	chr1:101701238-101702084,chr1:101702443-101707074,chr1:101708713-101709305	RP4-575N6.4;ENSG00000225938.1;antisense,RP4-575N6.5;ENSG00000260940.1;sense_overlapping,S1PR1;ENSG00000170989.8;protein_coding	hypo	unmutCLL_NBCB	0.64064	0.96867	0.77003	0.897167
chr1	101713997	101714012	intergenic	NA:NA-NA	NA	hypo	unmutCLL_NBCB	0.0699	0.36111	0.106091	0.220667
chr1	101823506	101823626	genebody	chr1:101788892-101855859	RP11-157N3.1;ENSG00000231671.1;lincRNA	hypo	unmutCLL_NBCB	0.40002	0.88367	0.620318	0.708167
chr1	1022572	1022742	genebody	chr1:1017197-1051741	C1orf159;ENSG00000131591.13;protein_coding	hypo	mutCLL_MBC	0.325114	0.97975	0.41243	0.75596
chr1	1022572	1022759	genebody	chr1:1017197-1051741	C1orf159;ENSG00000131591.13;protein_coding	hypo	unmutCLL_NBCB	0.33494	0.96233	0.436284	0.753926
chr1	102402830	102402976	genebody	chr1:102268129-102462586	OLFM3;ENSG00000118733.12;protein_coding	hypo	unmutCLL_NBCB	0.4801	0.93156	0.497167	0.611833
chr1	102741847	102741957	genebody	chr1:102665294-102855186	RP11-202K23.1;ENSG00000233359.1;lincRNA	hypo	unmutCLL_NBCB	0.44818	0.88867	0.37395	0.699556
chr1	1028876	1028897	genebody	chr1:1017197-1051741	C1orf159;ENSG00000131591.13;protein_coding	hypo	unmutCLL_NBCB	0.66417	0.99189	0.558591	0.503
chr1	102943755	102943921	intergenic	NA:NA-NA	NA	hypo	unmutCLL_NBCB	0.59351	0.92967	0.428409	0.589167
chr1	103076676	103076761	intergenic	NA:NA-NA	NA	hypo	unmutCLL_NBCB	0.60181	0.88611	0.529045	0.5815
chr1	103268191	103268386	genebody	chr1:103228877-103319398	RP5-936J12.1;ENSG00000230864.1;lincRNA	hypo	unmutCLL_NBCB	0.73183	0.98676	0.653823	0.8495
chr1	103328864	103329012	intergenic	NA:NA-NA	NA	hypo	unmutCLL_NBCB	0.71353	0.97667	0.671856	0.810083
chr1	103436335	103436397	genebody	chr1:103342022-103574052	COL11A1;ENSG00000060718.14;protein_coding	hypo	unmutCLL_NBCB	0.29643	0.62967	0.158864	0.186333
chr1	104531561	104531594	intergenic	NA:NA-NA	NA	hypo	unmutCLL_NBCB	0.6062	0.945	0.532045	0.569667
chr1	10460168	10460232	promoter	chr1:10458648-10480201	PGD;ENSG00000142657.16;protein_coding	hypo	unmutCLL_NBCB	0.45824	0.74078	0.266455	0.627333
chr1	104942193	104942224	intergenic	NA:NA-NA	NA	hypo	unmutCLL_NBCB	0.63423	0.9665	0.7776	0.828778
chr1	1052653	1052663	promoter	chr1:1017197-1051741	C1orf159;ENSG00000131591.13;protein_coding	hypo	unmutCLL_NBCB	0.3	0.57478	0.528	0.510333
chr1	1052869	1052909	promoter	chr1:1017197-1051741	C1orf159;ENSG00000131591.13;protein_coding	hypo	unmutCLL_NBCB	0.22898	0.78292	0.768481	0.579889
chr1	105684201	105684262	intergenic	NA:NA-NA	NA	hypo	unmutCLL_NBCB	0.35869	0.83089	0.431773	0.614833
chr1	105808199	105808455	intergenic	NA:NA-NA	NA	hypo	unmutCLL_NBCB	0.73142	0.98613	0.732963	0.798333
chr1	105836836	105836930	intergenic	NA:NA-NA	NA	hypo	mutCLL_MBC,unmutCLL_NBCB	0.7248	0.97589	0.50437	0.80222
chr1	1066075	1066181	intergenic	NA:NA-NA	NA	hypo	unmutCLL_NBCB	0.6813	0.98087	0.602852	0.678
chr1	10699146	10699174	genebody,promoter	chr1:10696660-10856707,chr1:10699297-10714390	CASZ1;ENSG00000130940.10;protein_coding,RP4-734G22.3;ENSG00000272078.1;antisense	hyper	unmutCLL_NBCB	0.52679	0.21544	0.608175	0.371333
chr1	107003904	107004067	intergenic	NA:NA-NA	NA	hypo	unmutCLL_NBCB	0.71056	0.96127	0.877318	0.912083
chr1	107004911	107005054	intergenic	NA:NA-NA	NA	hypo	unmutCLL_NBCB	0.64584	0.99222	0.6805	0.797667
chr1	107162284	107162351	intergenic	NA:NA-NA	NA	hypo	unmutCLL_NBCB	0.55206	0.89644	0.697409	0.792667
chr1	1073539	1073564	promoter	chr1:1072396-1079436	RP11-465B22.5;ENSG00000223823.1;lincRNA	hypo	unmutCLL_NBCB	0.57797	0.86744	0.725545	0.797667
chr1	10777793	10777879	genebody	chr1:10696660-10856707	CASZ1;ENSG00000130940.10;protein_coding	hypo	unmutCLL_NBCB	0.70888	0.96283	0.674527	0.695467
chr1	1078074	1078146	genebody	chr1:1072396-1079436	RP11-465B22.5;ENSG00000223823.1;lincRNA	hypo	mutCLL_MBC	0.1877	0.954333	0.43982	0.83356
chr1	1078074	1078176	genebody	chr1:1072396-1079436	RP11-465B22.5;ENSG00000223823.1;lincRNA	hypo	unmutCLL_NBCB	0.21737	0.96833	0.439818	0.833556
chr1	1078293	1078484	genebody	chr1:1072396-1079436	RP11-465B22.5;ENSG00000223823.1;lincRNA	hypo	mutCLL_MBC	0.221117	0.750167	0.38215	0.68659
chr1	1078293	1078510	genebody	chr1:1072396-1079436	RP11-465B22.5;ENSG00000223823.1;lincRNA	hypo	unmutCLL_NBCB	0.20538	0.7264	0.370541	0.686593
chr1	10802912	10802965	genebody	chr1:10696660-10856707	CASZ1;ENSG00000130940.10;protein_coding	hypo	unmutCLL_NBCB	0.63103	0.99556	0.606045	0.676
chr1	10810080	10810270	genebody	chr1:10696660-10856707	CASZ1;ENSG00000130940.10;protein_coding	hypo	unmutCLL_NBCB	0.62532	0.93883	0.518818	0.602333
chr1	1085560	1085579	intergenic	NA:NA-NA	NA	hypo	mutCLL_MBC,unmutCLL_NBCB	0.17605	0.84578	0.18391	0.48956
chr1	1085720	1085815	intergenic	NA:NA-NA	NA	hypo	unmutCLL_NBCB	0.27177	0.74207	0.312379	0.47525
chr1	10860296	10860424	promoter	chr1:10696660-10856707	CASZ1;ENSG00000130940.10;protein_coding	hypo	unmutCLL_NBCB	0.60899	0.88256	0.555182	0.532833
chr1	10864619	10864699	intergenic	NA:NA-NA	NA	hypo	unmutCLL_NBCB	0.53663	0.79856	0.304485	0.482833
chr1	10886301	10886489	intergenic	NA:NA-NA	NA	hypo	unmutCLL_NBCB	0.71865	0.99707	0.601321	0.785
chr1	108878233	108878265	genebody	chr1:108815564-108918572	SLC25A24P1;ENSG00000241361.4;pseudogene	hypo	mutCLL_MBC,unmutCLL_NBCB	0.5438	0.98744	0.54748	0.81878
chr1	10890290	10890326	intergenic	NA:NA-NA	NA	hypo	mutCLL_MBC,unmutCLL_NBCB	0.16929	0.83042	0.29179	0.73542
chr1	109223167	109223236	intergenic	NA:NA-NA	NA	hypo	unmutCLL_NBCB	0.56197	0.97367	0.681318	0.7495
chr1	109245936	109246171	intergenic	NA:NA-NA	NA	hypo	unmutCLL_NBCB	0.56822	0.88914	0.581182	0.656556
chr1	10961632	10961825	intergenic	NA:NA-NA	NA	hypo	unmutCLL_NBCB	0.66053	0.93076	0.740576	0.731857
chr1	109806823	109806894	genebody	chr1:109792640-109818372	CELSR2;ENSG00000143126.7;protein_coding	hypo	unmutCLL_NBCB	0.6774	0.96922	0.618212	0.6505
chr1	109812054	109812075	genebody	chr1:109792640-109818372	CELSR2;ENSG00000143126.7;protein_coding	hypo	mutCLL_MBC	0.487857	0.937833	0.55807	0.83911
chr1	109817246	109817292	genebody	chr1:109792640-109818372	CELSR2;ENSG00000143126.7;protein_coding	hypo	unmutCLL_NBCB	0.58051	0.96878	0.562409	0.682167
chr1	109843579	109843676	genebody	chr1:109834986-109849663	MYBPHL;ENSG00000221986.2;protein_coding	hypo	unmutCLL_NBCB	0.61127	0.98089	0.68785	0.810667
chr1	109862208	109862261	genebody	chr1:109852191-109940573	SORT1;ENSG00000134243.7;protein_coding	hypo	unmutCLL_NBCB	0.66736	0.992	0.63375	0.688444
chr1	110008988	110009006	promoter	chr1:110009179-110024759	SYPL2;ENSG00000143028.7;protein_coding	hyper	unmutCLL_NBCB	0.49892	0.11373	0.560094	0.458917
chr1	11006575	11006687	genebody	chr1:11006527-11042094	C1orf127;ENSG00000175262.10;protein_coding	hypo	unmutCLL_NBCB	0.49738	0.97178	0.631273	0.845667
chr1	110074747	110074827	intergenic	NA:NA-NA	NA	hypo	unmutCLL_NBCB	0.46999	0.87738	0.377076	0.534556
chr1	1101074	1101347	promoter	chr1:1102483-1102578,chr1:1103242-1103332,chr1:1104384-1104467,chr1:1104736-1105723	MIR200A;ENSG00000207607.1;miRNA,MIR200B;ENSG00000207730.1;miRNA,MIR429;ENSG00000198976.1;miRNA,RP11-465B22.8;ENSG00000272141.1;lincRNA	hypo	unmutCLL_NBCB	0.24734	0.93557	0.444088	0.641167
chr1	1101315	1101347	promoter	chr1:1102483-1102578,chr1:1103242-1103332,chr1:1104384-1104467,chr1:1104736-1105723	MIR200A;ENSG00000207607.1;miRNA,MIR200B;ENSG00000207730.1;miRNA,MIR429;ENSG00000198976.1;miRNA,RP11-465B22.8;ENSG00000272141.1;lincRNA	hypo	mutCLL_MBC	0.1447	0.946167	0.24841	0.60911
chr1	110254690	110254747	promoter	chr1:110254863-110318050	GSTM5;ENSG00000134201.6;protein_coding	hyper	unmutCLL_NBCB	0.39126	0.1126	0.321325	0.29275
chr1	1102819	1102940	promoter	chr1:1102483-1102578,chr1:1103242-1103332,chr1:1104384-1104467,chr1:1104736-1105723	MIR200A;ENSG00000207607.1;miRNA,MIR200B;ENSG00000207730.1;miRNA,MIR429;ENSG00000198976.1;miRNA,RP11-465B22.8;ENSG00000272141.1;lincRNA	hypo	unmutCLL_NBCB	0.60449	0.88817	0.440727	0.385714
chr1	11036500	11036568	genebody	chr1:11006527-11042094	C1orf127;ENSG00000175262.10;protein_coding	hypo	unmutCLL_NBCB	0.67311	0.99567	0.754818	0.824
chr1	1104314	1104344	promoter	chr1:1102483-1102578,chr1:1103242-1103332,chr1:1104384-1104467,chr1:1104736-1105723,chr1:1109263-1133315	MIR200A;ENSG00000207607.1;miRNA,MIR200B;ENSG00000207730.1;miRNA,MIR429;ENSG00000198976.1;miRNA,RP11-465B22.8;ENSG00000272141.1;lincRNA,TTLL10;ENSG00000162571.9;protein_coding	hypo	unmutCLL_NBCB	0.68993	0.96111	0.711182	0.668333
chr1	1104364	1104453	promoter	chr1:1102483-1102578,chr1:1103242-1103332,chr1:1104384-1104467,chr1:1104736-1105723,chr1:1109263-1133315	MIR200A;ENSG00000207607.1;miRNA,MIR200B;ENSG00000207730.1;miRNA,MIR429;ENSG00000198976.1;miRNA,RP11-465B22.8;ENSG00000272141.1;lincRNA,TTLL10;ENSG00000162571.9;protein_coding	hypo	unmutCLL_NBCB	0.53464	0.92893	0.419415	0.463733
chr1	110439496	110439668	promoter	chr1:110438594-110440483	RP11-195M16.3;ENSG00000261055.1;lincRNA	hypo	unmutCLL_NBCB	0.45947	0.99953	0.706515	0.9335
chr1	110463158	110463189	genebody	chr1:110452863-110473614	CSF1;ENSG00000184371.9;protein_coding	hypo	mutCLL_MBC	0.947812	0.989333	0.30285	0.608
chr1	11046561	11046607	promoter	chr1:11006527-11042094	C1orf127;ENSG00000175262.10;protein_coding	hypo	unmutCLL_NBCB	0.46838	0.99956	0.439067	0.548167
chr1	1106298	1106365	promoter	chr1:1104384-1104467,chr1:1104736-1105723,chr1:1109263-1133315	MIR429;ENSG00000198976.1;miRNA,RP11-465B22.8;ENSG00000272141.1;lincRNA,TTLL10;ENSG00000162571.9;protein_coding	hypo	unmutCLL_NBCB	0.68251	0.98558	0.520212	0.664
chr1	110735192	110735307	genebody	chr1:110693107-110744824	SLC6A17;ENSG00000197106.6;protein_coding	hypo	unmutCLL_NBCB	0.53819	0.87978	0.45835	0.574167
chr1	110783217	110783273	genebody	chr1:110753964-110825722	KCNC4;ENSG00000116396.9;protein_coding	hypo	unmutCLL_NBCB	0.48973	0.93967	0.7975	0.8625
chr1	110786574	110786653	genebody	chr1:110753964-110825722	KCNC4;ENSG00000116396.9;protein_coding	hypo	unmutCLL_NBCB	0.04072	0.6482	0.0476364	0.158583
chr1	11105415	11105587	promoter	chr1:11086579-11107290	MASP2;ENSG00000009724.12;protein_coding	hypo	unmutCLL_NBCB	0.62573	0.91858	0.47954	0.541121
chr1	111080804	111080974	intergenic	NA:NA-NA	NA	hypo	unmutCLL_NBCB	0.68044	0.95489	0.686424	0.7662
chr1	111107541	111107613	intergenic	NA:NA-NA	NA	hypo	unmutCLL_NBCB	0.61837	0.95633	0.7555	0.960167
chr1	111151105	111151144	genebody	chr1:111136201-111174096	KCNA2;ENSG00000177301.9;protein_coding	hypo	unmutCLL_NBCB	0.47287	0.85733	0.482667	0.667333
chr1	11121250	11121429	promoter	chr1:11114640-11120081	SRM;ENSG00000116649.5;protein_coding	hypo	mutCLL_MBC,unmutCLL_NBCB	0.097333	0.86406	0.35054	0.67288
chr1	111215998	111216135	promoter	chr1:111214309-111217655	KCNA3;ENSG00000177272.7;protein_coding	hypo	unmutCLL_NBCB	0.16332	0.74286	0.0466515	0.236389
chr1	111216607	111216722	promoter	chr1:111214309-111217655	KCNA3;ENSG00000177272.7;protein_coding	hypo	unmutCLL_NBCB	0.36559	0.6195	0.2985	0.322273
chr1	1117591	1117656	genebody,promoter	chr1:1108435-1114935,chr1:1109263-1133315	TTLL10-AS1;ENSG00000205231.1;antisense,TTLL10;ENSG00000162571.9;protein_coding	hypo	unmutCLL_NBCB	0.1308	0.82367	0.18403	0.404444
chr1	111944672	111944685	intergenic	NA:NA-NA	NA	hypo	mutCLL_MBC	0.146611	0.983	0.080943	0.89922
chr1	111944672	111944689	intergenic	NA:NA-NA	NA	hypo	unmutCLL_NBCB	0.15791	0.98308	0.0827407	0.899222
chr1	112016556	112016623	promoter	chr1:112016413-112021134	C1orf162;ENSG00000143110.7;protein_coding	hypo	mutCLL_MBC	0.01232	0.0764	0.25072	0.52928
chr1	1120393	1120919	genebody	chr1:1109263-1133315	TTLL10;ENSG00000162571.9;protein_coding	hypo	unmutCLL_NBCB	0.1727	0.85463	0.41621	0.53156
chr1	1120880	1120919	genebody	chr1:1109263-1133315	TTLL10;ENSG00000162571.9;protein_coding	hypo	mutCLL_MBC	0.08225	0.853	0.194	0.58256
chr1	112204753	112204872	genebody	chr1:112084839-112259313	RAP1A;ENSG00000116473.10;protein_coding	hypo	unmutCLL_NBCB	0.73032	0.99713	0.795056	0.914333
chr1	112232382	112232518	genebody	chr1:112084839-112259313,chr1:112223251-112298446	FAM212B;ENSG00000197852.8;protein_coding,RAP1A;ENSG00000116473.10;protein_coding	hypo	unmutCLL_NBCB	0.34263	0.81738	0.239048	0.171056
chr1	112245280	112245342	genebody	chr1:112084839-112259313,chr1:112223251-112298446	FAM212B;ENSG00000197852.8;protein_coding,RAP1A;ENSG00000116473.10;protein_coding	hypo	mutCLL_MBC	0.08275	0.991333	0.16338	0.80467
chr1	112358673	112358784	genebody	chr1:112313283-112531777	KCND3;ENSG00000171385.5;protein_coding	hypo	unmutCLL_NBCB	0.6539	0.96422	0.724682	0.796
chr1	112447626	112447700	genebody,promoter	chr1:112313283-112531777,chr1:112451957-112453553	KCND3-AS1;ENSG00000237556.1;antisense,KCND3;ENSG00000171385.5;protein_coding	hypo	unmutCLL_NBCB	0.63345	0.95789	0.483136	0.407833
chr1	112503662	112503914	genebody	chr1:112313283-112531777	KCND3;ENSG00000171385.5;protein_coding	hypo	unmutCLL_NBCB	0.61416	0.878	0.728623	0.8074
chr1	112933109	112933138	intergenic	NA:NA-NA	NA	hypo	unmutCLL_NBCB	0.3721	0.79422	0.422455	0.701333
chr1	113163996	113164168	promoter	chr1:113066139-113163447,chr1:113161794-113214241	CAPZA1;ENSG00000116489.8;protein_coding,ST7L;ENSG00000007341.14;protein_coding	hypo	unmutCLL_NBCB	0.58526	0.98842	0.10391	0.321714
chr1	113181276	113181353	genebody,promoter	chr1:113161794-113214241,chr1:113177340-113177406	CAPZA1;ENSG00000116489.8;protein_coding,RNU7-70P;ENSG00000252750.1;snRNA	hypo	unmutCLL_NBCB	0.71499	0.992	0.72315	0.8855
chr1	113184235	113184380	genebody	chr1:113161794-113214241	CAPZA1;ENSG00000116489.8;protein_coding	hypo	unmutCLL_NBCB	0.58056	0.9715	0.651218	0.863333
chr1	113184311	113184380	genebody	chr1:113161794-113214241	CAPZA1;ENSG00000116489.8;protein_coding	hypo	mutCLL_MBC	0.415111	0.948	0.36912	0.69267
chr1	113252839	113252881	genebody,promoter	chr1:113243727-113250056,chr1:113245235-113254055,chr1:113252615-113258099	PPM1J;ENSG00000155367.11;protein_coding,RHOC;ENSG00000155366.12;protein_coding,RP11-426L16.10;ENSG00000271810.1;protein_coding	hypo	mutCLL_MBC	0.0913833	0.994444	0.51739	0.84092
chr1	113252865	113252893	genebody,promoter	chr1:113243727-113250056,chr1:113245235-113254055,chr1:113252615-113258099	PPM1J;ENSG00000155367.11;protein_coding,RHOC;ENSG00000155366.12;protein_coding,RP11-426L16.10;ENSG00000271810.1;protein_coding	hypo	unmutCLL_NBCB	0.26145	0.99583	0.476303	0.835222
chr1	113261748	113261763	promoter	chr1:113252615-113258099,chr1:113263040-113269857	FAM19A3;ENSG00000184599.9;protein_coding,PPM1J;ENSG00000155367.11;protein_coding	hypo	unmutCLL_NBCB	0.097869	0.41322	0.243909	0.336
chr1	1133128	1133216	genebody	chr1:1109263-1133315	TTLL10;ENSG00000162571.9;protein_coding	hyper	mutCLL_MBC	0.922907	0.965933	0.86704	0.5954
chr1	11334767	11334822	promoter	chr1:11333262-11356106	UBIAD1;ENSG00000120942.9;protein_coding	hypo	unmutCLL_NBCB	0.69673	0.962	0.728364	0.450333
chr1	113386118	113386266	genebody	chr1:113362791-113393265	RP11-426L16.8;ENSG00000215866.3;lincRNA	hypo	unmutCLL_NBCB	0.57128	0.99687	0.626371	0.883267
chr1	1135897	1136039	intergenic	NA:NA-NA	NA	hypo	unmutCLL_NBCB	0.54992	0.8095	0.473197	0.551133
chr1	113673594	113673716	genebody	chr1:113615830-113674882	LRIG2;ENSG00000198799.7;protein_coding	hypo	unmutCLL_NBCB	0.42797	0.97233	0.411873	0.818067
chr1	113673613	113673716	genebody	chr1:113615830-113674882	LRIG2;ENSG00000198799.7;protein_coding	hypo	mutCLL_MBC	0.39915	0.976083	0.25182	0.70493
chr1	11382790	11382974	intergenic	NA:NA-NA	NA	hypo	unmutCLL_NBCB	0.67371	0.97313	0.756635	0.812296
chr1	1138513	1138558	intergenic	NA:NA-NA	NA	hypo	unmutCLL_NBCB	0.6394	0.95844	0.627045	0.693333
chr1	113908215	113908355	intergenic	NA:NA-NA	NA	hypo	unmutCLL_NBCB	0.71213	0.97089	0.552864	0.706667
chr1	1140403	1140493	promoter	chr1:1138887-1142071	TNFRSF18;ENSG00000186891.9;protein_coding	hypo	unmutCLL_NBCB	0.59808	0.97056	0.5375	0.639167
chr1	1142607	1142655	promoter	chr1:1138887-1142071	TNFRSF18;ENSG00000186891.9;protein_coding	hypo	unmutCLL_NBCB	0.15848	0.52573	0.0810379	0.279667
chr1	1144735	1144834	promoter	chr1:1138887-1142071	TNFRSF18;ENSG00000186891.9;protein_coding	hypo	unmutCLL_NBCB	0.2904	0.62611	0.237667	0.448733
chr1	11454424	11454567	intergenic	NA:NA-NA	NA	hypo	unmutCLL_NBCB	0.68649	0.94189	0.802106	0.8345
chr1	11457659	11457757	intergenic	NA:NA-NA	NA	hypo	unmutCLL_NBCB	0.5748	0.86411	0.4135	0.644333
chr1	114696489	114696506	promoter	chr1:114631912-114696541	SYT6;ENSG00000134207.10;protein_coding	hyper	unmutCLL_NBCB	0.3552	0.10233	0.475182	0.512667
chr1	114697693	114697708	promoter	chr1:114631912-114696541	SYT6;ENSG00000134207.10;protein_coding	hyper	unmutCLL_NBCB	0.63257	0.29189	0.624182	0.577333
chr1	114749125	114749252	genebody	chr1:114749048-114804900	RP4-543J13.1;ENSG00000232895.2;lincRNA	hypo	unmutCLL_NBCB	0.56306	0.90473	0.574061	0.62775
chr1	114782065	114782194	genebody	chr1:114749048-114804900	RP4-543J13.1;ENSG00000232895.2;lincRNA	hypo	unmutCLL_NBCB	0.70173	0.99056	0.627515	0.642
chr1	114784215	114784350	genebody	chr1:114749048-114804900	RP4-543J13.1;ENSG00000232895.2;lincRNA	hypo	unmutCLL_NBCB	0.70299	0.97908	0.687932	0.688111
chr1	114891634	114891705	intergenic	NA:NA-NA	NA	hypo	unmutCLL_NBCB	0.63616	0.981	0.642833	0.669667
chr1	114972957	114973060	genebody	chr1:114935398-115053781	TRIM33;ENSG00000197323.6;protein_coding	hypo	unmutCLL_NBCB	0.25966	0.79311	0.125545	0.224833
chr1	11504248	11504376	intergenic	NA:NA-NA	NA	hypo	unmutCLL_NBCB	0.53371	0.89242	0.593788	0.728333
chr1	115226076	115226249	genebody	chr1:115215718-115238239	AMPD1;ENSG00000116748.15;protein_coding	hypo	unmutCLL_NBCB	0.64238	0.95333	0.52397	0.644778
chr1	1152481	1152530	genebody,promoter	chr1:1146705-1149518,chr1:1152287-1167411	SDF4;ENSG00000078808.12;protein_coding,TNFRSF4;ENSG00000186827.6;protein_coding	hypo	unmutCLL_NBCB	0.71115	0.98867	0.812485	0.874778
chr1	1153260	1153353	genebody,promoter	chr1:1146705-1149518,chr1:1152287-1167411	SDF4;ENSG00000078808.12;protein_coding,TNFRSF4;ENSG00000186827.6;protein_coding	hypo	unmutCLL_NBCB	0.61929	0.9935	0.812242	0.878444
chr1	1153560	1153595	genebody,promoter	chr1:1146705-1149518,chr1:1152287-1167411	SDF4;ENSG00000078808.12;protein_coding,TNFRSF4;ENSG00000186827.6;protein_coding	hypo	unmutCLL_NBCB	0.41183	0.93633	0.2994	0.600167
chr1	1154979	1155057	genebody	chr1:1152287-1167411	SDF4;ENSG00000078808.12;protein_coding	hypo	unmutCLL_NBCB	0.65362	0.99605	0.835491	0.7855
chr1	115754724	115754767	intergenic	NA:NA-NA	NA	hypo	unmutCLL_NBCB	0.61077	0.95567	0.585636	0.548
chr1	115826248	115826377	promoter	chr1:115825654-115910693	RP4-663N10.1;ENSG00000228035.1;antisense	hypo	unmutCLL_NBCB	0.70697	0.98773	0.699497	0.8536
chr1	115829649	115829756	genebody	chr1:115825654-115910693,chr1:115828538-115880857	NGF;ENSG00000134259.3;protein_coding,RP4-663N10.1;ENSG00000228035.1;antisense	hypo	unmutCLL_NBCB	0.53555	0.93922	0.645091	0.600333
chr1	11584038	11584063	genebody	chr1:11539222-11597641	PTCHD2;ENSG00000204624.6;protein_coding	hypo	unmutCLL_NBCB	0.43306	0.90611	0.555278	0.652667
chr1	11604304	11604404	intergenic	NA:NA-NA	NA	hypo	unmutCLL_NBCB	0.66493	0.99033	0.694636	0.831
chr1	11622441	11622524	intergenic	NA:NA-NA	NA	hypo	unmutCLL_NBCB	0.72597	0.98807	0.708902	0.67875
chr1	116308631	116308784	genebody	chr1:116242627-116311402	CASQ2;ENSG00000118729.10;protein_coding	hypo	unmutCLL_NBCB	0.69812	0.97887	0.716477	0.82725
chr1	11636536	11636761	intergenic	NA:NA-NA	NA	hypo	unmutCLL_NBCB	0.56353	0.96283	0.56732	0.854238
chr1	11645784	11645871	intergenic	NA:NA-NA	NA	hypo	unmutCLL_NBCB	0.4797	0.91744	0.619591	0.670833
chr1	1171043	1171135	promoter	chr1:1152287-1167411	SDF4;ENSG00000078808.12;protein_coding	hypo	unmutCLL_NBCB	0.65173	0.94925	0.3763	0.457444
chr1	11710872	11711009	genebody,promoter	chr1:11708423-11715842,chr1:11714431-11723384	FBXO2;ENSG00000116661.9;protein_coding,FBXO44;ENSG00000132879.9;protein_coding	hypo	mutCLL_MBC,unmutCLL_NBCB	0.18283	0.66567	0.22991	0.63133
chr1	11711858	11712034	genebody,promoter	chr1:11708423-11715842,chr1:11714431-11723384	FBXO2;ENSG00000116661.9;protein_coding,FBXO44;ENSG00000132879.9;protein_coding	hypo	unmutCLL_NBCB	0.63929	0.97583	0.73781	0.870889
chr1	1171814	1171982	promoter	chr1:1152287-1167411	SDF4;ENSG00000078808.12;protein_coding	hypo	unmutCLL_NBCB	0.19867	0.8847	0.349091	0.552444
chr1	117188771	117188910	genebody	chr1:117117030-117210375	IGSF3;ENSG00000143061.13;protein_coding	hypo	mutCLL_MBC,unmutCLL_NBCB	0.055712	0.9715	0.11806	0.89183
chr1	1173041	1173621	intergenic	NA:NA-NA	NA	hypo	unmutCLL_NBCB	0.092255	0.40053	0.110055	0.194053
chr1	117342185	117342308	intergenic	NA:NA-NA	NA	hypo	unmutCLL_NBCB	0.6311	0.90067	0.557227	0.775667
chr1	1173723	1173743	intergenic	NA:NA-NA	NA	hypo	unmutCLL_NBCB	0.09605	0.50342	0.131182	0.290556
chr1	11740464	11740471	genebody	chr1:11734536-11751707	MAD2L2;ENSG00000116670.10;protein_coding	hypo	mutCLL_MBC	0.61965	0.774167	0.33121	0.59578
chr1	1174365	1174399	intergenic	NA:NA-NA	NA	hypo	unmutCLL_NBCB	0.45177	0.93878	0.6245	0.681167
chr1	117560861	117560944	genebody	chr1:117544381-117579167	CD101;ENSG00000134256.8;protein_coding	hypo	mutCLL_MBC,unmutCLL_NBCB	0.083898	0.97544	0.17136	0.78333
chr1	117594722	117594877	genebody	chr1:117568103-117602112	RP11-27K13.3;ENSG00000236137.1;antisense	hypo	unmutCLL_NBCB	0.51914	0.98187	0.635455	0.749533
chr1	1176296	1176440	intergenic	NA:NA-NA	NA	hypo	unmutCLL_NBCB	0.37015	0.683	0.222778	0.328667
chr1	1176571	1176673	intergenic	NA:NA-NA	NA	hypo	unmutCLL_NBCB	0.3269	0.79078	0.351545	0.3375
chr1	1176862	1176884	intergenic	NA:NA-NA	NA	hypo	unmutCLL_NBCB	0.0768	0.87222	0.10015	0.1395
chr1	11845646	11845736	genebody	chr1:11821843-11849642	C1orf167;ENSG00000215910.3;protein_coding	hypo	unmutCLL_NBCB	0.29835	0.58192	0.354576	0.546333
chr1	11851187	11851251	genebody	chr1:11845779-11866977	MTHFR;ENSG00000177000.6;protein_coding	hypo	unmutCLL_NBCB	0.55347	0.99178	0.485	0.681
chr1	118591256	118591410	genebody	chr1:118496483-118727846	SPAG17;ENSG00000155761.9;protein_coding	hypo	unmutCLL_NBCB	0.58095	0.95222	0.61615	0.6525
chr1	1186312	1186356	promoter	chr1:1177825-1182102,chr1:1185156-1186714	FAM132A;ENSG00000184163.3;protein_coding,RP5-902P8.12;ENSG00000260179.1;lincRNA	hypo	mutCLL_MBC	0.0816	0.952	0.083114	0.414
chr1	1186312	1186483	promoter	chr1:1177825-1182102,chr1:1185156-1186714	FAM132A;ENSG00000184163.3;protein_coding,RP5-902P8.12;ENSG00000260179.1;lincRNA	hypo	unmutCLL_NBCB	0.045141	0.61733	0.0606859	0.232333
chr1	1186594	1186714	promoter	chr1:1177825-1182102,chr1:1185156-1186714	FAM132A;ENSG00000184163.3;protein_coding,RP5-902P8.12;ENSG00000260179.1;lincRNA	hypo	unmutCLL_NBCB	0.064897	0.77808	0.0646688	0.245476
chr1	119190786	119190882	intergenic	NA:NA-NA	NA	hypo	unmutCLL_NBCB	0.68361	0.985	0.522091	0.598333
chr1	11925357	11925437	intergenic	NA:NA-NA	NA	hypo	unmutCLL_NBCB	0.59883	0.87511	0.549227	0.550333
chr1	11938079	11938302	intergenic	NA:NA-NA	NA	hypo	unmutCLL_NBCB	0.69168	0.964	0.754205	0.804125
chr1	11938849	11938898	intergenic	NA:NA-NA	NA	hypo	unmutCLL_NBCB	0.6825	0.96567	0.622409	0.636333
chr1	119522438	119522485	genebody	chr1:119425668-119532179	TBX15;ENSG00000092607.9;protein_coding	hyper	unmutCLL_NBCB	0.53485	0.17848	0.530582	0.533767
chr1	119532833	119532849	promoter	chr1:119425668-119532179	TBX15;ENSG00000092607.9;protein_coding	hyper	unmutCLL_NBCB	0.3424	0.053556	0.465091	0.41
chr1	119535691	119535697	promoter	chr1:119425668-119532179	TBX15;ENSG00000092607.9;protein_coding	hyper	unmutCLL_NBCB	0.50899	0.126	0.56785	0.501833
chr1	11955879	11955983	intergenic	NA:NA-NA	NA	hypo	unmutCLL_NBCB	0.45489	0.95867	0.530788	0.514333
chr1	11970521	11970641	promoter	chr1:11968208-11968328,chr1:11969864-11969984	RNU5E-1;ENSG00000199347.1;snRNA,RNU5E-4P;ENSG00000201801.1;snRNA	hypo	unmutCLL_NBCB	0.6161	0.98253	0.752023	0.865
chr1	11975170	11975274	intergenic	NA:NA-NA	NA	hypo	unmutCLL_NBCB	0.7016	0.98411	0.5905	0.436833
chr1	11979559	11979645	intergenic	NA:NA-NA	NA	hypo	unmutCLL_NBCB	0.514	0.99375	0.607712	0.778444
chr1	11979603	11979645	intergenic	NA:NA-NA	NA	hypo	mutCLL_MBC	0.47735	0.990667	0.49412	0.74967
chr1	120272674	120272744	genebody	chr1:120202420-120286838	PHGDH;ENSG00000092621.7;protein_coding	hypo	mutCLL_MBC	0.49785	0.998	0.60079	0.87878
chr1	12090135	12090153	genebody	chr1:12079522-12092102	MIIP;ENSG00000116691.6;protein_coding	hyper	mutCLL_MBC	0.818778	0.649	0.48976	0.17544
chr1	12100310	12100379	promoter	chr1:12096798-12097071	RN7SL649P;ENSG00000243539.2;misc_RNA	hypo	unmutCLL_NBCB	0.059855	0.32589	0.0659636	0.107067
chr1	12104467	12104621	intergenic	NA:NA-NA	NA	hypo	unmutCLL_NBCB	0.095917	0.801	0.142636	0.243333
chr1	12113477	12113686	intergenic	NA:NA-NA	NA	hypo	unmutCLL_NBCB	0.49747	0.97747	0.521745	0.753917
chr1	121139099	121139182	promoter	chr1:121102016-121140666,chr1:121138613-121204983	AL592494.5;ENSG00000227082.1;lincRNA,RP11-343N15.1;ENSG00000230806.1;lincRNA	hypo	unmutCLL_NBCB	0.1657	0.69267	0.324083	0.625583
chr1	12176197	12176338	genebody	chr1:12123433-12204264	TNFRSF8;ENSG00000120949.10;protein_coding	hypo	unmutCLL_NBCB	0.73353	0.98533	0.911205	0.927583
chr1	12185369	12185442	genebody	chr1:12123433-12204264	TNFRSF8;ENSG00000120949.10;protein_coding	hypo	unmutCLL_NBCB	0.16099	0.953	0.356778	0.7845
chr1	12186203	12186323	genebody	chr1:12123433-12204264	TNFRSF8;ENSG00000120949.10;protein_coding	hypo	mutCLL_MBC,unmutCLL_NBCB	0.06878	0.79553	0.18524	0.79233
chr1	12202798	12202953	genebody	chr1:12123433-12204264	TNFRSF8;ENSG00000120949.10;protein_coding	hypo	unmutCLL_NBCB	0.20838	0.55589	0.558636	0.870667
chr1	1222291	1222323	genebody	chr1:1215815-1227409	SCNN1D;ENSG00000162572.15;protein_coding	hypo	unmutCLL_NBCB	0.648	0.92056	0.791136	0.8965
chr1	12232233	12232287	genebody	chr1:12227059-12269285	TNFRSF1B;ENSG00000028137.12;protein_coding	hypo	unmutCLL_NBCB	0.31413	0.97058	0.45297	0.546222
chr1	1223319	1223347	genebody	chr1:1215815-1227409	SCNN1D;ENSG00000162572.15;protein_coding	hypo	mutCLL_MBC,unmutCLL_NBCB	0.4023	0.88983	0.57152	0.90417
chr1	12238544	12238637	genebody	chr1:12227059-12269285	TNFRSF1B;ENSG00000028137.12;protein_coding	hypo	unmutCLL_NBCB	0.031722	0.91173	0.104241	0.555583
chr1	12238569	12238610	genebody	chr1:12227059-12269285	TNFRSF1B;ENSG00000028137.12;protein_coding	hypo	mutCLL_MBC	0.0173333	0.901333	0.082395	0.48933
chr1	12239149	12239287	genebody	chr1:12227059-12269285	TNFRSF1B;ENSG00000028137.12;protein_coding	hypo	unmutCLL_NBCB	0.016688	0.37117	0.0136773	0.161533
chr1	12245240	12245306	genebody	chr1:12227059-12269285	TNFRSF1B;ENSG00000028137.12;protein_coding	hypo	unmutCLL_NBCB	0.70503	0.99733	0.833455	0.969333
chr1	12245570	12245733	genebody	chr1:12227059-12269285	TNFRSF1B;ENSG00000028137.12;protein_coding	hypo	unmutCLL_NBCB	0.49022	0.97011	0.69212	0.937867
chr1	12251740	12251952	genebody,promoter	chr1:12227059-12269285,chr1:12251769-12251830	MIR4632;ENSG00000263676.1;miRNA,TNFRSF1B;ENSG00000028137.12;protein_coding	hypo	unmutCLL_NBCB	0.15637	0.99671	0.585892	0.962881
chr1	12251803	12251888	genebody,promoter	chr1:12227059-12269285,chr1:12251769-12251830	MIR4632;ENSG00000263676.1;miRNA,TNFRSF1B;ENSG00000028137.12;protein_coding	hypo	mutCLL_MBC	0.05188	0.996133	0.374	0.924
chr1	12257902	12257963	genebody	chr1:12227059-12269285	TNFRSF1B;ENSG00000028137.12;protein_coding	hypo	unmutCLL_NBCB	0.35178	0.79072	0.530214	0.468333
chr1	12258838	12259044	genebody	chr1:12227059-12269285	TNFRSF1B;ENSG00000028137.12;protein_coding	hypo	unmutCLL_NBCB	0.37186	0.98429	0.624848	0.874286
chr1	12258902	12258988	genebody	chr1:12227059-12269285	TNFRSF1B;ENSG00000028137.12;protein_coding	hypo	mutCLL_MBC	0.1689	0.987778	0.53973	0.87656
chr1	1226161	1226228	genebody	chr1:1215815-1227409	SCNN1D;ENSG00000162572.15;protein_coding	hypo	unmutCLL_NBCB	0.67042	0.92613	0.615477	0.7525
chr1	12262046	12262196	genebody	chr1:12227059-12269285	TNFRSF1B;ENSG00000028137.12;protein_coding	hypo	mutCLL_MBC,unmutCLL_NBCB	0.06425	0.76974	0.1072	0.40919
chr1	1227059	1227261	genebody	chr1:1215815-1227409	SCNN1D;ENSG00000162572.15;protein_coding	hypo	unmutCLL_NBCB	0.38937	0.80443	0.369134	0.554562
chr1	1227362	1227441	genebody	chr1:1215815-1227409	SCNN1D;ENSG00000162572.15;protein_coding	hypo	unmutCLL_NBCB	0.012117	0.26989	0.00783333	0.0771667
chr1	1227445	1227615	intergenic	NA:NA-NA	NA	hypo	unmutCLL_NBCB	0.077835	0.467	0.0385342	0.1423
chr1	12291765	12291782	promoter	chr1:12290123-12572099	VPS13D;ENSG00000048707.9;protein_coding	hypo	mutCLL_MBC	0.251	0.997833	0.3937	0.71444
chr1	12291765	12291900	promoter	chr1:12290123-12572099	VPS13D;ENSG00000048707.9;protein_coding	hypo	unmutCLL_NBCB	0.47923	0.99447	0.534636	0.7765
chr1	1230484	1230575	genebody	chr1:1227755-1244989	ACAP3;ENSG00000131584.14;protein_coding	hypo	mutCLL_MBC,unmutCLL_NBCB	0.54012	0.97422	0.33233	0.69967
chr1	1233479	1233541	genebody	chr1:1227755-1244989	ACAP3;ENSG00000131584.14;protein_coding	hypo	unmutCLL_NBCB	0.60545	0.9734	0.639225	0.662917
chr1	1234253	1234290	genebody	chr1:1227755-1244989	ACAP3;ENSG00000131584.14;protein_coding	hypo	unmutCLL_NBCB	0.624	0.89878	0.438318	0.569167
chr1	1235482	1235692	genebody	chr1:1227755-1244989	ACAP3;ENSG00000131584.14;protein_coding	hypo	unmutCLL_NBCB	0.11812	0.82492	0.0823182	0.193111
chr1	1238700	1238723	genebody	chr1:1227755-1244989	ACAP3;ENSG00000131584.14;protein_coding	hypo	unmutCLL_NBCB	0.34217	0.82567	0.583409	0.589
chr1	1240047	1240096	genebody,promoter	chr1:1227755-1244989,chr1:1243946-1247057	ACAP3;ENSG00000131584.14;protein_coding,PUSL1;ENSG00000169972.7;protein_coding	hypo	unmutCLL_NBCB	0.57747	0.87125	0.76903	0.85
chr1	1240241	1240327	genebody,promoter	chr1:1227755-1244989,chr1:1243946-1247057	ACAP3;ENSG00000131584.14;protein_coding,PUSL1;ENSG00000169972.7;protein_coding	hyper	unmutCLL_NBCB	0.51228	0.22093	0.557455	0.67625
chr1	1244872	1244886	promoter	chr1:1227755-1244989,chr1:1243946-1247057	ACAP3;ENSG00000131584.14;protein_coding,PUSL1;ENSG00000169972.7;protein_coding	hypo	unmutCLL_NBCB	0.49377	0.76133	0.364364	0.387
chr1	1245271	1245337	promoter	chr1:1227755-1244989,chr1:1243946-1247057	ACAP3;ENSG00000131584.14;protein_coding,PUSL1;ENSG00000169972.7;protein_coding	hypo	unmutCLL_NBCB	0.57063	0.98933	0.445091	0.553
chr1	1249361	1249384	genebody,promoter	chr1:1227755-1244989,chr1:1246964-1260071	ACAP3;ENSG00000131584.14;protein_coding,CPSF3L;ENSG00000127054.14;protein_coding	hypo	unmutCLL_NBCB	0.70383	0.98889	0.829455	0.668833
chr1	12527373	12527439	genebody	chr1:12290123-12572099	VPS13D;ENSG00000048707.9;protein_coding	hypo	unmutCLL_NBCB	0.56633	0.98444	0.656227	0.891167
chr1	1261270	1261363	promoter	chr1:1246964-1260071,chr1:1260135-1264277	CPSF3L;ENSG00000127054.14;protein_coding,GLTPD1;ENSG00000224051.2;protein_coding	hypo	unmutCLL_NBCB	0.44127	0.84983	0.176091	0.294111
chr1	1266544	1266572	promoter	chr1:1266693-1270686	TAS1R3;ENSG00000169962.4;protein_coding	hypo	unmutCLL_NBCB	0.6292	0.91989	0.3715	0.2305
chr1	12897481	12897520	intergenic	NA:NA-NA	NA	hypo	unmutCLL_NBCB	0.1977	0.92958	0.3746	0.539889
chr1	1293041	1293061	genebody	chr1:1288068-1297157	MXRA8;ENSG00000162576.12;protein_coding	hypo	unmutCLL_NBCB	0.60887	0.97622	0.662545	0.611833
chr1	1295070	1295079	promoter	chr1:1288068-1297157	MXRA8;ENSG00000162576.12;protein_coding	hypo	unmutCLL_NBCB	0.4277	0.95067	0.562273	0.808167
chr1	1297739	1297806	promoter	chr1:1288068-1297157	MXRA8;ENSG00000162576.12;protein_coding	hypo	unmutCLL_NBCB	0.36827	0.83411	0.132357	0.1425
chr1	1357870	1358015	promoter	chr1:1353799-1357149,chr1:1355624-1358071,chr1:1361507-1363167	ANKRD65;ENSG00000235098.4;protein_coding,RP4-758J18.7;ENSG00000225905.1;antisense,TMEM88B;ENSG00000205116.3;protein_coding	hypo	unmutCLL_NBCB	0.49588	0.98767	0.426582	0.4622
chr1	1377589	1377655	genebody	chr1:1370240-1378262	VWA1;ENSG00000179403.10;protein_coding	hypo	unmutCLL_NBCB	0.68037	0.97911	0.590045	0.6555
chr1	13830238	13830346	genebody	chr1:13801444-13840543	LRRC38;ENSG00000162494.5;protein_coding	hypo	unmutCLL_NBCB	0.71007	0.96578	0.90275	0.878333
chr1	1388705	1388876	genebody	chr1:1385068-1405538	ATAD3C;ENSG00000215915.5;protein_coding	hypo	unmutCLL_NBCB	0.65711	0.96356	0.4459	0.532167
chr1	1396191	1396210	genebody	chr1:1385068-1405538	ATAD3C;ENSG00000215915.5;protein_coding	hyper	unmutCLL_NBCB	0.39094	0.11489	0.364214	0.347
chr1	14308671	14308742	intergenic	NA:NA-NA	NA	hypo	unmutCLL_NBCB	0.41557	0.88311	0.151682	0.17
chr1	1444290	1444379	promoter	chr1:1447530-1470067	ATAD3A;ENSG00000197785.9;protein_coding	hypo	unmutCLL_NBCB	0.47446	0.81967	0.362705	0.438667
chr1	145035947	145036024	genebody	chr1:144836156-145076186	PDE4DIP;ENSG00000178104.15;protein_coding	hypo	unmutCLL_NBCB	0.6976	0.99467	0.502045	0.649833
chr1	1458007	1458058	genebody	chr1:1447530-1470067	ATAD3A;ENSG00000197785.9;protein_coding	hypo	unmutCLL_NBCB	0.70397	0.97844	0.816025	0.860167
chr1	14624574	14624712	intergenic	NA:NA-NA	NA	hypo	unmutCLL_NBCB	0.59717	0.95917	0.502091	0.559222
chr1	146523686	146523779	intergenic	NA:NA-NA	NA	hypo	unmutCLL_NBCB	0.15421	0.80433	0.386727	0.620833
chr1	146549680	146549754	promoter	chr1:146551294-146551419	RNVU1-8;ENSG00000201142.1;snRNA	hyper	mutCLL_MBC	0.705407	0.297444	0.62935	0.35758
chr1	146549714	146549754	promoter	chr1:146551294-146551419	RNVU1-8;ENSG00000201142.1;snRNA	hyper	unmutCLL_NBCB	0.67062	0.31356	0.6755	0.394
chr1	146549870	146549939	promoter	chr1:146551294-146551419	RNVU1-8;ENSG00000201142.1;snRNA	hyper	mutCLL_MBC,unmutCLL_NBCB	0.70095	0.25806	0.60482	0.32722
chr1	146895261	146895322	promoter	chr1:146891925-146892027	Y_RNA;ENSG00000207209.1;misc_RNA	hypo	unmutCLL_NBCB	0.61799	0.9598	0.731315	0.683833
chr1	146964600	146964758	intergenic	NA:NA-NA	NA	hypo	unmutCLL_NBCB	0.6209	0.94933	0.58	0.729778
chr1	14736751	14736892	intergenic	NA:NA-NA	NA	hypo	unmutCLL_NBCB	0.68958	0.97542	0.601033	0.720778
chr1	147789799	147789811	intergenic	NA:NA-NA	NA	hypo	mutCLL_MBC	0.2316	0.381	0.42639	0.80856
chr1	1484280	1484311	genebody	chr1:1477052-1510249	SSU72;ENSG00000160075.10;protein_coding	hypo	unmutCLL_NBCB	0.69417	0.98589	0.654045	0.826333
chr1	1489399	1489460	genebody	chr1:1477052-1510249	SSU72;ENSG00000160075.10;protein_coding	hypo	unmutCLL_NBCB	0.55618	0.93647	0.580409	0.721333
chr1	1489783	1489972	genebody	chr1:1477052-1510249	SSU72;ENSG00000160075.10;protein_coding	hypo	unmutCLL_NBCB	0.70939	0.97928	0.717424	0.7712
chr1	14899864	14899998	intergenic	NA:NA-NA	NA	hypo	unmutCLL_NBCB	0.69198	0.98248	0.774967	0.865611
chr1	1490382	1490490	genebody	chr1:1477052-1510249	SSU72;ENSG00000160075.10;protein_coding	hypo	unmutCLL_NBCB	0.6505	0.98333	0.688545	0.729667
chr1	149669653	149669706	genebody,promoter	chr1:149649059-149719362,chr1:149671722-149671868,chr1:149672996-149677289	RNU1-68P;ENSG00000252925.1;snRNA,RP11-353N4.4;ENSG00000223759.2;lincRNA,RP11-353N4.5;ENSG00000234232.2;lincRNA	hypo	unmutCLL_NBCB	0.64264	0.986	0.515182	0.855667
chr1	149672547	149672603	genebody,promoter	chr1:149649059-149719362,chr1:149671722-149671868,chr1:149672996-149677289,chr1:149675977-149676609	AL358813.2;ENSG00000203815.2;protein_coding,RNU1-68P;ENSG00000252925.1;snRNA,RP11-353N4.4;ENSG00000223759.2;lincRNA,RP11-353N4.5;ENSG00000234232.2;lincRNA	hypo	mutCLL_MBC,unmutCLL_NBCB	0.0378	0.76033	0.021091	0.7
chr1	149784591	149784608	promoter	chr1:149754244-149783928,chr1:149754432-149783312,chr1:149784825-149785236	HIST2H2BF;ENSG00000203814.5;protein_coding,HIST2H3D;ENSG00000183598.3;protein_coding,RP11-196G18.21;ENSG00000242663.1;antisense	hypo	mutCLL_MBC	0.01475	0.145667	0.015001	0.33533
chr1	150131321	150131578	genebody	chr1:150121372-150136916	PLEKHO1;ENSG00000023902.9;protein_coding	hypo	unmutCLL_NBCB	0.49967	0.95491	0.500418	0.776606
chr1	150131405	150131578	genebody	chr1:150121372-150136916	PLEKHO1;ENSG00000023902.9;protein_coding	hypo	mutCLL_MBC	0.472014	0.968667	0.39575	0.70275
chr1	150267038	150267210	promoter	chr1:150266288-150281414	MRPS21;ENSG00000187145.10;protein_coding	hypo	unmutCLL_NBCB	0.65728	0.91194	0.717479	0.632879
chr1	150290999	150291090	promoter	chr1:150293924-150325671	PRPF3;ENSG00000117360.8;protein_coding	hypo	unmutCLL_NBCB	0.36892	0.90687	0.275818	0.352333
chr1	150432970	150433038	genebody	chr1:150335566-150449042	RPRD2;ENSG00000163125.11;protein_coding	hypo	mutCLL_MBC,unmutCLL_NBCB	0.088934	0.90478	0.10734	0.81211
chr1	150545011	150545085	promoter	chr1:150541448-150541745	RN7SL600P;ENSG00000264584.1;misc_RNA	hypo	mutCLL_MBC	0.255865	0.98	0.24503	0.96917
chr1	150545075	150545085	promoter	chr1:150541448-150541745	RN7SL600P;ENSG00000264584.1;misc_RNA	hypo	unmutCLL_NBCB	0.096433	0.97322	0.151864	0.9575
chr1	15056724	15056819	genebody	chr1:14925199-15444539	KAZN;ENSG00000189337.11;protein_coding	hypo	unmutCLL_NBCB	0.62261	0.95333	0.4663	0.409167
chr1	15060050	15060128	genebody	chr1:14925199-15444539	KAZN;ENSG00000189337.11;protein_coding	hypo	unmutCLL_NBCB	0.4713	0.75822	0.586318	0.702333
chr1	150733971	150734035	genebody	chr1:150702671-150738433	CTSS;ENSG00000163131.6;protein_coding	hypo	mutCLL_MBC,unmutCLL_NBCB	0.16767	0.98944	0.41018	0.852
chr1	150750653	150750767	intergenic	NA:NA-NA	NA	hypo	unmutCLL_NBCB	0.70682	0.9872	0.731955	0.750667
chr1	150809335	150809434	genebody	chr1:150782180-150849244	ARNT;ENSG00000143437.16;protein_coding	hypo	unmutCLL_NBCB	0.67146	0.98822	0.622091	0.969
chr1	150895577	150895712	promoter	chr1:150898738-150937213	SETDB1;ENSG00000143379.8;protein_coding	hypo	unmutCLL_NBCB	0.57765	0.96367	0.237986	0.383333
chr1	150947928	150948023	promoter	chr1:150933058-150947479,chr1:150945598-150948010	CERS2;ENSG00000143418.15;protein_coding,RP11-316M1.3;ENSG00000231073.1;antisense	hypo	unmutCLL_NBCB	0.20038	0.52511	0.133691	0.260733
chr1	151029664	151029921	genebody,promoter	chr1:151023446-151042801,chr1:151030233-151040970	CDC42SE1;ENSG00000197622.8;protein_coding,MLLT11;ENSG00000213190.2;protein_coding	hypo	unmutCLL_NBCB	0.44923	0.96233	0.501106	0.69175
chr1	151029733	151029858	genebody,promoter	chr1:151023446-151042801,chr1:151030233-151040970	CDC42SE1;ENSG00000197622.8;protein_coding,MLLT11;ENSG00000213190.2;protein_coding	hypo	mutCLL_MBC	0.42755	0.964667	0.41748	0.74544
chr1	151045041	151045178	promoter	chr1:151023446-151042801,chr1:151043053-151098018	CDC42SE1;ENSG00000197622.8;protein_coding,GABPB2;ENSG00000143458.7;protein_coding	hypo	mutCLL_MBC,unmutCLL_NBCB	0.51292	0.9934	0.62507	0.9052
chr1	151210794	151210917	genebody	chr1:151170424-151222012	PIP5K1A;ENSG00000143398.15;protein_coding	hypo	unmutCLL_NBCB	0.19435	0.98622	0.45465	0.626833
chr1	151371439	151371505	promoter	chr1:151372009-151374420	PSMB4;ENSG00000159377.6;protein_coding	hypo	unmutCLL_NBCB	0.59798	0.89293	0.646909	0.74
chr1	151497163	151497278	genebody	chr1:151482985-151511168	CGN;ENSG00000143375.10;protein_coding	hypo	unmutCLL_NBCB	0.67289	0.94947	0.837015	0.951667
chr1	151555502	151555660	genebody	chr1:151512780-151556059	TUFT1;ENSG00000143367.11;protein_coding	hypo	unmutCLL_NBCB	0.65573	0.97893	0.52906	0.795667
chr1	15167649	15167760	genebody	chr1:14925199-15444539	KAZN;ENSG00000189337.11;protein_coding	hypo	unmutCLL_NBCB	0.71303	0.97811	0.7139	0.886267
chr1	151799389	151799507	genebody	chr1:151778546-151804348	RORC;ENSG00000143365.12;protein_coding	hypo	unmutCLL_NBCB	0.25746	0.97989	0.0995152	0.635833
chr1	151812660	151812723	promoter	chr1:151810294-151813033,chr1:151814211-151814313,chr1:151814352-151822861	AL450992.2;ENSG00000234614.1;antisense,C2CD4D;ENSG00000225556.1;protein_coding,Y_RNA;ENSG00000201134.1;misc_RNA	hypo	mutCLL_MBC	0.085125	0.187	0.26371	0.51387
chr1	151966961	151967069	promoter	chr1:151955390-151966866,chr1:151967006-152015250	NBPF18P;ENSG00000229021.2;antisense,S100A10;ENSG00000197747.4;protein_coding	hypo	unmutCLL_NBCB	0.12648	0.59854	0.0693377	0.157143
chr1	151969199	151969214	promoter	chr1:151955390-151966866,chr1:151967006-152015250	NBPF18P;ENSG00000229021.2;antisense,S100A10;ENSG00000197747.4;protein_coding	hypo	unmutCLL_NBCB	0.29908	0.80244	0.168955	0.272
chr1	152050923	152051120	intergenic	NA:NA-NA	NA	hypo	unmutCLL_NBCB	0.61582	0.91906	0.564832	0.701444
chr1	152051837	152051895	intergenic	NA:NA-NA	NA	hypo	unmutCLL_NBCB	0.67848	0.97578	0.5064	0.705833
chr1	152161876	152161884	genebody	chr1:152140600-152339163	FLG-AS1;ENSG00000237975.2;antisense	hyper	mutCLL_MBC	0.264278	0.122	0.50047	0.22522
chr1	152161883	152161926	genebody	chr1:152140600-152339163	FLG-AS1;ENSG00000237975.2;antisense	hyper	unmutCLL_NBCB	0.41084	0.1535	0.445722	0.219833
chr1	152277134	152277216	genebody	chr1:152140600-152339163,chr1:152274650-152297679	FLG-AS1;ENSG00000237975.2;antisense,FLG;ENSG00000143631.10;protein_coding	hypo	unmutCLL_NBCB	0.72091	0.97378	0.67055	0.712667
chr1	152321840	152321899	genebody	chr1:152140600-152339163,chr1:152321210-152332482	FLG-AS1;ENSG00000237975.2;antisense,FLG2;ENSG00000143520.6;protein_coding	hypo	unmutCLL_NBCB	0.73844	0.99533	0.6175	0.727667
chr1	152413643	152413697	genebody	chr1:152346429-152417932	RP1-91G5.3;ENSG00000227415.1;antisense	hypo	unmutCLL_NBCB	0.30934	0.60367	0.39005	0.357
chr1	152466740	152466823	intergenic	NA:NA-NA	NA	hypo	unmutCLL_NBCB	0.60187	0.97456	0.781409	0.894333
chr1	152481198	152481289	promoter	chr1:152483319-152484653	LCE5A;ENSG00000186207.4;protein_coding	hypo	unmutCLL_NBCB	0.55863	0.95022	0.336939	0.525
chr1	152506426	152506526	intergenic	NA:NA-NA	NA	hypo	unmutCLL_NBCB	0.65614	0.97978	0.4577	0.752
chr1	15276466	15276509	genebody	chr1:14925199-15444539	KAZN;ENSG00000189337.11;protein_coding	hypo	unmutCLL_NBCB	0.66333	0.992	0.751924	0.868667
chr1	15291618	15291703	genebody	chr1:14925199-15444539	KAZN;ENSG00000189337.11;protein_coding	hypo	unmutCLL_NBCB	0.59482	0.92956	0.365955	0.5845
chr1	15294069	15294242	genebody	chr1:14925199-15444539	KAZN;ENSG00000189337.11;protein_coding	hypo	unmutCLL_NBCB	0.71036	0.97211	0.665379	0.9125
chr1	153148456	153148564	promoter	chr1:153146993-153164152	RP1-140J1.1;ENSG00000229699.1;lincRNA	hypo	unmutCLL_NBCB	0.71789	0.99456	0.646409	0.749
chr1	153161338	153161406	genebody	chr1:153146993-153164152	RP1-140J1.1;ENSG00000229699.1;lincRNA	hypo	unmutCLL_NBCB	0.5958	0.93467	0.622067	0.612778
chr1	15318647	15318695	genebody	chr1:14925199-15444539	KAZN;ENSG00000189337.11;protein_coding	hypo	unmutCLL_NBCB	0.6812	0.97467	0.486571	0.757667
chr1	1532384	1532443	intergenic	NA:NA-NA	NA	hypo	unmutCLL_NBCB	0.1576	0.4865	0.0409167	0.174
chr1	153312980	153313046	genebody	chr1:153302595-153321316	PGLYRP4;ENSG00000163218.10;protein_coding	hypo	unmutCLL_NBCB	0.69917	0.98	0.535074	0.617167
chr1	153326895	153326926	promoter	chr1:153330329-153333503	S100A9;ENSG00000163220.10;protein_coding	hypo	unmutCLL_NBCB	0.5195	0.87611	0.422636	0.564
chr1	153333996	153334169	intergenic	NA:NA-NA	NA	hypo	unmutCLL_NBCB	0.47498	0.97378	0.390571	0.58
chr1	153369093	153369200	intergenic	NA:NA-NA	NA	hypo	unmutCLL_NBCB	0.699	0.97578	0.662591	0.740833
chr1	153448348	153448449	intergenic	NA:NA-NA	NA	hypo	unmutCLL_NBCB	0.61767	0.99422	0.593909	0.4855
chr1	15348077	15348160	genebody	chr1:14925199-15444539	KAZN;ENSG00000189337.11;protein_coding	hypo	unmutCLL_NBCB	0.4514	0.93011	0.273	0.240833
chr1	153606100	153606177	promoter	chr1:153591262-153606568,chr1:153598807-153606816,chr1:153603913-153606873,chr1:153606524-153618782	CHTOP;ENSG00000160679.8;protein_coding,RP1-178F15.4;ENSG00000272030.1;antisense,RP1-178F15.5;ENSG00000271853.1;processed_transcript,S100A13;ENSG00000189171.9;protein_coding	hypo	unmutCLL_NBCB	0.46972	0.74967	0.430364	0.351833
chr1	153607543	153607620	promoter	chr1:153591262-153606568,chr1:153598807-153606816,chr1:153603913-153606873,chr1:153606524-153618782	CHTOP;ENSG00000160679.8;protein_coding,RP1-178F15.4;ENSG00000272030.1;antisense,RP1-178F15.5;ENSG00000271853.1;processed_transcript,S100A13;ENSG00000189171.9;protein_coding	hypo	unmutCLL_NBCB	0.35664	0.79871	0.261078	0.127762
chr1	153608110	153608154	promoter	chr1:153591262-153606568,chr1:153598807-153606816,chr1:153603913-153606873,chr1:153606524-153618782	CHTOP;ENSG00000160679.8;protein_coding,RP1-178F15.4;ENSG00000272030.1;antisense,RP1-178F15.5;ENSG00000271853.1;processed_transcript,S100A13;ENSG00000189171.9;protein_coding	hypo	unmutCLL_NBCB	0.53913	0.96767	0.221273	0.253333
chr1	15369481	15369614	genebody	chr1:14925199-15444539	KAZN;ENSG00000189337.11;protein_coding	hypo	unmutCLL_NBCB	0.66267	0.96322	0.646	0.6495
chr1	153865286	153865463	genebody	chr1:153777200-153895451	GATAD2B;ENSG00000143614.7;protein_coding	hypo	mutCLL_MBC,unmutCLL_NBCB	0.056457	0.98186	0.075583	0.84995
chr1	1539117	1539330	promoter	chr1:1533391-1535476	C1orf233;ENSG00000228594.1;protein_coding	hypo	unmutCLL_NBCB	0.68818	0.95313	0.740227	0.820667
chr1	153937182	153937271	genebody,promoter	chr1:153931574-153940188,chr1:153938991-153939406,chr1:153940009-153946839	CREB3L4;ENSG00000143578.11;protein_coding,RP11-422P24.10;ENSG00000273026.1;antisense,SLC39A1;ENSG00000143570.13;protein_coding	hypo	unmutCLL_NBCB	0.64303	0.98578	0.537545	0.792333
chr1	153948668	153948850	promoter	chr1:153946744-153950164,chr1:153950218-153951636	JTB;ENSG00000143543.10;protein_coding,RP11-422P24.11;ENSG00000272654.1;lincRNA	hypo	unmutCLL_NBCB	0.72809	0.989	0.629193	0.547048
chr1	154146667	154146734	genebody	chr1:154127783-154167124	TPM3;ENSG00000143549.15;protein_coding	hypo	unmutCLL_NBCB	0.65893	0.99222	0.637273	0.788667
chr1	15421329	15421451	genebody	chr1:14925199-15444539	KAZN;ENSG00000189337.11;protein_coding	hypo	mutCLL_MBC,unmutCLL_NBCB	0.48236	0.8713	0.2102	0.4853
chr1	15421625	15421703	genebody	chr1:14925199-15444539	KAZN;ENSG00000189337.11;protein_coding	hypo	unmutCLL_NBCB	0.54007	0.94022	0.315682	0.678
chr1	15421625	15421815	genebody	chr1:14925199-15444539	KAZN;ENSG00000189337.11;protein_coding	hypo	mutCLL_MBC	0.596458	0.938833	0.27157	0.64327
chr1	154318751	154318868	genebody	chr1:154298028-154323783	ATP8B2;ENSG00000143515.12;protein_coding	hypo	unmutCLL_NBCB	0.70102	0.97293	0.715182	0.846583
chr1	154345395	154345441	intergenic	NA:NA-NA	NA	hypo	unmutCLL_NBCB	0.37097	0.99356	0.413091	0.834833
chr1	154345395	154345491	intergenic	NA:NA-NA	NA	hypo	mutCLL_MBC	0.370967	0.993556	0.56097	0.82358
chr1	154375635	154375710	genebody,promoter	chr1:154374803-154379040,chr1:154377668-154441926	IL6R;ENSG00000160712.8;protein_coding,RP11-350G8.5;ENSG00000228013.1;antisense	hypo	mutCLL_MBC	0.05475	0.279667	0.10885	0.46844
chr1	154404988	154405124	genebody	chr1:154377668-154441926	IL6R;ENSG00000160712.8;protein_coding	hypo	unmutCLL_NBCB	0.47505	0.99858	0.763729	0.971381
chr1	15443921	15444038	genebody	chr1:14925199-15444539,chr1:15442447-15478960	KAZN;ENSG00000189337.11;protein_coding,TMEM51-AS1;ENSG00000175147.7;processed_transcript	hypo	unmutCLL_NBCB	0.63177	0.98422	0.61245	0.715667
chr1	15445071	15445177	genebody	chr1:15442447-15478960	TMEM51-AS1;ENSG00000175147.7;processed_transcript	hypo	unmutCLL_NBCB	0.68922	0.99078	0.576591	0.601167
chr1	154475283	154475299	promoter	chr1:154442247-154474589,chr1:154474694-154520623	SHE;ENSG00000169291.5;protein_coding,TDRD10;ENSG00000163239.8;protein_coding	hyper	unmutCLL_NBCB	0.53877	0.15222	0.489636	0.431
chr1	154483392	154483445	genebody	chr1:154474694-154520623	TDRD10;ENSG00000163239.8;protein_coding	hypo	mutCLL_MBC,unmutCLL_NBCB	0.65217	0.99644	0.64159	0.95689
chr1	15450348	15450403	genebody	chr1:15442447-15478960	TMEM51-AS1;ENSG00000175147.7;processed_transcript	hypo	unmutCLL_NBCB	0.67147	0.96633	0.777091	0.795
chr1	154535650	154535788	promoter	chr1:154521052-154531504,chr1:154540256-154552502	CHRNB2;ENSG00000160716.4;protein_coding,UBE2Q1;ENSG00000160714.5;protein_coding	hypo	unmutCLL_NBCB	0.6062	0.95067	0.639773	0.7195
chr1	154631560	154631591	intergenic	NA:NA-NA	NA	hypo	unmutCLL_NBCB	0.64553	0.94989	0.311333	0.516167
chr1	154693934	154694071	genebody	chr1:154669930-154842756	KCNN3;ENSG00000143603.14;protein_coding	hypo	unmutCLL_NBCB	0.58845	0.95403	0.59354	0.836037
chr1	154693963	154694071	genebody	chr1:154669930-154842756	KCNN3;ENSG00000143603.14;protein_coding	hypo	mutCLL_MBC	0.588163	0.946833	0.59341	0.85293
chr1	1549697	1550044	promoter	chr1:1549137-1551175,chr1:1550794-1565990	MIB2;ENSG00000197530.8;protein_coding,RP11-345P4.9;ENSG00000272106.1;antisense	hypo	unmutCLL_NBCB	0.031426	0.3942	0.148741	0.436148
chr1	155015916	155016025	genebody	chr1:155006299-155023406	DCST1;ENSG00000163357.6;protein_coding	hypo	unmutCLL_NBCB	0.58066	0.915	0.500091	0.618889
chr1	155090709	155090779	promoter	chr1:155092965-155093074	Y_RNA;ENSG00000202027.1;misc_RNA	hypo	unmutCLL_NBCB	0.71376	0.9895	0.647758	0.489222
chr1	155098002	155098165	promoter	chr1:155099935-155107333	EFNA1;ENSG00000169242.7;protein_coding	hypo	unmutCLL_NBCB	0.68583	0.96403	0.772528	0.848667
chr1	155098750	155098951	promoter	chr1:155099935-155107333	EFNA1;ENSG00000169242.7;protein_coding	hyper	unmutCLL_NBCB	0.66799	0.40769	0.51948	0.532078
chr1	155123630	155123679	intergenic	NA:NA-NA	NA	hypo	unmutCLL_NBCB	0.22358	0.66175	0.120015	0.289333
chr1	155152308	155152483	genebody	chr1:155141884-155159748,chr1:155145872-155157447	RP11-201K10.3;ENSG00000273088.1;protein_coding,TRIM46;ENSG00000163462.13;protein_coding	hypo	mutCLL_MBC	0.432358	0.987778	0.57943	0.91372
chr1	155152313	155152473	genebody	chr1:155141884-155159748,chr1:155145872-155157447	RP11-201K10.3;ENSG00000273088.1;protein_coding,TRIM46;ENSG00000163462.13;protein_coding	hypo	unmutCLL_NBCB	0.39733	0.98745	0.566905	0.898067
chr1	15519108	15519245	genebody	chr1:15479027-15546976	TMEM51;ENSG00000171729.9;protein_coding	hypo	unmutCLL_NBCB	0.69035	0.98611	0.585955	0.744
chr1	15519530	15519660	genebody	chr1:15479027-15546976	TMEM51;ENSG00000171729.9;protein_coding	hyper	mutCLL_MBC	0.565643	0.4358	0.55561	0.23889
chr1	155290924	155290946	genebody,promoter	chr1:155286653-155293967,chr1:155290686-155300905	RUSC1-AS1;ENSG00000225855.2;antisense,RUSC1;ENSG00000160753.11;protein_coding	hypo	mutCLL_MBC	0.0582333	0.0736667	0.05775	0.36775
chr1	155291253	155291338	genebody,promoter	chr1:155286653-155293967,chr1:155290686-155300905	RUSC1-AS1;ENSG00000225855.2;antisense,RUSC1;ENSG00000160753.11;protein_coding	hypo	unmutCLL_NBCB	0.28704	0.5474	0.477405	0.658667
chr1	155291337	155291404	genebody,promoter	chr1:155286653-155293967,chr1:155290686-155300905	RUSC1-AS1;ENSG00000225855.2;antisense,RUSC1;ENSG00000160753.11;protein_coding	hypo	mutCLL_MBC	0.2973	0.564333	0.36827	0.75444
chr1	155291403	155291452	genebody,promoter	chr1:155286653-155293967,chr1:155290686-155300905	RUSC1-AS1;ENSG00000225855.2;antisense,RUSC1;ENSG00000160753.11;protein_coding	hypo	unmutCLL_NBCB	0.23243	0.99044	0.665576	0.928
chr1	155435865	155436012	genebody	chr1:155305058-155532598	ASH1L;ENSG00000116539.6;protein_coding	hypo	unmutCLL_NBCB	0.47691	0.96078	0.494914	0.425333
chr1	155557001	155557090	intergenic	NA:NA-NA	NA	hypo	unmutCLL_NBCB	0.68094	0.99273	0.739932	0.904167
chr1	155900570	155900674	genebody,promoter	chr1:155882833-155904191,chr1:155895748-155895877	KIAA0907;ENSG00000132680.6;protein_coding,SCARNA4;ENSG00000252808.1;snoRNA	hypo	unmutCLL_NBCB	0.68064	0.98	0.541273	0.825
chr1	155903219	155903353	promoter	chr1:155882833-155904191	KIAA0907;ENSG00000132680.6;protein_coding	hypo	unmutCLL_NBCB	0.53444	0.92843	0.232217	0.187333
chr1	155911555	155911675	promoter	chr1:155911479-155912625	RXFP4;ENSG00000173080.4;protein_coding	hypo	unmutCLL_NBCB	0.38547	0.96467	0.441318	0.8565
chr1	155912447	155912555	promoter	chr1:155911479-155912625	RXFP4;ENSG00000173080.4;protein_coding	hypo	unmutCLL_NBCB	0.70162	0.9732	0.723167	0.87175
chr1	155952907	155952940	genebody	chr1:155916629-155976861	ARHGEF2;ENSG00000116584.13;protein_coding	hypo	unmutCLL_NBCB	0.62055	0.906	0.675409	0.8
chr1	155958871	155958965	genebody,promoter	chr1:155916629-155976861,chr1:155961180-155971578	ARHGEF2;ENSG00000116584.13;protein_coding,RP11-336K24.5;ENSG00000224276.1;antisense	hypo	unmutCLL_NBCB	0.65817	0.95122	0.645515	0.8375
chr1	155982939	155983140	genebody	chr1:155978838-155990750	SSR2;ENSG00000163479.9;protein_coding	hypo	unmutCLL_NBCB	0.5917	0.98994	0.716837	0.892533
chr1	155983072	155983109	genebody	chr1:155978838-155990750	SSR2;ENSG00000163479.9;protein_coding	hypo	mutCLL_MBC	0.1266	0.966833	0.34536	0.68956
chr1	1560384	1560429	genebody	chr1:1550794-1565990	MIB2;ENSG00000197530.8;protein_coding	hypo	unmutCLL_NBCB	0.6196	0.93856	0.400833	0.664167
chr1	156096665	156096737	genebody	chr1:156052363-156109880	LMNA;ENSG00000160789.15;protein_coding	hypo	unmutCLL_NBCB	0.3489	0.787	0.318273	0.305583
chr1	156118810	156118891	promoter	chr1:156117156-156147543	SEMA4A;ENSG00000196189.8;protein_coding	hypo	unmutCLL_NBCB	0.61326	0.93407	0.241955	0.184333
chr1	156183861	156183939	promoter	chr1:156182772-156213123,chr1:156182783-156212874	PMF1-BGLAP;ENSG00000260238.1;protein_coding,PMF1;ENSG00000160783.15;protein_coding	hypo	unmutCLL_NBCB	0.62978	0.91133	0.595909	0.575
chr1	156189943	156190005	genebody	chr1:156182772-156213123,chr1:156182783-156212874	PMF1-BGLAP;ENSG00000260238.1;protein_coding,PMF1;ENSG00000160783.15;protein_coding	hypo	unmutCLL_NBCB	0.66921	0.98933	0.71405	0.7475
chr1	156267675	156267738	promoter	chr1:156259879-156265463,chr1:156268414-156269428	C1orf85;ENSG00000198715.7;protein_coding,VHLL;ENSG00000189030.8;protein_coding	hypo	unmutCLL_NBCB	0.6729	0.98711	0.773409	0.903833
chr1	156353902	156353919	genebody,promoter	chr1:156339002-156355011,chr1:156358017-156365401	RHBG;ENSG00000132677.8;protein_coding,RP11-139I14.2;ENSG00000237390.1;lincRNA	hypo	mutCLL_MBC	0.0795	0.316333	0.063756	0.45156
chr1	156358488	156358512	promoter	chr1:156358017-156365401	RP11-139I14.2;ENSG00000237390.1;lincRNA	hypo	unmutCLL_NBCB	0.10873	0.50956	0.0202727	0.104833
chr1	156366619	156366745	intergenic	NA:NA-NA	NA	hypo	mutCLL_MBC,unmutCLL_NBCB	0.31046	0.99324	0.30085	0.97105
chr1	156390238	156390260	genebody,promoter	chr1:156374041-156400493,chr1:156390122-156390230	C1orf61;ENSG00000125462.12;protein_coding,MIR9-1;ENSG00000207933.2;miRNA	hypo	mutCLL_MBC	0.00675	0.218667	0.024697	0.30667
chr1	15640882	15640978	genebody	chr1:15573767-15726779	FHAD1;ENSG00000142621.15;protein_coding	hypo	unmutCLL_NBCB	0.4388	0.98033	0.659909	0.680333
chr1	156415520	156415555	intergenic	NA:NA-NA	NA	hypo	unmutCLL_NBCB	0.45968	0.81744	0.476	0.732
chr1	1564353	1564421	genebody,promoter	chr1:1550794-1565990,chr1:1567473-1570639	MIB2;ENSG00000197530.8;protein_coding,MMP23B;ENSG00000189409.8;protein_coding	hypo	unmutCLL_NBCB	0.10684	0.44078	0.134182	0.3405
chr1	156451665	156451788	genebody,promoter	chr1:156433518-156470620,chr1:156453889-156454002	MEF2D;ENSG00000116604.13;protein_coding,Y_RNA;ENSG00000206651.1;misc_RNA	hypo	unmutCLL_NBCB	0.26543	0.93478	0.228682	0.304667
chr1	156475486	156475582	promoter	chr1:156433518-156470620,chr1:156479645-156481473	MEF2D;ENSG00000116604.13;protein_coding,RP11-284F21.8;ENSG00000260460.1;lincRNA	hypo	unmutCLL_NBCB	0.49864	0.82067	0.645715	0.615778
chr1	15651543	15651593	genebody	chr1:15573767-15726779	FHAD1;ENSG00000142621.15;protein_coding	hypo	unmutCLL_NBCB	0.61223	0.89444	0.658409	0.732
chr1	156877082	156877211	genebody	chr1:156863489-156886226	PEAR1;ENSG00000187800.9;protein_coding	hypo	unmutCLL_NBCB	0.53998	0.92089	0.587723	0.6264
chr1	156883220	156883345	genebody	chr1:156863489-156886226	PEAR1;ENSG00000187800.9;protein_coding	hypo	unmutCLL_NBCB	0.41755	0.93939	0.344794	0.575
chr1	15705294	15705335	genebody	chr1:15573767-15726779	FHAD1;ENSG00000142621.15;protein_coding	hypo	unmutCLL_NBCB	0.53468	0.98756	0.595773	0.839667
chr1	15742827	15742999	genebody	chr1:15736390-15756839	EFHD2;ENSG00000142634.8;protein_coding	hypo	unmutCLL_NBCB	0.0437	0.33958	0.0289394	0.0631111
chr1	158146954	158147056	promoter	chr1:158149736-158154686	CD1D;ENSG00000158473.6;protein_coding	hypo	mutCLL_MBC,unmutCLL_NBCB	0.6755	0.99378	0.54901	0.848
chr1	158721446	158721529	promoter	chr1:158724509-158725681	OR6K6;ENSG00000180433.4;protein_coding	hypo	unmutCLL_NBCB	0.73298	0.99625	0.738212	0.744222
chr1	158834230	158834294	intergenic	NA:NA-NA	NA	hypo	unmutCLL_NBCB	0.66165	0.95767	0.667182	0.791667
chr1	15910878	15910890	genebody,promoter	chr1:15853307-15918874,chr1:15898847-15911605	AGMAT;ENSG00000116771.5;protein_coding,DNAJC16;ENSG00000116138.8;protein_coding	hypo	unmutCLL_NBCB	0.38458	0.77478	0.317214	0.3795
chr1	159191168	159191250	intergenic	NA:NA-NA	NA	hypo	unmutCLL_NBCB	0.69883	0.97478	0.586591	0.6535
chr1	15945716	15945771	promoter	chr1:15943994-15995539	DDI2;ENSG00000197312.7;protein_coding	hypo	unmutCLL_NBCB	0.29078	0.84044	0.319418	0.353133
chr1	159461170	159461263	intergenic	NA:NA-NA	NA	hypo	unmutCLL_NBCB	0.69939	0.98822	0.704773	0.823333
chr1	15963923	15964022	genebody	chr1:15943994-15995539	DDI2;ENSG00000197312.7;protein_coding	hypo	unmutCLL_NBCB	0.67702	0.98313	0.785409	0.930167
chr1	159980811	159980941	intergenic	NA:NA-NA	NA	hypo	unmutCLL_NBCB	0.64607	0.94	0.558545	0.677333
chr1	160163430	160163517	genebody	chr1:160160284-160171676	CASQ1;ENSG00000143318.8;protein_coding	hypo	mutCLL_MBC	0.668583	0.918833	0.56121	0.85778
chr1	160233284	160233352	genebody,promoter	chr1:160185504-160254920,chr1:160187253-160254920,chr1:160231533-160232568	DCAF8;ENSG00000132716.14;protein_coding,DCAF8;ENSG00000258465.2;protein_coding,RP11-574F21.2;ENSG00000228606.1;antisense	hypo	unmutCLL_NBCB	0.73755	0.99678	0.85	0.836667
chr1	16030298	16030379	genebody	chr1:16010826-16061264	PLEKHM2;ENSG00000116786.7;protein_coding	hypo	mutCLL_MBC,unmutCLL_NBCB	0.2922	0.99511	0.39728	0.95733
chr1	160596103	160596147	genebody	chr1:160577889-160617085	SLAMF1;ENSG00000117090.10;protein_coding	hypo	unmutCLL_NBCB	0.042015	0.79222	0.0513636	0.212
chr1	16065021	16065035	promoter	chr1:16049213-16063391,chr1:16062899-16067891,chr1:16068916-16074477	RP11-288I21.1;ENSG00000237938.1;antisense,SLC25A34;ENSG00000162461.7;protein_coding,TMEM82;ENSG00000162460.6;protein_coding	hypo	unmutCLL_NBCB	0.42127	0.92478	0.4726	0.7
chr1	16069619	16069656	genebody,promoter	chr1:16066545-16076391,chr1:16068916-16074477	RP11-169K16.4;ENSG00000224459.1;antisense,TMEM82;ENSG00000162460.6;protein_coding	hypo	unmutCLL_NBCB	0.64147	0.95878	0.542867	0.550667
chr1	1609007	1609076	genebody	chr1:1592938-1624167	SLC35E2B;ENSG00000189339.7;protein_coding	hypo	unmutCLL_NBCB	0.032631	0.52067	0.0259351	0.0875238
chr1	161059142	161059243	promoter	chr1:161040784-161059389	PVRL4;ENSG00000143217.7;protein_coding	hypo	unmutCLL_NBCB	0.15623	0.68656	0.243909	0.447667
chr1	161068710	161068772	promoter	chr1:161068150-161070136	KLHDC9;ENSG00000162755.9;protein_coding	hypo	unmutCLL_NBCB	0.032638	0.30013	0.0876818	0.236667
chr1	16109384	16109450	genebody	chr1:16083101-16113089	FBLIM1;ENSG00000162458.8;protein_coding	hypo	unmutCLL_NBCB	0.41681	0.984	0.503955	0.6995
chr1	161120480	161120588	promoter	chr1:161122565-161128646	UFC1;ENSG00000143222.7;protein_coding	hypo	unmutCLL_NBCB	0.47293	0.98356	0.396955	0.612667
chr1	161120543	161120607	promoter	chr1:161122565-161128646	UFC1;ENSG00000143222.7;protein_coding	hypo	mutCLL_MBC	0.41315	0.984833	0.39327	0.65022
chr1	16118955	16119016	intergenic	NA:NA-NA	NA	hypo	unmutCLL_NBCB	0.22308	0.63622	0.143864	0.337
chr1	161277177	161277203	genebody	chr1:161274524-161279762	MPZ;ENSG00000158887.11;protein_coding	hypo	unmutCLL_NBCB	0.41494	0.84611	0.433409	0.488333
chr1	16141013	16141210	intergenic	NA:NA-NA	NA	hypo	unmutCLL_NBCB	0.65903	0.99173	0.772595	0.901417
chr1	161505454	161505634	genebody	chr1:161482965-161574889	RP11-25K21.6;ENSG00000273112.1;processed_transcript	hypo	unmutCLL_NBCB	0.735	0.99117	0.684267	0.791111
chr1	16157386	16157509	intergenic	NA:NA-NA	NA	hypo	unmutCLL_NBCB	0.089575	0.45883	0.0537143	0.119143
chr1	16163065	16163397	genebody	chr1:16160559-16174642	RP11-169K16.9;ENSG00000179743.2;antisense	hypo	unmutCLL_NBCB	0.060815	0.81416	0.123196	0.330786
chr1	16163117	16163268	genebody	chr1:16160559-16174642	RP11-169K16.9;ENSG00000179743.2;antisense	hypo	mutCLL_MBC	0.0703667	0.94881	0.14673	0.44617
chr1	161695156	161695195	genebody	chr1:161691352-161697933	FCRLB;ENSG00000162746.10;protein_coding	hypo	mutCLL_MBC	0.0837	0.948667	0.35334	0.76956
chr1	161695156	161695306	genebody	chr1:161691352-161697933	FCRLB;ENSG00000162746.10;protein_coding	hypo	unmutCLL_NBCB	0.43127	0.95322	0.518814	0.8418
chr1	16170191	16170236	genebody,promoter	chr1:16160559-16174642,chr1:16174358-16266955	RP11-169K16.9;ENSG00000179743.2;antisense,SPEN;ENSG00000065526.6;protein_coding	hypo	mutCLL_MBC,unmutCLL_NBCB	0.14573	0.89111	0.15176	0.57833
chr1	16171143	16171294	genebody,promoter	chr1:16160559-16174642,chr1:16174358-16266955	RP11-169K16.9;ENSG00000179743.2;antisense,SPEN;ENSG00000065526.6;protein_coding	hypo	unmutCLL_NBCB	0.051986	0.83967	0.113833	0.281111
chr1	16182673	16182779	genebody	chr1:16174358-16266955	SPEN;ENSG00000065526.6;protein_coding	hypo	unmutCLL_NBCB	0.55324	0.9761	0.59755	0.876167
chr1	16183942	16184007	genebody	chr1:16174358-16266955	SPEN;ENSG00000065526.6;protein_coding	hypo	mutCLL_MBC,unmutCLL_NBCB	0.31868	0.964	0.43317	0.759
chr1	16192991	16193082	genebody	chr1:16174358-16266955	SPEN;ENSG00000065526.6;protein_coding	hypo	mutCLL_MBC	0.729889	0.986222	0.61033	0.891
chr1	16210007	16210063	genebody	chr1:16174358-16266955	SPEN;ENSG00000065526.6;protein_coding	hypo	unmutCLL_NBCB	0.22253	0.93222	0.146136	0.419
chr1	16210007	16210122	genebody	chr1:16174358-16266955	SPEN;ENSG00000065526.6;protein_coding	hypo	mutCLL_MBC	0.2411	0.932222	0.20099	0.46475
chr1	162116892	162116990	genebody	chr1:162039563-162353321	NOS1AP;ENSG00000198929.8;protein_coding	hypo	unmutCLL_NBCB	0.73809	0.98867	0.5907	0.7095
chr1	162417479	162417582	intergenic	NA:NA-NA	NA	hypo	unmutCLL_NBCB	0.6382	0.97889	0.683778	0.73
chr1	16266063	16266169	genebody	chr1:16174358-16266955	SPEN;ENSG00000065526.6;protein_coding	hypo	unmutCLL_NBCB	0.60403	0.97308	0.629818	0.883222
chr1	16269115	16269164	genebody	chr1:16268363-16302627	ZBTB17;ENSG00000116809.7;protein_coding	hypo	mutCLL_MBC	0.437667	0.998667	0.58218	0.85789
chr1	16276090	16276259	genebody	chr1:16268363-16302627	ZBTB17;ENSG00000116809.7;protein_coding	hypo	unmutCLL_NBCB	0.036787	0.87033	0.0209848	0.1174
chr1	162816273	162816326	genebody	chr1:162794247-162838605	C1orf110;ENSG00000185860.9;protein_coding	hypo	unmutCLL_NBCB	0.71703	0.99033	0.705773	0.7925
chr1	16289258	16289359	genebody	chr1:16268363-16302627	ZBTB17;ENSG00000116809.7;protein_coding	hypo	unmutCLL_NBCB	0.33412	0.98247	0.576992	0.91425
chr1	16291538	16291564	genebody	chr1:16268363-16302627	ZBTB17;ENSG00000116809.7;protein_coding	hypo	unmutCLL_NBCB	0.03341	0.41322	0.06235	0.100167
chr1	1629309	1629499	intergenic	NA:NA-NA	NA	hypo	unmutCLL_NBCB	0.58084	0.96224	0.675474	0.824944
chr1	16301228	16301365	promoter	chr1:16268363-16302627	ZBTB17;ENSG00000116809.7;protein_coding	hypo	unmutCLL_NBCB	0.042629	0.71524	0.0485758	0.119389
chr1	163076802	163076954	intergenic	NA:NA-NA	NA	hypo	unmutCLL_NBCB	0.66368	0.92483	0.541439	0.58
chr1	16318107	16318331	intergenic	NA:NA-NA	NA	hypo	unmutCLL_NBCB	0.66418	0.98428	0.64495	0.777905
chr1	16344467	16344490	promoter	chr1:16340522-16346089,chr1:16345369-16360545	CLCNKA;ENSG00000186510.7;protein_coding,HSPB7;ENSG00000173641.13;protein_coding	hypo	mutCLL_MBC	0.141883	0.998667	0.28365	0.77389
chr1	16344467	16344557	promoter	chr1:16340522-16346089,chr1:16345369-16360545	CLCNKA;ENSG00000186510.7;protein_coding,HSPB7;ENSG00000173641.13;protein_coding	hypo	unmutCLL_NBCB	0.56087	0.99893	0.585409	0.909167
chr1	16362399	16362523	intergenic	NA:NA-NA	NA	hypo	unmutCLL_NBCB	0.4173	0.83553	0.41052	0.363167
chr1	163647395	163647480	intergenic	NA:NA-NA	NA	hypo	unmutCLL_NBCB	0.55097	0.966	0.517667	0.689889
chr1	163662105	163662286	intergenic	NA:NA-NA	NA	hypo	unmutCLL_NBCB	0.72755	0.97939	0.733127	0.8332
chr1	164290673	164290723	intergenic	NA:NA-NA	NA	hyper	unmutCLL_NBCB	0.51901	0.1081	0.607779	0.563048
chr1	164291501	164291536	intergenic	NA:NA-NA	NA	hypo	unmutCLL_NBCB	0.63734	0.971	0.477	0.651333
chr1	164337508	164337644	intergenic	NA:NA-NA	NA	hypo	unmutCLL_NBCB	0.58523	0.94156	0.679212	0.797333
chr1	164376050	164376131	intergenic	NA:NA-NA	NA	hypo	unmutCLL_NBCB	0.35782	0.94889	0.548227	0.686333
chr1	16441049	16441137	intergenic	NA:NA-NA	NA	hypo	unmutCLL_NBCB	0.4715	0.97556	0.214389	0.535833
chr1	16453178	16453221	genebody	chr1:16450831-16482582	EPHA2;ENSG00000142627.9;protein_coding	hypo	unmutCLL_NBCB	0.59499	0.97111	0.521318	0.606167
chr1	16458782	16458824	genebody	chr1:16450831-16482582	EPHA2;ENSG00000142627.9;protein_coding	hypo	unmutCLL_NBCB	0.65609	0.90722	0.813091	0.796333
chr1	164680719	164680790	genebody	chr1:164524820-164868533	PBX1;ENSG00000185630.14;protein_coding	hypo	unmutCLL_NBCB	0.5334	0.962	0.292258	0.520833
chr1	16471720	16471744	genebody	chr1:16450831-16482582	EPHA2;ENSG00000142627.9;protein_coding	hypo	unmutCLL_NBCB	0.52256	0.788	0.5197	0.617778
chr1	16472625	16472683	genebody	chr1:16450831-16482582	EPHA2;ENSG00000142627.9;protein_coding	hypo	mutCLL_MBC,unmutCLL_NBCB	0.087036	0.97889	0.40267	0.88033
chr1	164762239	164762312	genebody	chr1:164524820-164868533	PBX1;ENSG00000185630.14;protein_coding	hypo	unmutCLL_NBCB	0.64865	0.96433	0.57685	0.778
chr1	16502566	16502614	intergenic	NA:NA-NA	NA	hypo	mutCLL_MBC	0.127142	0.113833	0.34632	0.66973
chr1	16514787	16514875	intergenic	NA:NA-NA	NA	hypo	unmutCLL_NBCB	0.52174	0.87483	0.530485	0.539778
chr1	16539011	16539041	promoter	chr1:16524348-16539104	ARHGEF19;ENSG00000142632.12;protein_coding	hypo	unmutCLL_NBCB	0.48167	0.84411	0.330214	0.385833
chr1	16554067	16554090	promoter	chr1:16555367-16556038	C1orf134;ENSG00000204377.3;protein_coding	hyper	unmutCLL_NBCB	0.6121	0.34167	0.776591	0.604667
chr1	166294607	166294760	intergenic	NA:NA-NA	NA	hypo	unmutCLL_NBCB	0.58903	0.96939	0.527529	0.748
chr1	166322105	166322151	intergenic	NA:NA-NA	NA	hypo	unmutCLL_NBCB	0.65219	0.981	0.546937	0.805167
chr1	167031072	167031190	genebody	chr1:167022072-167059868	GPA33;ENSG00000143167.7;protein_coding	hypo	unmutCLL_NBCB	0.67915	0.9742	0.682883	0.79975
chr1	167135639	167135757	intergenic	NA:NA-NA	NA	hypo	unmutCLL_NBCB	0.64936	0.97389	0.649778	0.9075
chr1	167509311	167509346	genebody	chr1:167498913-167523004	CREG1;ENSG00000143162.7;protein_coding	hypo	unmutCLL_NBCB	0.4283	0.90367	0.2075	0.235667
chr1	167572294	167572353	intergenic	NA:NA-NA	NA	hypo	mutCLL_MBC	0.0276	0.154667	0.17422	0.51222
chr1	167651605	167651683	genebody	chr1:167599329-167675486	RCSD1;ENSG00000198771.6;protein_coding	hypo	unmutCLL_NBCB	0.47813	0.88711	0.517273	0.643167
chr1	168196264	168196348	promoter	chr1:168195175-168222263	SFT2D2;ENSG00000213064.5;protein_coding	hypo	unmutCLL_NBCB	0.11908	0.80573	0.105778	0.124333
chr1	16862157	16862197	promoter	chr1:16860380-16862144,chr1:16865560-16866070	AL355149.2;ENSG00000268674.1;protein_coding,U1;ENSG00000233421.3;lincRNA	hyper	mutCLL_MBC	0.9032	0.535467	0.88409	0.582
chr1	16862157	16862201	promoter	chr1:16860380-16862144,chr1:16865560-16866070	AL355149.2;ENSG00000268674.1;protein_coding,U1;ENSG00000233421.3;lincRNA	hyper	unmutCLL_NBCB	0.85594	0.51	0.884091	0.582
chr1	168809547	168809690	intergenic	NA:NA-NA	NA	hypo	unmutCLL_NBCB	0.68428	0.96593	0.687227	0.673667
chr1	1691282	1691321	genebody	chr1:1682670-1711896	NADK;ENSG00000008130.11;protein_coding	hypo	unmutCLL_NBCB	0.63323	0.94044	0.677318	0.744167
chr1	16971553	16971597	promoter	chr1:16944750-16971178	CROCCP2;ENSG00000215908.5;lincRNA	hypo	unmutCLL_NBCB	0.45843	0.91644	0.309182	0.525
chr1	17026022	17026079	genebody	chr1:17013833-17046652	ESPNP;ENSG00000268869.1;pseudogene	hypo	unmutCLL_NBCB	0.09785	0.3909	0.121	0.228704
chr1	17030775	17030825	genebody	chr1:17013833-17046652	ESPNP;ENSG00000268869.1;pseudogene	hypo	unmutCLL_NBCB	0.58954	0.92456	0.778318	0.802667
chr1	170596062	170596121	genebody	chr1:170567994-170616480	RP1-79C4.1;ENSG00000235303.1;lincRNA	hypo	unmutCLL_NBCB	0.71016	0.98822	0.532803	0.808667
chr1	17091019	17091127	genebody	chr1:17066767-17299474,chr1:17081404-17096732	CROCC;ENSG00000058453.12;protein_coding,MST1L;ENSG00000186715.6;pseudogene	hypo	unmutCLL_NBCB	0.68283	0.97133	0.403818	0.449167
chr1	1713282	1713574	promoter	chr1:1682670-1711896	NADK;ENSG00000008130.11;protein_coding	hypo	unmutCLL_NBCB	0.48594	0.89683	0.621232	0.773121
chr1	1713719	1713792	promoter	chr1:1682670-1711896	NADK;ENSG00000008130.11;protein_coding	hypo	unmutCLL_NBCB	0.0055864	0.40346	0.08275	0.440238
chr1	171374370	171374480	intergenic	NA:NA-NA	NA	hypo	unmutCLL_NBCB	0.35596	0.65625	0.210727	0.274333
chr1	1713942	1713954	promoter	chr1:1682670-1711896	NADK;ENSG00000008130.11;protein_coding	hypo	unmutCLL_NBCB	0.03514	0.58675	0.263389	0.540111
chr1	171607997	171608030	genebody	chr1:171604556-171621823	MYOC;ENSG00000034971.10;protein_coding	hypo	unmutCLL_NBCB	0.4243	0.967	0.606417	0.740667
chr1	17223174	17223280	genebody,promoter	chr1:17066767-17299474,chr1:17222474-17222638	CROCC;ENSG00000058453.12;protein_coding,RNU1-2;ENSG00000207005.1;snRNA	hypo	unmutCLL_NBCB	0.080886	0.334	0.0312273	0.112556
chr1	172419732	172419807	genebody	chr1:172389827-172437971	C1orf105;ENSG00000180999.6;protein_coding	hypo	unmutCLL_NBCB	0.58225	0.95133	0.695288	0.8995
chr1	17285213	17285258	genebody	chr1:17066767-17299474	CROCC;ENSG00000058453.12;protein_coding	hypo	unmutCLL_NBCB	0.66807	0.97244	0.832625	0.8475
chr1	17305438	17305504	promoter	chr1:17300996-17307330,chr1:17305420-17331586	MFAP2;ENSG00000117122.9;protein_coding,RP1-37C10.3;ENSG00000226526.1;antisense	hypo	mutCLL_MBC	0.121333	0.305	0.11797	0.38144
chr1	17318770	17318794	genebody	chr1:17305420-17331586,chr1:17312452-17338423	ATP13A2;ENSG00000159363.13;protein_coding,RP1-37C10.3;ENSG00000226526.1;antisense	hypo	unmutCLL_NBCB	0.55168	0.99267	0.784773	0.882333
chr1	173739556	173739606	genebody	chr1:173684079-173755840	KLHL20;ENSG00000076321.6;protein_coding	hypo	unmutCLL_NBCB	0.51943	0.98508	0.581258	0.763667
chr1	17387738	17387888	intergenic	NA:NA-NA	NA	hypo	unmutCLL_NBCB	0.67335	0.97727	0.743227	0.823917
chr1	173990069	173990228	promoter	chr1:173900351-173991435,chr1:173978404-173985344,chr1:173991646-173992123	RC3H1-IT1;ENSG00000236535.1;sense_intronic,RC3H1;ENSG00000135870.7;protein_coding,RP11-160H22.3;ENSG00000224977.1;lincRNA	hypo	unmutCLL_NBCB	0.12844	0.71273	0.285841	0.299333
chr1	17407789	17407928	genebody	chr1:17393255-17445948	PADI2;ENSG00000117115.8;protein_coding	hypo	unmutCLL_NBCB	0.68597	0.99967	0.719778	0.901167
chr1	17420989	17421149	genebody	chr1:17393255-17445948	PADI2;ENSG00000117115.8;protein_coding	hypo	unmutCLL_NBCB	0.5826	0.98322	0.744682	0.867667
chr1	17460086	17460133	intergenic	NA:NA-NA	NA	hypo	unmutCLL_NBCB	0.71018	0.97389	0.44245	0.576167
chr1	175064864	175064960	genebody	chr1:175036993-175117202	TNN;ENSG00000120332.11;protein_coding	hypo	unmutCLL_NBCB	0.725	0.99167	0.6889	0.833333
chr1	175087764	175087901	genebody	chr1:175036993-175117202	TNN;ENSG00000120332.11;protein_coding	hypo	unmutCLL_NBCB	0.6172	0.96887	0.565515	0.816417
chr1	175162405	175162552	promoter	chr1:175126122-175162135	KIAA0040;ENSG00000235750.5;protein_coding	hypo	mutCLL_MBC	0.138983	0.519333	0.28288	0.58928
chr1	175162481	175162552	promoter	chr1:175126122-175162135	KIAA0040;ENSG00000235750.5;protein_coding	hypo	unmutCLL_NBCB	0.18476	0.6148	0.245045	0.574
chr1	17519576	17519834	genebody	chr1:17516277-17524112	RP11-380J14.1;ENSG00000204362.5;lincRNA	hypo	unmutCLL_NBCB	0.71645	0.98706	0.746036	0.8566
chr1	17528180	17528237	promoter	chr1:17531620-17572500	PADI1;ENSG00000142623.8;protein_coding	hypo	mutCLL_MBC	0.06345	0.248833	0.10065	0.35178
chr1	175387639	175387729	genebody	chr1:175284329-175712906	TNR;ENSG00000116147.12;protein_coding	hypo	unmutCLL_NBCB	0.69157	0.94456	0.582818	0.695833
chr1	175388725	175388777	genebody	chr1:175284329-175712906	TNR;ENSG00000116147.12;protein_coding	hypo	unmutCLL_NBCB	0.7238	0.99278	0.758955	0.9215
chr1	175472664	175472735	genebody	chr1:175284329-175712906	TNR;ENSG00000116147.12;protein_coding	hypo	unmutCLL_NBCB	0.58812	0.90689	0.581318	0.854667
chr1	17553264	17553438	genebody	chr1:17531620-17572500	PADI1;ENSG00000142623.8;protein_coding	hypo	unmutCLL_NBCB	0.66552	0.9779	0.578812	0.802889
chr1	175568145	175568215	genebody	chr1:175284329-175712906	TNR;ENSG00000116147.12;protein_coding	hyper	mutCLL_MBC	0.682367	0.648556	0.44582	0.16958
chr1	175632315	175632427	genebody	chr1:175284329-175712906	TNR;ENSG00000116147.12;protein_coding	hypo	unmutCLL_NBCB	0.70036	0.99373	0.671977	0.926083
chr1	175667695	175667832	genebody	chr1:175284329-175712906	TNR;ENSG00000116147.12;protein_coding	hypo	unmutCLL_NBCB	0.73659	0.98822	0.715682	0.904333
chr1	17598728	17598851	genebody	chr1:17575592-17610728	PADI3;ENSG00000142619.4;protein_coding	hypo	unmutCLL_NBCB	0.70881	0.97267	0.562227	0.786167
chr1	17599879	17599957	genebody,promoter	chr1:17575592-17610728,chr1:17604383-17604470	MIR3972;ENSG00000266634.1;miRNA,PADI3;ENSG00000142619.4;protein_coding	hypo	unmutCLL_NBCB	0.60307	0.96667	0.739955	0.7285
chr1	176607635	176607756	genebody	chr1:176432306-176814735	PAPPA2;ENSG00000116183.6;protein_coding	hypo	unmutCLL_NBCB	0.48215	0.88222	0.2845	0.539333
chr1	17665147	17665177	genebody	chr1:17634689-17690499,chr1:17655506-17676070	AC004824.2;ENSG00000269468.1;protein_coding,PADI4;ENSG00000159339.9;protein_coding	hypo	unmutCLL_NBCB	0.54513	0.99133	0.41203	0.701333
chr1	177183331	177183424	genebody	chr1:177140632-177251558	BRINP2;ENSG00000198797.6;protein_coding	hypo	unmutCLL_NBCB	0.41907	0.86956	0.301773	0.406167
chr1	177208281	177208402	genebody	chr1:177140632-177251558	BRINP2;ENSG00000198797.6;protein_coding	hypo	unmutCLL_NBCB	0.27249	0.73433	0.484545	0.622333
chr1	177219680	177219706	genebody	chr1:177140632-177251558	BRINP2;ENSG00000198797.6;protein_coding	hypo	unmutCLL_NBCB	0.4397	0.95978	0.244727	0.440667
chr1	17771471	17771523	promoter	chr1:17776258-17776359	snoU13;ENSG00000239020.1;snoRNA	hypo	unmutCLL_NBCB	0.66077	0.97078	0.515773	0.610667
chr1	177908237	177908284	genebody	chr1:177893090-177953438,chr1:177897922-178007142	RP4-798P15.3;ENSG00000254154.4;processed_transcript,SEC16B;ENSG00000120341.14;protein_coding	hypo	mutCLL_MBC,unmutCLL_NBCB	0.60425	0.96089	0.42912	0.69989
chr1	178302361	178302407	genebody	chr1:178062863-178448644	RASAL2;ENSG00000075391.12;protein_coding	hypo	mutCLL_MBC	0.806148	0.987667	0.5955	0.85208
chr1	178462604	178462681	intergenic	NA:NA-NA	NA	hypo	unmutCLL_NBCB	0.72382	0.99261	0.733364	0.835133
chr1	178514058	178514230	genebody,promoter	chr1:178482211-178517734,chr1:178511886-178518024,chr1:178511949-178517579	C1ORF220;ENSG00000184909.8;protein_coding,C1orf220;ENSG00000213057.4;protein_coding,TEX35;ENSG00000240021.5;protein_coding	hypo	mutCLL_MBC,unmutCLL_NBCB	0.089982	0.94061	0.10464	0.66117
chr1	17857306	17857356	intergenic	NA:NA-NA	NA	hypo	unmutCLL_NBCB	0.088337	0.96633	0.0671	0.4235
chr1	17865623	17865652	promoter	chr1:17866329-18024369	ARHGEF10L;ENSG00000074964.12;protein_coding	hypo	unmutCLL_NBCB	0.21244	0.46744	0.328318	0.6595
chr1	179005060	179005120	genebody	chr1:178994938-179045697	FAM20B;ENSG00000116199.7;protein_coding	hypo	unmutCLL_NBCB	0.5356	0.98178	0.136433	0.292333
chr1	17933673	17933797	genebody	chr1:17866329-18024369	ARHGEF10L;ENSG00000074964.12;protein_coding	hypo	unmutCLL_NBCB	0.49949	0.76925	0.365905	0.517333
chr1	179410192	179410277	genebody	chr1:179334854-179523870	AXDND1;ENSG00000162779.16;protein_coding	hypo	unmutCLL_NBCB	0.58033	0.958	0.502136	0.675833
chr1	179475662	179475722	genebody	chr1:179334854-179523870	AXDND1;ENSG00000162779.16;protein_coding	hypo	unmutCLL_NBCB	0.6004	0.97522	0.655682	0.785667
chr1	179713229	179713240	promoter	chr1:179712297-179785333	FAM163A;ENSG00000143340.6;protein_coding	hyper	unmutCLL_NBCB	0.43598	0.16187	0.562455	0.499167
chr1	179782089	179782152	genebody	chr1:179712297-179785333	FAM163A;ENSG00000143340.6;protein_coding	hypo	unmutCLL_NBCB	0.57631	0.87633	0.503136	0.475333
chr1	179793682	179793697	intergenic	NA:NA-NA	NA	hypo	unmutCLL_NBCB	0.42257	0.92467	0.398455	0.507667
chr1	17979902	17979980	genebody	chr1:17866329-18024369	ARHGEF10L;ENSG00000074964.12;protein_coding	hypo	unmutCLL_NBCB	0.59674	0.92978	0.454409	0.677333
chr1	17982578	17982674	genebody	chr1:17866329-18024369	ARHGEF10L;ENSG00000074964.12;protein_coding	hypo	mutCLL_MBC	0.54985	0.962	0.40995	0.71
chr1	180204899	180204954	genebody	chr1:180199420-180249380	LHX4;ENSG00000121454.4;protein_coding	hyper	unmutCLL_NBCB	0.36781	0.102	0.364392	0.34925
chr1	18030377	18030483	intergenic	NA:NA-NA	NA	hypo	unmutCLL_NBCB	0.71571	0.97411	0.82555	0.821667
chr1	18033589	18033664	intergenic	NA:NA-NA	NA	hypo	unmutCLL_NBCB	0.4123	0.84356	0.3005	0.410833
chr1	180890438	180890590	genebody	chr1:180882289-180920750	KIAA1614;ENSG00000135835.6;protein_coding	hypo	unmutCLL_NBCB	0.1519	0.96367	0.218273	0.5485
chr1	180892696	180892836	genebody	chr1:180882289-180920750	KIAA1614;ENSG00000135835.6;protein_coding	hypo	unmutCLL_NBCB	0.37804	0.99158	0.621833	0.719222
chr1	180904561	180904709	genebody	chr1:180882289-180920750	KIAA1614;ENSG00000135835.6;protein_coding	hypo	unmutCLL_NBCB	0.65178	0.98033	0.81002	0.889333
chr1	18091289	18091426	genebody	chr1:18081807-18153558	ACTL8;ENSG00000117148.6;protein_coding	hypo	unmutCLL_NBCB	0.67397	0.94522	0.552591	0.6125
chr1	180918592	180918694	genebody	chr1:180882289-180920750,chr1:180913177-180945618	KIAA1614;ENSG00000135835.6;protein_coding,RP11-46A10.5;ENSG00000243155.1;antisense	hypo	mutCLL_MBC,unmutCLL_NBCB	0.42867	0.98856	0.50467	0.99444
chr1	180923681	180923690	genebody,promoter	chr1:180913177-180945618,chr1:180918834-180924023	RP11-46A10.4;ENSG00000232586.1;antisense,RP11-46A10.5;ENSG00000243155.1;antisense	hypo	unmutCLL_NBCB	0.54053	0.79167	0.696455	0.735333
chr1	18093982	18094057	genebody	chr1:18081807-18153558	ACTL8;ENSG00000117148.6;protein_coding	hypo	unmutCLL_NBCB	0.6215	0.89278	0.385182	0.584333
chr1	180986077	180986132	genebody	chr1:180941860-180992047	STX6;ENSG00000135823.9;protein_coding	hypo	unmutCLL_NBCB	0.59246	0.9882	0.771485	0.9525
chr1	18103914	18103953	genebody	chr1:18081807-18153558	ACTL8;ENSG00000117148.6;protein_coding	hypo	mutCLL_MBC	0.758056	0.950167	0.47085	0.73078
chr1	18104195	18104352	genebody	chr1:18081807-18153558	ACTL8;ENSG00000117148.6;protein_coding	hypo	unmutCLL_NBCB	0.61578	0.93227	0.64503	0.790167
chr1	181382535	181382574	promoter	chr1:181382237-181777219	CACNA1E;ENSG00000198216.6;protein_coding	hypo	unmutCLL_NBCB	0.61263	0.935	0.422091	0.4765
chr1	181750216	181750289	genebody	chr1:181382237-181777219	CACNA1E;ENSG00000198216.6;protein_coding	hypo	unmutCLL_NBCB	0.65111	0.99233	0.576682	0.838833
chr1	1819162	1819213	genebody,promoter	chr1:1716728-1822495,chr1:1822909-1824097	GNB1;ENSG00000078369.13;protein_coding,RP1-140A9.1;ENSG00000231050.1;antisense	hypo	unmutCLL_NBCB	0.70175	0.9956	0.789045	0.891917
chr1	181938908	181939045	intergenic	NA:NA-NA	NA	hypo	unmutCLL_NBCB	0.68659	0.947	0.691374	0.877042
chr1	1819992	1820046	promoter	chr1:1716728-1822495,chr1:1822909-1824097	GNB1;ENSG00000078369.13;protein_coding,RP1-140A9.1;ENSG00000231050.1;antisense	hypo	unmutCLL_NBCB	0.72627	0.9835	0.896732	0.9046
chr1	18221390	18221522	intergenic	NA:NA-NA	NA	hypo	unmutCLL_NBCB	0.64063	0.93789	0.5163	0.720333
chr1	182311827	182311904	intergenic	NA:NA-NA	NA	hypo	unmutCLL_NBCB	0.67664	0.983	0.746455	0.8335
chr1	182753380	182753400	intergenic	NA:NA-NA	NA	hypo	unmutCLL_NBCB	0.5659	0.96344	0.735389	0.866167
chr1	182807748	182807809	promoter	chr1:182808503-182856886	DHX9;ENSG00000135829.12;protein_coding	hypo	unmutCLL_NBCB	0.63483	0.99644	0.614	0.931333
chr1	182807991	182808024	promoter	chr1:182808503-182856886	DHX9;ENSG00000135829.12;protein_coding	hypo	unmutCLL_NBCB	0.033633	0.451	0.0389091	0.203667
chr1	18281672	18281703	intergenic	NA:NA-NA	NA	hypo	unmutCLL_NBCB	0.63933	0.98211	0.651182	0.7605
chr1	183228793	183229024	genebody	chr1:183217371-183387737	NMNAT2;ENSG00000157064.6;protein_coding	hypo	unmutCLL_NBCB	0.62643	0.99164	0.856778	0.857833
chr1	183549884	183549939	genebody	chr1:183441350-183567381,chr1:183524697-183560011	NCF2;ENSG00000116701.10;protein_coding,SMG7;ENSG00000116698.16;protein_coding	hypo	unmutCLL_NBCB	0.4041	0.73533	0.453773	0.4835
chr1	1836815	1836965	intergenic	NA:NA-NA	NA	hypo	unmutCLL_NBCB	0.72754	0.97889	0.810591	0.837667
chr1	18380036	18380164	intergenic	NA:NA-NA	NA	hypo	unmutCLL_NBCB	0.6763	0.97689	0.421	0.751
chr1	18387615	18387660	promoter	chr1:18392150-18400906	RP11-174G17.2;ENSG00000261781.1;lincRNA	hypo	unmutCLL_NBCB	0.67546	0.97233	0.742444	0.9245
chr1	1839310	1839369	intergenic	NA:NA-NA	NA	hypo	unmutCLL_NBCB	0.5864	0.90011	0.6215	0.783
chr1	18407037	18407134	intergenic	NA:NA-NA	NA	hypo	unmutCLL_NBCB	0.62074	0.8802	0.679136	0.733833
chr1	1842114	1842141	promoter	chr1:1846265-1848735	CALML6;ENSG00000169885.5;protein_coding	hypo	unmutCLL_NBCB	0.1255	0.97544	0.662045	0.730167
chr1	184251167	184251357	intergenic	NA:NA-NA	NA	hypo	unmutCLL_NBCB	0.72068	0.98244	0.705632	0.822222
chr1	184300917	184301062	genebody,promoter	chr1:184298204-184301960,chr1:184304791-184305081	RN7SL654P;ENSG00000244568.2;misc_RNA,RP11-382D12.1;ENSG00000231791.1;lincRNA	hypo	unmutCLL_NBCB	0.69115	0.9955	0.678955	0.840778
chr1	184490150	184490317	genebody	chr1:184356191-184598154	C1orf21;ENSG00000116667.8;protein_coding	hypo	unmutCLL_NBCB	0.73759	0.99561	0.745378	0.865467
chr1	18474919	18474978	genebody	chr1:18434239-18704977	IGSF21;ENSG00000117154.7;protein_coding	hypo	unmutCLL_NBCB	0.65971	0.97967	0.491167	0.724333
chr1	18479532	18479653	genebody	chr1:18434239-18704977	IGSF21;ENSG00000117154.7;protein_coding	hypo	unmutCLL_NBCB	0.6689	0.966	0.471182	0.707
chr1	1853064	1853151	promoter	chr1:1849028-1850712	TMEM52;ENSG00000178821.8;protein_coding	hypo	unmutCLL_NBCB	0.64903	0.97967	0.680727	0.682667
chr1	185865266	185865318	genebody	chr1:185703682-186160085	HMCN1;ENSG00000143341.7;protein_coding	hypo	unmutCLL_NBCB	0.69493	0.98967	0.507864	0.753333
chr1	18596444	18596550	genebody	chr1:18434239-18704977	IGSF21;ENSG00000117154.7;protein_coding	hypo	unmutCLL_NBCB	0.6041	0.99089	0.668364	0.7945
chr1	186247626	186247717	intergenic	NA:NA-NA	NA	hypo	unmutCLL_NBCB	0.64673	0.96511	0.6032	0.699167
chr1	186594589	186594663	intergenic	NA:NA-NA	NA	hypo	unmutCLL_NBCB	0.73693	0.99344	0.657864	0.742833
chr1	186687617	186687811	intergenic	NA:NA-NA	NA	hypo	unmutCLL_NBCB	0.45894	0.9718	0.329492	0.46925
chr1	186859707	186859841	genebody	chr1:186798084-186958113	PLA2G4A;ENSG00000116711.8;protein_coding	hypo	unmutCLL_NBCB	0.71187	0.98653	0.816364	0.87025
chr1	187063380	187063583	promoter	chr1:187061973-187329455	LINC01036;ENSG00000236030.1;lincRNA	hypo	unmutCLL_NBCB	0.65514	0.98081	0.638615	0.810667
chr1	1872008	1872070	genebody	chr1:1853395-1935276	C1orf222;ENSG00000142609.13;protein_coding	hypo	unmutCLL_NBCB	0.65459	0.94413	0.737437	0.770167
chr1	187297109	187297211	genebody	chr1:187061973-187329455	LINC01036;ENSG00000236030.1;lincRNA	hypo	unmutCLL_NBCB	0.72192	0.9992	0.723975	0.853
chr1	187436657	187436776	genebody	chr1:187412737-187446354	LINC01037;ENSG00000231599.1;lincRNA	hypo	unmutCLL_NBCB	0.41901	0.91233	0.551955	0.778667
chr1	1878999	1879604	genebody	chr1:1853395-1935276	C1orf222;ENSG00000142609.13;protein_coding	hypo	unmutCLL_NBCB	0.62558	0.93424	0.556026	0.597
chr1	187909874	187909940	intergenic	NA:NA-NA	NA	hypo	unmutCLL_NBCB	0.72201	0.99193	0.723712	0.88725
chr1	18822294	18822393	intergenic	NA:NA-NA	NA	hypo	unmutCLL_NBCB	0.53466	0.89511	0.522636	0.662667
chr1	188310680	188310850	intergenic	NA:NA-NA	NA	hypo	unmutCLL_NBCB	0.60846	0.98393	0.699318	0.801
chr1	188419461	188419596	intergenic	NA:NA-NA	NA	hypo	unmutCLL_NBCB	0.61054	0.9898	0.6309	0.816167
chr1	188738457	188738536	intergenic	NA:NA-NA	NA	hypo	unmutCLL_NBCB	0.6923	0.98592	0.782485	0.873111
chr1	188763122	188763177	intergenic	NA:NA-NA	NA	hypo	unmutCLL_NBCB	0.4754	0.95833	0.75825	0.782167
chr1	1888518	1888621	genebody	chr1:1853395-1935276	C1orf222;ENSG00000142609.13;protein_coding	hypo	unmutCLL_NBCB	0.57713	0.93056	0.393818	0.441167
chr1	188932026	188932108	genebody	chr1:188874818-189006393	LINC01035;ENSG00000226486.1;lincRNA	hypo	unmutCLL_NBCB	0.47577	0.95544	0.434818	0.584667
chr1	189048588	189048649	intergenic	NA:NA-NA	NA	hypo	unmutCLL_NBCB	0.59024	0.975	0.569409	0.824833
chr1	1897929	1898040	genebody	chr1:1853395-1935276	C1orf222;ENSG00000142609.13;protein_coding	hypo	unmutCLL_NBCB	0.36444	0.7001	0.262006	0.297056
chr1	19094395	19094529	intergenic	NA:NA-NA	NA	hypo	unmutCLL_NBCB	0.55274	0.94987	0.46005	0.569833
chr1	190980678	190980753	intergenic	NA:NA-NA	NA	hypo	unmutCLL_NBCB	0.56577	0.991	0.669409	0.883667
chr1	19104454	19104578	intergenic	NA:NA-NA	NA	hypo	unmutCLL_NBCB	0.63255	0.986	0.708576	0.714444
chr1	191121424	191121461	promoter	chr1:191120639-191123764	RP11-309H21.3;ENSG00000261642.1;lincRNA	hypo	mutCLL_MBC,unmutCLL_NBCB	0.50068	0.95211	0.36215	0.66433
chr1	19120326	19120413	intergenic	NA:NA-NA	NA	hypo	unmutCLL_NBCB	0.68673	0.954	0.772727	0.902833
chr1	191387779	191387914	intergenic	NA:NA-NA	NA	hypo	unmutCLL_NBCB	0.70065	0.98444	0.6859	0.826
chr1	1917772	1917871	genebody	chr1:1853395-1935276	C1orf222;ENSG00000142609.13;protein_coding	hypo	unmutCLL_NBCB	0.67485	0.96622	0.510273	0.668167
chr1	191779485	191779576	intergenic	NA:NA-NA	NA	hypo	unmutCLL_NBCB	0.70664	0.99567	0.900409	0.886222
chr1	19213034	19213107	genebody,promoter	chr1:19175766-19247615,chr1:19197925-19229275,chr1:19209695-19209769	ALDH4A1;ENSG00000159423.12;protein_coding,MIR4695;ENSG00000265606.1;miRNA,RP13-279N23.2;ENSG00000255275.3;protein_coding	hypo	unmutCLL_NBCB	0.73389	0.99022	0.851955	0.8455
chr1	192146715	192146782	genebody	chr1:192127586-192154945	RGS18;ENSG00000150681.5;protein_coding	hypo	unmutCLL_NBCB	0.69105	0.99711	0.689091	0.811667
chr1	192178853	192178955	intergenic	NA:NA-NA	NA	hypo	unmutCLL_NBCB	0.72366	0.98633	0.6932	0.80475
chr1	19226935	19227030	genebody,promoter	chr1:19175766-19247615,chr1:19197925-19229275,chr1:19223564-19223642	ALDH4A1;ENSG00000159423.12;protein_coding,MIR1290;ENSG00000221662.1;miRNA,RP13-279N23.2;ENSG00000255275.3;protein_coding	hypo	mutCLL_MBC	0.5444	0.730833	0.44999	0.75
chr1	192411408	192411542	intergenic	NA:NA-NA	NA	hypo	unmutCLL_NBCB	0.62607	0.98144	0.708341	0.799333
chr1	19250520	19250595	genebody,promoter	chr1:19175766-19247615,chr1:19230774-19283180	IFFO2;ENSG00000169991.6;protein_coding,RP13-279N23.2;ENSG00000255275.3;protein_coding	hypo	mutCLL_MBC	0.0226	0.0453333	0.34021	0.64189
chr1	19254775	19254798	genebody	chr1:19230774-19283180	IFFO2;ENSG00000169991.6;protein_coding	hypo	mutCLL_MBC	0.0189	0.184167	0.088539	0.39767
chr1	1927084	1927143	genebody	chr1:1853395-1935276	C1orf222;ENSG00000142609.13;protein_coding	hypo	unmutCLL_NBCB	0.70287	0.99622	0.682227	0.813
chr1	192864376	192864429	intergenic	NA:NA-NA	NA	hypo	unmutCLL_NBCB	0.69035	0.98867	0.561091	0.655667
chr1	19292405	19292512	intergenic	NA:NA-NA	NA	hypo	unmutCLL_NBCB	0.57422	0.95033	0.237614	0.238833
chr1	19358952	19359066	intergenic	NA:NA-NA	NA	hypo	unmutCLL_NBCB	0.67804	0.96158	0.524183	0.657222
chr1	19361008	19361176	intergenic	NA:NA-NA	NA	hypo	unmutCLL_NBCB	0.70125	0.9689	0.717894	0.744611
chr1	193900466	193900571	intergenic	NA:NA-NA	NA	hypo	unmutCLL_NBCB	0.69098	0.99956	0.610714	0.823333
chr1	19395979	19396072	intergenic	NA:NA-NA	NA	hypo	unmutCLL_NBCB	0.7106	0.991	0.771067	0.777889
chr1	194151138	194151254	genebody	chr1:194118602-194167824	RP11-563D10.1;ENSG00000227240.1;lincRNA	hypo	unmutCLL_NBCB	0.72225	0.99867	0.723	0.87
chr1	1941583	1941642	intergenic	NA:NA-NA	NA	hypo	unmutCLL_NBCB	0.57108	0.99742	0.750333	0.832667
chr1	194312073	194312182	intergenic	NA:NA-NA	NA	hypo	mutCLL_MBC	0.895722	0.906889	0.31251	0.57489
chr1	194558451	194558583	intergenic	NA:NA-NA	NA	hypo	unmutCLL_NBCB	0.5936	0.88367	0.515727	0.576167
chr1	1947998	1948037	promoter	chr1:1944651-1946969,chr1:1950779-1962192	GABRD;ENSG00000187730.6;protein_coding,RP11-547D24.1;ENSG00000233542.1;antisense	hypo	unmutCLL_NBCB	0.4879	0.98822	0.51495	0.646833
chr1	194872413	194872551	intergenic	NA:NA-NA	NA	hypo	unmutCLL_NBCB	0.63627	0.9856	0.584576	0.697
chr1	194912989	194913058	intergenic	NA:NA-NA	NA	hypo	unmutCLL_NBCB	0.70845	0.99967	0.761545	0.805
chr1	195070073	195070190	intergenic	NA:NA-NA	NA	hypo	unmutCLL_NBCB	0.59428	0.98711	0.545818	0.673667
chr1	195263762	195263923	intergenic	NA:NA-NA	NA	hypo	unmutCLL_NBCB	0.63454	0.96558	0.572288	0.772111
chr1	195294369	195294447	intergenic	NA:NA-NA	NA	hypo	unmutCLL_NBCB	0.58922	0.95933	0.713682	0.875667
chr1	195508304	195508410	intergenic	NA:NA-NA	NA	hypo	unmutCLL_NBCB	0.72722	0.98406	0.674205	0.837533
chr1	195667425	195667561	intergenic	NA:NA-NA	NA	hypo	unmutCLL_NBCB	0.66814	0.98594	0.618936	0.754067
chr1	195732560	195732706	intergenic	NA:NA-NA	NA	hypo	unmutCLL_NBCB	0.63554	0.9652	0.689958	0.853867
chr1	195752654	195752778	intergenic	NA:NA-NA	NA	hypo	unmutCLL_NBCB	0.71671	0.99707	0.71042	0.819833
chr1	195830445	195830577	intergenic	NA:NA-NA	NA	hypo	unmutCLL_NBCB	0.56214	0.99233	0.662311	0.835917
chr1	196115721	196115842	intergenic	NA:NA-NA	NA	hypo	unmutCLL_NBCB	0.67843	0.94144	0.60615	0.698667
chr1	1962928	1963000	intergenic	NA:NA-NA	NA	hypo	unmutCLL_NBCB	0.53784	0.93356	0.802727	0.838667
chr1	1963746	1963798	intergenic	NA:NA-NA	NA	hypo	mutCLL_MBC	0.726517	0.958	0.52487	0.80917
chr1	19652886	19652898	genebody	chr1:19638819-19655794	PQLC2;ENSG00000040487.8;protein_coding	hyper	mutCLL_MBC	0.90225	0.968	0.83361	0.56456
chr1	1970391	1970464	intergenic	NA:NA-NA	NA	hypo	unmutCLL_NBCB	0.72195	0.97978	0.541227	0.593833
chr1	19719923	19719986	genebody	chr1:19665266-19812066	CAPZB;ENSG00000077549.13;protein_coding	hypo	unmutCLL_NBCB	0.644	0.94967	0.7423	0.874
chr1	19722250	19722366	genebody	chr1:19665266-19812066	CAPZB;ENSG00000077549.13;protein_coding	hypo	unmutCLL_NBCB	0.42941	0.99258	0.606364	0.812889
chr1	197398613	197398723	genebody	chr1:197170591-197447585	CRB1;ENSG00000134376.10;protein_coding	hypo	unmutCLL_NBCB	0.70799	0.98667	0.782212	0.845
chr1	19749003	19749056	genebody,promoter	chr1:19665266-19812066,chr1:19750877-19751163	CAPZB;ENSG00000077549.13;protein_coding,RN7SL277P;ENSG00000240490.2;misc_RNA	hypo	unmutCLL_NBCB	0.60407	0.98367	0.772583	0.833333
chr1	197859713	197859744	intergenic	NA:NA-NA	NA	hypo	unmutCLL_NBCB	0.74716	0.99956	0.819063	0.908
chr1	197892376	197892403	genebody	chr1:197881036-197904608	LHX9;ENSG00000143355.11;protein_coding	hypo	mutCLL_MBC	0.588278	0.8405	0.66391	0.93267
chr1	197892376	197892411	genebody	chr1:197881036-197904608	LHX9;ENSG00000143355.11;protein_coding	hypo	unmutCLL_NBCB	0.55721	0.83075	0.6776	0.932667
chr1	198054447	198054581	intergenic	NA:NA-NA	NA	hypo	unmutCLL_NBCB	0.74414	0.99467	0.777431	0.877095
chr1	19812791	19812798	promoter	chr1:19665266-19812066	CAPZB;ENSG00000077549.13;protein_coding	hypo	unmutCLL_NBCB	0.22231	0.56889	0.1035	0.122
chr1	19812922	19812955	promoter	chr1:19665266-19812066	CAPZB;ENSG00000077549.13;protein_coding	hypo	unmutCLL_NBCB	0.25327	0.81567	0.081125	0.151833
chr1	1982945	1983101	promoter	chr1:1980641-1981509,chr1:1981908-2116834	PRKCZ;ENSG00000067606.11;protein_coding,RP11-547D24.3;ENSG00000226969.1;antisense	hypo	unmutCLL_NBCB	0.45597	0.9061	0.605862	0.848278
chr1	1984771	1984783	genebody,promoter	chr1:1980641-1981509,chr1:1981908-2116834	PRKCZ;ENSG00000067606.11;protein_coding,RP11-547D24.3;ENSG00000226969.1;antisense	hypo	unmutCLL_NBCB	0.4239	0.99189	0.471	0.64
chr1	199241942	199242010	genebody	chr1:199117725-199362435	RP11-382E9.1;ENSG00000231718.1;lincRNA	hypo	unmutCLL_NBCB	0.65682	0.92344	0.284682	0.21
chr1	199883322	199883405	intergenic	NA:NA-NA	NA	hypo	unmutCLL_NBCB	0.6549	0.98989	0.472045	0.625833
chr1	1998996	1999038	genebody	chr1:1981908-2116834	PRKCZ;ENSG00000067606.11;protein_coding	hypo	unmutCLL_NBCB	0.6326	0.97444	0.635545	0.7635
chr1	19992322	19992338	promoter	chr1:19991779-20006055	HTR6;ENSG00000158748.3;protein_coding	hyper	unmutCLL_NBCB	0.59826	0.34711	0.628318	0.549833
chr1	199945265	199945311	intergenic	NA:NA-NA	NA	hypo	unmutCLL_NBCB	0.64613	0.93011	0.37715	0.534833
chr1	200247654	200247799	intergenic	NA:NA-NA	NA	hypo	unmutCLL_NBCB	0.62022	0.97178	0.584291	0.7746
chr1	2003603	2003697	genebody	chr1:1981908-2116834	PRKCZ;ENSG00000067606.11;protein_coding	hypo	unmutCLL_NBCB	0.47535	0.99147	0.401	0.884333
chr1	200518524	200518652	intergenic	NA:NA-NA	NA	hypo	unmutCLL_NBCB	0.72179	0.98825	0.631442	0.752524
chr1	200851523	200851664	intergenic	NA:NA-NA	NA	hypo	unmutCLL_NBCB	0.5456	0.99067	0.329136	0.428667
chr1	200863899	200864026	genebody	chr1:200860175-200884863	C1orf106;ENSG00000163362.6;protein_coding	hypo	unmutCLL_NBCB	0.73644	0.99022	0.623091	0.744333
chr1	200937160	200937194	intergenic	NA:NA-NA	NA	hypo	unmutCLL_NBCB	0.67396	0.99644	0.762091	0.893333
chr1	200940567	200940633	genebody	chr1:200938519-200992828	KIF21B;ENSG00000116852.10;protein_coding	hypo	mutCLL_MBC,unmutCLL_NBCB	0.10036	0.97513	0.1864	0.5518
chr1	201045304	201045389	genebody	chr1:201008641-201081694	CACNA1S;ENSG00000081248.6;protein_coding	hypo	unmutCLL_NBCB	0.70623	0.96989	0.595909	0.7585
chr1	201129928	201129979	genebody	chr1:201103899-201140702	TMEM9;ENSG00000116857.12;protein_coding	hypo	mutCLL_MBC,unmutCLL_NBCB	0.155	0.91311	0.31342	0.68889
chr1	201222808	201222857	intergenic	NA:NA-NA	NA	hypo	unmutCLL_NBCB	0.63152	0.95733	0.596033	0.6425
chr1	201307340	201307377	intergenic	NA:NA-NA	NA	hypo	unmutCLL_NBCB	0.6584	0.96867	0.622455	0.7815
[truncated: 21,697 more rows]
